# Frequency Matrix Approach Demonstrates High Sequence Quality in Avian BARCODEs and Highlights Cryptic Pseudogenes

Mark Y. Stoeckle<sup>1\*</sup>, Kevin C. R. Kerr<sup>2</sup>

**1** Program for the Human Environment, Rockefeller University, New York, New York, United States of America, **2** Royal Ontario Museum, Department of Natural History, Toronto, Ontario, Canada

## Abstract

The accuracy of DNA barcode databases is critical for research and practical applications. Here we apply a frequency matrix to assess sequencing errors in a very large set of avian BARCODEs. Using 11,000 sequences from 2,700 bird species, we show most avian cytochrome *c* oxidase I (COI) nucleotide and amino acid sequences vary within a narrow range. Except for third codon positions, nearly all (96%) sites were highly conserved or limited to two nucleotides or two amino acids. A large number of positions had very low frequency variants present in single individuals of a species; these were strongly concentrated at the ends of the barcode segment, consistent with sequencing error. In addition, a small fraction (0.1%) of BARCODEs had multiple very low frequency variants shared among individuals of a species; these were found to represent overlooked cryptic pseudogenes lacking stop codons. The calculated upper limit of sequencing error was  $8 \times 10^{-5}$  errors/nucleotide, which was relatively high for direct Sanger sequencing of amplified DNA, but unlikely to compromise species identification. Our results confirm the high quality of the avian BARCODE database and demonstrate significant quality improvement in avian COI records deposited in GenBank over the past decade. This approach has potential application for genetic database quality control, discovery of cryptic pseudogenes, and studies of low-level genetic variation.

**Citation:** Stoeckle MY, Kerr KCR (2012) Frequency Matrix Approach Demonstrates High Sequence Quality in Avian BARCODEs and Highlights Cryptic Pseudogenes. PLoS ONE 7(8): e43992. doi:10.1371/journal.pone.0043992

**Editor:** Zhuang Zuo, UT MD Anderson Cancer Center, United States of America

**Received:** April 3, 2012; **Accepted:** July 26, 2012; **Published:** August 27, 2012

**Copyright:** © 2012 Stoeckle, Kerr. This is an open-access article distributed under the terms of the Creative Commons Attribution License, which permits unrestricted use, distribution, and reproduction in any medium, provided the original author and source are credited.

**Funding:** KCRK was supported by a post-doctoral fellowship from the Natural Sciences and Engineering Research Council of Canada (NSERC). The funders had no role in study design, data collection and analysis, decision to publish, or preparation of the manuscript.

**Competing Interests:** The authors have declared that no competing interests exist.

\* E-mail: mark.stoeckle@rockefeller.edu

## Introduction

Beginning in 2003, researchers have been building a library of short genetic identifiers – DNA barcodes – for all animal, plant, and fungal species [1,2]. The effort aims to simplify species identification, including for specimens missing diagnostic features (e.g. fragments and immature or vegetative forms) or when taxonomic expertise is not available [3]. The agreed upon standard DNA barcode for animals is a 648 base pair (bp) region encompassing 216 codons of cytochrome *c* oxidase I (COI), which contains enough sequence diversity to separate most species and is relatively easy to amplify from most taxa using a limited set of primers [4–6].

Most DNA barcode studies so far focus on diagnostic accuracy in distinguishing closely related species and the biological meaning of discordance, i.e., barcode clusters with multiple species or species with multiple barcode clusters [7–11]. Beyond species identification, growing libraries of DNA barcodes offer opportunities for investigating mitochondrial evolution and higher-level taxonomy [12,13]. COI barcodes represent the largest, most taxonomically diverse set of mitochondrial sequences presently available, with approximately 260,000 records from 37,000 animal species in GenBank under keyword BARCODE. The next largest set of mtDNA sequences in GenBank is cytochrome *b* with 157,000 records from 26,000 species. Advantages of the BARCODE standard include a minimum of 500 bp from a

defined region, linkage to museum specimens, and publicly archived trace files documenting a minimum quality score [4].

The accuracy of the barcode reference database is critical to research and practical applications. Potential inaccuracies include incorrect taxonomic labels, overlooked pseudogenes, and sequencing errors. Taxonomic mislabelings due to misidentified specimens, outdated taxonomy, database errors, or laboratory mix-ups are a recognized hazard in nucleotide sequence databases [14–16]. The BARCODE standard mandates linkage to museum specimens, helping ensure valid identifications and facilitating re-examination in questionable cases. To minimize depositing mislabeled records, Barcode of Life Datasystems (BOLD) workbench tools highlight sequences with anomalous taxonomic placements in neighbor-joining (NJ) trees and flag records containing stop codons, typically present in pseudogenes [2]. To minimize sequencing errors, the BARCODE standard calls for bidirectional sequencing and publicly archived trace files with minimum PHRED scores. However to date there is no direct way of assessing sequence errors in published records.

Here we test the hypothesis that sequencing errors in reference barcodes can be detected as very low frequency variants at positions that are otherwise highly conserved. We use this approach to assess sequencing error in the recently available, very large avian BARCODE dataset. With GenBank COI records for approximately one-third of the 10,000 species of birds, they are

one of the best-sampled animal groups to date [17–24]. We suggest application of our findings to quality assessment of nucleotide databases, including a method for identifying cryptic pseudogenes, and discuss implications for studies of low-level sequence variation.

## Methods

Avian BARCODE records in GenBank on January 28, 2012 were retrieved using search phrase: “aves [organism] AND BARCODE [keyword] AND (COI [gene name] OR *cox1* [gene name]) NOT phase\_0.” “Phase 0” refers to GenBank BARCODE records that are identified only to order; these were excluded from analysis. The resulting fasta file contained 11,333 records with 2,718 species names. Fasta file names were reconciled with an authority file used for All Birds Barcoding Initiative (ABBI) using Name\_Lookup available at [www.barcodingbirds.org](http://www.barcodingbirds.org). Twelve synonyms were found, resolving the file into 2,706 species. Taxonomic coverage was assessed via comparison to the ABBI authority file. Sequences were aligned in MEGA using MUSCLE and the resulting alignment was checked by eye [25,26]. The file was trimmed to include 648 positions corresponding to bovine COI nucleotides 51–699 [4]. To assess changes in record quality over time, a similar procedure was followed except that the publication date field [PDAT] was used to download avian BARCODE and non-BARCODE (“NOT BARCODE [keyword]”) COI records according to date deposited in GenBank, beginning with January 1, 2000.

To our knowledge, existing nucleotide sequence analysis programs are not designed to analyze the spatial distribution of rare differences among very large sets of sequences representing thousands of species. We therefore created a set of analytic functions in Excel. For each position, the fraction of sequences with each nucleotide or amino acid residue was calculated and recorded in a frequency matrix. The most abundant (1<sup>st</sup> modal) and second most abundant (2<sup>nd</sup> modal) nucleotide or amino acid at each position, and the fraction of sequences occupied by these residues were determined, excluding sites with missing data. For each BARCODE, the number of sites that differed from the 1<sup>st</sup> modal nucleotide and amino acid sequences was calculated. The sequence alignments and frequency matrices are available in Datasets S1 and S2, respectively. Sequences containing very low frequency variants (VLFs), defined as nucleotide or amino acid residues present in less than 0.1% of the set, were sorted according to whether the VLFs were present in single or multiple individuals of a species. Trace files archived in BOLD were examined in some cases as detailed below.

## Results

To date GenBank contains about 16,000 COI sequences from 3,500 bird species. For this study, those with BARCODE keyword were analyzed. The avian BARCODE dataset comprised 11,333 records from 2,706 species, representing 27% of all bird species, 73% of families, and 96% of orders (Fig. 1). There were an average of 4.2 sequences/species (range 1–125); 573 species had single sequences.

Most nucleotide and amino acid positions in the COI barcode region were more than 99.9% conserved (Table 1, Fig. 2). Variation in the remaining sites was largely binary, i.e., limited to two of four nucleotides or two of 20 amino acids at a given position. As compared to the modal nucleotide and amino acid sequences, there was a relatively narrow range of variation, except at third codon positions (Table 1).

## Distribution of very low frequency nucleotide variants

Sorting positions by variability demonstrated a long tail of nearly but not completely conserved sites (Fig. 2). To characterize further, BARCODEs containing very low frequency nucleotide variants (nVLFs) were selected for further analysis. nVLFs were categorized as to whether they were *singleton* variants present in one individual of a species, or *shared* variants present in two or more individuals of a species (Table 2). When analyzed by spatial location, singleton nVLFs were found to be strongly concentrated at the ends of the barcode segment, consistent with sequencing error (Fig. 3). In birds, the 5' end of the barcode region is generally more difficult to sequence than the 3' end, and the distribution of singletons matched this asymmetry. In contrast, shared nVLFs were relatively evenly distributed across the barcode segment, consistent with a biological origin (Fig. 3). Sliding window analysis is useful for detecting spatial patterns hidden in noisy data (e.g., [27]). Given the relatively simple patterns seen in Fig. 3, it was not surprising that a sliding window analysis also showed singleton but not shared nVLFs concentrated at the 5'>3' ends of the barcode segment, mirroring the histogram distributions (Fig. S1).

## Nucleotide sequencing error rate

Assuming the error rate is the same at all codon positions, it was possible to use the frequency of singleton nVLFs at second codon positions to calculate an error rate for the dataset. As nearly all (94%) second codon positions were >99.9% conserved, sequencing errors at these sites, if any, must be contained within the variable 0.1%, i.e., nVLFs. Possible “back mutation” errors at shared (biological) nVLF sites could be ignored, since such sites were present in only about 2% of sequences and therefore would make a negligible contribution to the total. BARCODEs representing a single individual of a species were excluded from the calculation, as it was not possible to determine if nVLFs in these sequences were shared among individuals of a species. Next, second codon position *shared* nVLFs were set aside as likely biological variants, leaving 187 second codon position singleton nVLFs scattered among the 10,760 BARCODEs that represented two or more individuals of species. Thus,

$$\frac{187 \text{nd positions singleton nVLFs (probable sequence errors)}}{2162 \text{nd positions / BARCODE} \times 10,760 \text{ BARCODEs}} \\ = 8.0 \times 10^{-5} \text{ errors/bp (95\% CI : } 6.9 - 9.3 \times 10^{-5} \text{)},$$

which is equivalent to approximately 0.05 errors/BARCODE ( $8.0 \times 10^{-5}$  errors/bp  $\times$  648 bp/BARCODE).

As some singleton nVLFs may be unrecognized biological variants, this can be considered an upper limit for the true error rate.

## Very low frequency amino acid variants

It seemed likely that the rarity of nVLFs reflected strong selection against substitutions that result in amino acid changes. Thus it was not surprising that about 80% of nucleotide VLFs were associated with amino acid VLFs (aaVLFs), and vice versa, and that the distributions of singleton and shared amino acid and nucleotide VLFs across the barcode segment were similar (Table 2, Fig. 3).

Only four (0.2%) of the 2,133 species with multiple BARCODEs had three or more shared aaVLFs: *Nothoprocta ornata* (order Tinamiformes, family Tinamidae) (2 sequences, 6 shared VLFs), *Empidonax albonum* (7 sequences, 2–3 shared VLFs) and *Cnemotriccus*

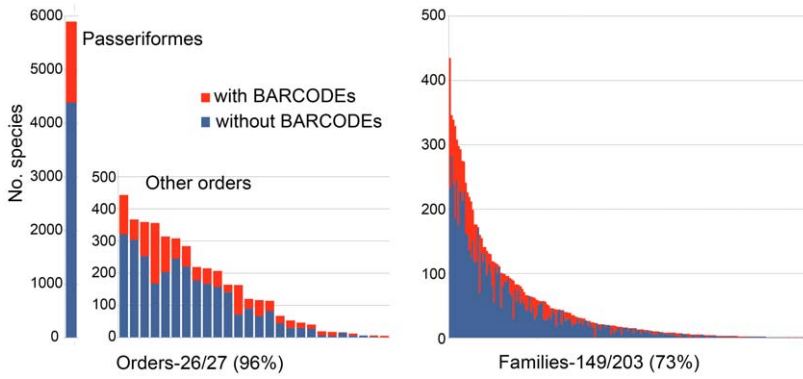

**Figure 1. Representation of avian orders and families in BARCODE library.**  
doi:10.1371/journal.pone.0043992.g001

*fuscatus* (2 sequences, 3 shared VLFs) (both in order Passeriformes, family Tyannidae), and *Branta canadensis* (order Anseriformes, family Anatidae) (2 sequences, 3 shared VLFs). These outliers might represent accurate COI sequences with an unusual number

of rare substitutions, sequences with multiple errors, or overlooked pseudogenes. Trace files archived on Barcode of Life Data Systems (BOLD) were examined, as were all conspecific sequences including non-BARCODE records in GenBank. As detailed

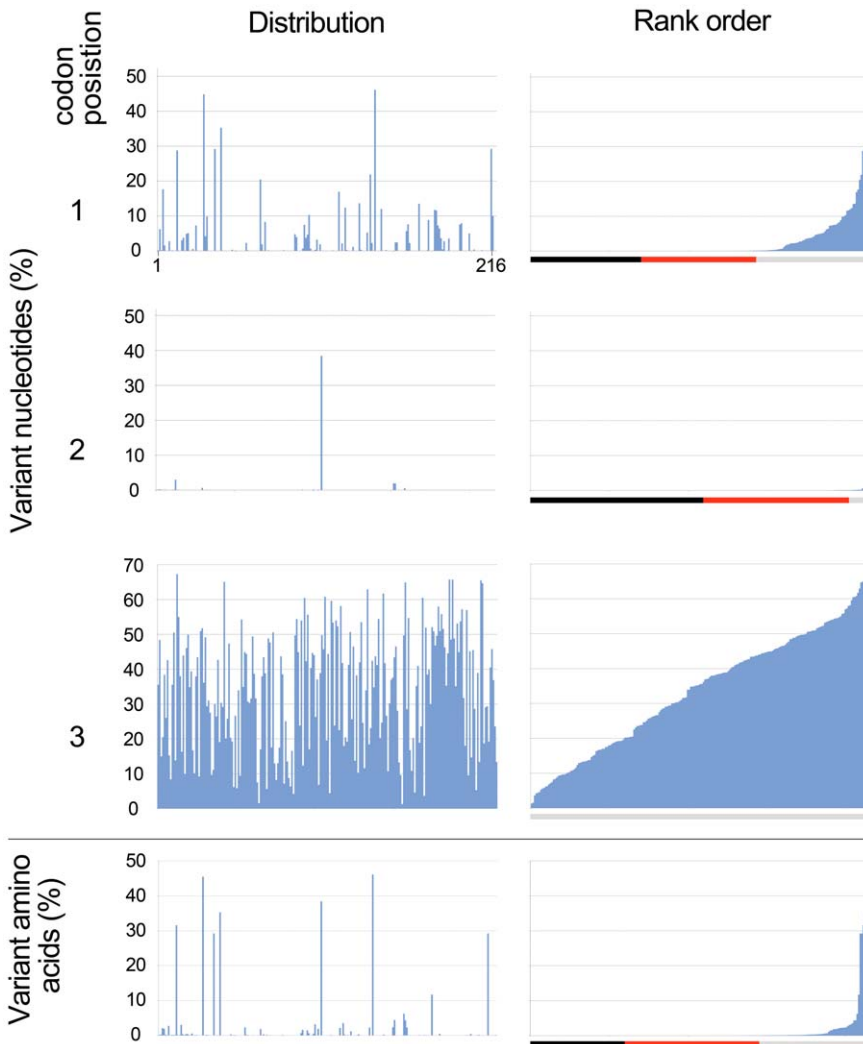

**Figure 2. Variant nucleotide and amino acid positions among 11,333 avian BARCODEs.** Bars below ranked histograms show conservation of positions: 100% (black), <100% and >99.9% (red), and <99.9% (gray).  
doi:10.1371/journal.pone.0043992.g002

**Table 1.** Conservation of nucleotide and amino acid positions in avian BARCODEs.

|                                           | 1 <sup>st</sup> modal 100% | 1 <sup>st</sup> modal >99.9% | 1 <sup>st</sup> +2 <sup>nd</sup> modal >99.9% | average no. differences vs. 1 <sup>st</sup> modal, range |
|-------------------------------------------|----------------------------|------------------------------|-----------------------------------------------|----------------------------------------------------------|
| Nucleotide 1 <sup>st</sup> codon position | 68 (31)                    | 141 (65)                     | 198 (92)                                      | 5.6, 0–16                                                |
| Nucleotide 2 <sup>nd</sup> codon position | 110 (51)                   | 202 (94)                     | 216 (100)                                     | 0.5, 0–15                                                |
| Nucleotide 3 <sup>rd</sup> codon position | 0 (0)                      | 0 (0)                        | 70 (32)                                       | 72, 37–110                                               |
| Amino acid                                | 59 (27)                    | 146 (69)                     | 197 (97)                                      | 3.7, 0–15                                                |

Number of conserved and highly conserved positions and average number and range of differences from the 1<sup>st</sup> modal sequence are shown. Percentages are given in parentheses.

doi:10.1371/journal.pone.0043992.t001

below, the outlier sequences appear to represent cryptic pseudogenes lacking stop codons.

For *N. omata*, the VLF sequences (GenBank accession nos. JQ175579, JQ175580) were deeply divergent (12% Kimura 2-Parameter (K2P) distance) from a conspecific BARCODE (GenBank accession no. JQ175578) collected at the same locality. The BOLD ID engine gave similar results with an additional finding of five unpublished *N. omata* records matching the non-VLF *N. omata* BARCODE (Fig. S2). Finally, the *N. omata* VLF BARCODEs had a 3 bp deletion at positions 619–621, confirmed by review of trace files, not found in any other of the 11,000 avian BARCODEs. Given these findings, we conclude that the *N. omata* sequences with VLFs represent a pseudogene, overlooked due to the absence of stop codons and frameshift mutations.

For *E. alnorum*, there were no conspecific sequences in GenBank without VLFs. However, trace files showed an overlooked single base insertion, which disrupts the reading frame, in a stretch of C's near position 470, followed by an abrupt transition to overlapping peaks downstream (Fig. 4). These findings are consistent with a pseudogene containing a single base insertion co-amplified with

the native sequence. Upstream of insertion site, trace files show multiple double peaks including underlying the VLF at position 176, further evidence of co-amplification.

For *C. fuscatus*, the VLF sequences differed from conspecifics without VLFs by about 6% K2P. Trace files for outlier sequences showed multiple double peaks, including at three of the five VLF sites, consistent with a co-amplified pseudogene (Fig. 5A). For *B. canadensis*, there were multiple (>100) conspecifics without VLFs. Similar to the above cases, trace files for outlier sequences (DQ434449, DQ434453) showed double peaks at VLF sites consistent with co-amplification of a short pseudogene corresponding to the 5' end of the barcode segment (Fig. 5B).

**Database quality comparison**

We applied the nucleotide frequency matrix to determine differences among BARCODE vs. non-BARCODE records and changes over time. Sequences without conspecifics, previously published COI pseudogenes, and records labeled as “COI-like” were excluded. Barcodes extracted from complete mitochondrial genomes were analyzed separately. There were fewer sequences

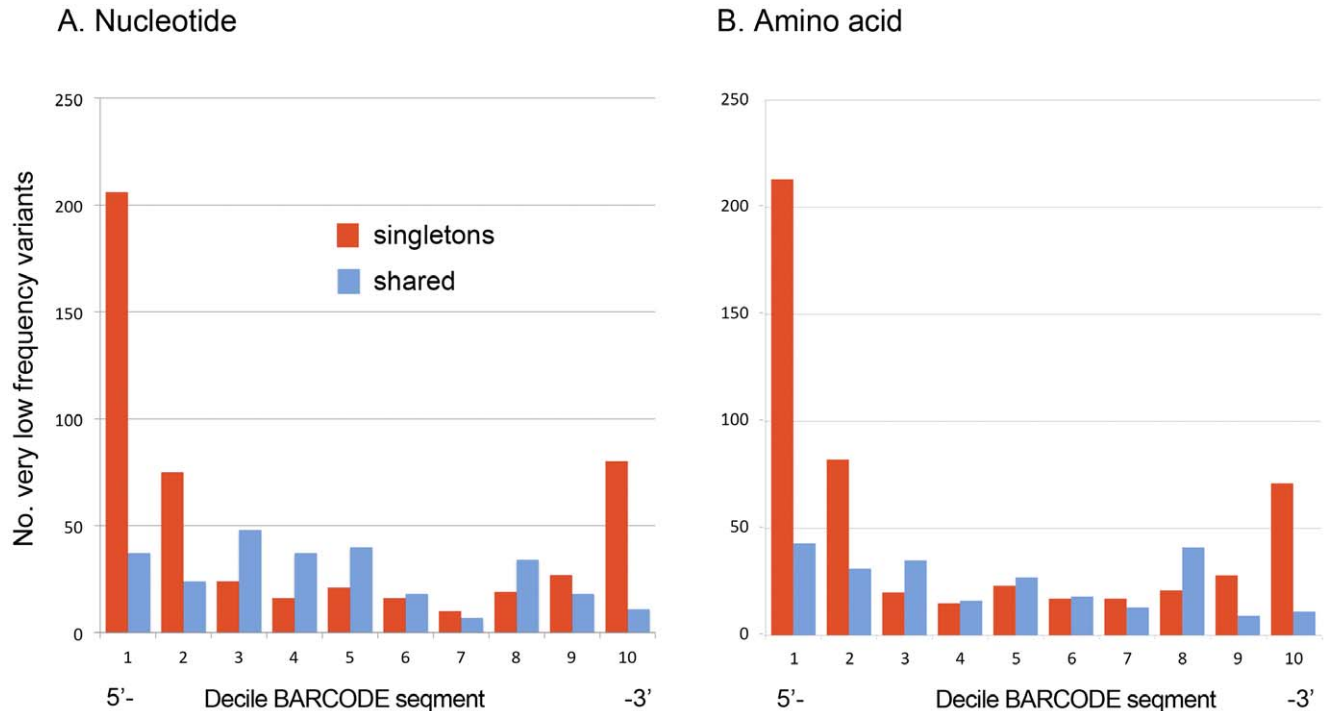

**Figure 3.** Distribution of very low frequency (VLF) variants across barcode segment. A) Nucleotide. B) Amino acid.

doi:10.1371/journal.pone.0043992.g003

**Table 2.** Singleton and shared very low frequency (VLF) variants in avian BARCODEs.

|                   | Nucleotide |      |            | Amino acid |      |            | Concordance |         |      |
|-------------------|------------|------|------------|------------|------|------------|-------------|---------|------|
|                   | VLFs       | Seqs | Ave, range | VLFs       | Seqs | Ave, range | nt only     | aa only | both |
| Singleton         | 494        | 347  | 1.4, 1–15  | 507        | 391  | 1.3, 1–7   | 23          | 67      | 324  |
| Shared            | 274        | 202  | 1.3, 1–5   | 244        | 190  | 1.3, 1–6   | 50          | 40      | 152  |
| Pseudogene subset | 40         | 13   | 3.1, 3–5   | 44         | 13   | 3.4, 2–6   | 0           | 0       | 13   |

The subset of shared VLFs contained in pseudogenes is shown at bottom. The concordance of sequences with nucleotide (nt) and amino acid (aa) VLFs is shown at right.

doi:10.1371/journal.pone.0043992.t002

with singleton nVLFs, i.e., probable errors, among BARCODE as compared to non-BARCODE avian COI records, and significant improvement in both categories over the past decade (Fig. 6). COI sequences extracted from complete mitochondrial genomes had a greater prevalence of error than did recent BARCODE submissions.

**Discussion**

In this study we applied frequency matrix analysis to 11,000 avian BARCODEs. We found that very low frequency variants present in single individuals of a species were strongly concentrated at the ends of the barcode segment, consistent with sequencing error. In addition, the frequency matrix approach led to recognizing a number of overlooked cryptic pseudogenes lacking stop codons. Our findings confirm the overall high quality of the avian dataset, supporting the effectiveness of BARCODE quality standards. The observed frequency of sequencing errors

(on average about one error per 20 sequences) is unlikely to affect the accuracy of species identification.

The calculated upper limit for sequencing error,  $8 \times 10^{-5}$  errors/nucleotide, was relatively high for direct sequencing of PCR amplicons, the standard method for generating reference DNA barcodes [28,29]. To our knowledge, this is the first estimate of sequencing error rate in a large BARCODE dataset created by multiple researchers. An advantage of the frequency matrix approach utilized here is that it flags probable errors directly, as opposed to an indirect indicator such as sequence quality. There are several limitations to the error rate calculation. First, a frequency matrix can only detect sequencing errors at positions that are otherwise highly conserved. At more variable positions, sequencing error is likely to result in a common biological variant. However, the error rate was based on singleton nVLFs at second codon positions, which were more than 99.9% conserved at nearly all (94%) sites, so this should not be a significant limitation. Second, some VLFs may be miscategorized. Although the set of singletons as a whole has a strongly U-shaped distribution

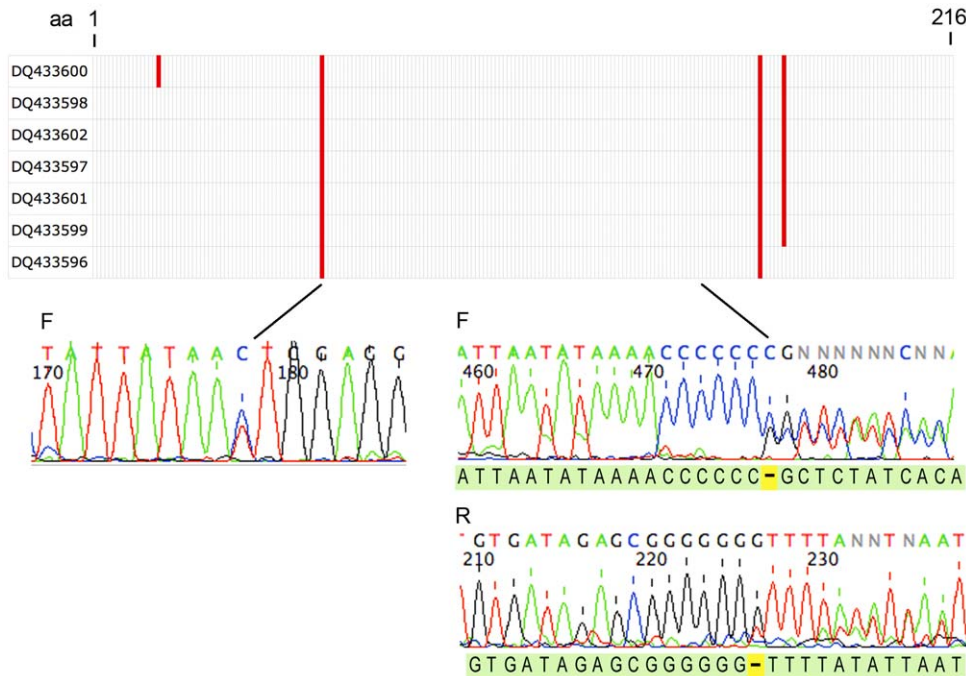

**Figure 4.** *Empidonax alnorum* BARCODEs represent a co-amplified pseudogene. Schematic shows positions of amino acid VLFs in barcode segment for *E. alnorum* BARCODEs with GenBank accession numbers as indicated. Representative trace files shown below display a double peak underlying the 5' amino acid VLF and an overlooked single base insertion near nucleotide position 470. The GenBank fasta file sequence corresponding to the insertion site is shown below the traces with the unrecorded nucleotide in yellow.

doi:10.1371/journal.pone.0043992.g004

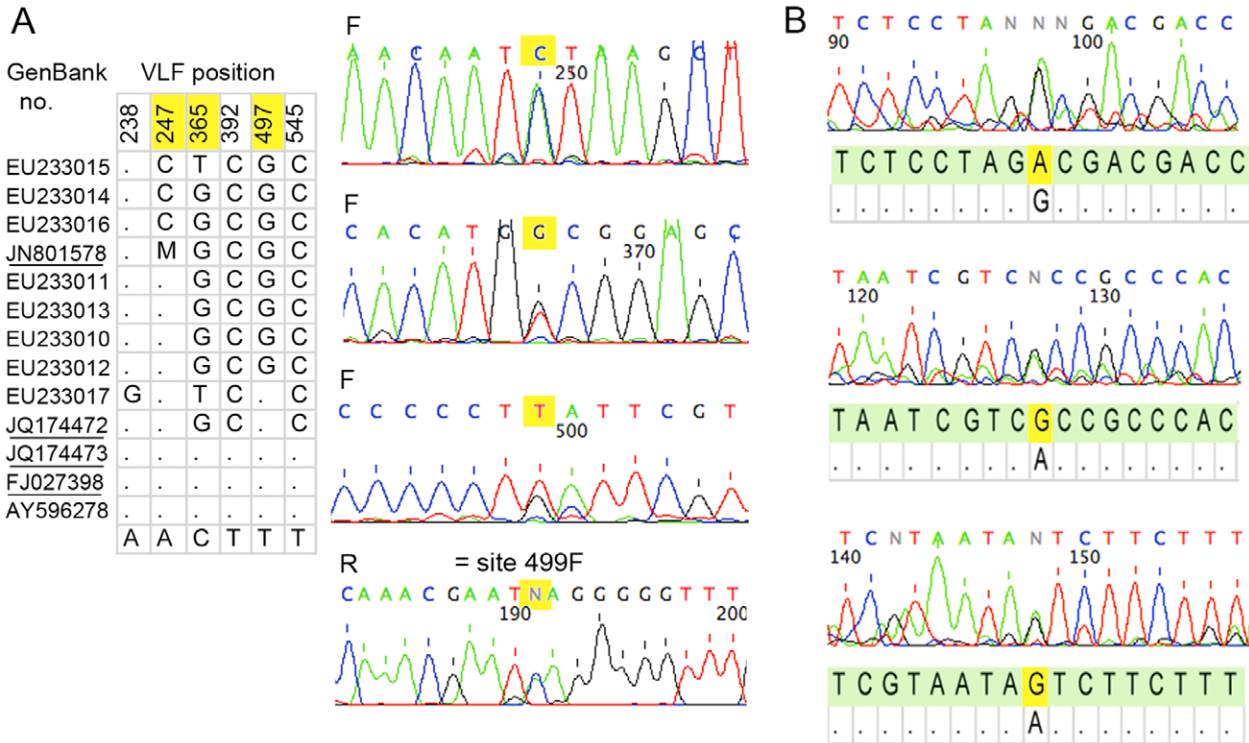

**Figure 5. Additional BARCODEs with multiple shared amino acid VLFs reflect co-amplified pseudogenes.** A) *Cnemotriccus fuscatus*. Nucleotides underlying amino acid VLFs for all *C. fuscatus* GenBank records are shown (underlined are BARCODEs); complete mitochondrial genome sequence AY596278 is at bottom. Representative trace files show double peaks at VLF positions highlighted in yellow (BARCODE numbering differs by 2 from forward trace files). B) *B. canadensis*. Trace files for outlier BARCODEs display double peaks at VLF sites. The GenBank fasta file sequence for these records is shown with the VLF nucleotide highlighted in yellow and the sequence from a representative conspecific BARCODE lacking VLFs below.  
doi:10.1371/journal.pone.0043992.g005

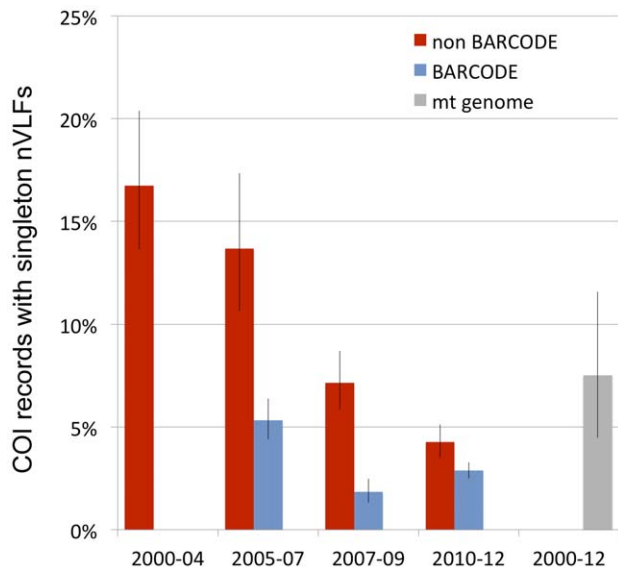

**Figure 6. Prevalence of singleton nucleotide VLFs in avian BARCODE and non-BARCODE COI records deposited in GenBank since January 1, 2000.** Intervals are January 1, 2000 to December 31, 2004 (2000–04); January 1, 2005 to June 30, 2007 (2005–07); July 1, 2007 to December 31, 2009 (2007–09), and January 1, 2010 to April 30, 2012 (2010–12). Bars indicate 95% confidence intervals.  
doi:10.1371/journal.pone.0043992.g006

indicating sequencing error, this may include accurate sequences with rare variants or pseudogenes (e.g., Figs. 7, S3). As above, we therefore consider this to be an upper limit of the true sequencing error rate.

We note that the error rate calculation is based on the observed pattern of variation in the set of avian BARCODEs examined. Other nucleotide sequence datasets including barcodes representing other groups may show reduced conservation at second positions, in which case this method of error rate calculation might not apply.

Pseudogenes are a recognized hazard to mitochondrial DNA analysis in general and DNA barcoding in particular [7,30–35]. Most can be recognized by the presence of stop codons, insertions, deletions, or extreme divergence. However, cases with full open reading frames are described, including some that differ minimally from the mitochondrial sequence [30]. To date, eight avian COI pseudogene sequences with open reading frames are reported [32,36]. When applied to the frequency matrix generated in this study, these contained 7–10 nucleotide and amino acid VLFs, strengthening the observation that pseudogenes can be identified by the presence of multiple VLFs. A similar approach, which measured deviation from a consensus sequence derived from a multi-species alignment, identified pseudogenes among a large family of human olfactory receptor genes and is the basis of a tree-building detection method using Pfam database alignments [37,38]. As an extension of the present analysis, it may be useful to catalog the substitutions found in pseudogenes as compared to those in species with shared VLFs. Two of the four species flagged in this study and six of seven species with published pseudogene

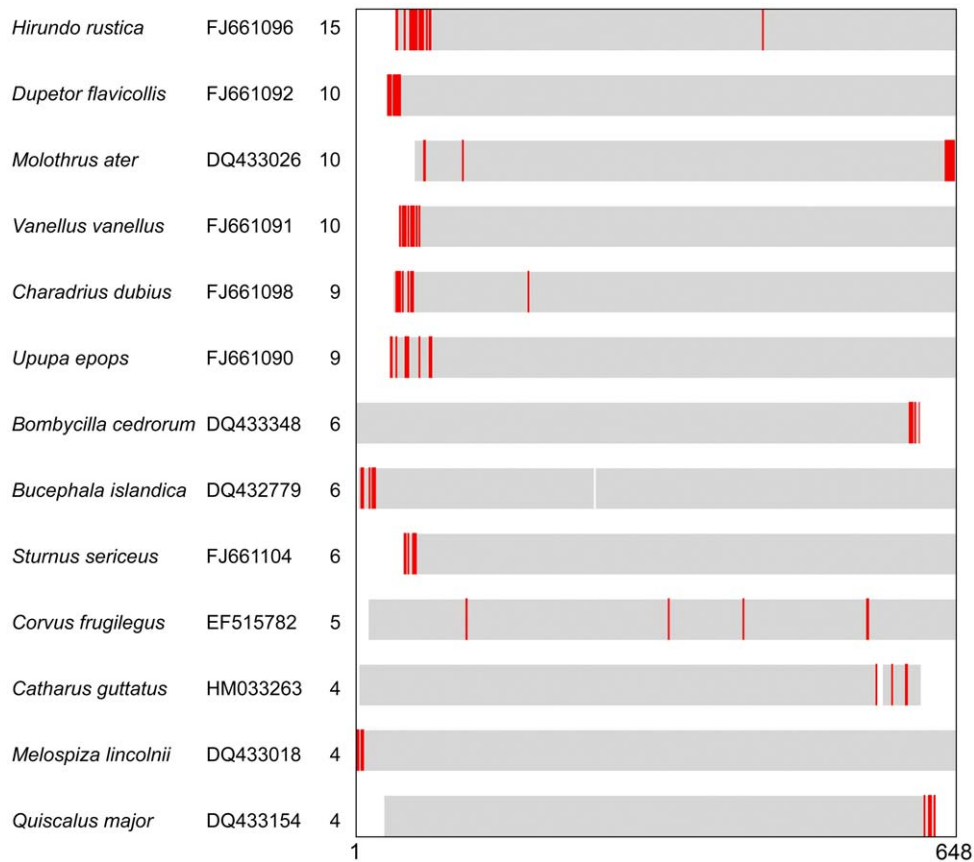

**Figure 7. BARCODEs with four or more nucleotide singleton VLFs. Species name, GenBank accession number, and number of VLFs are shown.** Gray bars indicate sequence alignment relative to 648 bp barcode region, VLFs are in red, and blanks indicate ambiguous positions. VLFs were concentrated at the 5' or 3' terminus, consistent with sequencing error, except for *C. frugilegus* EF515782, which appeared to be a pseudogene (Fig. S3).

doi:10.1371/journal.pone.0043992.g007

sequences are tyrannid flycatchers, which might reflect a limitation of standard barcode primers in this group. The publicly archived trace files demonstrated that co-amplification accounted for VLFs in pseudogene sequences, highlighting the importance of this component of the BARCODE data standard [4].

For sequences identified as pseudogenes there is enough evidence to justify revising the GenBank records including removal of the BARCODE keyword. For records containing probable sequencing errors, there is no established way to incorporate this sort of information. Annotating sequence files in GenBank or BOLD might be useful, particularly for those with multiple VLFs (Fig. 7). On a practical level, one or two errors in 648 bp barcode, equivalent to 0.15–0.30% K2P distance, are unlikely to result in an error in species identification given that most closely related animal species differ by 2% or more, although there are numerous exceptions to this rule including several among birds [6,8,39,40]. Even a much larger number of errors may not affect assignment unless they happen to involve diagnostic sites that differ among closely-related taxa. This supposition is supported by observation that BARCODEs with the largest number of probable errors (Fig. 7) nonetheless gave closest matches with >98% identity to conspecific sequences in GenBank using BLAST.

The finding that most very low frequency residues in this dataset are probable sequencing errors or contained in pseudogenes may be important for studies of rare variants, including population biology, RNA editing, and somatic mutation [41–45]. Errors in

cloned PCR products are known stumbling blocks; present results suggest this caution extends to directly sequenced products as well. Although the avian BARCODE data add to the observation that rare variants in animal mitochondrial DNA are largely missense substitutions, most of what appeared to be mutations were in fact errors, suggesting careful reexamination of prior studies [46–49]. A combined frequency matrix-spatial analysis approach may also be useful for evaluating newer technologies such as pyrosequencing which have the potential to generate enormous numbers of sequences. It is recently reported that up to 94% of putative RNA editing events reflect machine errors near the ends of pyrosequencing reads [50,51].

Our results strengthen the evidence for tight functional constraint on COI [52–55]. Most of the variation that does occur is limited to two nucleotides or amino acids at a position. We note that only eight amino acid positions differ in more than 5% of sequences in this dataset (Fig. 2). It may be of interest to determine whether these are associated with taxonomic groups or whether there is toggling back and forth which could underlie some of the difficulties in evolutionary inference using mitochondrial sequences [56]. There were about 60 species with one or two shared amino acid VLFs. These may represent taxa that are poorly represented in the dataset, sequencing errors shared among conspecifics, overlooked pseudogenes, or interesting exceptions harboring what otherwise appear to be prohibited variants.

As widely observed in protein coding genes in general and COI in particular, the degree of conservation differed by codon position, with 2<sup>nd</sup> > 1<sup>st</sup> >> 3<sup>rd</sup> [57,58]. For this dataset of 11,000 records, the calculated ratio of variance was 1: 11: 146. In addition to magnitude differences, the distribution of variation also differed among codon positions: strongly curved at 1<sup>st</sup> position and nearly linear at 3<sup>rd</sup> position (compare rank ordered panels in Fig. 2). Modeling might help understand how evolutionary diversification leads to different patterns of variance by codon position.

In this study we show that a frequency matrix can be applied to quantify errors in avian BARCODEs. We identified probable sequencing errors and pseudogenes, information that can be used to improve what is already a high quality database. To test whether this approach is useful for other barcode datasets, the analysis could be extended to fish (Actinopterygii: 20,000 BARCODEs, 3,500 species) and moths and butterflies (Lepidoptera: 170,000 BARCODEs, 21,000 species). In addition to evaluating BARCODEs, the frequency matrix approach described here may have general utility as a method for identifying errors and flagging pseudogenes in other large, multi-species sequence datasets containing highly conserved residues.

## Supporting Information

**Figure S1 Sliding window analysis (window = 30 nucleotides) of singleton and shared nucleotide VLFs in avian BARCODEs.**

(TIF)

**Figure S2 BOLD ID Tree for *Nothoprocta ornata* BARCODE JQ175578.** The query BARCODE with no VLFs shown

in red matches itself and five unpublished *N. ornata* records and is distant from the *N. ornata* BARCODEs with six VLFs.

(TIF)

**Figure S3 *Corvus frugilegus* BARCODE EF515782 is a pseudogene.** A) K2P NJ Tree for all GenBank *C. frugilegus* COI sequences, with BARCODE EF515782 highlighted in yellow and number of aaVLFs in parentheses. B) Trace files for *C. frugilegus* BARCODE EF515782 showing double peaks underlying VLF sites highlighted in yellow.

(TIF)

**Dataset S1 Aligned nucleotide sequences of avian BARCODEs in fas format.**

(FAS)

**Dataset S2 Nucleotide and amino acid frequency matrices and modal sequences generated from avian BARCODE dataset.**

(XLSX)

## Acknowledgments

We thank Jesse Ausubel and an anonymous reviewer for helpful comments. This work was made possible by Consortium for the Barcode of Life (CBOL) and International Barcode of Life (iBOL).

## Author Contributions

Conceived and designed the experiments: MYS. Performed the experiments: MYS. Analyzed the data: MYS KCRK. Contributed reagents/materials/analysis tools: MYS KCRK. Wrote the paper: MYS KCRK.

## References

1. Hebert PDN, Cywinka A, Ball SL, de Waard JR (2003) Biological identifications through barcodes. *Proc R Soc London B* 270: 313–322.
2. Ratnasingham S, Hebert PDN (2007) BOLD: The Barcode of Life Data System. *Mol Ecol Notes* 7: 355–364.
3. Casiraghi M, Labra M, Ferri E, Galimberti A, De Mattia F (2010) DNA barcoding: a six-question tour to improve users' awareness about the method. *Brief Bioinform* 11: 440–453.
4. Consortium for the Barcode of Life Database Working Group (2009) Data standards for BARCODE records in INSDC (BRIs). Available: [http://www.barcoding.si.edu/pdf/dwg\\_data\\_standards-final.pdf](http://www.barcoding.si.edu/pdf/dwg_data_standards-final.pdf). Accessed: 2012 April 4.
5. Frézal L, Leblois R (2008) Four years of DNA barcoding: current advances and prospects. *Infect Genet Evol* 8: 727–736.
6. Jingo U, Kato T, Ito M (2011) Current progress in DNA barcoding and future implications for entomology. *Entomol Sci* 14: 107–124.
7. Moritz C, Cicero C (2004) DNA barcoding: promise and pitfalls. *PLoS Biol* 2: 1529–1531.
8. Dasmahapatra KK, Elias M, Hill RI, Hoffman JI, Mallet J (2009) Mitochondrial DNA barcoding detects some species that are real and some that are not. *Mol Ecol Res* 10: 264–273.
9. Aliabadian M, Kaboli M, Nijman V, Vences M (2009) Molecular identification of birds: performance of distance-based DNA barcoding in three genes to delimit parapatric species. *PLoS ONE* 4: e4119.
10. Baker AJ, Tavares ES, Elbourne R (2009) Countering criticisms of single mitochondrial gene barcoding in birds. *Mol Ecol Res* 9: 257–268.
11. Tavares ES, Goncalves P, Miyaki CY, Baker AJ (2011) DNA barcode detects high genetic structure within neotropical bird species. *PLoS ONE* 6: e28543.
12. Barraclough TG (2010) Evolving entities: towards a unified framework for understanding diversity at the species and higher levels. *Phil Trans R Soc Lond B* 365: 1801–1813.
13. Sirovich L, Stoeckle MY, Zhang Y (2010) A structural analysis of biodiversity. *PLoS ONE* 5: e2966.
14. Longo MD, O'Neill MJ, O'Neill RJ (2011) Abundant human DNA contamination identified in non-primate genome databases. *PLoS ONE* 6: e16410.
15. Vilgaly R (2003) Taxonomic misidentification in public DNA databases. *New Phytol* 160: 4–5.
16. Meier R, Shiyang K, Vaidya G, Ng PK (2006) DNA barcoding and taxonomy in Diptera: a tale of high intraspecific variability and low identification success. *Syst Biol* 55: 715–728.
17. Hebert PDN, Stoeckle MY, Zemlak TS, Francis CM (2004) Identification of birds through DNA barcodes. *PLOS Biol* 2: 1657–1663.
18. Kerr KCR, Stoeckle MY, Dove CJ, Weigt LA, Francis CM, et al. (2007) Comprehensive DNA barcode coverage of North American birds. *Mol Ecol Notes* 7: 535–543.
19. Kerr KCR, Birks SM, Kalyakin MV, Red'kin YA, Koblik EA, et al. (2009) Filling the gap – COI barcode resolution in eastern Palearctic birds. *Frontiers Zoology* 6: 29.
20. Kerr KCR, Litjmaer DA, Barreira AS, Hebert PDN, Tubaro PL (2009) Probing evolutionary patterns in Neotropical birds through DNA barcodes. *PLoS ONE* 4: e379.
21. Vilaça ST, Lacerda DR, Sari EHR, Santos FR (2006) DNA-based identification applied to Thamnophilidae (Passeriformes) species: the first barcodes of Neotropical birds. *Rev Bras Ornitol* 14: 7–13.
22. Yoo HS, Eah JY, Kim JS, Min MS, Paek WK, et al. (2006) DNA barcoding Korean birds. *Mol Cell* 22: 323–327.
23. Schindel DE, Stoeckle MY, Milensky CM, Trizna M, Schmidt BK, et al. (2011) Project Description: DNA Barcodes of Bird Species in the National Museum of Natural History, Smithsonian Institution, USA. *ZooKeys* 152: 87–91.
24. Johnsen A, Rindal E, Ericson PGP, Zuccon D, Kerr KCR, et al. (2010) DNA barcoding of Scandinavian birds reveals divergent lineages in trans-Atlantic species. *J Ornithol* 151: 565–578.
25. Kumar S, Tamura K, Nei M (2004) MEGA3: integrated software for molecular evolutionary genetics analysis and sequence alignment. *Brief Bioinform* 5: 150–163.
26. Edgar RC (2004) MUSCLE: multiple sequence alignment with high accuracy and high throughput. *Nucl Acids Res* 32: 1792–1797.
27. Proutski V, Holmes EC (1998) SWAN: a sliding window analysis of nucleotide sequence variability. *Bioinformatics* 14: 467–468.
28. Cha RS, Thilly WG (1993) Specificity, efficiency, and fidelity of PCR. *PCR Method Appl* 3: S18–S29.
29. Frey JE, Frey B (2004) Origin of intra-individual variation in PCR-amplified mitochondrial cytochrome oxidase I of *Thrips tabaci* (Thysanoptera: Thripidae): mitochondrial heteroplasmy or nuclear integration. *Hereditas* 140: 92–98.
30. Song H, Buhay JE, Whiting MF, Crandall KA (2008) Many species in one: DNA barcoding overestimates the number of species when nuclear mitochondrial pseudogenes are coamplified. *Proc Natl Acad Sci U S A* 105: 13486–13491.
31. Dunshea G, Barros NB, Wells RS, Gales NJ, Hindell MA, et al. (2008) Pseudogenes and DNA-based diet analyses: a cautionary tale from a relatively well sampled predator-prey system. *Bull Entomol Res* 98: 239–248.



32. Sorenson MD, Quinn TW (1998) Numts: a challenge for avian systematics and population biology. *Auk* 115: 214–221.
33. Mirol PM, Mascheretti S, Searle JB (1999) Multiple nuclear pseudogenes of mitochondrial cytochrome *b* in *Ctenomys* (Caviomorpha, Rodentia) with either great similarity to or high divergence from the true mitochondrial sequence. *Heredity* 84: 538–547.
34. Ramos A, Barbena E, Mateiu L, González MM, Mairal Q, et al. (2011) Nuclear insertions of mitochondrial origin: database updating and usefulness in cancer studies. *Mitochondrion* 11: 946–953.
35. Dubey S, Michaux, Brunner H, Hütterer, Vogel P (2009) False phylogenies on wood mice due to cryptic cytochrome-*b* pseudogene. *Mol Phylogenet Evol* 50: 633–641.
36. Kerr KCR (2010) A cryptic, intergeneric cytochrome *c* oxidase I pseudogene in tyrant flycatchers (family: Tyrannidae). *Genome* 53: 1103–1109.
37. Menashe I, Aloni R, Lancet D (2006) A probabilistic classifier for olfactory receptor pseudogenes. *BMC Bioinformatics* 7: 393.
38. Coin L, Durbin R (2004) Improved techniques for the identification of pseudogenes. *Bioinformatics* 20 (suppl 1): i94–i100.
39. Campagna L, Geale K, Handford P, Lijtmaer DA, Tubaro PL (2011) A molecular phylogeny of the Sierra-Finches (*Phrygilus*, Passeriformes): extreme polyphyly in a group of Andean specialists. *Mol Phylogenet Evol* 61: 521–533.
40. Kwon YS, Kim JH, Choe JC, Park YC (2012) Low resolution of mitochondrial COI barcodes for identifying species of the genus *Larus* (Charadriiformes: Laridae). *Mitochondrial DNA* 2012 March 13.
41. Kraytberg Y, Khrapko K (2005) Single-molecule PCR: an artifact-free PCR approach for the analysis of somatic mutations. *Exper Rev Mol Diagnostics* 5: 1–7.
42. Dawson K, Thorpe RS, Malhotra A (2010) Estimating genetic variability in non-model taxa: a general procedure for discriminating sequence errors from actual variation. *PLoS ONE* 5: e15204.
43. Kobayashi N, Tamura K, Aotsuka T (1999) PCR error and population genetics. *Biochem Genet* 37: 317–321.
44. Cummings SM, McMullan M, Joyce DA, van Oosterhout C (2010) Solutions for PCR, cloning, and sequencing errors in population genetic analysis. *Conserv Genet* 11: 1095–1097.
45. Li M, Wang IX, Li Y, Bruzel A, Richards AL, et al. (2011) Widespread RNA and DNA sequence differences in the human transcriptome. *Science* 333: 53–58.
46. Moilanen JS, Majamaa K (2003) Phylogenetic network and physicochemical properties of nonsynonymous mutations in the protein-coding genes of human mitochondrial DNA. *Mol Biol Evol* 20: 1195–1210.
47. Hasegawa M, Cao Y, Yang ZH (1998) Preponderance of slightly deleterious polymorphism in mitochondrial DNA: nonsynonymous/synonymous rate ratio is much higher within species than between species. *Mol Biol Evol* 15: 1499.
48. Fry AJ (1999) Mildly deleterious mutations in avian mitochondrial DNA: evidence from neutrality tests. *Evolution* 53: 1617–1620.
49. Rand DM, Kann LM (1996) Excess amino acid polymorphism in mitochondrial DNA: contrasts among genes from *Drosophila*, mice, and humans. *Mol Biol Evol* 13: 735–748.
50. Kleinman CL, Majewski J (2012) Comment on “Widespread RNA and DNA sequence differences in the human transcriptome” *Science* 335: 1302.
51. Hayden EC (2012) RNA editing under intense scrutiny. *Nature News* March 15, 2012.
52. Abramson J, Svensson-Ek M, Byrne B, Iwata S (2001) Structure of cytochrome *c* oxidase: a comparison of the bacterial and mitochondrial enzymes. *Biochimica Biophysica Acta* 11544: 1–9.
53. Michel H, Behr J, Harrenga A, Kannt A (1998) Cytochrome *c* oxidase: structure and spectroscopy. *Ann Rev Biophysic Biomol Struct* 27: 329–356.
54. Tsukihara T, Aoyama H, Yamashita E, Tomizaki T, Yamaguchi H, et al. (1996) The whole structure of the 13-subunit oxidized cytochrome *c* oxidase at 2.8 angstrom. *Science* 272: 1136–1144.
55. Oshikawa S (2003) A cytochrome *c* oxidase proton pumping mechanism that excludes the O<sub>2</sub> reduction site. *FEBS Lett* 555: 8–12.
56. Blouin MS, Yowell CA, Courtney CH, Dame JB (1998) Substitution bias, rapid saturation, and the use of mtDNA for nematode systematics. *Mol Biol Evol* 15: 1719–1727.
57. Ward RD, Holmes BH (2007) An analysis of nucleotide and amino acid variability in the barcode region of cytochrome *c* oxidase I (cox1) in fishes. *Mol Ecol Notes* 7: 899–907.
58. Kerr KCR (2011) Searching for evidence of selection in avian DNA barcodes. *Mol Ecol Res* 11: 1045–1055.
