# Supplementary material for: Frequency Matrix Approach Demonstrates High Sequence Quality in Avian BARCODEs and Highlights Cryptic Pseudogenes
Source: PLoS One. 2012 Aug 27;7(8):e43992. doi: 10.1371/journal.pone.0043992 (PMC3428349; doi:10.1371/journal.pone.0043992)
Supplement: Dataset S1 — Aligned nucleotide sequences of avian BARCODES in fas format. (FAS) [file pone.0043992.s004.fas]

>gi|292390286|gb|GU571983.1|_Motacilla_alba_voucher_BISE-Aves23_cytochrome_oxidase_subunit_1_(COI)_gene_partial_cds_mitochondrial
------CTAATTTTTGGCGCATGAGCCGGAATAGTAGGTACCGCCCTAAGCCTCCTTATTCGAGCAGAGCTAGGTCAACCCGGAGCCCTCCTAGGAGACGACCAAGTCTACAATGTAGTCGTCACTGCTCATGCTTTCGTAATAATCTTCTTCATAGTCATGCCCATCATAATTGGGGGATTCGGAAACTGACTAGTTCCCCTAATAATCGGAGCTCCAGACATAGCATTCCCCCGAATAAACAACATAAGTTTCTGACTACTGCCCCCATCCTTCCTCCTCCTACTAGCATCATCTACAGTTGAAGCAGGAGCAGGCACAGGCTGAACCGTGTACCCCCCGCTAGCCGGCAACCTAGCCCACGCCGGAGCTTCAGTCGACCTGGCAATTTTCTCCCTACACCTAGCCGGTATCTCTTCAATCCTAGGTGCAATCAACTTCATTACAACAGCAATCAACATAAAACCTCCTGCCCTCTCACAATATCAAACCCCACTATTCGTTTGATCAGTCCTAATCACCGCAGTCCTACTGCTACTCTCTCTGCCAGTACTAGCTGCCGGTATCACAATACTCCTCACAGACCGTAACCTCAACACTACATTCTTTGATCCTGCAGGAGGAGGAGACCCTGTTTTATACCAACAC
>gi|292390234|gb|GU571957.1|_Lophophanes_cristatus_voucher_BISE-Aves105_cytochrome_oxidase_subunit_1_(COI)_gene_partial_cds_mitochondrial
------------TTCGGCGCATGAGCCGGAATAGTGGGAACAGCCCTGAGCCTCCTCATTCGTGCAGAACTAGGCCAACCCGGCGCCCTCCTTGGAGACGACCAGATCTACAACGTGGTCGTCACAGCCCATGCCTTCGTAATAATCTTCTTCATGGTCATGCCAATCATAATCGGGGGATTTGGGAACTGACTAGTCCCCCTAATAATCGGAGCCCCTGACATAGCATTCCCTCGAATAAACAACATAAGCTTCTGACTCCTACCCCCCTCCTTCCTCCTCCTACTAGCCTCCTCTACCGTGGAAGCAGGCGCAGGTACAGGATGAACAGTATACCCCCCCCTAGCCGGCAACCTGGCCCACGCCGGAGCATCAGTAGACCTGGCCATCTTCTCCCTCCACTTAGCAGGTATCTCCTCAATCCTAGGAGCAATCAACTTCATCACAACCGCAATCAACATAAAACCGCCTGCCCTTTCACAATACCAAACCCCTCTATTCGTCTGATCCGTACTAATCACCGCAGTACTCCTACTGCTCTCACTCCCAGTCCTCGCCGCCGGCATCACCATGCTCCTCACTGATCGCAACCTCAACACCACCTTCTTCGACCCCGCCGGAGGAGGAGACCCAGTGCTCTACCAACAC
>gi|292390082|gb|GU571881.1|_Falco_peregrinus_voucher_BISE-Aves172_cytochrome_oxidase_subunit_1_(COI)_gene_partial_cds_mitochondrial
------CTACTCTTCGGAGCATGAGCAGGCATAGTCGGTACTGCCCTTAGCCTCCTTATTCGAACAGAACTTGGCCAACCAGGAACTCTCCTAGGAGATGACCAAATCTACAATGTCATCGTCACTGCCCATGCCTTCGTAATAATCTTTTTCATAGTTATACCCATTATGATCGGAGGATTTGGAAACTGACTAGTTCCCCTTATAATTGGAGCTCCAGACATAGCATTTCCCCGCATAAACAACATGAGTTTCTGACTACTCCCCCCATCCTTTCTACTGCTCCTAGCATCTTCCACAGTAGAAGCTGGAGTTGGAACAGGATGAACCGTATACCCCCCCTTAGCAGGCAACCTAGCCCACGCCGGTGCTTCAGTAGACCTGGCTATCTTCTCCCTACACCTTGCAGGTGTATCTTCCATCTTAGGGGCAATCAACTTTATCACAACAGCCATTAACATAAAACCACCCGCCCTATCACAGTACCAAACCCCACTATTCGTATGATCCGTACTTATTACCGCCGTACTCCTACTGCTCTCACTTCCAGTTCTGGCCGCTGGCATCACCATACTACTAACCGACCGAAACCTGAACACTACATTCTTCGACCCCGCCGGAGGGGGAGACCCTATTCTCTATCAACAC
>gi|292389764|gb|GU571722.1|_Anas_platyrhynchos_voucher_BISE-Aves208_cytochrome_oxidase_subunit_1_(COI)_gene_partial_cds_mitochondrial
------CTTATCTTCGGGGCATGAGCCGGAATAATTGGCACAGCACTCAGCCTACTGATCCGGGCAGAACTAGGCCAGCCAGGGACCCTCCTGGGCGACGACCAAATTTATAACGTGATCGTCACCGCTCACGCCTTCGTAATAATCTTCTTCATGGTAATGCCCATCATAATTGGAGGGTTCGGCAACTGATTGGTCCCCCTGATAATCGGTGCCCCCGACATAGCATTCCCACGAATAAACAACATAAGCTTCTGACTCCTCCCACCATCATTCCTCCTTCTACTCGCCTCATCCACTGTAGAAGCTGGCGCTGGTACGGGTTGAACCGTATACCCACCTCTAGCAGGCAACCTAGCCCACGCCGGAGCCTCAGTGGACCTGGCTATCTTCTCACTTCACCTGGCTGGTGTCTCCTCCATCCTCGGAGCCATTAACTTCATTACCACAGCCATCAACATAAAACCCCCCGCACTCTCACAATACCAAACCCCACTTTTCGTCTGATCAGTCCTAATTACCGCCATCCTGCTCCTCCTATCACTCCCCGTCCTCGCCGCCGGCATCACAATGCTACTAACCGACCGAAACCTAAACACCACATTCTTTGATCCTGCCGGAGGGGGAGACCCAATCCTGTACCAACAC
>gi|292389736|gb|GU571708.1|_Alca_torda_voucher_BISE-Aves110_cytochrome_oxidase_subunit_1_(COI)_gene_partial_cds_mitochondrial
-------TGATCTTTGGCGCATGAGCCGGCATAGTTGGTACTGCCCTAAGCCTACTTATCCGCGCAGAACTAGGCCAACCAGGGACCCTCCTAGGAGACGACCAAATCTACAACGTAATCGTCACCGCCCATGCCTTCGTAATAATCTTCTTCATAGTTATGCCAATCATAATCGGCGGCTTCGGAAACTGATTAGTCCCACTTATAATCGGTGCACCCGACATAGCATTTCCTCGCATAAACAACATAAGCTTCTGACTACTACCCCCATCATTCTTACTCCTTCTAGCCTCATCTACAGTAGAAGCTGGAGCTGGTACAGGATGAACTGTTTACCCTCCCCTAGCTGGCAACCTAGCCCATGCCGGAGCTTCAGTAGATCTAGCAATCTTCTCCCTCCACTTAGCAGGTGTATCCTCCATCCTAGGTGCTATCAACTTTATCACAACAGCCATCAATATAAAACCCCCAGCCCTTTCACAGTACCAAACCCCATTATTCGTATGATCAGTACTTATCACTGCTGTCTTACTACTTCTCTCACTTCCAGTACTCGCCGCTGGCATTACCATGCTACTAACAGACCGAAACCTAAACACCACATTCTTCGATCCAGCCGGAGGCGGCGATCCAGTACTATACCAACAC
>gi|292389294|gb|GU571487.1|_Motacilla_alba_voucher_NHMO-BC264_cytochrome_oxidase_subunit_1_(COI)_gene_partial_cds_mitochondrial
CTATACCTAATTTTTGGCGCATGAGCCGGAATAGTAGGTACCGCCCTAAGCCTCCTTATTCGAGCAGAGCTAGGTCAACCCGGAGCCCTCCTAGGAGACGACCAAGTCTACAATGTAGTCGTCACTGCTCATGCTTTCGTAATAATCTTCTTCATAGTCATGCCCATCATAATTGGGGGATTCGGAAACTGACTAGTTCCCCTAATAATCGGAGCTCCAGACATAGCATTCCCCCGAATAAACAACATAAGTTTCTGACTACTGCCCCCATCCTTCCTCCTCCTACTAGCATCATCTACAGTTGAAGCAGGAGCAGGCACAGGCTGAACCGTGTACCCCCCGCTAGCCGGCAACCTAGCCCACGCCGGAGCTTCAGTCGACCTGGCAATTTTCTCCCTACACCTAGCCGGTATCTCTTCAATCCTAGGTGCAATCAACTTCATTACAACAGCAATCAACATAAAACCTCCTGCCCTCTCACAATATCAAACCCCACTATTCGTTTGATCAGTCCTAATCACCGCAGTCCTACTGCTACTCTCTCTGCCAGTACTAGCTGCCGGTATCACAATACTCCTCACAGACCGTAACCTCAACACTACATTCTTTGATCCTGCAGGAGGAGGAGACCCTGTTTTATACCAACAC
>gi|292389246|gb|GU571463.1|_Lophophanes_cristatus_voucher_NHMO-BC423_cytochrome_oxidase_subunit_1_(COI)_gene_partial_cds_mitochondrial
---------------------------------------------------------------------CTAGGCCAACCCGGCGCCCTCCTTGGAGACGACCAGATCTACAACGTGGTCGTCACAGCCCATGCCTTCGTAATAATCTTCTTCATGGTCATGCCAATCATAATCGGGGGATTTGGGAACTGACTAGTCCCCCTAATAATCGGAGCCCCTGACATAGCATTCCCTCGAATAAACAACATAAGCTTCTGACTCCTACCCCCCTCCTTCCTCCTCCTACTAGCCTCCTCTACCGTGGAAGCAGGCGCAGGTACAGGATGAACAGTATACCCCCCCCTAGCCGGCAACCTGGCCCACGCCGGAGCATCAGTAGACCTGGCCATCTTCTCCCTCCACTTAGCAGGTATCTCCTCAATCCTAGGAGCAATCAACTTCATCACAACCGCAATCAACATAAAACCGCCTGCCCTTTCACAATACCAAACCCCTCTATTCGTCTGATCCGTACTAATCACCGCAGTACTCCTACTGCTCTCACTCCCAGTCCTCGCCGCCGGCATCACCATGCTCCTCACTGATCGCAACCTCAACACCACCTTCTTCGACCCCGCCGGAGGAGGAGACCCAGTGCTCTACCAACAC
>gi|292389096|gb|GU571388.1|_Falco_peregrinus_voucher_NHMO-BC497_cytochrome_oxidase_subunit_1_(COI)_gene_partial_cds_mitochondrial
CTATACCTACTCTTCGGAGCATGAGCAGGCATAGTCGGTACTGCCCTTAGCCTCCTTATTCGAACAGAACTTGGCCAACCAGGAACTCTCCTAGGAGATGACCAAATCTACCATGTCATCGTCACTGCCCATGCCTTCGTAATAATCTTTTTCATAGTTATACCCATTATGATCGGAGGATTTGGAAACTGACTAGTTCCCCTTATAATTGGAGCTCCAGACATAGCATTTCCCCGCATAAACAACATGAGTTTCTGACTACTCCCCCCATCCTTTCTACTGCTCCTAGCATCTTCCACAGTAGAAGCTGGAGTTGGAACAGGATGAACCGTATACCCCCCCTTAGCAGGCAACCTAGCCCACGCCGGTGCTTCAGTAGACCTGGCTATCTTCTCCCTACACCTTGCAGGTGTATCTTCCATCTTAGGGGCAATCAACTTTATCACAACAGCCATTAACATAAAACCACCCGCCCTATCACAGTACCAAACCCCACTATTCGTATGATCCGTACTTATTACCGCCGTACTCCTACTGCTCTCACTTCCAGTTCTGGCCGCTGGCATCACCATACTACTAACCGACCGAAACCTGAACACTACATTCTTCGACCCCGCCGGAGGGGGAGACCCTATTCTCTATCAACAC
>gi|292388802|gb|GU571241.1|_Anas_platyrhynchos_voucher_NHMO-BC400_cytochrome_oxidase_subunit_1_(COI)_gene_partial_cds_mitochondrial
-------TTATCTTCGGGGCATGAGCCGGAATAATTGGCACAGCACTCAGCCTACTGATCCGGGCAGAACTAGGCCAGCCAGGGACCCTCCTGGGCGACGACCAAATTTATAACGTGATCGTCACCGCTCACGCCTTCGTAATAATCTTCTTCATGGTAATGCCCATCATAATTGGAGGGTTCGGCAACTGATTGGTCCCCCTGATAATCGGTGCCCCCGACATAGCATTCCCACGAATAAACAACATAAGCTTCTGACTCCTCCCACCATCATTCCTCCTTCTACTCGCCTCATCCACTGTAGAAGCTGGCGCTGGTACGGGTTGAACCGTATACCCACCTCTAGCAGGCAACCTAGCCCACGCCGGAGCCTCAGTGGACCTGGCTATCTTCTCACTTCACCTGGCTGGTGTCTCCTCCATCCTCGGAGCCATTAACTTCATTACCACAGCCATCAACATAAAACCCCCCGCACTCTCACAATACCAAACCCCACTTTTCGTCTGATCAGTCCTAATTACCGCCATCCTGCTCCTCCTATCACTCCCCGTCCTCGCCGCCGGCATCACAATGCTACTAACCGACCGAAACCTAAACACCACATTCTTTGATCCTGCCGGAGGGGGAGACCCAATCCTGTACCAACAC
>gi|292388782|gb|GU571231.1|_Alca_torda_voucher_NHMO-BC119_cytochrome_oxidase_subunit_1_(COI)_gene_partial_cds_mitochondrial
CTGTATCTGATCTTTGGCGCATGAGCCGGCATAGTTGGTACTGCCCTAAGCCTACTTATCCGCGCAGAACTAGGCCAACCAGGGACCCTCCTAGGAGACGACCAAATCTACAACGTAATCGTCACCGCCCATGCCTTCGTAATAATCTTCTTCATAGTTATGCCAATCATAATCGGCGGCTTCGGAAACTGATTAGTCCCACTTATAATCGGTGCACCCGACATAGCATTTCCTCGCATAAACAACATAAGCTTCTGACTACTACCCCCATCATTCTTACTCCTTCTAGCCTCATCTACAGTAGAAGCTGGAGCTGGTACAGGATGAACTGTTTACCCTCCCCTAGCTGGCAACCTAGCCCATGCCGGAGCTTCAGTAGATCTAGCAATCTTCTCTCTCCACTTAGCAGGTGTATCCTCCATCCTAGGTGCTATCAACTTTATCACAACAGCCATCAATATAAAACCCCCAGCCCTTTCACAGTACCAAACCCCATTATTCGTATGATCAGTACTTATCACTGCTGTCTTACTACTTCTCTCACTTCCAGTACTCGCCGCTGGCATTACCATGCTACTAACAGACCGAAACCTAAACACCACATTCTTCGATCCAGCCGGAGGCGGCGATCCAGTACTATACCAACAC
>gi|257155415|gb|GQ482190.1|_Motacilla_alba_voucher_ZMMU_RYA_1653_cytochrome_oxidase_subunit_1_(COI)_gene_partial_cds_mitochondrial
CTATACCTAATTTTTGGCGCATGAGCCGGAATAGTAGGTACCGCCCTAAGCCTCCTTATTCGAGCAGAGCTAGGTCAACCCGGAGCCCTCCTAGGAGACGACCAAGTCTACAATGTAGTCGTCACTGCTCATGCTTTCGTAATAATCTTCTTCATAGTCATGCCCATCATAATTGGGGGATTCGGAAACTGACTAGTTCCCCTAATAATCGGAGCTCCAGACATAGCATTCCCCCGAATAAACAACATAAGTTTCTGACTACTGCCCCCATCCTTCCTCCTCCTACTAGCATCATCTACAGTTGAAGCAGGAGCAGGCACAGGCTGAACCGTGTACCCCCCGCTAGCCGGCAACCTAGCCCACGCCGGAGCTTCAGTCGACCTGGCAATTTTCTCCCTACACCTAGCCGGTATCTCTTCAATCCTAGGTGCAATCAACTTCATTACAACAGCAATCAACATAAAACCTCCTGCCCTCTCACAATATCAAACCCCACTATTCGTTTGATCAGTCCTAATCACCGCAGTCCTACTGCTACTCTCTCTGCCAGTACTAGCTGCCGGTATCACAATACTCCTCACAGACCGTAACCTCAACACTACATTCTTTGATCCTGCAGGAGGAGGAGACCCTGTTTTATACCAACAC
>gi|257155411|gb|GQ482188.1|_Motacilla_alba_voucher_ZMMU_RYA_1635_cytochrome_oxidase_subunit_1_(COI)_gene_partial_cds_mitochondrial
CTATACCTAATTTTTGGCGCATGAGCCGGAATAGTAGGTACCGCCCTAAGCCTCCTTATTCGAGCAGAGCTAGGTCAACCCGGAGCCCTCCTAGGAGACGACCAAGTCTACAATGTAGTCGTCACTGCTCATGCTTTCGTAATAATCTTCTTCATAGTCATGCCCATCATAATTGGGGGATTCGGAAACTGACTAGTTCCCCTAATAATCGGAGCTCCAGACATAGCATTCCCCCGAATAAACAACATAAGTTTCTGACTACTGCCCCCATCCTTCCTCCTCCTACTAGCATCATCTACAGTTGAAGCAGGAGCAGGCACAGGCTGAACCGTGTACCCCCCGCTAGCCGGCAACCTAGCCCACGCCGGAGCTTCAGTCGACCTGGCAATTTTCTCCCTACACCTAGCCGGTATCTCTTCAATCCTAGGTGCAATCAACTTCATTACAACAGCAATCAACATAAAACCTCCTGCCCTCTCACAATATCAAACCCCACTATTCGTTTGATCAGTCCTAATCACCGCAGTCCTACTGCTACTCTCTCTGCCAGTACTAGCTGCCGGTATCACAATACTCCTCACAGACCGTAACCTCAACACTACATTCTTTGATCCTGCAGGAGGAGGAGACCCTGTTTTATACCAACAC
>gi|257155407|gb|GQ482186.1|_Motacilla_alba_voucher_UWBM_46419_cytochrome_oxidase_subunit_1_(COI)_gene_partial_cds_mitochondrial
CTATACCTAATTTTTGGCGCATGAGCCGGAATAGTAGGTACCGCCCTAAGCCTCCTTATTCGAGCAGAGCTAGGTCAACCCGGAGCCCTCCTAGGAGACGACCAAGTCTACAATGTAGTCGTCACTGCTCATGCTTTCGTAATAATCTTCTTCATAGTCATGCCCATCATAATTGGAGGATTCGGAAACTGACTAGTTCCCCTAATAATCGGAGCCCCAGACATAGCATTCCCCCGAATAAACAACATAAGTTTCTGACTACTGCCCCCATCCTTCCTCCTCCTACTAGCATCATCTACAGTTGAAGCAGGAGCAGGCACAGGCTGAACCGTGTACCCCCCGCTAGCCGGCAACCTAGCCCACGCTGGAGCTTCAGTCGACCTGGCAATTTTCTCCCTACACCTAGCCGGTATCTCTTCAATCCTAGGCGCAATCAACTTCATTACAACAGCAATCAACATAAAACCTCCTGCCCTCTCACAATATCAAACCCCACTATTCGTTTGATCAGTCCTAATCACCGCAGTCCTACTGCTACTCTCTCTGCCAGTACTAGCTGCCGGTATCACAATACTCCTCACAGACCGTAACCTCAACACTACATTCTTTGATCCTGCAGGAGGAGGAGACCCTGTTTTATACCAACAC
>gi|257155403|gb|GQ482184.1|_Motacilla_alba_voucher_UWBM_49525_cytochrome_oxidase_subunit_1_(COI)_gene_partial_cds_mitochondrial
CTATACCTAATTTTTGGCGCATGAGCCGGAATAGTAGGTACCGCCCTAAGCCTCCTTATTCGAGCAGAGCTAGGTCAACCCGGAGCCCTCCTAGGAGACGACCAAGTCTACAATGTAGTCGTCACTGCTCATGCTTTCGTAATAATCTTCTTCATAGTCATGCCCATCATAATTGGGGGATTCGGAAACTGACTAGTTCCCCTAATAATCGGAGCTCCAGACATAGCATTCCCCCGAATAAACAACATAAGTTTCTGACTACTGCCCCCATCCTTCCTCCTCCTACTAGCATCATCTACAGTTGAAGCAGGAGCAGGCACAGGCTGAACCGTGTACCCCCCGCTAGCCGGCAACCTAGCCCACGCCGGAGCTTCAGTCGACCTGGCAATTTTCTCCCTACACCTAGCCGGTATCTCTTCAATCCTAGGTGCAATCAACTTCATTACAACAGCAATCAACATAAAACCTCCTGCCCTCTCACAATATCAAACCCCACTATTCGTTTGATCAGTCCTAATCACCGCAGTCCTACTGCTACTCTCTCTGCCAGTACTAGCTGCCGGTATCACAATACTCCTCACAGACCGTAACCTCAACACTACATTCTTTGATCCTGCAGGAGGAGGAGACCCTGTTTTATACCAACAC
>gi|257155399|gb|GQ482182.1|_Motacilla_alba_voucher_UWBM_47243_cytochrome_oxidase_subunit_1_(COI)_gene_partial_cds_mitochondrial
CTATACCTAATTTTTGGCGCATGAGCCGGAATAGTAGGTACCGCCCTAAGCCTCCTTATTCGAGCAGAGCTAGGTCAACCCGGAGCCCTCCTAGGAGACGACCAAGTCTACAATGTAGTCGTCACTGCTCATGCTTTCGTAATAATCTTCTTCATAGTCATGCCCATCATAATTGGGGGATTCGGAAACTGACTAGTTCCCCTAATAATCGGAGCTCCAGACATAGCATTCCCCCGAATAAACAACATAAGTTTCTGACTACTGCCCCCATCCTTCCTCCTCCTACTAGCATCATCTACAGTTGAAGCAGGAGCAGGCACAGGCTGAACTGTGTACCCCCCGCTAGCCGGCAACCTAGCCCACGCCGGAGCTTCAGTCGACCTGGCAATTTTCTCCCTACACCTAGCCGGTATCTCTTCAATCCTAGGTGCAATCAACTTCATTACAACAGCAATCAACATAAAACCTCCTGCCCTCTCACAATATCAAACCCCACTATTCGTTTGATCAGTCCTAATCACCGCAGTCCTACTGCTACTCTCTCTGCCAGTACTAGCTGCCGGTATCACAATACTCCTCACAGACCGTAACCTCAACACTACATTCTTTGATCCTGCAGGAGGAGGAGACCCTGTTTTATACCAACAC
>gi|257155395|gb|GQ482180.1|_Motacilla_alba_voucher_UWBM_46962_cytochrome_oxidase_subunit_1_(COI)_gene_partial_cds_mitochondrial
CTATACCTAATTTTTGGCGCATGAGCCGGAATAGTAGGTACCGCCCTAAGCCTCCTTATTCGAGCAGAGCTAGGTCAACCCGGAGCCCTCCTAGGAGACGACCAAGTCTACAATGTAGTCGTCACTGCTCATGCTTTCGTAATAATCTTCTTCATAGTCATGCCCATCATAATTGGGGGATTCGGAAACTGACTAGTTCCCCTAATAATCGGAGCTCCAGACATAGCATTCCCCCGAATAAACAACATAAGTTTCTGACTACTGCCCCCATCCTTCCTCCTCCTACTAGCATCATCTACAGTTGAAGCAGGAGCAGGCACAGGCTGAACCGTGTACCCCCCGCTAGCCGGCAACCTAGCCCACGCCGGAGCTTCAGTCGACCTGGCAATTTTCTCCCTACACCTAGCCGGTATCTCTTCAATCCTAGGTGCAATCAACTTCATTACAACAGCAATCAACATAAAACCTCCTGCCCTCTCACAATATCAAACCCCACTATTCGTTTGATCAGTCCTAATCACCGCAGTCCTACTGCTACTCTCTCTGCCAGTACTAGCTGCCGGTATCACAATACTCCTCACAGACCGTAACCTCAACACTACATTCTTTGATCCTGCAGGAGGAGGAGACCCTGTTTTATACCAACAC
>gi|257155237|gb|GQ482101.1|_Lophophanes_cristatus_voucher_ZMMU_RYA_1427_cytochrome_oxidase_subunit_1_(COI)_gene_partial_cds_mitochondrial
CTCTATNTAATCTTCGGCGCATGAGCCGGAATAGTGGGAACAGCCCTGAGCCTCCTCATTCGTGCAGAACTCGGCCAACCCGGCGCCCTCCTTGGAGACGACCAGATCTACAACGTGGTCGTCACAGCCCATGCCTTCGTAATAATCTTCTTCATGGTCATGCCAATCATAATCGGGGGATTTGGGAACTGACTAGTCCCTCTAATAATCGGAGCCCCTGACATAGCATTCCCTCGAATAAACAACATAAGCTTCTGACTCCTACCCCCCTCCTTCCTCCTCCTACTAGCCTCCTCTACCGTGGAAGCAGGCGCAGGTACAGGATGAACAGTATACCCCCCCCTAGCCGGCAACCTGGCCCACGCCGGAGCATCAGTAGACCTGGCCATCTTCTCCCTCCACTTAGCAGGTATCTCCTCAATCCTAGGAGCAATCAACTTCATCACAACCGCAATCAACATAAAACCGCCTGCCCTTTCACAATACCAAACCCCTCTATTCGTCTGATCCGTACTAATCACCGCAGTACTCCTACTGCTCTCACTCCCAGTCCTCGCCGCCGGCATCACCATACTCCTCACTGATCGCAACCTCAACACCACCTTCTTCGACCCCGCCGGAGGAGGAGACCCAGTGCTCTACCAACAC
>gi|257155233|gb|GQ482099.1|_Lophophanes_cristatus_voucher_UWBM_57235_cytochrome_oxidase_subunit_1_(COI)_gene_partial_cds_mitochondrial
---------------GGCGCATGAGCCGGAATAGTGGGAACAGCCCTGAGCCTCCTCATTCGTGCAGAACTCGGCCAACCCGGCGCCCTCCTTGGAGACGACCAGATCTACAACGTGGTCGTCACAGCCCATGCCTTCGTAATAATCTTCTTCATGGTCATGCCAATCATAATCGGGGGATTTGGGAACTGACTAGTCCCTCTAATAATCGGAGCCCCTGACATAGCATTCCCTCGAATAAACAACATAAGCTTCTGACTCCTACCCCCCTCCTTCCTCCTCCTACTAGCCTCCTCTACCGTGGAAGCAGGCGCAGGTACAGGATGAACAGTATACCCCCCCCTAGCCGGCAACCTGGCCCACGCCGGAGCATCAGTAGACCTGGCCATCTTCTCCCTCCACTTAGCAGGTATCTCCTCAATCCTAGGAGCAATCAACTTCATCACAACCGCAATCAACATAAAACCGCCTGCCCTTTCACAATACCAAACCCCTCTATTCGTCTGATCCGTACTAATCACCGCAGTACTCCTACTGCTCTCACTCCCAGTCCTCGCCGCCGGCATCACCATACTCCTCACTGATCGCAACCTCAACACCACCTTCTTCGACCCCGCCGGAGGAGGAGACCCAGTGCTCTACCAACAC
>gi|197257461|gb|FJ028607.1|_Zonotrichia_capensis_voucher_MACN-Or-ct_3179_cytochrome_oxidase_subunit_1_(COI)_gene_partial_cds_mitochondrial
-------------TCGGCGCATGAGCCGGAATAGTGGGTACCGCCCTAAGCCTCCTCATTCGGGCAGAACTAGGCCAACCCGGAGCCCTTCTGGGAGACGACCAAGTCTACAACGTAATCGTCACAGCCCATGCCTTTGTAATAATCTTCTTCATAGTTATACCAATCATGATCGGAGGATTTGGAAACTGACTAGTCCCTCTAATAATCGGAGCCCCAGACATAGCATTCCCACGAATAAATAACATAAGCTTCTGACTACTCCCTCCATCCTTCCTCCTCCTCCTAGCATCTTCTACCGTCGAAGCAGGTGTCGGCACAGGCTGAACAGTATATCCCCCACTAGCAGGAAACCTAGCCCATGCTGGAGCCTCAGTCGACCTTGCAATTTTCTCCCTACATCTAGCCGGTATCTCCTCAATCCTAGGGGCTATCAACTTCATTACAACAGCAATCAACATAAAACCCCCTGCCCTTTCACAATACCAAACCCCCCTATTTGTATGATCAGTCTTAATCACTGCAGTTCTCCTACTCCTATCTCTTCCAGTCCTTGCCGCAGGAATCACAATACTCCTTACAGACCGAAACCTTAATACCACATTCTTCGACCCTGCCGGAGGAGGAGACCCCGTCCTATACCAACAC
>gi|197257457|gb|FJ028605.1|_Zonotrichia_capensis_voucher_MACN-Or-ct_051_cytochrome_oxidase_subunit_1_(COI)_gene_partial_cds_mitochondrial
CTTTACCTAATTTTCGGCGCATGAGCCGGAATAGTGGGTACCGCCCTAAGCCTCCTCATTCGGGCAGAACTAGGCCAACCCGGAGCCCTTCTGGGAGACGACCAAGTCTACAACGTAATCGTCACAGCCCATGCCTTTGTAATAATCTTCTTCATAGTTATACCAATCATGATCGGAGGATTTGGAAACTGACTAGTCCCTCTAATAATCGGAGCCCCAGACATAGCATTCCCACGAATAAATAACATAAGCTTCTGACTACTCCCTCCATCCTTCCTCCTCCTCCTAGCATCTTCTACCGTCGAAGCAGGTGTCGGCACAGGCTGAACAGTATATCCCCCACTAGCAGGAAACCTAGCCCATGCTGGAGCCTCAGTCGACCTTGCAATTTTCTCCCTACATCTAGCCGGTATCTCCTCAATCCTAGGGGCTATCAACTTCATTACAACAGCAATCAACATAAAACCCCCTGCCCTTTCACAATACCAAACCCCCCTATTTGTATGATCAGTCTTAATCACTGCAGTTCTCCTACTCCTATCTCTTCCAGTCCTTGCCGCAGGAATCACAATACTCCTTACAGACCGAAACCTTAATACCACATTCTTCGACCCTGCCGGAGGAGGAGACCCCGTCCTATACCAACAC
>gi|197257453|gb|FJ028603.1|_Zonotrichia_capensis_voucher_MACN-Or-ct_671_cytochrome_oxidase_subunit_1_(COI)_gene_partial_cds_mitochondrial
CTTTACCTAATTTTCGGCGCATGAGCCGGAATAGTGGGTACCGCCCTAAGCCTCCTCATTCGGGCAGAACTAGGCCAACCCGGAGCCCTTCTGGGAGACGACCAAGTCTACAACGTAGTCGTCACAGCCCATGCCTTTGTAATAATCTTCTTCATAGTTATACCAATCATGATCGGAGGATTTGGAAACTGACTAGTCCCTCTAATAATCGGAGCCCCAGACATAGCATTCCCACGAATAAATAACATAAGCTTCTGACTACTCCCTCCATCCTTCCTCCTCCTCCTAGCATCTTCTACCGTCGAAGCAGGTGTCGGCACAGGCTGAACAGTATATCCCCCACTAGCAGGAAACCTAGCCCATGCTGGAGCCTCAGTCGACCTTGCAATTTTCTCCCTACATCTAGCCGGTATCTCCTCAATCCTGGGGGCTATCAACTTCATTACAACAGCAATCAACATAAAACCCCCTGCCCTTTCACAATACCAAACCCCCCTATTTGTATGATCAGTCTTAATCACTGCAGTTCTCCTACTCCTATCTCTTCCAGTCCTTGCCGCAGGAATCACAATACTCCTTACAGACCGAAACCTTAATACCACATTCTTCGACCCTGCCGGAGGAGGAGACCCCGTCCTATACCAACAC
>gi|197257449|gb|FJ028601.1|_Zonotrichia_capensis_voucher_MACN-Or-ct_3166_cytochrome_oxidase_subunit_1_(COI)_gene_partial_cds_mitochondrial
CNTTACCTAATTTTCGGCGCATGAGCCGGAATAGTGGGTACCGCCCTAAGCCTCCTCATTCGGGCAGAACTAGGCCAACCCGGAGCCCTTCTGGGAGACGACCAAGTCTACAACGTAATCGTCACAGCCCATGCCTTTGTAATAATCTTCTTCATAGTTATACCAATCATGATCGGAGGATTTGGAAACTGACTAGTCCCTCTAATAATCGGAGCCCCAGACATAGCATTCCCACGAATAAATAACATAAGCTTCTGACTACTCCCTCCATCCTTCCTCCTCCTCCTAGCATCTTCTACCGTCGAAGCAGGTGTCGGCACAGGCTGAACAGTATATCCCCCACTAGCAGGAAACCTAGCCCATGCTGGAGCCTCAGTCGACCTTGCAATTTTCTCCCTACATCTAGCCGGTATCTCCTCAATCCTAGGGGCTATCAACTTCATTACAACAGCAATCAACATAAAACCCCCTGCCCTTTCACAATACCAAACCCCCCTATTTGTATGATCAGTCTTAATCACTGCAGTTCTCCTACTCCTATCTCTTCCAGTCCTTGCCGCAGGAATCACAATACTCCTTACAGACCGAAACCTTAATACCACATTCTTCGACCCTGCCGGAGGAGGAGACCCCGTCCTATACCAACAC
>gi|197257445|gb|FJ028599.1|_Zonotrichia_capensis_voucher_MACN-Or-ct_2757_cytochrome_oxidase_subunit_1_(COI)_gene_partial_cds_mitochondrial
CTTTACCTAATTTTCGGCGCATGAGCCGGAATAGTGGGTACCGCCCTAAGCCTCCTCATTCGGGCAGAACTAGGCCAACCCGGAGCCCTTCTGGGAGACGACCAAGTCTACAACGTAGTCGTCACAGCCCACGCCTTTGTAATAATCTTCTTCATAGTTATACCAATCATGATCGGAGGATTTGGAAACTGACTAGTCCCTCTAATAATCGGAGCCCCAGACATAGCATTCCCACGAATAAATAACATAAGCTTCTGACTACTCCCTCCATCCTTCCTCCTCCTCCTAGCATCTTCTACCGTCGAAGCAGGTGTCGGCACAGGCTGAACAGTATATCCCCCACTAGCAGGAAACCTAGCCCATGCTGGAGCCTCAGTCGACCTTGCAATTTTCTCCCTACATCTAGCCGGTATCTCCTCAATCCTGGGGGCTATCAACTTCATTACAACAGCAATCAACATAAAACCCCCTGCCCTTTCACAATACCAAACCCCCCTATTTGTATGATCAGTCTTAATCACTGCAGTTCTCCTACTCCTATCTCTTCCGGTCCTTGCCGCAGGAATCACAATACTCCTTACAGACCGAAACCTTAATACCACATTCTTCGACCCTGCCGGAGGAGGAGACCCCGTCCTATACCAACAC
>gi|197257441|gb|FJ028597.1|_Zenaida_auriculata_voucher_MACN-Or-ct_1549_cytochrome_oxidase_subunit_1_(COI)_gene_partial_cds_mitochondrial
CTATACCTAATCTTCGGTGCATGAGCTGGTATAGTTGGCACCGCACTTAGCCTCCTCATCCGTGCAGAACTCGGACAACCCGGTACCCTCCTAGGGGACGACCAAATCTATAATGTAGTAGTTACAGCCCATGCCTTCGTAATAATTTTCTTCATAGTTATGCCTATCATAATCGGAGGCTTCGGAAACTGACTAGTACCGCTCATAATCGGAGCCCCCGACATAGCATTCCCACGAATAAACAACATAAGCTTCTGACTACTGCCTCCATCCTTCCTCCTCCTCCTAGCATCCTCCACAGTTGAAGCCGGTGCGGGTACAGGATGAACCGTATACCCCCCACTAGCCGGTAACCTCGCCCACGCCGGAGCCTCCGTGGACTTGGCCATCTTCTCCCTCCATCTTGCAGGTGTTTCCTCCATCTTGGGGGCCATCAACTTTATTACAACGGCCATTAACATAAAACCTCCAGCCCTCTCACAATACCAAACCCCACTATTTGTATGATCGGTCCTCATCACCGCCGTTCTCCTCCTTCTATCCCTCCCAGTCCTCGCCGCCGGCATCACTATACTACTTACAGACCGAAACCTAAACACCACCTTCTTCGACCCCGCTGGTGGAGGCGACCCAGTACTATATCAACAC
>gi|197257437|gb|FJ028595.1|_Zenaida_auriculata_voucher_MACN-Or-ct_1522_cytochrome_oxidase_subunit_1_(COI)_gene_partial_cds_mitochondrial
CTATACCTAATCTTCGGTGCATGAGCTGGTATAGTTGGCACCGCACTTAGCCTCCTCATCCGTGCAGAACTCGGACAACCCGGTACCCTCCTAGGGGACGACCAAATCTATAATGTAGTAGTTACAGCCCATGCCTTCGTAATAATTTTCTTCATAGTTATGCCTATCATAATCGGAGGCTTCGGAAACTGACTAGTACCGCTCATAATCGGAGCCCCCGACATAGCATTCCCACGAATAAACAACATAAGCTTCTGACTACTGCCTCCATCCTTCCTCCTCCTCCTAGCATCCTCCACAGTTGAAGCCGGTGCGGGTACAGGATGAACCGTATACCCCCCACTAGCCGGTAACCTCGCCCACGCCGGAGCCTCCGTGGACTTGGCCATCTTCTCCCTCCATCTTGCAGGTGTTTCCTCCATCTTGGGGGCCATCAACTTTATTACAACGGCCATTAACATAAAACCTCCAGCCCTCTCACAATACCAAACCCCACTATTTGTATGATCGGTCCTCATCACCGCCGTTCTCCTCCTTCTATCCCTCCCAGTCCTCGCCGCCGGCATCACTATACTACTTACAGACCGAAACCTAAACACCACCTTCTTCGACCCCGCTGGTGGAGGCGACCCAGTACTATATCAACAC
>gi|197257433|gb|FJ028593.1|_Zenaida_auriculata_voucher_MACN-Or-ct_655_cytochrome_oxidase_subunit_1_(COI)_gene_partial_cds_mitochondrial
CTATACCTAATCTTCGGTGCATGAGCTGGTATAGTTGGCACCGCACTTAGCCTCCTCATCCGTGCAGAACTCGGACAACCCGGTACCCTCCTAGGGGACGACCAAATCTATAATGTAGTAGTTACAGCCCATGCCTTCGTAATAATTTTCTTCATAGTTATGCCTATCATAATCGGAGGCTTCGGAAACTGACTAGTACCGCTCATAATCGGAGCCCCCGACATAGCATTCCCACGAATAAACAACATAAGCTTCTGACTACTGCCTCCATCCTTCCTCCTCCTCCTAGCATCCTCCACAGTTGAAGCCGGTGCGGGTACAGGATGAACCGTATACCCCCCACTAGCCGGTAACCTCGCCCACGCCGGAGCCTCCGTGGACTTGGCCATCTTCTCCCTCCATCTTGCAGGTGTTTCCTCCATCTTGGGGGCCATCAACTTTATTACAACGGCCATTAACATAAAACCTCCAGCCCTCTCACAATACCAAACCCCACTATTTGTATGATCGGTCCTCATCACCGCCGTTCTCCTCCTTCTATCCCTCCCAGTCCTCGCCGCCGGCATCACTATACTACTTACAGACCGAAACCTAAACACCACCTTCTTCGACCCCGCTGGTGGAGGCGACCCAGTACTATATCAACAC
>gi|197257429|gb|FJ028591.1|_Zenaida_auriculata_voucher_MACN-Or-ct_398_cytochrome_oxidase_subunit_1_(COI)_gene_partial_cds_mitochondrial
CTATACCTAATCTTCGGTGCATGAGCTGGTATAGTTGGCACCGCACTTAGCCTCCTCATCCGTGCAGAACTCGGACAACCCGGTACCCTCCTAGGGGACGACCAAATCTATAATGTAGTAGTTACAGCCCATGCCTTCGTAATAATTTTCTTCATAGTTATGCCTATCATAATCGGAGGCTTCGGAAACTGACTAGTACCGCTCATAATCGGAGCCCCCGACATAGCATTCCCACGAATAAACAACATAAGCTTCTGACTACTGCCTCCATCCTTCCTCCTCCTCCTAGCATCCTCCACAGTTGAAGCCGGTGCGGGTACAGGATGAACCGTATACCCCCCACTAGCCGGTAACCTCGCCCACGCCGGAGCCTCCGTGGACTTGGCCATCTTCTCCCTCCATCTTGCAGGTGTTTCCTCCATCTTGGGGGCCATCAACTTTATTACAACGGCCATTAACATAAAACCTCCAGCCCTCTCACAATACCAAACCCCACTATTTGTATGATCGGTCCTCATCACCGCCGTTCTCCTCCTTCTATCCCTCCCAGTCCTCGCCGCCGGCATCACTATACTACTTACAGACCGAAACCTAAACACCACCTTCTTCGACCCCGCTGGTGGAGGCGACCCAGTACTATATCAACAC
>gi|197257425|gb|FJ028589.1|_Xolmis_rubetra_voucher_MACN-Or-ct_2826_cytochrome_oxidase_subunit_1_(COI)_gene_partial_cds_mitochondrial
TTATACCTAATTTTTGGTGCCTGGGCCGGAATGATTGGTACCGCCCTAAGCCTCCTTATTCGAGCAGAATTAGGACAACCAGGAACTCTCCTAGGGGACGACCAAATCTATAACGTAATCGTTACTGCTCATGCCTTCGTAATAATCTTCTTTATGGTGATGCCCATTATAATTGGAGGATTTGGTAACTGACTAGTCCCCCTAATAATCGGCGCTCCCGACATAGCATTCCCTCGTATAAACAACATAAGCTTCTGGCTACTGCCCCCATCATTTCTTCTCCTTCTAGCCTCTTCCACAGTTGAAGCTGGAGCAGGAACCGGATGAACTGTCTACCCACCATTAGCTGGTAACCTAGCACATGCCGGAGCTTCAGTAGACTTAGCCATCTTTTCCCTTCACCTAGCAGGTGTATCCTCAATTCTAGGTGCTATCAACTTCATTACTACTGCAATCAATATAAAACCACCAGCCCTTTCACAATACCAAACCCCCTTATTTGTGTGATCTGTCCTAATTACTGCAGTTCTCCTCCTCCTCTCCCTCCCAGTACTTGCTGCTGGCATCACCATACTACTTACAGACCGTAATCTTAACACTACATTCTTCGACCCTGCAGGCGGCGGAGATCCAGTTTTATACCAACAT
>gi|197257421|gb|FJ028587.1|_Xolmis_pyrope_voucher_MACN-Or-ct_2573_cytochrome_oxidase_subunit_1_(COI)_gene_partial_cds_mitochondrial
CNANACCTAATNTTCGGCGCCTGGGCCGGAATGATTGGTACCGCCCTAAGCCTCCTCATCCGAGCAGAACTAGGACAACCAGGAACTCTCCTAGGAGACGACCAAATCTATAATGTAATCGTTACTGCTCATGCCTTCGTAATAATCTTCTTTATAGTAATACCCATTATAATTGGAGGATTTGGCAACTGATTAGTCCCCCTAATAATTGGTGCCCCTGACATAGCATTCCCTCGTATAAACAACATAAGCTTCTGACTACTACCCCCATCATTCCTCCTCCTTCTAGCCTCCTCTACAGTTGAAGCTGGAGCAGGAACTGGATGAACTGTCTACCCACCATTAGCTGGCAACTTAGCACATGCCGGAGCCTCAGTAGACTTAGCTATCTTTTCTCTTCACCTTGCAGGTGTATCCTCAATTCTAGGGGCTATCAACTTCATCACCACTGCAATTAATATAAAACCACCGGCTCTGTCACAGTACCAGACCCCCCTATTTGTATGATCTGTATTAATTACTGCAGTTCTCCTTCTTCTTTCTCTCCCTGTACTTGCTGCCGGGATTACTATATTACTTACAGATCGTAATCTTAACACTACATTCTTCGACCCCGCAGGAGGCGGAGACCCAGTCTTATACCAACAT
>gi|197257417|gb|FJ028585.1|_Xolmis_irupero_voucher_MACN-Or-ct_1532_cytochrome_oxidase_subunit_1_(COI)_gene_partial_cds_mitochondrial
TTATATCTAATCTTTGGCGCCTGGGCCGGAATGATTGGTACCGCCCTAAGTCTCCTTATTCGAGCAGAACTAGGCCAACCAGGAACCCTCCTAGGAGACGATCAAATCTATAACGTAATTGTCACTGCTCATGCCTTCGTAATAATCTTCTTTATAGTTATACCCATTATAATTGGAGGATTTGGTAACTGATTAGTCCCCCTAATAATTGGTGCCCCCGACATAGCTTTCCCTCGCATAAACAATATAAGCTTCTGACTACTACCTCCATCATTCCTCCTCCTTCTAGCCTCATCCACAGTTGAAGCTGGGGCAGGAACCGGATGAACTGTTTATCCTCCACTAGCTGGCAACTTAGCACATGCCGGAGCTTCAGTAGACCTAGCCATCTTTTCTCTTCACCTTGCAGGGGTGTCTTCAATTCTAGGTGCTATTAACTTCATTACTACTGCAATTAACATAAAACCACCAGCCCTATCACAATATCAAACTCCCCTATTTGTATGATCCGTCCTAATTACTGCAGTTCTCCTCCTCCTCTCCCTTCCAGTACTCGCTGCTGGCATCACTATGCTTCTTACAGACCGAAACCTTAACACTACGTTCTTCGACCCTGCAGGAGGCGGAGATCCAGTCCTATACCAACAT
>gi|197257413|gb|FJ028583.1|_Xolmis_irupero_voucher_MACN-Or-ct_1827_cytochrome_oxidase_subunit_1_(COI)_gene_partial_cds_mitochondrial
----------------------------------------CCGCCCTAAGTCTCCTTATTCGAGCAGAACTAGGCCAACCAGGAACCCTCCTAGGAGACGATCAAATCTATAACGTAATTGTCACTGCTCATGCCTTCGTAATAATCTTCTTTATAGTTATACCCATTATAATTGGAGGATTTGGTAACTGATTAGTCCCCCTAATAATTGGTGCCCCCGACATAGCTTTCCCTCGCATAAACAATATAAGCTTCTGACTACTACCTCCATCATTCCTCCTCCTTCTAGCCTCATCCACAGTTGAAGCTGGGGCAGGAACCGGATGAACTGTTTATCCTCCACTAGCTGGCAACTTAGCGCATGCCGGAGCTTCAGTAGACCTAGCCATCTTTTCTCTTCACCTTGCAGGGGTGTCTTCAATCCTAGGTGCTATTAACTTCATTACTACTGCAATTAACATAAAACCACCAGCCCTATCACAATATCAAACTCCCCTATTTGTATGATCCGTCCTAATTACTGCAGTTCTCCTCCTCCTCTCCCTTCCAGTACTCGCTGCTGGCATCACTATGCTTCTTACAGACCGAAACCTTAACACTACGTTCTTCGACCCTGCAGGAGGCGGAGATCCAGTCCTATACCAACAT
>gi|197257409|gb|FJ028581.1|_Xolmis_coronatus_voucher_MACN-Or-ct_2782_cytochrome_oxidase_subunit_1_(COI)_gene_partial_cds_mitochondrial
CTATATCTAATCTTCGGCGCCTGGGCCGGAATGATTGGTACTGCCCTAAGCCTCCTTATTCGAGCAGAATTAGGACAACCAGGAACTCTCCTAGGAGATGATCAAATCTATAATGTCATCGTCACTGCTCATGCCTTCGTAATAATCTTCTTTATAGTAATGCCCATTATAATCGGAGGATTTGGTAACTGATTAGTCCCCCTAATAATTGGTGCCCCTGATATAGCATTCCCTCGTATAAACAACATAAGCTTCTGACTACTACCCCCATCATTCCTTCTCCTTCTAGCATCATCTACAATTGAAGCTGGAGCAGGAACTGGATGAACTGTCTATCCACCATTAGCTGGTAACCTAGCACATGCAGGAGCTTCAGTCGACCTAGCCATCTTTTCCCTTCACCTTGCAGGTGTATCTTCAATTCTGGGCGCTATCAACTTCATTACTACTGCAATTAATATAAAACCACCAGCCCTCTCACAATACCAAACCCCCCTATTTGTATGATCCGTCTTAATTACTGCAGTTCTCCTTCTCCTCTCCCTCCCAGTACTTGCTGCTGGCATTACTATACTTCTTACAGACCGTAATCTTAACACTACATTCTTCGATCCCGCAGGAGGTGGAGATCCAGTCTTATACCAGCAT
>gi|197257405|gb|FJ028579.1|_Xolmis_cinereus_voucher_MACN-Or-ct_2405_cytochrome_oxidase_subunit_1_(COI)_gene_partial_cds_mitochondrial
CTATATCTAATCTTTGGTGCCTGGGCCGGAATGATTGGTACCGCCCTAAGCCTCCTCATTCGAGCAGAACTAGGACAACCAGGAACTCTCCTAGGAGACGACCAAATCTATAATGTGATCGTTACTGCTCATGCCTTCGTAATAATCTTCTTTATAGTAATACCCATCATAATTGGAGGATTTGGCAACTGATTAGTTCCCCTAATAATCGGTGCCCCTGATATAGCATTCCCTCGTATAAACAACATAAGCTTCTGACTTCTACCTCCATCATTCCTTCTTCTTTTAGCCTCATCTACAGTTGAAGCCGGAGCAGGAACTGGATGAACTGTATATCCACCATTAGCCGGCAACTTAGCACATGCTGGAGCTTCAGTAGACTTAGCTATCTTTTCCCTTCACCTTGCAGGTGTATCTTCAATTCTAGGCGCTATCAACTTCATTACTACCGCAATTAATATAAAACCACCAGCCCTTTCACAATACCAAACCCCCCTATTTGTATGATCTGTCCTAATTACTGCAGTTCTCCTCCTCCTTTCTCTCCCAGTACTTGCTGCTGGCATCACCATACTACTTACAGACCGTAATCTTAACACTACATTCTTCGATCCCGCAGGAGGTGGAGATCCAGTTTTATACCAACAT
>gi|197257401|gb|FJ028577.1|_Xolmis_cinereus_voucher_MACN-Or-ct_1605_cytochrome_oxidase_subunit_1_(COI)_gene_partial_cds_mitochondrial
CTATATCTAATCTTTGGTGCCTGGGCCGGAATGATTGGTACCGCCCTAAGCCTCCTCATTCGAGCAGAACTAGGACAACCAGGAACTCTCCTAGGAGACGACCAAATCTATAATGTGATCGTTACTGCTCATGCCTTCGTAATAATCTTCTTTATAGTAATACCCATCATAATTGGAGGATTTGGCAACTGATTAGTTCCCCTAATAATCGGTGCCCCTGATATAGCATTCCCTCGTATAAACAACATAAGCTTCTGACTTCTACCTCCATCATTCCTTCTTCTTTTAGCCTCATCTACAGTTGAAGCCGGAGCAGGAACTGGATGAACTGTATATCCACCATTAGCCGGCAACTTAGCACATGCTGGAGCTTCAGTAGACTTAGCTATCTTTTCCCTTCACCTTGCAGGTGTATCTTCAATTCTAGGCGCTATCAACTTCATTACTACCGCAATTAATATAAAACCACCAGCCCTTTCACAATACCAAACCCCCCTATTTGTATGATCTGTCCTAATTACTGCAGTTCTCCTCCTCCTTTCTCTCCCGGTACTTGCTGCTGGCATCACCATACTACTTACAGACCGTAATCTTAACACTACATTCTTCGATCCCGCAGGAGGTGGAGATCCAGTTTTATACCAACAT
>gi|197257397|gb|FJ028575.1|_Xiphorhynchus_fuscus_voucher_MACN-Or-ct_2021_cytochrome_oxidase_subunit_1_(COI)_gene_partial_cds_mitochondrial
CTTTACCTAATCTTCGGAGCATGAGCTGGCATAATTGGAACCGCCCTAAGCCTCCTAATCCGAGCCGAACTCGGACAACCAGGTACCCTCCTGGGTGACGACCAAATTTATAATGTTATCGTCACTGCCCATGCTTTCGTGATAATTTTCTTTATAGTTATACCTATTATAATCGGAGGATTTGGCAACTGACTAGTCCCACTAATAATTGGAGCACCCGACATAGCATTTCCTCGAATAAATAACATAAGCTTCTGACTTCTTCCCCCCTCCTTCTTACTCCTCCTAGCTTCTTCTACAGTAGAAGCGGGCGCAGGTACAGGATGAACAGTATACCCACCCTTAGCAGGTAATCTAGCCCATGCAGGAGCCTCAGTAGACCTAGCTATTTTCTCCCTACACTTAGCTGGTGTATCATCTATTCTAGGAGCCATCAACTTCATCACAACTGCAATCAACATAAAACCACCAGCCCTCTCACAATATCAAACCCCCTTATTTGTCTGATCCGTCCTTATCACCGCTGTCCTCCTCCTTCTCTCCTTACCCGTACTAGCCGCTGGCATCACGATACTTCTAACAGACCGTAACCTAAATACCACATTCTTCGACCCAGCCGGAGGCGGAGATCCTATCCTATACCAACAC
>gi|197257393|gb|FJ028573.1|_Xiphocolaptes_major_voucher_MACN-Or-ct_3245_cytochrome_oxidase_subunit_1_(COI)_gene_partial_cds_mitochondrial
------------TTCGGAGCATGAGCTGGCATGATTGGAACTGCCTTAAGCCTCCTAATCCGAGCTGAACTCGGACAACCAGGCACTCTCCTGGGCGATGACCAAATTTATAATGTTATCGTCACTGCCCACGCCTTCGTAATAATCTTCTTTATAGTTATACCTATTATAATCGGAGGGTTCGGCAACTGACTAGTCCCATTAATAATTGGAGCCCCCGACATAGCATTCCCACGAATAAATAATATAAGTTTCTGACTTCTCCCACCATCCTTCCTGCTCCTTCTAGCCTCCTCTACAGTAGAAGCAGGGGCAGGAACAGGATGAACAGTATACCCACCCTTAGCAGGCAACCTAGCCCACGCAGGAGCCTCAGTAGATCTAGCTATTTTCTCCCTCCACCTAGCTGGCGTGTCTTCTATCCTAGGAGCCATCAACTTCATCACAACCGCAATCAACATAAAACCACCAGCCCTCTCACAATACCAAACCCCCTTATTTGTCTGATCAGTTCTCATTACTGCCGTCCTACTACTTCTCTCCTTACCCGTCCTAGCCGCCGGCATCACAATACTCCTAACAGATCGTAACCTAAACACCACATTCTTTGACCCAGCTGGAGGTGGAGACCCCATCCTATACCAACAC
>gi|197257389|gb|FJ028571.1|_Xiphocolaptes_major_voucher_MACN-Or-ct_793_cytochrome_oxidase_subunit_1_(COI)_gene_partial_cds_mitochondrial
CTCTACCTAATTTTCGGAGCATGAGCTGGCATGATTGGAACTGCCTTAAGCCTCCTAATCCGAGCTGAACTCGGACAACCAGGCACTCTCCTGGGCGATGACCAAATTTATAATGTTATCGTCACTGCCCACGCCTTCGTAATAATCTTCTTTATAGTTATACCTATTATAATCGGAGGGTTCGGCAACTGACTAGTCCCATTAATAATTGGAGCCCCCGACATAGCATTCCCACGAATAAATAATATAAGTTTCTGACTTCTCCCACCATCCTTCCTGCTCCTTCTAGCCTCCTCTACAGTAGAAGCAGGGGCAGGAACAGGATGAACAGTATACCCACCCTTAGCAGGCAACCTAGCCCACGCAGGAGCCTCAGTAGATCTAGCTATTTTCTCCCTCCACCTAGCTGGCGTGTCTTCTATCCTAGGAGCCATCAACTTCATCACAACCGCAATCAACATAAAACCACCAGCCCTCTCACAATACCAAACCCCCTTATTTGTCTGATCAGTTCTCATTACTGCCGTCCTACTACTTCTCTCCTTACCCGTCCTAGCCGCCGGCATCACAATACTCCTAACAGATCGTAACCTAAACACCACATTCTTTGACCCAGCTGGAGGTGGAGACCCCATCCTATACCAACAC
>gi|197257385|gb|FJ028569.1|_Xiphocolaptes_albicollis_voucher_MACN-Or-ct_2956_cytochrome_oxidase_subunit_1_(COI)_gene_partial_cds_mitochondrial
CTCTACCTAATTTTCGGAGCATGAGCTGGCATGATTGGAACCGCCCTAAGCCTCCTAATCCGAGCTGAACTTGGACAACCAGGCACTCTCCTGGGCGATGACCAAATTTATAATGTTATCGTCACTGCCCACGCCTTCGTAATAATCTTCTTTATAGTTATACCTATTATAATCGGAGGGTTCGGCAACTGACTAGTCCCATTGATAATCGGAGCCCCCGACATAGCATTCCCACGAATAAACAACATAAGTTTTTGACTTCTCCCACCATCCTTCCTGCTCCTCCTAGCCTCCTCTACAGTAGAAGCAGGGGCAGGAACAGGATGAACAGTATACCCACCCTTAGCAGGCAACCTAGCCCACGCAGGAGCCTCAGTAGATCTAGCTATTTTCTCCCTCCACCTAGCTGGTGTATCCTCTATCTTAGGGGCCATCAACTTCATCACAACCGCAGTCAACATAAAACCACCAGCCCTCTCACAATACCAAACCCCCTTATTTGTCTGATCAGTTCTCATTACTGCCGTCCTACTACTTCTCTCCTTACCCGTCCTAGCCGCCGGCATCACAATACTCCTAACAGATCGTAACCTAAACACCACATTCTTTGACCCCGCTGGAGGCGGAGATCCCATCCTATACCAACAC
>gi|197257381|gb|FJ028567.1|_Xenops_minutus_voucher_MACN-Or-ct_2060_cytochrome_oxidase_subunit_1_(COI)_gene_partial_cds_mitochondrial
CTTNNTCTAATTTTTGGAGCNTGAGCTGGTATAATTGGAACAGCCCTCAGCCTCCTAATCCGAGCTGAACTAGGACAGCCAGGTACTCTCCTAGGTGACGACCAAATTTATAATGTAATTGTCACCGCTCATGCTTTTGTCATAATCTTCTTTATAGTTATACCTATCATAATCGGCGGGTTTGGCAATTGACTAGTCCCACTAATAATTGGTGCCCCAGACATAGCATTCCCACGAATAAATAACATAAGCTTTTGACTCCTACCCCCATCTTTCTTACTTCTACTAGCCTCTTCAACAGTAGAAGCCGGCGCGGGGACGGGATGAACAGTTTATCCTCCCCTAGCAGGAAACCTAGCCCATGCTGGAGCTTCAGTAGACCTAGCTATCTTCTCTCTTCATTTAGCCGGTGTATCCTCCATTCTAGGAGCAATTAACTTCATTACAACCGCAATCAACATAAAACCCCCAGCCCTCTCCCAATACCAAACTCCCCTATTCGTATGATCAGTCCTTATCACTGCCGTCCTGCTTCTCCTATCTTTACCCGTTTTAGCCGCTGGTATCACAATACTACTTACAGACCGAAACCTAAATACCACATTTTTCGATCCAGCCGGAGGCGGAGACCCAGTTCTATACCAACAT
>gi|197257377|gb|FJ028565.1|_Volatinia_jacarina_voucher_MACN-Or-ct_1565_cytochrome_oxidase_subunit_1_(COI)_gene_partial_cds_mitochondrial
CTGTACCTGATTTTCGGCGCATGAGCCGGAATAGTGGGCACTGCCCTAAGTCTCCTCATCCGTGCAGAGCTAGGCCAACCCGGAGCCCTCCTGGGAGACGACCAAGTCTACAACGTAGTCGTCACAGCCCATGCTTTCGTGATAATCTTCTTCATAGTTATGCCAATTATAATTGGAGGGTTCGGAAACTGACTAGTTCCCCTAATAATTGGAGCACCAGACATAGCATTTCCACGAATAAACAACATAAGCTTCTGACTACTCCCCCCATCCTTCCTCCTTCTCCTAGCATCCTCCACAGTTGAAGCAGGAGTCGGTACAGGCTGAACAGTATACCCCCCACTAGCTGGCAACCTAGCCCACGCCGGAGCCTCAGTCGACCTCGCAATCTTCTCCCTACATTTAGCTGGCATCTCATCAATCCTGGGGGCAATTAACTTCATCACTACAGCAATCAACATAAAACCCCCCGCCCTCTCACAATACCAAACCCCCCTATTCGTCTGATCCGTCCTAATCACTGCAGTCCTACTACTCCTATCACTCCCAGTCCTAGCTGCAGGCATCACAATACTCCTCACAGACCGTAACCTTAACACCACATTCTTCGACCCTGCCGGAGGAGGAGACCCAGTCTTATACCAACAC
>gi|197257373|gb|FJ028563.1|_Volatinia_jacarina_voucher_MACN-Or-ct_1945_cytochrome_oxidase_subunit_1_(COI)_gene_partial_cds_mitochondrial
CNGTACNTGATTTTCGGCGCATGAGCCGGAATAGTAGGCACTGCCCTAAGTCTCCTCATCCGTGCAGAGCTAGGCCAACCCGGAGCCCTCCTGGGAGACGACCAAGTCTACAACGTAGTCGTCACAGCCCATGCTTTCGTGATAATCTTCTTCATAGTTATGCCAATTATAATTGGAGGGTTCGGAAACTGACTAGTTCCCCTAATAATTGGAGCACCAGACATAGCATTTCCACGAATAAACAACATAAGCTTCTGACTACTCCCCCCATCCTTCCTCCTTCTCCTAGCATCCTCTACAGTTGAAGCAGGAGTCGGTACAGGCTGAACAGTATACCCCCCACTAGCTGGCAACCTAGCCCACGCCGGAGCCTCAGTCGACCTCGCAATCTTCTCCCTACATTTAGCTGGCATCTCATCAATCCTAGGGGCAATTAACTTCATCACTACAGCAATCAACATAAAACCCCCCGCCCTCTCACAATACCAAACCCCCCTATTCGTCTGATCCGTCCTAATCACTGCAGTCCTACTACTCCTATCACTCCCAGTCCTAGCTGCAGGCATCACAATACTCCTCACAGACCGTAACCTTAACACCACATTCTTCGACCCTGCCGGAGGAGGAGACCCAGTCTTATACCAACAC
>gi|197257369|gb|FJ028561.1|_Vireo_olivaceus_voucher_MACN-Or-ct_1121_cytochrome_oxidase_subunit_1_(COI)_gene_partial_cds_mitochondrial
CTGTACCTAATCTTCGGCGCATGAGCCGGAATGGTAGGTACCGCCCTAAGTCTCCTAATTCGAGCAGAACTAGGCCAACCCGGGGCCCTACTGGGAGACGACCAAATCTACAACGTAGTCGTCACGGCCCATGCCTTCGTAATAATCTTCTTCATAGTAATGCCAATTATGATCGGAGGATTCGGAAACTGACTAGTTCCCCTAATAATTGGAGCCCCAGACATAGCATTCCCCCGAATAAACAACATAAGCTTCTGACTACTCCCACCATCATTCCTACTACTAATAGCCTCCTCAACAGTAGAAGCAGGCGTTGGAACAGGATGAACCGTATACCCACCACTAGCTGGAAACCTAGCCCATGCCGGAGCCTCAGTAGACCTAGCTATCTTCTCCCTACACCTAGCAGGTATCTCTTCCATTCTAGGAGCAATCAACTTCATTACAACAGCAATCAACATAAAACCGCCCGCCCTATCACAATACCAAACACCACTATTCGTATGATCCGTACTAATTACAGCCGTACTACTCCTACTATCACTCCCAGTGCTAGCTGCTGGAATTACAATACTACTCACAGACCGCAACCTCAACACCACTTTCTTCGACCCAGCAGGAGGAGGAGACCCAGTACTATACCAACAC
>gi|197257365|gb|FJ028559.1|_Vireo_olivaceus_voucher_MACN-Or-ct_3061_cytochrome_oxidase_subunit_1_(COI)_gene_partial_cds_mitochondrial
CTGTACCTAATCTTCGGCGCCGGAGCCGGAATGGTAGGTACCGCCCTAAGTCTCCTAATTCGAGCAGAACTAGGCCAACCCGGGGCCCTACTGGGAGACGACCAAATCTACAACGTAGTCGTCACGGCCCATGCCTTCGTAATAATCTTCTTCATAGTAATACCAATTATGATCGGAGGATTCGGAAACTGACTAGTTCCCCTAATAATTGGAGCCCCAGACATAGCATTCCCCCGAATAAACAACATAAGCTTCTGACTACTCCCACCATCATTCCTACTACTAATAGCCTCCTCAACAGTAGAAGCAGGCGTTGGAACAGGATGAACCGTATACCCACCACTAGCTGGAAACCTAGCCCATGCCGGAGCCTCAGTAGACCTAGCTATCTTCTCCCTACACCTAGCAGGTATCTCTTCCATTCTAGGAGCAATCAACTTCATTACAACAGCAATCAACATAAAACCGCCCGCCCTATCACAATACCAAACACCACTATTCGTATGATCCGTACTAATTACAGCCGTACTACTCCTACTATCACTCCCAGTGCTAGCTGCTGGAATTACAATACTACTCACAGACCGCAACCTCAACACCACTTTCTTCGACCCAGCAGGAGGAGGAGACCCAGTACTATACCAACAC
>gi|197257361|gb|FJ028557.1|_Vireo_olivaceus_voucher_MACN-Or-ct_1123_cytochrome_oxidase_subunit_1_(COI)_gene_partial_cds_mitochondrial
----------------------GANNCGGAATGGTAGNNACCGCCCTAAGTCTCCTAATTCGAGCAGAACTAGGCCAACCCGGGGCCCTACTGGGAGACGACCAAATCTACAACGTAGTCGTCACGGCCCATGCCTTCGTAATAATCTTCTTCATAGTAATGCCAATTATGATCGGAGGATTCGGAAACTGACTAGTTCCCCTAATAATTGGAGCCCCAGACATAGCATTCCCCCGAATAAACAACATAAGCTTCTGACTACTACCACCATCATTCCTACTACTAATAGCCTCCTCAACAGTAGAAGCAGGCGTTGGAACAGGATGAACCGTATACCCACCACTAGCTGGAAACCTAGCCCATGCCGGAGCCTCAGTAGACCTAGCTATCTTCTCCCTACACCTAGCAGGTATCTCTTCCATTCTAGGAGCAATCAACTTCATTACAACAGCAATCAACATAAAACCGCCCGCCCTATCACAATACCAAACACCACTATTCGTATGATCCGTACTAATTACAGCCGTACTACTCCTACTATCACTCCCAGTGCTAGCTGCTGGAATTACAATACTACTCACAGACCGCAACCTCAACACCACTTTCTTCGACCCAGCAGGAGGAGGAGACCCAGTACTATACCAACAC
>gi|197257357|gb|FJ028555.1|_Veniliornis_passerinus_voucher_MACN-Or-ct_1640_cytochrome_oxidase_subunit_1_(COI)_gene_partial_cds_mitochondrial
CTGTATCTTATCTTCGGTGCATGAGCCGGCATAATCGGTACAGCCCTTAGCCTCCTCATTCGAGCAGAACTAGGCCAACCCGGCACCCTCCTCGGCGATGACCAAATCTACAACGTCATCGTCACCGCCCATGCATTCGTGATAATTTTCTTCATGGTTATACCGATCATAATCGGAGGGTTTGGAAACTGACTTGTACCGCTCATAATCGGAGCCCCCGACATAGCATTCCCACGAATGAACAATATAAGCTTCTGACTCCTCCCCCCGTCATTCCTTCTCCTCTTAGCCTCCTCCACAGTAGAAGCAGGAGCCGGAACAGGATGAACTGTCTACCCACCCCTTGCTGGCAACTTAGCCCATGCAGGAGCCTCAGTAGACTTGGCTATCTTCTCACTTCACTTAGCAGGCATCTCATCAATCCTAGGAGCAATCAACTTCATTACAACGGCCATTAACATGAAACCCCCAGCCATCTCACAATATCAAACCCCCCTGTTCGTCTGATCCGTCCTTATCACCGCTGTCCTCCTACTCCTATCACTCCCCGTGCTCGCCGCTGGCATTACAATACTCCTCACAGACCGCAACCTAAACACTACATTCTTCGACCCCGCTGGAGGAGGAGACCCCATCCTCTACCAACAC
>gi|197257353|gb|FJ028553.1|_Veniliornis_frontalis_voucher_MACN-Or-ct_970_cytochrome_oxidase_subunit_1_(COI)_gene_partial_cds_mitochondrial
CTGTATCTTATCTTCGGTGCATGAGCCGGCATAATCGGTACAGCCCTTAGCCTCCTCATTCGAGCAGAACTAGGCCAACCCGGCACCCTCCTCGGCGATGACCAAATCTACAACGTCATCGTCACCGCCCATGCATTCGTGATAATTTTCTTCATAGTTATACCGATCATAATCGGGGGGTTTGGAAACTGACTTGTACCGCTCATAATCGGAGCCCCCGACATAGCATTCCCACGAATGAACAATATAAGCTTCTGACTCCTCCCCCCGTCATTCCTTCTCCTCTTAGCCTCCTCCACAGTAGAAGCAGGAGCCGGAACAGGATGAACTGTCTACCCACCCCTTGCTGGCAACTTAGCCCATGCAGGAGCCTCAGTAGACTTGGCTATCTTCTCACTTCACTTAGCAGGCATCTCATCAATCCTAGGAGCAATCAACTTCATTACAACGGCCATTAACATGAAACCCCCAGCCATCTCACAATATCAAACCCCCCTGTTCGTCTGATCCGTCCTTATCACCGCTGTCCTCCTACTCCTATCACTCCCCGTGCTCGCCGCTGGCATTACAATACTCCTCACAGACCGCAACCTAAACACTACATTCTTCGACCCCGCTGGAGGAGGAGACCCCATCCTCTACCAACAC
>gi|197257349|gb|FJ028551.1|_Vanellus_chilensis_voucher_MACN-Or-ct_1938_cytochrome_oxidase_subunit_1_(COI)_gene_partial_cds_mitochondrial
------------------GCATGAGCAGGTATAGTCGGTACTGCCCTCAGCCTTCTCATCCGCGCAGAACTAGGCCAACCAGGAACTCTACTAGGCGACGACCAAATCTACAACGTAATCGTCACCGCCCATGCCTTCGTAATAATCTTCTTCATGGTAATGCCAATTATAATCGGTGGCTTCGGCAACTGACTAGTCCCACTCATAATCGGCGCACCTGACATAGCATTCCCCCGCATAAACAACATAAGCTTCTGACTACTACCCCCCTCGTTCCTACTACTACTTGCCTCTTCTACAGTAGAAGCAGGAGCAGGCACAGGATGAACTGTCTACCCACCCCTAGCTGGTAACCTGGCCCACGCTGGAGCTTCAGTAGACTTAGCCATCTTCTCACTCCACTTAGCAGGTGTATCCTCTATCCTAGGCGCAATCAACTTCATCACAACTGCCATCAACATAAAACCCCCCGCCCTCTCACAATACCAAACACCCTTATTTGTATGATCCGTACTTATCACAGCCGTTCTACTACTCCTATCACTCCCAGTTCTCGCCGCGGGCATCACCATGCTACTAACAGACCGAAATCTAAATACCACATTCTTCGACCCTGCTGGAGGAGGTGACCCAGTTTTATACCAACAC
>gi|197257345|gb|FJ028549.1|_Vanellus_chilensis_voucher_MACN-Or-ct_587_cytochrome_oxidase_subunit_1_(COI)_gene_partial_cds_mitochondrial
CTATACCTAATCTTCGGTGCATGAGCAGGTATAGTCGGTACTGCCCTTAGCCTTCTCATCCGCGCAGAACTAGGCCAACCAGGAACTCTACTAGGCGATGACCAAATCTACAACGTAATCGTCACCGCCCATGCCTTCGTAATAATCTTCTTCATGGTAATGCCAATTATAATCGGTGGCTTCGGCAACTGACTAGTCCCACTCATAATCGGCGCACCTGACATAGCATTTCCCCGCATAAACAATATAAGCTTCTGACTACTACCCCCCTCGTTCCTACTACTACTTGCCTCCTCTACAGTAGAAGCAGGAGCAGGCACAGGATGAACTGTCTACCCACCCCTAGCTGGTAACCTGGCCCACGCTGGAGCTTCAGTAGACCTAGCCATCTTCTCACTCCACTTAGCAGGTGTATCCTCTATCCTAGGCGCAATCAACTTCATCACAACTGCCATCAACATAAAACCTCCCGCCCTCTCACAATACCAAACACCCTTATTTGTGTGATCCGTACTTATCACGGCCGTTCTACTACTCCTATCACTCCCAGTTCTCGCCGCGGGCATCACCATGCTGCTAACAGACCGAAATCTAAATACCACATTCTTCGACCCTGCTGGAGGAGGTGACCCAGTTTTATACCAACAC
>gi|197257341|gb|FJ028547.1|_Vanellus_chilensis_voucher_MACN-Or-ct_3028_cytochrome_oxidase_subunit_1_(COI)_gene_partial_cds_mitochondrial
CTATACCTAATCTTCGGTGCATGAGCAGGTATAGTCGGTACTGCCCTTAGCCTTCTCATCCGCGCAGAACTAGGCCAACCAGGAACTCTACTAGGCGATGACCAAATCTACAACGTAATCGTCACCGCCCATGCCTTCGTAATAATCTTCTTCATGGTAATGCCAATTATAATCGGTGGCTTCGGCAACTGACTAGTCCCACTCATAATCGGCGCACCTGACATAGCATTTCCCCGCATAAACAATATAAGCTTCTGACTACTACCCCCCTCGTTCCTACTACTACTTGCCTCCTCTACAGTAGAAGCAGGAGCAGGCACAGGATGAACTGTCTACCCACCCCTAGCTGGTAACCTGGCCCACGCTGGAGCTTCAGTAGACCTAGCCATCTTCTCACTCCACTTAGCAGGTGTATCCTCTATCCTAGGCGCAATCAACTTCATCACAACTGCCATCAACATAAAACCTCCCGCCCTCTCACAATACCAAACACCCTTATTTGTGTGATCCGTACTTATCACGGCCGTTCTACTACTCCTATCACTCCCAGTTCTCGCCGCGGGCATCACCATGCTGCTAACAGACCGAAATCTAAATACCACATTCTTCGACCCTGCTGGAGGAGGTGACCCAGTTTTATACCAACAC
>gi|197257337|gb|FJ028545.1|_Vanellus_chilensis_voucher_MACN-Or-ct_1432_cytochrome_oxidase_subunit_1_(COI)_gene_partial_cds_mitochondrial
------------------------------ATAGTCGGTACTGCCCTTAGCCTTCTCATCCGCGCAGAACTAGGCCAACCAGGAACTCTACTAGGCGACGACCAAATCTACAACGTAATCGTCACCGCCCATGCCTTCGTAATAATCTTCTTCATGGTAATGCCAATTATAATCGGTGGCTTCGGCAACTGACTAGTCCCACTCATAATCGGCGCACCTGACATAGCATTCCCCCGCATAAACAACATAAGCTTCTGACTACTACCCCCCTCGTTCCTACTACTACTTGCCTCTTCTACAGTAGAAGCAGGAGCAGGCACAGGATGAACTGTCTACCCACCCCTAGCTGGTAACCTGGCCCACGCTGGAGCTTCAGTAGACTTAGCCATCTTCTCACTCCACTTAGCAGGTGTATCCTCTATCCTAGGCGCAATCAACTTCATCACAACTGCCATCAACATAAAACCCCCCGCCCTCTCACAATACCAAACACCCTTATTTGTATGATCCGTACTTATCACAGCCGTTCTACTACTCCTATCACTCCCAGTTCTCGCCGCGGGCATCACCATGCTACTAACAGACCGAAATCTAAATACCACATTCTTCGACCCTGCTGGAGGAGGTGACCCAGTTTTATACCAACAC
>gi|197257333|gb|FJ028543.1|_Upucerthia_ruficaudus_voucher_MACN-Or-ct_1095_cytochrome_oxidase_subunit_1_(COI)_gene_partial_cds_mitochondrial
CTTTACCTAATCTTCGGAGCTTGAGCCGGCATAATTGGAACCGCCCTAAGCCTTCTAATCCGAGCCGAACTTGGGCAACCAGGTACCCTCATAGGTGACGACCAAATCTATAACGTGATTGTCACCGCTCATGCCTTCGTAATAATCTTCTTTATAGTTATACCCATTATAATTGGGGGCTTCGGCAACTGACTAGTCCCACTAATAATTGGCGCCCCCGATATAGCATTCCCTCGAATAAACAACATAAGCTTTTGACTCCTACCTCCATCCTTCCTTCTTCTCCTAGCCTCTTCAACAGTTGAAGCTGGAGCAGGAACAGGATGAACAGTTTACCCACCGTTAGCAGGTAACCTAGCTCATGCTGGAGCCTCAGTAGACCTAGCTATCTTCTCTCTCCACCTAGCTGGTGTATCTTCCATCCTAGGAGCTATCAACTTCATCACTACCGCAGTGAATATAAAACCACCCGCCCTCTCTCAATACCAAACTCCATTATTTGTCTGATCCGTCCTTATTACTGCCGTACTTCTTCTACTCTCTCTCCCAGTCTTAGCTGCAGGCATCACAATACTACTTACAGATCGTAATCTAAACACCACATTCTTTGATCCAGCTGGGGGTGGAGATCCTGTCCTATATCAACAT
>gi|197257329|gb|FJ028541.1|_Upucerthia_dumetaria_voucher_MACN-Or-ct_3014_cytochrome_oxidase_subunit_1_(COI)_gene_partial_cds_mitochondrial
CTCTACCTAATTTTTGGAGCATGGGCCGGTATAATTGGGACCGCCCTTAGCCTCCTTATTCGAGCCGAACTCGGACAACCAGGTACCCTCCTAGGAGACGACCAAATCTATAACGTAATCGTCACTGCCCATGCTTTCGTAATAATCTTCTTTATAGTTATGCCTATCATAATTGGTGGCTTTGGTAACTGACTAGTTCCACTAATAATTGGTGCCCCCGACATAGCTTTCCCCCGAATAAATAACATAAGCTTCTGACTACTCCCACCATCTTTTCTACTCCTTCTAGCCTCTTCAACAGTAGAAGCAGGAGTCGGAACAGGATGAACAGTTTACCCTCCACTAGCAGGCAACCTAGCTCATGCTGGAGCCTCGGTAGATCTAGCAATCTTCTCCCTTCATCTAGCCGGTGTATCCTCTATTCTAGGGGCTATCAACTTTATCACAACCGCAATCAATATAAAACCACCCACTCTCTCACAATACCAAACCCCACTATTTGTCTGATCCGTCCTCATCACTGCCGTCCTTCTCCTTCTCTCCCTTCCTGTTCTAGCCGCCGGAATTACAATACTACTCACAGACCGTAACCTAAACACAACATTCTTTGACCCAGCCGGAGGCGGAGACCCTGTTCTATATCAACAC
>gi|197257325|gb|FJ028539.1|_Upucerthia_dumetaria_voucher_MACN-Or-ct_3005_cytochrome_oxidase_subunit_1_(COI)_gene_partial_cds_mitochondrial
CTCTACCTAATTTTTGGAGCATGGGCCGGTATAATTGGGACCGCCCTTAGCCTCCTTATTCGAGCCGAACTCGGACAACCAGGTACCCTCCTAGGAGACGACCAAATCTATAACGTAATCGTCACTGCCCATGCATTCGTAATAATCTTCTTTATAGTTATGCCTATCATAATTGGTGGCTTTGGTAACTGACTAGTTCCACTAATAATTGGTGCCCCCGACATAGCTTTCCCCCGAATAAATAACATAAGCTTCTGACTACTCCCACCATCTTTTCTACTCCTTCTAGCCTCTTCAACAGTAGAAGCAGGAGTCGGAACAGGATGAACAGTTTACCCTCCACTAGCAGGCAACCTAGCTCATGCTGGAGCCTCGGTAGATCTAGCAATCTTCTCCCTTCATCTAGCCGGTGTATCCTCTATTCTAGGGGCTATCAACTTTATCACAACCGCAATCAATATAAAACCACCCACTCTCTCACAATACCAAACCCCACTATTTGTCTGATCCGTCCTCATCACTGCCGTCCTTCTCCTTCTCTCCCTTCCTGTTCTAGCCGCCGGAATTACAATACTACTCACAGACCGTAACCTAAACACAACATTCTTTGACCCAGCCGGAGGCGGAGACCCTGTTCTATATCAACAC
>gi|197257321|gb|FJ028537.1|_Upucerthia_dumetaria_voucher_MACN-Or-ct_2725_cytochrome_oxidase_subunit_1_(COI)_gene_partial_cds_mitochondrial
CTCTACCTAATTTTTGGAGCATGGGCCGGCATAATTGGGACCGCCCTTAGCCTCCTTATTCGAGCCGAACTCGGACAACCAGGTACCCTCCTAGGAGACGACCAAATCTATAACGTAATCGTCACTGCCCATGCATTCGTAATAATCTTCTTTATAGTTATGCCTATCATAATTGGTGGCTTTGGTAACTGACTAGTTCCACTAATAATTGGTGCCCCCGACATAGCTTTCCCCCGAATAAATAACATAAGCTTCTGACTACTCCCACCATCTTTTCTACTCCTTCTAGCCTCTTCAACAGTAGAAGCAGGAGTCGGAACAGGATGAACAGTTTACCCTCCACTAGCAGGCAACCTAGCTCATGCTGGAGCCTCGGTAGATCTAGCAATCTTCTCCCTTCATCTAGCCGGTGTATCCTCTATTCTAGGGGCTATCAACTTTATCACAACCGCAATCAATATAAAACCACCCACTCTCTCACAATACCAAACCCCACTATTTGTCTGATCCGTCCTCATCACTGCCGTCCTTCTCCTTCTCTCCCTTCCTGTTCTAGCCGCCGGAATTACAATACTACTCACAGACCGTAACCTAAACACAACATTCTTTGACCCAGCCGGAGGCGGAGACCCTGTTCTATATCAACAC
>gi|197257317|gb|FJ028535.1|_Upucerthia_dumetaria_voucher_MACN-Or-ct_2648_cytochrome_oxidase_subunit_1_(COI)_gene_partial_cds_mitochondrial
CTATACCTAATTTTTGGAGCATGGGCCGGTATAATTGGAACCGCCCTCAGTCTCCTTATTCGAGCCGAACTCGGACAACCAGGTACCCTCCTAGGAGATGACCAAATCTACAACGTAATCGTTACTGCCCACGCTTTCGTAATAATCTTCTTTATAGTTATACCCATTATAATCGGTGGCTTTGGCAACTGACTAGTTCCACTAATAATTGGTGCCCCCGACATAGCTTTTCCCCGAATAAACAACATAAGCTTCTGACTCCTCCCACCATCTTTTCTACTCCTTCTAGCCTCTTCAACAGTAGAAGCAGGAGCCGGAACAGGATGAACAGTTTATCCTCCACTAGCAGGCAACCTAGCTCATGCTGGAGCCTCAGTAGATCTGGCAATCTTCTCACTTCACCTAGCCGGTGTATCCTCTATTCTTGGGGCTATTAACTTTATCACAACCGCAATCAATATAAAACCACCCACTCTCTCACAATACCAAACCCCACTATTTGTCTGATCCGTCCTTATCACTGCTGTCCTTCTCCTTCTCTCCCTCCCTGTCCTGGCCGCCGGAATTACAATATTACTTACAGACCGTAACTTAAACACAACATTCTTTGACCCAGCCGGAGGTGGAGACCCTGTTCTATACCAACAC
>gi|197257313|gb|FJ028533.1|_Upucerthia_dumetaria_voucher_MACN-Or-ct_601_cytochrome_oxidase_subunit_1_(COI)_gene_partial_cds_mitochondrial
CTCTACCTAATTTTTGGAGCATGGGCCGGTATAATTGGGACCGCCCTTAGCCTCCTTATTCGAGCCGAACTCGGACAACCAGGTACCCTCCTAGGAGACGACCAAATCTATAACGTAATCGTCACTGCCCATGCTTTCGTAATAATCTTCTTTATAGTTATGCCTATCATAATTGGTGGCTTTGGTAACTGACTAGTTCCACTAATAATTGGTGCCCCCGACATAGCTTTCCCCCGAATAAATAACATAAGCTTCTGACTACTCCCACCATCTTTTCTACTCCTTCTAGCCTCTTCAACAGTAGAAGCAGGAGTCGGAACAGGATGAACAGTTTACCCTCCACTAGCAGGCAACCTAGCTCATGCTGGAGCCTCGGTAGATCTAGCAATCTTCTCCCTTCATCTAGCCGGTGTATCCTCTATTCTAGGGGCTATCAACTTTATCACAACCGCAATCAATATAAAACCACCCACTCTCTCACAATACCAAACCCCACTATTTGTCTGATCCGTCCTCATCACTGCCGTCCTTCTCCTTCTCTCCCTTCCTGTTCTAGCCGCCGGAATTACAATACTACTCACAGACCGTAACCTAAACACAACATTCTTTGACCCAGCCGGAGGCGGAGACCCTGTTCTATATCAACAC
>gi|197257309|gb|FJ028531.1|_Upucerthia_dumetaria_voucher_MACN-Or-ct_559_cytochrome_oxidase_subunit_1_(COI)_gene_partial_cds_mitochondrial
CTCTACCTAATTTTTGGAGCATGGGCCGGTATAATTGGAACCGCCCTTAGCCTCCTTATTCGAGCCGAACTCGGACAACCAGGTACCCTCCTAGGAGACGACCAAATCTATAACGTAATCGTCACTGCCCATGCTTTCGTAATAATCTTCTTTATAGTTATACCTATCATAATTGGTGGCTTTGGTAACTGACTAGTTCCACTAATAATTGGTGCCCCCGACATAGCTTTCCCCCGAATAAATAACATAAGCTTCTGACTACTCCCACCATCTTTTCTACTCCTTCTAGCCTCTTCAACAGTAGAAGCAGGAGTCGGAACAGGATGAACAGTTTACCCTCCACTAGCAGGCAACCTAGCTCATGCTGGAGCCTCGGTAGATCTAGCAATCTTCTCCCTTCATCTAGCCGGTGTATCCTCTATTCTAGGGGCTATCAACTTTATCACAACCGCAATCAATATAAAACCACCCACTCTCTCACAATACCAAACCCCACTATTTGTCTGATCCGTCCTCATCACTGCCGTCCTTCTCCTTCTCTCCCTTCCTGTTCTAGCCGCCGGAATTACAATACTACTCACAGACCGTAACCTAAACACAACATTCTTTGACCCAGCCGGAGGCGGAGACCCTGTTCTATATCAACAC
>gi|197257305|gb|FJ028529.1|_Tyto_alba_voucher_MACN-Or-ct_2730_cytochrome_oxidase_subunit_1_(COI)_gene_partial_cds_mitochondrial
CTGTACCTAGTCTTCGGCGCATGGGCTGGCATAGTAGGCACAGCCCTCAGCCTCCTAATCCGGGCAGAATTAGGACAACCAGGAACCCTCCTGGGAGATGACCAAATCTACAACGTAATTGTCACTGCCCACGCCTTTGTAATAATTTTCTTCATGGTAATACCCATCATGATCGGCGGATTTGGAAACTGACTAGTCCCCCTCATAATCGGAGCCCCGGACATAGCATTTCCCCGCATAAATAACATAAGCTTCTGACTACTTCCCCCCTCCTTCCTGCTACTGCTCGCATCTTCCACAGTTGAAGCCGGAGCAGGCACAGGATGGACTGTCTACCCACCATTGGCCAGCAACATAGCCCACGCCGGGGCCTCAGTTGATCTGGCCATTTTTTCGCTCCACTTGGCAGGTGTCTCATCCATCCTCGGAGCAATCAACTTCATTACAACCGCCATTAACATAAAACCCCCGGCCCTGTCACAGTACCAAACACCACTGTTTGTATGGTCAGTCTTCATCACCGCAATTCTACTCCTACTATCGCTCCCAGTACTAGCCGCCGGCATTACCATGCTCTTAACCGACCGAAACCTAAACACCACATTCTTTGACCCTGCCGGGGGAGGCGACCCTGTCCTGTACCAGCAC
>gi|197257301|gb|FJ028527.1|_Tyrannus_savana_voucher_MACN-Or-ct_2744_cytochrome_oxidase_subunit_1_(COI)_gene_partial_cds_mitochondrial
TTATATTTAATTTTTGGTGCCTGAGCCGGTATAATTGGTACCGCCCTAAGCCTTCTTATCCGAGCAGAACTAGGACAACCAGGAACCCTCTTAGGAGACGACCAAATCTATAATGTAATCGTTACTGCTCACGCTTTCGTAATAATCTTTTTCATAGTAATACCTATTATAATTGGGGGATTTGGCAACTGACTAGTCCCCTTAATAATTGGCGCCCCAGACATAGCATTCCCACGCATGAACAATATAAGTTTCTGACTACTTCCCCCATCATTCCTTCTCCTTCTAGCTTCATCTACAGTAGAAGCCGGAGTCGGAACCGGATGAACTGTCTACCCACCATTAGCTGGCAATCTAGCACATGCCGGAGCTTCAGTAGACCTAGCTATCTTCTCACTTCACCTTGCAGGTGTTTCTTCAATTCTAGGTGCAATCAACTTTATTACCACTGCAATCAACATAAAACCACCAGCCCTATCACAGTATCAAACACCTCTATTTGTATGATCTGTCCTAATCACTGCAGTTCTTCTTCTCCTCTCTCTCCCAGTCCTCGCTGCCGGCATCACCATACTATTAACAGACCGTAACCTTAACACTACATTCTTCGACCCCGCAGGAGGCGGAGATCCAGTCTTATACCAACAC
>gi|197257297|gb|FJ028525.1|_Tyrannus_melancholicus_voucher_MACN-Or-ct_1763_cytochrome_oxidase_subunit_1_(COI)_gene_partial_cds_mitochondrial
TTATATTTAATTTTTGGCGCCTGAGCCGGTATAATTGGTACCGCCCTAAGCCTTCTTATTCGAGCAGAACTAGGACAACCAGGAACCCTCTTAGGAGACGACCAGATCTATAATGTAATCGTTACTGCTCACGCTTTCGTAATAATCTTTTTCATAGTAATACCTATTATAATTGGAGGATTTGGCAACTGACTAGTCCCCCTAATAATTGGCGCCCCAGACATAGCATTCCCACGCATGAACAATATAAGTTTCTGACTACTACCCCCATCATTCCTTCTCCTTCTAGCTTCATCTACAGTAGAAGCCGGAGTCGGGACCGGATGAACTGTCTACCCACCATTAGCTGGCAATCTAGCACATGCCGGAGCTTCAGTAGACCTAGCTATCTTCTCACTTCACCTTGCAGGTGTTTCCTCAATTCTAGGTGCAATCAACTTTATTACCACTGCAATCAACATAAAACCACCAGCCCTATCACAGTATCAAACACCTCTATTTGTATGATCTGTCCTAATCACTGCAGTTCTTCTTCTCCTCTCTCTCCCAGTCCTCGCTGCCGGCATCACCATACTATTGACAGACCGTAATCTTAACACTACATTCTTCGACCCCGCAGGAGGCGGAGATCCAGTCTTATACCAACAC
>gi|197257293|gb|FJ028523.1|_Tyrannus_melancholicus_voucher_MACN-Or-ct_906_cytochrome_oxidase_subunit_1_(COI)_gene_partial_cds_mitochondrial
TTATATTTAATTTTTGGCGCCTGAGCCGGTATAATTGGTACCGCCCTAAGCCTTCTTATCCGAGCAGAACTAGGACAACCAGGAACCCTCTTAGGAGACGACCAAATCTATAATGTAATCGTTACTGCTCACGCTTTCGTAATAATCTTTTTCATAGTAATACCTATTATAATTGGAGGATTTGGCAACTGACTAGTCCCCCTAATAATTGGCGCCCCAGACATAGCATTCCCACGCATGAACAATATAAGTTTCTGACTACTACCCCCATCATTCCTTCTCCTTCTAGCTTCATCTACAGTAGAAGCCGGAGTCGGGACCGGATGAACTGTCTACCCACCATTAGCTGGCAATCTAGCACATGCCGGAGCTTCAGTAGACCTAGCTATCTTCTCACTTCACCTTGCAGGTGTTTCTTCAATTCTAGGTGCAATCAACTTTATTACCACTGCAATCAACATAAAACCACCAGCCCTATCACAGTATCAAACACCTTTATTTGTATGATCTGTCCTAATCACTGCAGTTCTTCTTCTCCTCTCTCTCCCAGTCCTCGCTGCCGGCATCACCATACTATTAACAGACCGTAATCTTAACACTACATTCTTCGACCCCGCAGGAGGCGGAGATCCAGTCTTATACCAACAC
>gi|197257289|gb|FJ028521.1|_Tyrannus_melancholicus_voucher_MACN-Or-ct_1125_cytochrome_oxidase_subunit_1_(COI)_gene_partial_cds_mitochondrial
TTATATTTAATTTTTGGCGCCTGAGCCGGTATAATTGGTACCGCCCTAAGCCTTCTTATTCGAGCAGAACTAGGACAACCAGGAACCCTCTTAGGAGACGACCAGATCTATAATGTAATCGTTACTGCTCACGCTTTCGTAATAATCTTTTTCATAGTAATACCTATTATAATTGGAGGATTTGGCAACTGACTAGTCCCCCTAATAATTGGCGCCCCAGACATAGCATTCCCACGCATGAACAATATAAGTTTCTGACTACTACCCCCATCATTCCTTCTCCTTCTAGCTTCATCTACAGTAGAAGCCGGAGTCGGGACCGGATGAACTGTCTACCCACCATTAGCTGGCAATCTAGCACATGCCGGAGCTTCAGTAGACCTAGCTATCTTCTCACTTCACCTTGCAGGTGTTTCCTCAATTCTAGGTGCAATCAACTTTATTACCACTGCAATCAACATAAAACCACCAGCCCTATCACAGTATCAAACACCTCTATTTGTATGATCTGTCCTAATCACTGCAGTTCTTCTTCTCCTCTCTCTCCCAGTCCTCGCTGCCGGCATCACCATACTATTAACAGACCGTAATCTTAACACTACATTCTTCGACCCCGCAGGAGGCGGAGATCCAGTCTTATACCAACAC
>gi|197257285|gb|FJ028519.1|_Turdus_rufiventris_voucher_MACN-Or-ct_1890_cytochrome_oxidase_subunit_1_(COI)_gene_partial_cds_mitochondrial
-------------TCGGTGCATGAGCCGGNATAGTAGGTACTGCCCTAAGTCTCCTCATCCGAGCAGAACTAGGCCAACCAGGTGCCCTACTAGGTGACGACCAAATCTACAACGTAGTCGTTACCGCCCATGCTTTCGTAATAATCTTCTTCATAGTTATACCAATCATAATCGGAGGGTTCGGAAACTGACTAGTCCCCCTAATAATCGGAGCCCCAGACATAGCATTCCCCCGAATAAACAACATAAGCTTTTGACTCCTCCCCCCATCCTTCCTTCTCCTCCTAGCCTCTTCTACAGTAGAAGCTGGAGCAGGGACAGGCTGAACCGTCTATCCCCCCCTCGCCGGCAACCTAGCACACGCGGGAGCTTCAGTTGACCTAGCCATCTTCTCCCTACACCTCGCAGGAATCTCCTCAATCCTGGGGGCCATCAACTTCATCACAACAGCAATCAACATAAAACCACCTGCCCTCTCACAATACCAAACCCCCCTATTCGTCTGATCAGTTCTAATCACTGCAGTGCTACTCCTATTATCCCTCCCCGTCCTCGCCGCTGGCATCACTATGCTCCTCACCGACCGCAACCTAAACACGACCTTCTTCGACCCAGCAGGAGGAGGAGACCCAGTACTATACCAACAC
>gi|197257281|gb|FJ028517.1|_Turdus_rufiventris_voucher_MACN-Or-ct_2871_cytochrome_oxidase_subunit_1_(COI)_gene_partial_cds_mitochondrial
CTCTATCTAATCTTCGGTGCATGAGCCGGAATAGTGGGTACCGCCCTAAGTCTCCTCATCCGGGCAGAACTAGGCCAACCAGGTGCCCTACTAGGTGACGACCAAATCTACAACGTAGTCGTTACCGCCCATGCTTTCGTAATAATCTTCTTCATAGTTATACCAATTATAATCGGAGGGTTCGGAAACTGACTAGTCCCCCTAATAATCGGAGCCCCAGACATAGCATTCCCCCGAATAAACAACATAAGCTTTTGACTCCTCCCCCCATCCTTCCTTCTCCTCCTAGCCTCTTCTACAGTAGAAGCTGGAGCAGGGACAGGCTGAACCGTCTATCCCCCCCTCGCCGGCAACCTAGCACACGCGGGAGCTTCAGTTGACCTAGCCATCTTCTCCCTACACCTCGCAGGAATCTCCTCAATCCTAGGGGCCATCAACTTCATCACAACAGCAATCAACATAAAACCACCTGCCCTCTCACAATACCAAACCCCCCTATTCGTCTGATCAGTTCTAATCACTGCAGTGCTACTCCTATTATCCCTCCCCGTCCTCGCCGCTGGCATCACTATGCTCCTCACCGACCGCAACCTAAACACGACCTTCTTCGACCCAGCAGGAGGAGGAGACCCAGTACTATACCAACAC
>gi|197257277|gb|FJ028515.1|_Turdus_rufiventris_voucher_MACN-Or-ct_3161_cytochrome_oxidase_subunit_1_(COI)_gene_partial_cds_mitochondrial
---------------------------GGAATAGTGGGTACTGCCCTAAGTCTCCTCATCCGGGCAGAACTAGGCCAACCAGGTGCCCTACTAGGTGACGACCAAATCTACAACGTAGTCGTTACCGCCCATGCTTTCGTAATAATCTTCTTCATAGTTATACCAATTATAATCGGAGGGTTCGGAAACTGACTAGTCCCCCTAATAATCGGAGCCCCAGACATAGCATTCCCCCGAATAAACAACATAAGCTTTTGACTCCTCCCCCCATCCTTCCTTCTCCTCCTAGCCTCTTCTACAGTAGAAGCTGGAGCAGGGACAGGCTGAACCGTCTATCCCCCCCTCGCCGGCAACCTAGCACACGCGGGAGCTTCAGTTGACCTAGCCATCTTCTCCCTACACCTCGCAGGAATCTCCTCAATCCTAGGGGCCATCAACTTCATCACAACAGCAATCAACATAAAACCACCTGCCCTCTCACAATACCAAACCCCCCTATTCGTCTGATCAGTTCTAATCACTGCAGTGCTACTCCTATTATCCCTCCCCGTCCTCGCCGCTGGCATCACTATGCTCCTCACCGACCGCAACCTAAACACGACCTTCTTCGACCCAGCAGGAGGAGGAGACCCAGTACTATACCAACAC
>gi|197257273|gb|FJ028513.1|_Turdus_rufiventris_voucher_MACN-Or-ct_895_cytochrome_oxidase_subunit_1_(COI)_gene_partial_cds_mitochondrial
CTCTATCTAATCTTCGGTGCATGAGCCGGAATAGTGGGTACTGCCCTAAGTCTCCTCATCCGGGCAGAACTAGGCCAACCAGGTGCCCTACTAGGTGACGACCAAATCTACAACGTAGTCGTTACCGCCCATGCTTTCGTAATAATCTTCTTCATAGTTATACCAATTATAATCGGAGGGTTCGGAAACTGACTAGTCCCCCTAATAATCGGAGCCCCAGACATAGCATTCCCCCGAATAAACAACATAAGCTTTTGACTCCTCCCCCCATCCTTCCTTCTCCTCCTAGCCTCTTCTACAGTAGAAGCTGGAGCAGGGACAGGCTGAACCGTCTATCCCCCCCTCGCCGGCAACCTAGCACACGCGGGAGCTTCAGTTGACCTAGCCATCTTCTCCCTACACCTCGCAGGAATCTCCTCAATCCTGGGGGCCATCAACTTCATCACAACAGCAATCAACATAAAACCACCTGCCCTCTCACAATACCAAACCCCCCTATTCGTCTGATCAGTTCTAATCACTGCAGTGCTACTCCTGTTATCCCTCCCCGTCCTCGCCGCTGGCATCACTATGCTCCTCACCGACCGCAACCTAAACACGACCTTCTTCGACCCAGCAGGAGGAGGAGACCCAGTACTATACCAACAC
>gi|197257269|gb|FJ028511.1|_Turdus_rufiventris_voucher_MACN-Or-ct_1154_cytochrome_oxidase_subunit_1_(COI)_gene_partial_cds_mitochondrial
--------AATCTTCGGTGCATGAGCCGGAATAGTGGGTACTGCCCTAAGTCTCCTCATCCGGGCAGAACTAGGCCAACCAGGTGCCCTACTAGGTGACGACCAAATCTACAACGTAGTCGTTACCGCCCATGCTTTCGTAATAATCTTCTTCATAGTTATACCAATTATAATCGGAGGGTTCGGAAACTGACTAGTCCCCCTAATAATCGGAGCCCCAGACATAGCATTCCCCCGAATAAACAACATAAGCTTTTGACTCCTCCCCCCATCCTTCCTTCTCCTCCTAGCCTCTTCTACAGTAGAAGCTGGAGCAGGGACAGGCTGAACCGTCTATCCCCCCCTCGCCGGCAACCTAGCACACGCAGGAGCTTCAGTTGACCTAGCCATCTTCTCCCTACACCTCGCAGGAATCTCCTCAATCCTGGGGGCCATCAACTTCATCACAACAGCAATCAACATAAAACCACCTGCCCTCTCACAATACCAAACCCCCCTATTCGTCTGATCAGTTCTAATCACTGCAGTGCTACTCCTGTTATCCCTCCCCGTCCTCGCCGCTGGCATCACTATGCTCCTCACCGACCGCAACCTAAACACGACCTTCTTCGACCCAGCAGGAGGAGGAGACCCAGTACTATACCAACAC
>gi|197257265|gb|FJ028509.1|_Turdus_nigriceps_voucher_MACN-Or-ct_960_cytochrome_oxidase_subunit_1_(COI)_gene_partial_cds_mitochondrial
----------------------GAGCCGGAATAGTGGGTACTGCCCTAAGTCTCCTCATCCGAGCAGAATTAGGCCAACCAGGTGCCCTACTAGGCGACGACCAAATCTACAACGTGGTCGTTACCGCCCATGCTTTCGTAATAATCTTCTTCATAGTTATACCAATCATAATCGGAGGGTTCGGAAACTGACTAGTCCCCCTAATAATCGGAGCCCCAGACATAGCATTCCCCCGAATAAACAACATAAGCTTTTGACTCCTCCCCCCATCCTTCCTTCTCCTCCTAGCCTCTTCTACAGTAGAAGCCGGGGCAGGAACGGGTTGAACCGTCTACCCACCCCTCGCCGGCAACCTAGCACACGCAGGCGCTTCAGTCGACTTAGCCATCTTTTCCCTACACCTCGCAGGGATCTCCTCAATCCTTGGGGCCATCAACTTCATCACAACAGCAATCAACATAAAACCACCTGCCCTCTCACAATACCAAACCCCCCTATTCGTCTGATCAGTGCTAATCACTGCAGTACTACTCCTACTATCCCTCCCCGTCCTTGCCGCTGGCATCACTATACTCCTCACCGACCGTAACCTAAATACGACCTTCTTCGACCCAGCAGGGGGAGGGGACCCAGTACTATACCAACAC
>gi|197257261|gb|FJ028507.1|_Turdus_leucomelas_voucher_MACN-Or-ct_2872_cytochrome_oxidase_subunit_1_(COI)_gene_partial_cds_mitochondrial
CTCTATCTAATCTTCGGTGCATGAGCCGGAATAGTAGGTACCGCCCTAAGTCTCCTCATCCGAGCAGAACTAGGCCAACCGGGTGCCCTACTAGGCGACGACCAAATCTACAACGTGGTTGTTACCGCCCATGCCTTCGTAATAATCTTCTTCATAGTTATACCAATCATAATCGGAGGGTTCGGAAACTGACTAGTCCCCCTAATAATCGGAGCCCCAGACATAGCATTCCCTCGAATAAACAACATAAGCTTTTGACTTCTCCCCCCATCCTTCCTTCTCCTCCTAGCCTCCTCTACAGTAGAAGCCGGAGCAGGGACAGGTTGAACCGTCTATCCTCCCCTCGCCGGCAACCTAGCACACGCAGGAGCTTCAGTTGACTTAGCCATCTTTTCCCTACACCTTGCAGGAATCTCCTCAATCCTAGGAGCCATCAACTTCATTACAACAGCAATCAACATAAAACCACCTGCCCTCTCACAATACCAAACCCCCCTATTCGTCTGATCAGTCCTAATTACCGCAGTGCTGCTCCTTCTATCCCTCCCCGTCCTTGCCGCTGGCATCACTATGCTCCTCACCGACCGTAACCTAAACACAACCTTCTTCGACCCAGCAGGAGGAGGAGACCCAGTACTATACCAACAC
>gi|197257257|gb|FJ028505.1|_Turdus_falcklandii_voucher_MACN-Or-ct_2579_cytochrome_oxidase_subunit_1_(COI)_gene_partial_cds_mitochondrial
--------------------------------------TACTGCCCTAAGTCTCCTCATCCGAGCAGAATTAGGCCAACCAGGTGCCCTGCTAGGCGACGACCAAATCTACAACGTAGTTGTTACCGCCCATGCTTTCGTAATAATCTTCTTCATAGTTATACCAATTATGATCGGAGGGTTCGGAAACTGACTAGTCCCCCTAATAATCGGAGCCCCAGACATAGCATTTCCCCGAATAAACAACATAAGCTTTTGACTTCTCCCCCCATCCTTCCTCCTCCTCCTAGCCTCTTCTACAGTAGAAGCTGGGGCAGGAACAGGTTGAACCGTCTACCCCCCTCTTGCCGGCAACCTAGCACACGCAGGAGCCTCAGTAGACTTAGCCATCTTCTCCCTACACCTCGCAGGAATCTCCTCAATCCTAGGGGCCATCAACTTCATTACAACAGCAATCAACATAAAACCACCTGCCCTTTCACAATACCAAACCCCCCTATTCGTCTGATCTGTCCTAATCACTGCAGTACTACTCCTACTATCCCTCCCCGTCCTTGCCGCTGGCATCACCATGCTCCTCACCGACCGTAACCTAAACACTACCTTCTTCGACCCAGCAGGAGGAGGAGACCCAGTACTATACCAACAC
>gi|197257253|gb|FJ028503.1|_Turdus_falcklandii_voucher_MACN-Or-ct_543_cytochrome_oxidase_subunit_1_(COI)_gene_partial_cds_mitochondrial
CTCTACCTAATTTTCGGCGCATGAGCCGGAATAGTGGGTACTGCCCTAAGTCTCCTCATCCGAGCAGAATTAGGCCAACCAGGTGCCCTGCTAGGCGACGACCAAATCTACAACGTAGTTGTTACCGCCCATGCTTTCGTAATAATCTTCTTCATAGTTATACCAATTATGATCGGAGGGTTCGGAAACTGACTAGTCCCCCTAATAATCGGAGCCCCAGACATAGCATTTCCCCGAATAAACAACATAAGCTTTTGACTTCTCCCCCCATCCTTCCTCCTCCTCCTAGCCTCTTCTACAGTAGAAGCTGGGGCAGGAACAGGTTGAACCGTCTACCCCCCTCTTGCCGGCAACCTAGCACACGCAGGAGCCTCAGTAGACTTAGCCATCTTCTCCCTACACCTCGCAGGAATCTCCTCAATCCTAGGGGCCATCAACTTCATTACAACAGCAATCAACATAAAACCACCTGCCCTTTCACAATACCAAACCCCCCTATTCGTCTGATCTGTCCTAATCACTGCAGTACTACTCCTACTATCCCTCCCCGTCCTTGCCGCTGGCATCACCATGCTCCTCACCGACCGTAACCTAAACACGACCTTCTTCGACCCAGCAGGAGGAGGAGACCCAGTACTATACCAACAC
>gi|197257249|gb|FJ028501.1|_Turdus_chiguanco_voucher_MACN-Or-ct_798_cytochrome_oxidase_subunit_1_(COI)_gene_partial_cds_mitochondrial
CTCTACCTAATCTTCGGTGCATGAGCCGGAATAGTGGGTACTGCCCTAAGTCTCCTCATCCGAGCAGAATTAGGTCAACCAGGTGCCCTACTAGGCGACGACCAAATCTACAACGTGGTCGTTACCGCCCATGCTTTCGTAATAATCTTCTTCATAGTTATACCAATCATAATCGGAGGGTTCGGAAACTGACTAGTCCCCCTAATAATCGGAGCCCCAGACATAGCATTCCCCCGAATAAACAACATAAGCTTTTGACTTCTCCCTCCATCCTTCCTTCTCCTCCTAGCCTCTTCTACAGTAGAAGCCGGGGCAGGAACAGGTTGAACCGTCTACCCTCCCCTCGCCGGCAACCTAGCGCACGCGGGAGCCTCAGTTGACTTAGCCATCTTCTCCTTACACCTCGCAGGAATCTCCTCAATCCTCGGGGCCATCAACTTCATCACAACAGCAATCAACATAAAACCACCTGCCCTCTCACAATACCAAACCCCCCTGTTCGTCTGATCAGTCCTAATTACTGCAGTGCTACTCCTACTATCCCTCCCCGTCCTTGCCGCTGGCATCACTATGCTCCTCACTGACCGTAACCTAAACACAACCTTCTTCGACCCAGCAGGAGGAGGGGACCCAGTACTATACCAACAC
>gi|197257245|gb|FJ028499.1|_Turdus_chiguanco_voucher_MACN-Or-ct_726_cytochrome_oxidase_subunit_1_(COI)_gene_partial_cds_mitochondrial
CTCTACCTAATCTTCGGTGCATGAGCCGGAATAGTGGGTACTGCCCTAAGTCTCCTCATCCGAGCAGAATTAGGTCAACCAGGTGCCCTACTAGGCGACGACCAAATCTACAACGTGGTCGTTACCGCCCATGCTTTCGTAATAATCTTCTTCATAGTTATACCAATCATAATCGGAGGGTTCGGAAACTGACTAGTCCCCCTAATAATCGGAGCCCCAGACATAGCATTCCCCCGAATAAACAACATAAGCTTTTGACTTCTCCCTCCATCCTTCCTTCTCCTCCTAGCCTCTTCTACAGTAGAAGCCGGGGCAGGAACAGGTTGAACCGTCTACCCTCCCCTCGCCGGCAACCTAGCGCACGCGGGAGCCTCAGTTGACTTAGCCATCTTCTCCTTACACCTCGCAGGAATCTCCTCAATCCTCGGGGCCATCAACTTCATCACAACAGCAATCAACATAAAACCACCTGCCCTCTCACAATACCAAACCCCCCTGTTCGTCTGATCAGTCCTAATTACTGCAGTGCTACTCCTACTATCCCTCCCCGTCCTTGCCGCTGGCATCACTATGCTCCTCACTGACCGTAACCTAAACACAACCTTCTTCGACCCAGCAGGAGGAGGGGACCCAGTACTATACCAACAC
>gi|197257241|gb|FJ028497.1|_Turdus_amaurochalinus_voucher_MACN-Or-ct_366_cytochrome_oxidase_subunit_1_(COI)_gene_partial_cds_mitochondrial
CTCTACATAATNTTCGGCGCATGAGCCGGAATAGTGGGTACTGCCCTAAGCCTCCTCATCCGAGCAGAATTAGGCCAACCAGGTGCCCTACTAGGCGACGACCAAATTTACAACGTGGTTGTCACCGCCCATGCTTTCGTAATAATCTTCTTCATAGTTATACCAATCATAATCGGAGGGTTCGGAAACTGACTAGTCCCCCTAATAATCGGAGCCCCAGACATAGCATTCCCCCGAATAAACAACATAAGCTTTTGACTCCTCCCCCCATCCTTCCTTCTCCTCCTAGCCTCTTCCACAGTAGAAGCTGGAGCAGGAACAGGCTGAACCGTCTATCCCCCCCTCGCCGGCAACCTAGCACACGCAGGGGCTTCAGTTGACTTAGCCATCTTCTCCCTACACCTCGCAGGAATCTCTTCAATCCTAGGGGCCATCAACTTCATCACAACAGCAATCAACATAAAACCACCTGCCCTCTCACAATATCAAACCCCCCTATTCGTCTGATCAGTCCTAATCACTGCAGTACTACTCCTACTATCCCTCCCTGTCCTTGCCGCCGGCATCACTATACTCCTCACCGACCGTAACCTAAACACAACCTTCTTCGACCCAGCAGGAGGAGGAGATCCAGTGCTATACCAACAC
>gi|197257237|gb|FJ028495.1|_Turdus_amaurochalinus_voucher_MACN-Or-ct_2173_cytochrome_oxidase_subunit_1_(COI)_gene_partial_cds_mitochondrial
CTCTACCTAATNTTCGGCGCATGAGCCGGAATAGTGGGTACTGCCCTAAGCCTCCTCATCCGAGCAGAATTAGGCCAACCAGGTGCCCTACTAGGCGACGACCAAACTTACAACGTGGTTGTCACCGCCCATGCTTTCGTAATAATCTTCTTCATAGTTATACCAATCATAATCGGAGGGTTCGGAAACTGACTAGTCCCCCTAATAATCGGAGCCCCAGACATAGCATTCCCCCGAATAAACAACATAAGCTTTTGACTCCTCCCCCCATCCTTCCTTCTCCTCCTAGCCTCTTCCACAGTAGAAGCTGGGGCAGGAACAGGCTGAACCGTCTATCCCCCCCTCGCCGGCAACCTAGCACACGCAGGGGCTTCAGTTGACTTAGCCATCTTCTCCCTACACCTCGCAGGAATCTCTTCAATCCTAGGGGCCATCAACTTCATCACAACAGCAATCAACATAAAACCACCTGCCCTCTCACAATATCAAACCCCCCTATTCGTCTGATCAGTCCTAATCACTGCAGTACTACTCCTACTATCCCTCCCTGTCCTTGCCGCCGGCATCACTATACTCCTCACCGACCGTAACCTAAACACAACCTTCTTCGACCCAGCAGGAGGAGGAGATCCAGTGCTATACCAACAC
>gi|197257233|gb|FJ028493.1|_Turdus_amaurochalinus_voucher_MACN-Or-ct_1537_cytochrome_oxidase_subunit_1_(COI)_gene_partial_cds_mitochondrial
CTCTACCTAATCTTCGGCGCATGAGCCGGGATAGTGGGTACTGCCCTAAGCCTCCTCATCCGAGCAGAACTAGGCCAACCAGGTGCCCTACTAGGCGACGACCAAATTTACAACGTGGTTGTCACCGCCCATGCTTTCGTAATAATCTTCTTCATAGTTATACCAATCATAATCGGAGGGTTCGGAAACTGACTAGTCCCCCTAATAATCGGAGCCCCAGACATAGCATTCCCCCGAATAAACAACATAAGCTTTTGACTCCTCCCCCCATCCTTCCTTCTCCTCCTAGCCTCTTCCACAGTAGAAGCTGGGGCAGGAACAGGCTGAACCGTCTATCCCCCCCTCGCCGGCAACCTAGCACACGCAGGGGCTTCAGTTGACTTAGCCATCTTTTCCCTACACCTCGCAGGAATCTCTTCAATCCTAGGGGCCATCAACTTCATCACAACAGCAATCAACATAAAACCACCTGCCCTCTCACAATATCAAACCCCCCTATTCGTCTGATCAGTCCTAATCACTGCAGTACTACTCCTACTATCCCTCCCTGTCCTTGCCGCCGGCATTACTATACTCCTCACCGACCGTAACCTAAACACAACCTTCTTCGACCCAGCAGGAGGAGGAGATCCAGTGCTATACCAACAC
>gi|197257229|gb|FJ028491.1|_Turdus_amaurochalinus_voucher_MACN-Or-ct_975_cytochrome_oxidase_subunit_1_(COI)_gene_partial_cds_mitochondrial
CTCTACCTAATCTTCGGCGCATGAGCCGGAATAGTGGGTACTGCCCTAAGCCTCCTCATCCGAGCAGAATTAGGCCAACCAGGTGCCCTACTAGGCGACGACCAAATTTACAACGTGGTTGTCACCGCCCATGCTTTCGTAATAATCTTCTTCATAGTTATACCAATCATAATCGGAGGGTTCGGAAACTGACTAGTCCCCCTAATAATCGGAGCCCCAGACATAGCATTCCCCCGAATAAACAACATAAGCTTTTGACTCCTCCCCCCATCCTTCCTTCTCCTCCTAGCCTCTTCCACAGTAGAAGCTGGGGCAGGAACAGGCTGAACCGTCTATCCCCCCCTCGCCGGCAACCTAGCACACGCAGGGGCTTCAGTTGACTTAGCCATCTTTTCCCTACACCTCGCAGGAATCTCTTCAATCCTAGGGGCCATCAACTTCATCACAACAGCAATCAACATAAAACCACCTGCCCTCTCACAATATCAAACCCCCCTATTCGTCTGATCAGTCCTAATCACTGCAGTACTACTCCTACTATCCCTCCCTGTCCTTGCCGCCGGCATCACTATACTCCTCACCGACCGTAACCTAAACACAACCTTCTTCGACCCAGCAGGAGGAGGAGATCCAGTGCTATACCAACAC
>gi|197257225|gb|FJ028489.1|_Turdus_amaurochalinus_voucher_MACN-Or-ct_923_cytochrome_oxidase_subunit_1_(COI)_gene_partial_cds_mitochondrial
CTCTACCTAATCTTCGGCGCATGAGCCGGAATAGTGGGTACTGCCCTAAGCCTCCTCATCCGAGCAGAATTAGGCCAACCAGGTGCCCTACTAGGCGACGACCAAATTTACAACGTGGTTGTCACCGCCCATGCTTTCGTAATAATCTTCTTCATAGTTATACCAATCATAATCGGAGGGTTCGGAAACTGACTAGTCCCCCTAATAATCGGAGCCCCAGACATAGCATTCCCCCGAATAAACAACATAAGCTTTTGACTCCTCCCCCCATCCTTCCTTCTCCTCCTAGCCTCTTCCACAGTAGAAGCTGGGGCAGGAACAGGCTGAACCGTCTATCCCCCCCTCGCCGGCAACCTAGCACACGCAGGGGCTTCAGTTGACTTAGCCATCTTTTCCCTACACCTCGCAGGAATCTCTTCAATCCTAGGGGCCATCAACTTCATCACAACAGCAATCAACATAAAACCACCTGCCCTCTCACAATATCAAACCCCCCTATTCGTCTGATCAGTCCTAATCACTGCAGTACTACTCCTACTATCCCTCCCTGTCCTTGCCGCCGGCATCACTATACTCCTCACCGACCGTAACCTAAACACAACCTTCTTCGACCCAGCAGGAGGAGGAGATCCAGTGCTATACCAACAC
>gi|197257221|gb|FJ028487.1|_Turdus_albicollis_voucher_MACN-Or-ct_2968_cytochrome_oxidase_subunit_1_(COI)_gene_partial_cds_mitochondrial
CTCTATCTAATCTTCGGCGCATGAGCCGGAATAGTAGGTACCGCCCTAAGCCTCCTCATCCGAGCAGAATTAGGCCAACCAGGTGCCCTGCTAGGCGACGACCAAATCTACAACGTGGTTGTTACCGCCCATGCTTTCGTAATAATCTTCTTCATAGTTATACCAATCATAATCGGAGGGTTCGGAAACTGACTAGTACCCCTAATAATCGGAGCCCCAGACATAGCATTTCCCCGAATAAACAACATAAGCTTTTGACTCCTCCCCCCATCCTTCCTTCTCCTCTTAGCCTCTTCCACAGTAGAAGCCGGGGCAGGAACAGGTTGAACCGTCTACCCTCCCCTCGCCGGCAACCTAGCACACGCAGGGGCTTCAGTTGACTTAGCCATCTTCTCCCTTCACCTCGCAGGAATCTCCTCAATCCTAGGGGCCATCAACTTCATCACAACAGCAATCAACATAAAACCCCCTGCCCTCTCACAGTACCAAACCCCTCTATTCGTCTGATCAGTCCTGATTACTGCAGTGCTTCTCCTACTATCCCTCCCCGTCCTTGCCGCTGGCATCACCATGCTCCTCACCGACCGTAACCTAAACACGACCTTCTTCGACCCAGCAGGAGGAGGAGACCCAGTACTATACCAACAT
>gi|197257217|gb|FJ028485.1|_Trogon_surrucura_voucher_MACN-Or-ct_2934_cytochrome_oxidase_subunit_1_(COI)_gene_partial_cds_mitochondrial
CTATACTTAATCTTCGGAGCATGGGCTGGTATGATTGGTACCTCCCTAAGCCTGCTCATCCGCGCAGAACTAGGTCAACCCGGAACCCTTCTAGGAGATGACCAAATTTACAACGTTATCGTTACCGCTCATGCTTTTGTCATAATCTTCTTTATGGTTATGCCAATTATAATCGGAGGCTTTGGAAACTGATTAGTTCCACTTATAATTGGTGCCCCGGACATAGCCTTCCCACGCATAAATAACATAAGCTTCTGACTACTTCCCCCGTCCTTCCTACTTCTACTAGCTTCTTCCACAGTAGAAGCCGGGGCAGGAACAGGGTGAACCGTATACCCGCCCCTTGCTGGCAACCTAGCTCATGCCGGTGCTTCTGTAGACATAGCCATCTTTTCTCTCCACCTAGCAGGTGTGTCCTCCATTCTAGGCGCAATTAACTTTATTACGACAGCCATCAACATAAAACCCCCAGCCCTATCTCAGTACCAAACCCCACTATTCGTCTGATCGGTCCTTATCACCGCAGTTCTCCTTCTCCTCTCACTCCCTGTCCTAGCTGCAGGAATCACAATACTCCTAACAGACCGAAATCTGAACACTACCTTCTTTGACCCAGCAGGAGGGGGTGACCCCATTCTCTACCAGCAT
>gi|197257213|gb|FJ028483.1|_Trogon_surrucura_voucher_MACN-Or-ct_1637_cytochrome_oxidase_subunit_1_(COI)_gene_partial_cds_mitochondrial
CTATACTTAATCTTCGGAGCATGGGCTGGTATGATTGGTACCTCCCTAAGCCTGCTCATCCGCGCAGAACTAGGTCAACCCGGAACCCTTCTAGGAGATGACCAAATTTACAACGTTATCGTTACCGCTCATGCTTTTGTCATAATCTTCTTTATGGTTATGCCAATTATAATCGGAGGCTTTGGAAACTGATTAGTTCCACTTATAATTGGTGCCCCGGACATAGCCTTCCCACGCATAAATAACATAAGCTTCTGACTACTTCCCCCGTCCTTCCTACTTCTACTAGCTTCTTCCACAGTAGAAGCCGGGGCAGGAACAGGGTGAACCGTATACCCGCCCCTTGCTGGCAACCTAGCTCATGCCGGTGCTTCTGTAGACATAGCCATCTTTTCTCTCCACCTAGCAGGTGTGTCCTCCATTCTAGGCGCAATTAACTTTATTACGACAGCCATCAACATAAAACCCCCAGCCCTATCTCAGTACCAAACCCCACTATTCGTCTGATCGGTCCTTATCACCGCAGTTCTCCTTCTCCTCTCACTCCCTGTCCTAGCTGCAGGAATCACAATACTCCTAACAGACCGAAATCTGAACACTACCTTCTTTGACCCAGCAGGAGGGGGTGACCCCATTCTCTACCAGCAT
>gi|197257209|gb|FJ028481.1|_Trogon_surrucura_voucher_MACN-Or-ct_1705_cytochrome_oxidase_subunit_1_(COI)_gene_partial_cds_mitochondrial
CTATACTTAATCTTCGGAGCATGGGCTGGTATGATTGGTACCTCCCTAAGCCTGCTCATCCGCGCAGAACTAGGTCAACCCGGAACCCTTCTAGGAGATGACCAAATTTACAACGTTATCGTTACCGCTCATGCTTTTGTCATAATCTTCTTTATGGTTATGCCAATTATAATCGGAGGCTTTGGAAACTGATTAGTTCCACTTATAATTGGTGCCCCGGACATAGCCTTCCCACGCATAAATAACATAAGCTTCTGACTACTTCCCCCGTCCTTCCTACTTCTACTAGCTTCTTCCACAGTAGAAGCCGGGGCAGGAACAGGGTGAACCGTATACCCGCCCCTTGCTGGCAACCTAGCTCATGCCGGTGCTTCTGTAGACATAGCCATCTTTTCTCTCCACCTAGCAGGTGTGTCCTCCATTCTAGGCGCAATTAACTTTATTACGACAGCCATCAACATAAAACCCCCAGCCCTATCTCAGTACCAAACCCCACTATTCGTCTGATCGGTCCTTATCACCGCAGTTCTCCTTCTCCTCTCACTCCCTGTCCTAGCTGCAGGAATCACAATACTCCTAACAGACCGAAATCTGAACACTACCTTCTTTGACCCAGCAGGAGGGGGTGACCCCATTCTCTACCAGCAT
>gi|197257205|gb|FJ028479.1|_Troglodytes_solstitialis_voucher_MACN-Or-ct_785_cytochrome_oxidase_subunit_1_(COI)_gene_partial_cds_mitochondrial
CTATACCTAATCTTTGGCGCATGAGCCGGGATAGTAGGCACTGCCCTCAGCCTCCTCATCCGAGCAGAACTGGGCCAACCTGGCGCCTTACTTGGAGACGACCAAGTCTACAATGTAATCGTCACAGCCCACGCTTTCGTAATAATTTTCTTCATAGTGATACCAATTATGATCGGAGGATTCGGTAACTGACTAGTCCCCCTAATAATCGGAGCCCCCGACATAGCATTCCCCCGAATAAACAACATAAGCTTCTGACTCCTCCCCCCCTCCTTCCTGCTACTCCTAGCCTCCTCCACCGTTGAAGCAGGGGTCGGGACAGGCTGAACAGTATACCCCCCACTAGCAGGCAACCTAGCTCACGCCGGGGCATCAGTCGACCTAGCCATCTTCTCCCTACACCTGGCAGGTATCTCCTCCATCCTAGGCGCAATCAACTTCATCACAACAGCAATCAACATAAAACCTCCTGCCCTGTCCCAATACCAAACACCCCTATTCGTCTGATCCGTACTAATTACTGCAGTCCTCCTCCTTCTCTCTCTTCCTGTACTTGCCGCAGGCATCACCATGCTGCTAACAGATCGAAACCTCAACACCACATTCTTCGACCCCGCAGGAGGCGGAGACCCTGTTCTCTACCAACAC
>gi|197257201|gb|FJ028477.1|_Troglodytes_solstitialis_voucher_MACN-Or-ct_765_cytochrome_oxidase_subunit_1_(COI)_gene_partial_cds_mitochondrial
CTATACNTAATCTTTGGCGCATGAGCCGGGATAGTAGGCACTGCCCTCAGCCTCCTCATCCGAGCAGAACTGGGCCAACCTGGCGCCTTACTTGGAGACGACCAAGTCTACAATGTAATCGTCACAGCCCACGCTTTCGTAATAATTTTCTTCATAGTGATACCAATTATGATCGGAGGATTCGGTAACTGACTAGTCCCCCTAATAATCGGAGCCCCCGACATAGCATTCCCCCGAATAAACAACATAAGCTTCTGACTCCTCCCCCCCTCCTTCCTGCTACTCCTAGCCTCCTCCACCGTTGAAGCAGGGGTCGGGACAGGCTGAACAGTATACCCCCCACTAGCAGGCAACCTAGCTCACGCCGGGGCATCAGTCGACCTAGCCATCTTCTCCCTACACCTGGCAGGTATCTCCTCCATCCTAGGCGCAATCAACTTCATCACAACAGCAATCAACATAAAACCTCCTGCCCTGTCCCAATACCAAACACCCCTATTCGTCTGATCCGTACTAATTACTGCAGTCCTCCTCCTTCTCTCTCTTCCTGTACTTGCCGCAGGCATCACCATGCTGCTAACAGATCGAAACCTCAACACCACATTCTTCGACCCCGCAGGAGGCGGAGACCCTGTTCTCTACCAACAC
>gi|197257197|gb|FJ028475.1|_Troglodytes_aedon_voucher_MACN-Or-ct_2599_cytochrome_oxidase_subunit_1_(COI)_gene_partial_cds_mitochondrial
CTATACCTAATCTTCGGCGCATGAGCCGGGATGGTAGGTACTGCCCTTAGCCTCCTCATCCGAGCAGAGCTGGGCCAACCTGGCGCCTTACTCGGAGACGACCAAGTCTACAATGTGATCGTCACAGCCCATGCTTTCGTGATAATCTTCTTCATAGTTATACCAATCATAATCGGAGGATTCGGCAACTGACTAGTCCCCTTAATGATCGGAGCCCCCGACATAGCATTCCCCCGAATAAACAACATAAGCTTCTGACTTCTTCCCCCCTCTTTCCTACTACTCCTAGCCTCCTCCACCGTTGAAGCAGGGGTCGGAACAGGTTGAACAGTATACCCCCCACTAGCAGGCAACCTAGCCCATGCCGGGGCATCAGTCGACCTGGCTATCTTCTCCCTCCACCTAGCAGGTATCTCCTCCATTCTAGGCGCAATCAATTTCATCACAACAGCAATCAACATAAAACCCCCCGCCCTATCCCAATACCAAACACCCCTATTCGTCTGATCCGTCCTAATCACTGCAGTCCTCCTGCTCCTCTCCCTCCCCGTACTTGCCGCAGGCATCACCATGCTACTAACAGATCGAAACCTCAACACCACATTCTTCGACCCCGCAGGAGGCGGAGACCCTGTCCTCTACCAGCAC
>gi|197257193|gb|FJ028473.1|_Troglodytes_aedon_voucher_MACN-Or-ct_1895_cytochrome_oxidase_subunit_1_(COI)_gene_partial_cds_mitochondrial
CTATACCTAATNTTCGGCGCATGAGCCGGGATGGTAGGTACTGCCCTTAGCCTCCTTATCCGAGCAGAGCTGGGCCAACCTGGCGCTTTACTCGGAGACGACCAAGTCTACAATGTAATCGTCACAGCCCATGCTTTCGTGATAATCTTCTTCATAGTTATACCAATCATAATCGGAGGATTCGGCAACTGACTAGTCCCCTTAATAATCGGAGCCCCCGACATAGCATTCCCCCGAATAAACAACATAAGCTTCTGACTCCTTCCCCCCTCCTTCCTGCTACTCCTAGCCTCCTCCACCGTTGAAGCAGGAGTCGGAACAGGTTGAACAGTGTACCCCCCACTAGCGGGCAACCTAGCCCATGCCGGAGCATCGGTCGACCTAGCTATCTTCTCCCTGCACTTAGCAGGTATCTCTTCCATTCTAGGCGCAATCAATTTTATCACAACAGCAATCAACATAAAACCCCCCGCCCTATCTCAATACCAAACACCCCTATTCGTCTGATCCGTCCTAATCACTGCAGTCCTCCTACTCCTCTCCCTCCCCGTACTTGCCGCAGGCATCACCATGCTACTAACAGATCGAAACCTCAACACCACATTCTTCGACCCCGCAGGAGGCGGAGACCCTGTCCTCTACCAGCAC
>gi|197257189|gb|FJ028471.1|_Troglodytes_aedon_voucher_MACN-Or-ct_1860_cytochrome_oxidase_subunit_1_(COI)_gene_partial_cds_mitochondrial
CNANACCTAATCTTCGGCGCATGAGCCGGGATGGTAGGTACTGCCCTTAGCCTCCTCATCCGAGCAGAACTGGGCCAACCTGGCGCCTTACTCGGAGACGACCAAGTCTACAATGTAATCGTCACAGCCCATGCTTTCGTGATAATCTTCTTCATAGTTATACCAATCATAATCGGAGGATTCGGCAACTGACTAGTCCCCTTAATAATCGGAGCCCCCGACATAGCATTCCCCCGAATAAACAACATAAGCTTCTGACTCCTTCCCCCCTCCTTCCTACTACTCCTAGCCTCCTCCACCGTTGAAGCAGGAGTCGGAACAGGTTGAACAGTGTACCCCCCACTAGCGGGCAACCTAGCCCACGCCGGGGCGTCGGTCGACCTAGCTATCTTCTCCCTGCACTTAGCAGGTATCTCTTCCATTCTAGGCGCAATCAATTTTATCACAACAGCAATCAACATAAAACCCCCCGCCCTATCTCAATACCAAACACCCCTATTCGTCTGATCCGTCCTAATCACTGCAGTCCTCCTACTCCTCTCCCTCCCCGTACTTGCCGCAGGCATCACCATGCTACTAACAGATCGAAACCTCAACACCACATTCTTCGACCCCGCAGGAGGCGGAGACCCTGTCCTCTACCAGCAC
>gi|197257185|gb|FJ028469.1|_Troglodytes_aedon_voucher_MACN-Or-ct_1902_cytochrome_oxidase_subunit_1_(COI)_gene_partial_cds_mitochondrial
CTATACNTAATNTTCGGCGCATGAGCCGGGATGGTAGGTACTGCCCTTAGCCTCCTCATCCGAGCAGAACTGGGCCAACCTGGCGCCTTACTCGGAGACGACCAAGTCTACAATGTAATCGTCACAGCCCATGCTTTCGTGATAATCTTCTTCATAGTTATACCAATCATAATCGGAGGATTCGGCAACTGACTAGTCCCCTTAATAATCGGAGCCCCCGACATAGCATTCCCCCGAATAAACAACATAAGCTTCTGACTCCTTCCCCCCTCCTTCCTACTACTCCTAGCCTCCTCCACCGTTGAAGCAGGAGTCGGAACAGGTTGAACAGTGTACCCCCCACTAGCGGGCAACCTAGCCCATGCCGGGGCATCGGTCGACCTAGCTATCTTCTCCCTGCACTTAGCAGGTATCTCTTCCATTCTAGGCGCAATCAATTTTATCACAACAGCAATCAACATAAAACCCCCCGCCCTATCTCAATACCAAACACCCCTATTCGTCTGATCCGTCCTAATCACTGCAGTCCTCCTACTCCTCTCCCTCCCCGTACTTGCCGCAGGCATCACCATGCTACTAACAGATCGAAACCTCAACACCACATTCTTCGACCCCGCAGGAGGCGGAGACCCTGTCCTCTACCAGCAC
>gi|197257181|gb|FJ028467.1|_Troglodytes_aedon_voucher_MACN-Or-ct_2893_cytochrome_oxidase_subunit_1_(COI)_gene_partial_cds_mitochondrial
CTATACCTAATCTTCGGCGCATGAGCCGGAATGGTAGGCACTGCCCTTAGCCTCCTCATCCGGGCAGAACTAGGCCAACCTGGCGCCCTACTCGGAGATGACCAAGTCTACAATGTAATCGTCACAGCCCACGCTTTCGTGATAATCTTCTTCATAGTTATACCAATCATAATCGGAGGATTCGGCAACTGACTAGTCCCCCTAATAATCGGAGCCCCCGACATAGCATTCCCCCGAATAAACAACATAAGCTTCTGACTCCTCCCCCCTTCTTTCCTACTACTCCTAGCCTCCTCCACCGTTGAAGCAGGGGCCGGAACAGGTTGAACAGTATACCCCCCACTAGCAGGCAACCTGGCCCATGCCGGAGCATCAGTCGACCTAGCTATCTTCTCCCTGCACCTAGCGGGTATCTCTTCCATTCTAGGCGCAATCAATTTCATCACAACAGCAATCAACATAAAACCCCCCGCCCTATCTCAATACCAAACACCCCTATTCGTCTGATCCGTCCTAATCACTGCAGTCCTCCTACTCCTCTCCCTCCCCGTACTTGCCGCAGGCATTACCATGCTACTAACAGATCGAAACCTCAACACCACATTCTTCGACCCCGCAGGAGGCGGAGACCCTGTCCTCTACCAACAC
>gi|197257177|gb|FJ028465.1|_Troglodytes_aedon_voucher_MACN-Or-ct_2680_cytochrome_oxidase_subunit_1_(COI)_gene_partial_cds_mitochondrial
CTATACCTAATCTTCGGCGCATGAGCCGGGATGGTAGGTACTGCCCTTAGCCTCCTCATCCGAGCAGAGCTGGGCCAACCTGGCGCCTTACTCGGAGACGACCAAGTCTACAATGTGATCGTCACAGCCCATGCTTTCGTGATAATCTTCTTCATAGTTATACCAATCATGATCGGAGGATTCGGCAACTGACTAGTCCCCTTAATGATCGGAGCCCCCGACATAGCATTCCCCCGAATAAACAACATAAGCTTCTGACTTCTTCCCCCCTCTTTCCTACTACTCCTAGCCTCCTCCACCGTTGAAGCAGGGGTCGGAACAGGTTGAACAGTATACCCCCCACTAGCAGGCAACCTAGCCCATGCCGGGGCATCAGTCGACCTGGCTATCTTCTCCCTCCACCTAGCAGGTATCTCCTCCATTCTAGGCGCAATCAATTTCATCACAACAGCAATCAACATAAAACCCCCCGCCCTATCCCAATACCAAACACCCCTATTCGTCTGATCCGTCCTAATCACTGCAGTCCTCCTGCTCCTCTCCCTCCCCGTACTTGCCGCAGGCATCACCATGCTACTAACAGATCGAAACCTCAACACCACATTCTTCGACCCCGCAGGAGGCGGAGACCCTGTCCTCTACCAGCAC
>gi|197257173|gb|FJ028463.1|_Troglodytes_aedon_voucher_MACN-Or-ct_286_cytochrome_oxidase_subunit_1_(COI)_gene_partial_cds_mitochondrial
CTATACCTAATCTTCGGCGCATGAGCCGGGATGGTAGGTACTGCCCTTAGCCTCCTCATCCGAGCAGAGCTGGGCCAACCTGGCGCCTTACTCGGAGACGACCAAGTCTACAATGTAATCGTCACAGCCCATGCTTTCGTGATAATCTTCTTCATAGTTATACCAATCATAATCGGAGGATTCGGCAACTGACTAGTCCCCTTAATGATCGGAGCCCCCGACATAGCATTCCCCCGAATAAACAACATAAGCTTCTGACTTCTTCCCCCCTCTTTCCTACTACTCCTAGCCTCCTCCACCGTTGAAGCAGGGGTCGGAACAGGTTGAACAGTATACCCCCCACTAGCAGGCAACCTAGCCCATGCCGGGGCATCAGTCGACCTGGCTATCTTCTCCCTCCACCTAGCAGGTATCTCCTCCATTCTAGGCGCAATCAATTTCATCACAACAGCAATCAACATAAAACCCCCCGCCCTATCCCAATACCAAACACCCCTATTCGTCTGATCCGTCCTAATCACTGCAGTCCTCCTGCTCCTCTCCCTCCCCGTACTTGCCGCAGGCATCACCATGCTACTAACAGATCGAAACCTCAACACCACATTCTTCGACCCCGCAGGAGGCGGAGACCCTGTCCTCTACCAGCAC
>gi|197257169|gb|FJ028461.1|_Troglodytes_aedon_voucher_MACN-Or-ct_055_cytochrome_oxidase_subunit_1_(COI)_gene_partial_cds_mitochondrial
CTATACCTAATCTTCGGCGCATGAGCCGGGATGGTAGGTACTGCCCTTAGCCTCCTCATCCGAGCAGAACTGGGCCAACCTGGCGCCTTACTCGGAGACGACCAAGTCTACAATGTAATCGTCACAGCCCATGCTTTCGTGATAATCTTCTTCATAGTTATACCAATCATAATCGGAGGATTCGGCAACTGACTAGTCCCCTTAATAATCGGAGCCCCCGACATAGCATTCCCCCGAATAAACAACATAAGCTTCTGACTCCTTCCCCCCTCCTTCCTACTACTCCTAGCCTCCTCCACCGTTGAAGCAGGAGCCGGAACAGGTTGAACAGTGTACCCCCCACTAGCGGGCAACCTAGCCCATGCCGGGGCATCGGTCGACCTAGCTATCTTCTCCCTGCACTTAGCAGGTATCTCTTCCATTCTAGGCGCAATCAATTTTATCACAACAGCAATCAACATAAAACCCCCCGCCCTATCTCAATACCAAACACCCCTATTCGTCTGATCCGTCCTAATCACTGCAGTCCTCCTACTCCTCTCCCTCCCCGTACTTGCCGCAGGCATCACCATGCTACTAACAGATCGAAACCTCAACACCACATTCTTCGACCCCGCAGGAGGCGGAGACCCTGTCCTCTACCAGCAC
>gi|197257165|gb|FJ028459.1|_Troglodytes_aedon_voucher_MACN-Or-ct_695_cytochrome_oxidase_subunit_1_(COI)_gene_partial_cds_mitochondrial
CTATACCTAATCTTCGGCGCATGAGCCGGGATGGTAGGTACTGCCCTTAGCCTCCTCATCCGAGCAGAGCTGGGCCAACCTGGCGCCTTACTCGGAGACGACCAAGTCTACAATGTGATCGTCACAGCCCATGCTTTCGTGATAATCTTCTTCATAGTTATACCAATCATAATCGGAGGATTCGGCAACTGACTAGTCCCCTTAATGATCGGAGCCCCCGACATAGCATTCCCCCGAATAAACAACATAAGCTTCTGACTTCTTCCCCCCTCTTTCCTACTACTCCTAGCCTCCTCCACCGTTGAAGCAGGGGTCGGAACAGGTTGAACAGTATACCCCCCACTAGCAGGCAACCTAGCCCATGCCGGGGCATCAGTCGACCTGGCTATCTTCTCCCTCCACCTAGCAGGTATCTCCTCCATTCTAGGCGCAATCAATTTCATCACAACAGCAATCAACATAAAACCCCCCGCCCTATCCCAATACCAAACACCCCTATTCGTCTGATCCGTCCTAATCACTGCAGTCCTCCTGCTCCTCTCCCTCCCCGTACTTGCCGCAGGCATCACCATGCTACTAACAGATCGAAACCTCAACACCACATTCTTCGACCCCGCAGGAGGCGGAGACCCTGTCCTCTACCAGCAC
>gi|197257161|gb|FJ028457.1|_Tringa_solitaria_voucher_MACN-Or-ct_1750_cytochrome_oxidase_subunit_1_(COI)_gene_partial_cds_mitochondrial
CTATATCTAATCTTCGGAGCATGAGCTGGCATAGTTGGAACCGCCCTCAGCCTCCTCATCCGCGCAGAACTTGGACAACCTGGGACTCTACTAGGAGATGATCAAATTTATAATGTAATCGTCACTGCCCATGCCTTCGTAATAATTTTCTTTATAGTAATACCAATCATGATCGGTGGTTTCGGAAATTGACTAGTCCCACTCATAATCGGCGCCCCCGACATAGCATTCCCCCGTATAAACAACATAAGCTTCTGACTACTTCCCCCATCATTTCTTTTACTTTTAGCATCTTCCACAGTAGAAGCTGGGGCCGGAACAGGGTGAACAGTTTATCCCCCCCTCGCTGGTAACCTAGCCCATGCCGGTGCCTCAGTAGACCTAGCCATCTTCTCCCTTCACTTAGCAGGTGTTTCCTCTATCCTAGGTGCTATCAACTTCATTACAACCGCCATCAACATAAAACCCCCAGCCCTATCCCAATACCAAACCCCACTATTCGTATGATCAGTACTTATCACTGCCGTCCTTCTCCTACTCTCTCTCCCAGTCCTCGCTGCCGGCATTACTATACTACTAACAGACCGAAACCTAAATACTACATTCTTTGATCCAGCTGGAGGAGGAGACCCAATCCTGTACCAACAC
>gi|197257157|gb|FJ028455.1|_Tringa_melanoleuca_voucher_MACN-Or-ct_160_cytochrome_oxidase_subunit_1_(COI)_gene_partial_cds_mitochondrial
-------------------------CTGGCATAATCGGAACTGCCCTCAGCCTCCTCATTCGCGCAGAATTAGGTCAACCGGGAACCCTATTAGGAGACGACCAAATCTACAATGTAATCGTCACCGCCCATGCCTTCGTAATAATTTTCTTCATAGTAATACCAATTATAATTGGTGGCTTCGGAAACTGACTAGTCCCACTCATAATCGGCGCCCCCGATATAGCATTTCCACGTATAAACAACATAAGCTTCTGACTACTTCCCCCATCATTCCTATTACTACTAGCATCCTCAACAGTAGAAGCCGGAGCTGGTACAGGGTGGACAGTATATCCCCCTCTTGCTGGTAACCTAGCTCATGCTGGCGCCTCAGTAGACCTCGCTATCTTCTCTCTTCACCTAGCAGGTGTCTCCTCCATCCTTGGTGCTATCAACTTCATCACAACCGCCATCAACATAAAACCCCCAGCTCTCTCCCAATATCAAACCCCTCTATTTGTATGATCAGTTCTTATTACCGCCGTCCTTCTTCTACTCTCCCTTCCAGTCCTTGCCGCTGGTATCACCATATTACTAACAGACCGAAACTTAAACACCACATTCTTCGATCCGGCTGGAGGAGGAGATCCANTCCTATACCAACAC
>gi|197257153|gb|FJ028453.1|_Tringa_flavipes_voucher_MACN-Or-ct_1743_cytochrome_oxidase_subunit_1_(COI)_gene_partial_cds_mitochondrial
CTATACCTAATTTTCGGTGCATGAGCTGGTATAATTGGAACCGCCCTCAGCCTCCTCATTCGCGCAGAATTAGGTCAACCGGGAACCCTACTGGGAGACGACCAAATCTATAATGTAATCGTTACTGCCCATGCCTTCGTAATAATTTTCTTCATAGTGATACCGATTATAATTGGTGGCTTCGGAAATTGACTAGTCCCACTCATAATCGGCGCCCCCGACATAGCATTCCCTCGTATAAACAACATAAGCTTTTGACTACTCCCCCCATCATTCCTATTACTTCTAGCATCCTCAACAGTAGAGGCCGGAGCTGGTACAGGATGAACAGTGTATCCTCCTCTCGCAGGCAATCTAGCTCATGCCGGTGCTTCAGTAGACCTAGCCATCTTCTCCCTCCACTTAGCAGGTGTCTCCTCTATCCTTGGTGCTATTAACTTCATCACAACTGCTATCAACATAAAACCCCCAGCCCTCTCCCAATACCAAACCCCACTATTCGTATGATCCGTACTTATTACTGCCGTCCTTCTCCTACTTTCCCTTCCAGTCCTCGCTGCCGGTATCACTATACTACTAACAGATCGAAACCTAAACACCACATTCTTCGATCCAGCCGGAGGAGGAGATCCAGTCCTATACCAACAT
>gi|197257149|gb|FJ028451.1|_Trichothraupis_melanops_voucher_MACN-Or-ct_1953_cytochrome_oxidase_subunit_1_(COI)_gene_partial_cds_mitochondrial
CTATACTTAATCTTCGGTGCATGGGCCGGAATAGTAGGTACCGCCCTAAGCCTCCTCATCCGAGCAGAACTGGGCCAACCTGGAGCACTCCTAGGAGACGACCAAGTTTACAATGTGGTCGTCACAGCCCATGCCTTCGTAATAATCTTCTTTATAGTCATGCCAATTATAATCGGAGGATTCGGAAACTGACTAGTCCCCCTAATAATTGGAGCCCCAGACATAGCATTCCCACGAATGAACAACATAAGTTTCTGACTACTCCCCCCATCCTTTCTACTCCTCCTAGCATCTTCCACAGTCGAAGCAGGCGTTGGTACAGGTTGAACAGTGTACCCCCCACTAGCTGGTAACTTAGCCCACGCCGGAGCCTCAGTCGATCTAGCAATCTTCTCCCTACACTTAGCCGGCATCTCCTCAATCTTAGGAGCAATTAATTTCATCACAACAGCAATCAACATAAAACCCCCTGCCCTCTCACAATACCAAACCCCTCTGTTCGTCTGATCCGTCCTAATCACTGCAGTCCTCCTACTACTATCTCTCCCAGTCCTTGCTGCAGGAATCACAATACTCCTCACAGACCGCAACCTCAACACTACATTCTTTGACCCTGCCGGAGGAGGAGACCCTGTCCTATACCAACAC
>gi|197257145|gb|FJ028449.1|_Trichothraupis_melanops_voucher_MACN-Or-ct_2851_cytochrome_oxidase_subunit_1_(COI)_gene_partial_cds_mitochondrial
CTATACTTAATCTTCGGTGCATGGGCCGGAATAGTAGGTACCGCCCTAAGCCTCCTCATCCGAGCAGAACTGGGCCAACCTGGAGCACTCCTAGGAGACGACCAAGTTTACAATGTGGTCGTCACAGCCCATGCCTTCGTAATAATCTTCTTTATAGTCATGCCAATTATAATCGGAGGATTCGGAAACTGACTAGTCCCCCTAATAATTGGAGCCCCAGACATAGCATTCCCACGAATGAACAACATAAGTTTCTGACTACTCCCCCCATCCTTTCTACTCCTCCTAGCATCTTCCACAGTCGAAGCAGGCGTTGGTACAGGTTGAACAGTGTACCCCCCACTAGCTGGTAACTTAGCCCACGCCGGAGCCTCAGTCGATCTAGCAATCTTCTCCCTACACTTAGCCGGCATCTCCTCAATCTTAGGAGCAATTAATTTCATCACAACAGCAATCAACATAAAACCCCCTGCCCTCTCACAATACCAAACCCCTCTGTTCGTCTGATCCGTCCTAATCACTGCAGTCCTCCTACTACTATCTCTCCCAGTCCTTGCTGCAGGAATCACAATACTCCTCACAGACCGCAACCTCAACACTACATTCTTTGACCCTGCCGGAGGAGGAGACCCTGTCCTATACCAACAC
>gi|197257141|gb|FJ028447.1|_Tinamotis_pentlandii_voucher_MACN-Or-ct_1203_cytochrome_oxidase_subunit_1_(COI)_gene_partial_cds_mitochondrial
TTATACCTAATTTTCGGCNCATGAGCCGGCATAGTAGGCACCGCCCTCAGCCTCCTAATCCGTGCCGAGCTGGGTCAACCCGGCACCCTCTTAGGCGACGACCAAGTCTACAATGTCATCGTCACCGCTCACGCCTTCGTCATAATCTTCTTCATAGTTATACCTGTCATAATCGGAGGATTCGGGAACTGACTAGTCCCCCTCATACTGGGTGCCCCAGACATGGCCTTCCCACGGATAAATAACATAAGCTTCTGACTCCTACCCCCATCATTTCTTCTCCTCATGGCCTCATCCACAATTGAAGCCGGAGTGGGCACCGGCTGAACAGTCTACCCGCCCCTCGCTGGCAACCTCGCCCACGCAGGCGCTTCAGTCGACCTCGCCATCTTCTCCCTTCACCTAGCAGGCATCTCCTCAATTCTCGGCGCCATCAACTTCATCACAACAGCCATCAACATAAAACCCCCCGCTCTATCCCAATACCAAACCCCATTATTCGTCTGATCCGTGTTAATCACCGCTATCCTCCTCCTCCTATCCCTCCCAGTCCTAGCAGCAGGAATCACCATACTACTCACCGACCGCAACCTCAACACAACATTCTTTGACCCCGCTGGTGGGGGCGACCCCATCCTCTACCAACAC
>gi|197257137|gb|FJ028445.1|_Tinamotis_ingoufi_voucher_MACN-Or-ct_2335_cytochrome_oxidase_subunit_1_(COI)_gene_partial_cds_mitochondrial
CTATACNTCNTCTTCGGTGCATGGGCTGGCATAGTAGGCACCGCCCTCAGCCTCCTGATCCGCGCCGAACTCGGCCAACCCGGAACCCTTATCGGAGATGACCAAATCTATAACGTCATTGTAACCGCACATGCCTTTGTCATAATCTTCTTTATAGTTATACCAATCATAATCGGCGGATTCGGAAACTGATTAGTCCCACTAATACTCGGAGCCCCTGACATAGCTTTCCCTCGAATGAACAACATAAGCTTCTGACTCCTACCACCATCCTTCCTCCTCCTTATAGCCTCCTCCACAATTGAAAGCGGGGCCGGAACAGGATGAACAGTCTACCCCCCACTCGCTAGTAACCTCGCACATGCAGGCGCATCAGTTGACCTAGCCATCTTCTCCTTACATCTAGCAGGGGTCTCCTCCATCCTCGGTGCCATTAACTTTATCACAACTGCCATCAACATAAAACCCCCCGCCTTATCCCAGTATCAAACCCCACTATTTGTCTGATCTGTCCTAATCACCGCTATCCTCCTACTCCTATCCCTCCCCGTCCTAGCTGCAGGAATCACCATACTCCTCACTGACCGAAACCTCAACACAACATTCTTCGATCCCGCTGGTGGTGGTGACCCCATCCTCTACCAACAC
>gi|197257133|gb|FJ028443.1|_Tigrisoma_lineatum_voucher_MACN-Or-ct_1649_cytochrome_oxidase_subunit_1_(COI)_gene_partial_cds_mitochondrial
TTGTATCTAGTCTTCGGAGCATGAGCAGGCATAGTTGGAACAGCCCTAAGCCTGCTTATCCGAGCTGAACTTGGTCAACCCGGAACTCTTTTAGGAGATGACCAAATCTATAATGTAATCGTTACAGCCCATGCCTTCGTAATAATCTTTTTCATAGTGATACCAATCATAATCGGAGGTTTTGGAAACTGACTAGTCCCCCTCATAATCGGTGCTCCAGATATAGCATTCCCACGTATAAACAACATAAGCTTCTGACTACTACCTCCATCATTCACTCTCCTACTAGCCTCATCCACAGTTGAAGCAGGAGCTGGCACAGGATGAACAGTATACCCCCCACTAGCTGGAAACCTAGCCCATGCCGGAGCCTCAGTAGACCTAGCTATCTTTTCCCTACACCTAGCAGGCGTATCTTCCATCCTAGGTGCAATCAACTTTATTACAACAGCTATCAACATAAAACCTCCAGCCCTGTCCCAATACCAAACTCCCCTATTCGTATGATCCGTCTTAATCACTGCCGTTCTTCTTTTACTCTCACTCCCAGTCCTAGCCGCAGGCATTACAATGCTACTAACCGACCGAAACTTAAACACCACATTCTTTGACCCAGCTGGAGGTGGAGATCCAGTCCTCTACCAACAC
>gi|197257129|gb|FJ028441.1|_Thraupis_sayaca_voucher_MACN-Or-ct_1918_cytochrome_oxidase_subunit_1_(COI)_gene_partial_cds_mitochondrial
CNNTACCTAATCTTTGGCGCATGAGCCGGGATAGTAGGTACTGCCCTAAGCCTCCTCATTCGAGCAGAACTAGGCCAACCTGGAGCCCTTCTAGGAGACGACCAAATCTACAACGTGGTCGTTACAGCCCATGCCTTCGTAATAATCTTCTTCATAGTCATGCCAATTATAATCGGAGGGTTCGGAAACTGACTAGTCCCCCTAATAATTGGAGCCCCAGACATAGCATTCCCACGAATAAACAACATAAGCTTCTGACTACTTCCCCCATCCTTCCTTCTCCTCCTAGCATCCTCTACAGTTGAAGCAGGTGCTGGAACAGGATGAACTGTATACCCGCCACTAGCTGGCAACCTAGCCCACGCCGGAGCCTCCGTCGACCTTGCAATCTTCTCCCTACATCTAGCTGGCATCTCTTCAATTCTAGGGGCAATCAACTTCATTACCACAGCCATCAACATAAAACCACCCGCCCTATCACAATACCAAACTCCCCTGTTCGTCTGATCCGTCTTAATTACTGCAGTCCTGCTGCTCCTGTCCCTACCAGTTCTCGCCGCAGGAATTACAATACTTCTCACAGACCGCAACCTTAACACCACATTCTTTGACCCTGCTGGAGGAGGAGACCCCGTCCTGTACCAGCAC
>gi|197257125|gb|FJ028439.1|_Thraupis_sayaca_voucher_MACN-Or-ct_1394_cytochrome_oxidase_subunit_1_(COI)_gene_partial_cds_mitochondrial
CTGTACCTAATCTTTGGCGCATGAGCCGGGATAGTAGGTACTGCCCTAAGCCTCCTCATTCGAGCAGAACTAGGCCAACCTGGAGCCCTTCTAGGAGACGACCAAATCTACAACGTGGTCGTTACAGCCCATGCCTTCGTAATAATCTTCTTCATAGTCATGCCAATTATAATCGGAGGGTTCGGAAACTGACTAGTCCCCCTAATAATTGGAGCCCCAGACATAGCATTCCCACGAATAAACAACATAAGCTTCTGACTACTTCCCCCATCCTTCCTTCTCCTCCTAGCATCCTCTACAGTTGAAGCAGGTGCTGGAACAGGATGAACTGTATACCCGCCACTAGCTGGCAACCTAGCCCACGCCGGAGCCTCCGTCGACCTTGCAATCTTCTCCCTACATCTAGCTGGCATCTCTTCAATTCTAGGGGCAATCAACTTCATTACCACAGCCATCAACATAAAACCACCCGCCCTATCACAATACCAAACTCCCCTGTTCGTCTGATCCGTCTTAATTACTGCAGTCCTGCTGCTCCTGTCCCTACCAGTTCTCGCCGCAGGAATTACAATACTTCTCACAGACCGCAACCTTAACACCACATTCTTTGACCCTGCTGGAGGAGGAGACCCCGTCCTGTACCAGCAC
>gi|197257121|gb|FJ028437.1|_Thraupis_sayaca_voucher_MACN-Or-ct_1159_cytochrome_oxidase_subunit_1_(COI)_gene_partial_cds_mitochondrial
CTGTACTTAATCTTTGGCGCATGAGCCGGGATAGTAGGTACTGCCCTAAGCCTCCTCATTCGAGCAGAACTAGGCCAACCTGGAGCCCTTCTAGGAGACGACCAAATCTACAACGTGGTCGTTACAGCCCATGCCTTCGTAATAATCTTCTTCATAGTCATGCCAATTATAATCGGAGGGTTCGGAAACTGACTAGTCCCCCTAATAATTGGAGCCCCAGACATAGCATTCCCACGAATAAACAACATAAGCTTCTGACTACTTCCCCCATCCTTCCTTCTCCTCCTAGCATCCTCTACAGTTGAAGCAGGTGCTGGAACAGGATGAACTGTATACCCGCCACTAGCTGGCAACCTAGCCCACGCCGGAGCCTCCGTCGACCTTGCAATCTTCTCCCTACATCTAGCTGGCATCTCTTCAATTCTAGGGGCAATCAACTTCATTACCACAGCCATCAACATAAAACCACCCGCCCTATCACAATACCAAACTCCCCTGTTCGTCTGATCCGTCTTAATTACTGCAGTCCTGCTGCTCCTGTCCCTACCAGTTCTCGCCGCAGGAATTACAATACTTCTCACAGACCGCAACCTTAACACCACATTCTTTGACCCTGCTGGAGGAGGAGACCCCGTCCTGTACCAGCAC
>gi|197257117|gb|FJ028435.1|_Thraupis_bonariensis_voucher_MACN-Or-ct_2753_cytochrome_oxidase_subunit_1_(COI)_gene_partial_cds_mitochondrial
CTATATCTGATCTTCGGTGCATGAGCCGGAATAGTGGGCACCGCCCTAAGCCTTCTCATTCGAGCAGAGCTAGGACAACCCGGGGCTCTTCTAGGGGACGACCAAGTCTACAACGTAATCGTCACAGCCCATGCTTTTGTAATAATCTTCTTCATAGTTATACCAATTATAATCGGAGGGTTCGGAAACTGACTAGTTCCCCTAATAATTGGAGCCCCAGACATAGCATTCCCACGAATAAATAACATAAGCTTCTGACTACTTCCACCATCCTTCCTCCTTCTCCTAGCATCCTCCACAGTAGAAGCAGGCGTGGGTACGGGCTGAACTGTATACCCCCCACTAGCTGGCAATCTAGCTCACGCCGGAGCCTCAGTCGATCTTGCAATCTTCTCCCTACATCTAGCCGGTATCTCTTCAATTCTAGGGGCAATCAACTTCATTACAACAGCCATCAACATAAAACCTCCCGCCCTATCACAATACCAAACCCCCCTATTCGTCTGATCAGTCCTAATCACCGCAGTTTTACTACTCCTATCTCTTCCCGTTCTCGCTGCAGGAATCACAATACTCCTCACAGACCGTAACCTCAACACCACATTCTTCGACCCTGCCGGAGGAGGAGATCCTGTCCTGTACCAGCAC
>gi|197257113|gb|FJ028433.1|_Thraupis_bonariensis_voucher_MACN-Or-ct_2815_cytochrome_oxidase_subunit_1_(COI)_gene_partial_cds_mitochondrial
--ATATCTGATCTTCGGTGCATGAGCCGGAATAGTGGGCACCGCCCTAAGCCTTCTCATTCGAGCAGAGCTAGGACAACCCGGGGCTCTTCTAGGGGACGACCAAGTCTACAACGTAATCGTCACAGCCCATGCTTTTGTAATAATCTTCTTCATAGTTATACCAATTATAATCGGAGGGTTCGGAAACTGACTAGTTCCCCTAATAATTGGAGCCCCAGACATAGCATTCCCACGAATAAATAACATAAGCTTCTGACTACTTCCACCATCCTTCCTCCTTCTCCTAGCATCCTCCACAGTAGAAGCAGGCGTGGGTACGGGCTGAACTGTATACCCCCCACTAGCTGGCAATCTAGCTCACGCCGGAGCCTCAGTCGATCTTGCAATCTTCTCCCTACATCTAGCCGGTATCTCTTCAATTCTAGGGGCAATCAACTTCATTACAACAGCCATCAACATAAAACCTCCCGCCCTATCACAATACCAAACCCCCCTATTCGTCTGATCAGTCCTAATCACCGCAGTTTTACTACTCCTATCTCTTCCCGTTCTCGCTGCAGGAATCACAATACTCCTCACAGACCGTAACCTCAACACCACATTCTTCGACCCTGCCGGAGGAGGAGATCCTGTCCTGTACCAGCAC
>gi|197257109|gb|FJ028431.1|_Thraupis_bonariensis_voucher_MACN-Or-ct_871_cytochrome_oxidase_subunit_1_(COI)_gene_partial_cds_mitochondrial
CTATATCTGATCTTCGGTGCATGAGCCGGAATAGTGGGCACCGCCCTAAGCCTTCTCATTCGAGCAGAGCTAGGACAACCCGGGGCTCTTCTAGGGGACGACCAAGTCTACAACGTAATCGTCACAGCCCATGCTTTTGTAATAATCTTCTTCATAGTTATACCAATTATAATCGGAGGGTTCGGAAACTGACTAGTTCCCCTAATAATTGGAGCCCCAGACATAGCATTCCCACGAATAAATAACATAAGCTTCTGACTACTTCCACCATCCTTCCTCCTTCTCCTAGCATCCTCCACAGTAGAAGCAGGCGTGGGTACGGGCTGAACTGTATACCCCCCACTAGCTGGCAATCTAGCTCACGCCGGAGCCTCAGTCGATCTTGCAATCTTCTCCCTACATCTAGCCGGTATCTCTTCAATTCTAGGGGCAATCAACTTCATTACAACAGCCATCAACATAAAACCTCCCGCCCTATCACAATACCAAACCCCCCTATTCGTCTGATCAGTCCTAATCACCGCAGTTTTACTACTCCTATCTCTTCCCGTTCTCGCTGCAGGAATCACAATACTCCTCACAGACCGTAACCTCAACACCACATTCTTCGACCCTGCCGGAGGAGGAGATCCTGTCCTGTACCAGCAC
>gi|197257105|gb|FJ028429.1|_Thlypopsis_sordida_voucher_MACN-Or-ct_1811_cytochrome_oxidase_subunit_1_(COI)_gene_partial_cds_mitochondrial
CTGTACCTAATCTTCGGCGCATGAGCCGGAATAGTAGGTACTGCCCTAAGCCTCCTCATCCGAGCAGAGCTAGGTCAACCCGGAGCTCTTCTAGGAGACGACCAAGTCTACAACGTAATCGTCACAGCCCATGCTTTCGTAATAATCTTCTTCATAGTTATACCAATTATAATCGGAGGCTTCGGAAACTGACTAGTTCCCCTAATAATCGGAGCCCCAGACATAGCATTCCCACGGATAAACAACATAAGTTTCTGACTACTCCCTCCATCTTTCCTACTGCTCCTGGCATCTTCTACAGTTGAAGCGGGCGTTGGAACAGGCTGAACAGTTTACCCCCCACTAGCCGGCAACCTGGCCCACGCCGGAGCCTCAGTCGACCTTGCAATTTTCTCCCTGCACTTAGCCGGTATCTCTTCAATCCTAGGGGCAATCAACTTCATCACAACAGCTATCAACATGAAACCCCCTGCCCTCTCACAATACCAAACTCCCCTATTCGTCTGATCAGTACTAATCACTGCAGTATTACTACTCCTATCCCTTCCAGTCCTTGCTGCAGGAATTACAATACTCCTTACAGACCGTAACCTAAACACTACATTCTTCGACCCTGCAGGAGGAGGGGACCCTGTTCTATACCAACAT
>gi|197257101|gb|FJ028427.1|_Thlypopsis_sordida_voucher_MACN-Or-ct_1399_cytochrome_oxidase_subunit_1_(COI)_gene_partial_cds_mitochondrial
CTGTACCTNATCTTCGGCGCATGAGCCGGAATAGTAGGTACTGCCCTAAGCCTCCTCATCCGAGCAGAGCTAGGTCAACCCGGAGCTCTTCTAGGAGACGACCAAGTCTACAACGTAATCGTCACAGCCCATGCTTTCGTAATAATCTTCTTCATAGTTATACCAATTATAATCGGAGGCTTCGGAAACTGACTAGTTCCCCTAATAATCGGAGCCCCAGACATAGCATTCCCACGGATAAACAACATAAGCTTCTGACTACTCCCTCCATCTTTCCTACTGCTCCTGGCATCTTCTACAGTTGAAGCGGGCGTTGGAACAGGCTGAACAGTTTACCCCCCACTAGCCGGCAACCTGGCCCACGCCGGAGCCTCAGTCGACCTTGCAATTTTCTCCCTGCACTTAGCCGGTATCTCTTCGATCCTAGGGGCAATCAACTTCATCACAACAGCTATCAACATGAAACCCCCTGCCCTCTCACAATACCAAACTCCCCTATTCGTCTGATCAGTACTAATCACTGCAGTATTACTACTCCTATCCCTTCCAGTCCTTGCTGCAGGAATTACAATGCTCCTTACAGACCGTAACCTAAACACTACATTCTTCGACCCTGCAGGAGGAGGGGACCCTGTTCTATACCAACAT
>gi|197257097|gb|FJ028425.1|_Thlypopsis_ruficeps_voucher_MACN-Or-ct_734_cytochrome_oxidase_subunit_1_(COI)_gene_partial_cds_mitochondrial
CTGTACCTAATTTTCGGTGCATGAGCCGGAATAGTAGGTACTGCCCTAAGCCTCCTCATCCGAGCAGAGCTAGGCCAACCTGGAGCTCTTCTAGGAGACGATCAAGTCTACAACGTAATCGTCACAGCCCATGCTTTCGTAATAATTTTCTTCATAGTTATGCCAATTATAATCGGAGGCTTCGGAAACTGACTAGTCCCCCTAATAATTGGAGCCCCAGACATAGCATTCCCACGAATAAACAACATAAGCTTCTGACTACTTCCCCCATCTTTCCTGCTCCTCCTAGCATCTTCTACAGTTGAAGCAGGCGTTGGTACAGGCTGAACGGTTTACCCCCCACTAGCCGGTAACCTAGCCCACGCCGGAGCCTCAGTCGATCTTGCAATCTTCTCCCTACATCTAGCTGGCATCTCTTCGATCCTAGGGGCAATCAACTTCATTACAACAGCCGTCAACATAAAACCACCTGCCCTTTCACAATACCAAACCCCCCTATTCGTCTGATCAGTACTAATCACTGCAGTATTACTACTCCTATCCCTCCCAGTCCTTGCTGCAGGAATTACAATACTCCTCACAGACCGCAACCTTAACACCACATTCTTCGACCCTGCAGGAGGAGGAGACCCTGTCCTATACCAACAC
>gi|197257093|gb|FJ028423.1|_Thinocorus_orbignyianus_voucher_MACN-Or-ct_1321_cytochrome_oxidase_subunit_1_(COI)_gene_partial_cds_mitochondrial
CTATACTTAATCTTTGGCGCATGAGCCGGTATAGTCGGTACCGCCCTCAGCCTACTCATCCGCGCAGAACTCGGCCAACCAGGAACATTACTAGGAGATGATCAAATCTACAACGTAATCGTCACCGCCCATGCTTTCGTAATAATCTTCTTCATAGTAATACCTATCATGATCGGAGGCTTCGGAAACTGACTAGTCCCCCTTATAATTGGTGCCCCAGACATAGCATTTCCACGAATAAACAACATAAGCTTCTGACTACTTCCCCCATCATTCTTACTCCTCCTTGCCTCCTCCACAGTAGAAGCCGGAGCCGGTACGGGATGAACTGTATACCCGCCCCTAGCCGGCAACCTAGCACATGCTGGAGCCTCAGTAGACCTAGCCATCTTCTCGCTACACTTAGCAGGTGTGTCCTCTATCTTAGGTGCAATTAACTTCATCACAACCGCCATCAACATAAAACCACCAGTCCTTTCCCAATACCAAACCCCACTATTTGTATGATCAGTACTCATCACCGCTGTCCTACTACTACTCTCACTACCAGTCCTTGCTGCCGGCATCACCATACTCTTAACTGACCGAAACCTAAATACCACATTCTTCGACCCCGCTGGAGGAGGAGACCCAGTCCTATACCAACAC
>gi|197257089|gb|FJ028421.1|_Thinocorus_orbignyianus_voucher_MACN-Or-ct_1102_cytochrome_oxidase_subunit_1_(COI)_gene_partial_cds_mitochondrial
CTATACTTAATCTTTGGCGCATGAGCCGGTATAGTCGGTACCGCCCTCAGCCTACTCATCCGCGCAGAACTCGGCCAACCAGGAACATTACTAGGAGATGATCAAATCTACAACGTAATCGTCACCGCCCATGCTTTCGTAATAATCTTCTTCATAGTAATACCTATCATGATCGGAGGCTTCGGAAACTGACTAGTCCCCCTTATAATTGGTGCCCCAGACATAGCATTTCCACGAATAAACAACATAAGCTTCTGACTACTTCCCCCATCATTCTTACTCCTCCTTGCCTCCTCCACAGTAGAAGCCGGAGCCGGTACGGGATGAACTGTATACCCGCCCCTAGCCGGCAACCTAGCACATGCTGGAGCCTCAGTAGACCTAGCCATCTTCTCGCTACACTTAGCAGGTGTGTCCTCTATCTTAGGTGCAATTAACTTCATCACAACCGCCATCAACATAAAACCACCAGTCCTTTCCCAATACCAAACCCCACTATTTGTATGATCAGTACTCATCACCGCTGTCCTACTACTACTCTCACTACCAGTCCTTGCTGCCGGCATCACCATACTCTTAACTGACCGAAACCTAAATACCACATTCTTCGACCCCGCTGGAGGAGGAGACCCAGTCCTATACCAACAC
>gi|197257085|gb|FJ028419.1|_Thinocorus_orbignyianus_voucher_MACN-Or-ct_1180_cytochrome_oxidase_subunit_1_(COI)_gene_partial_cds_mitochondrial
CTATACTTAATCTTTGGCGCATGAGCCGGTATAGTCGGTACCGCCCTCAGCCTACTCATCCGCGCAGAACTCGGCCAACCAGGAACATTACTAGGAGATGATCAAATCTACAACGTAATCGTCACCGCCCATGCTTTCGTAATAATCTTCTTCATAGTAATACCTATCATGATCGGAGGCTTCGGAAACTGACTAGTCCCCCTTATAATTGGTGCCCCAGACATAGCATTTCCACGAATAAACAACATAAGCTTCTGACTACTTCCCCCATCATTCTTACTCCTCCTTGCCTCCTCCACAGTAGAAGCCGGAGCCGGTACGGGATGAACTGTATACCCGCCCCTAGCCGGCAACCTAGCACATGCTGGAGCCTCAGTAGACCTAGCCATCTTCTCGCTACACTTAGCAGGTGTGTCCTCTATCTTAGGTGCAATTAACTTCATCACAACCGCCATCAACATAAAACCACCAGTCCTTTCCCAATACCAAACCCCACTATTTGTATGATCAGTACTCATCACCGCTGTCCTACTACTACTCTCACTACCAGTCCTTGCTGCCGGCATCACCATACTCTTAACTGACCGAAACCTAAATACCACATTCTTCGACCCCGCTGGAGGAGGAGACCCAGTCCTATACCAACAC
>gi|197257081|gb|FJ028417.1|_Theristicus_melanopis_voucher_MACN-Or-ct_539_cytochrome_oxidase_subunit_1_(COI)_gene_partial_cds_mitochondrial
CTATACCTAATCTTCGGTGCATGAGCGGGTATAGTTGGAACCGCCCTTAGCTTACTCATTCGCGCAGAACTTGGTCAACCTGGGACACTTCTGGGAGACGACCAAATCTACAACGTGATCGTCACCGCCCATGCCTTCGTAATAATCTTCTTCATAGTTATACCAATCATGATCGGTGGATTTGGAAATTGACTAGTACCCCTCATAATCGGCGCACCCGACATAGCATTTCCACGCATGAACAACATAAGCTTTTGACTACTGCCTCCCTCCTTCTTACTCCTTCTAGCCTCCTCTACAGTAGAAGCAGGAGCGGGCACAGGATGAACCGTATACCCGCCCCTCGCTGGTAACCTTGCCCATGCCGGAGCTTCAGTAGACCTGGCCATCTTCTCCCTCCACCTAGCAGGGGTATCCTCCATCCTAGGAGCTATCAATTTCATCACAACTGCTATTAACATAAAACCCCCAACTCTCTCACAATACCAAACACCCCTGTTTGTTTGATCAGTCCTAATCACTGCTGTTCTACTACTACTCTCACTACCAGTCCTCGCTGCTGGCATTACTATACTACTAACGGACCGAAACCTAAACACCACATTCTTTGACCCTGCAGGAGGTGGAGACCCTGTCTTATACCAACAT
>gi|197257077|gb|FJ028415.1|_Thamnophilus_ruficapillus_voucher_MACN-Or-ct_2188_cytochrome_oxidase_subunit_1_(COI)_gene_partial_cds_mitochondrial
CTCTACCTAATCTTTGGAGCATGGGCCGGAATAATTGGAACCGCCCTAAGCCTCCTAATCCGAGCTGAACTTGGGCAACCAGGAACTCTACTAGGCGATGACCAAATCTACAACGTAATTGTCACCGCCCATGCATTCGTCATAATCTTCTTCATAGTTATACCCATCATAATTGGCGGATTCGGTAACTGATTAGTTCCCCTAATAATCGGAGCCCCCGACATAGCATTCCCACGAATAAACAATATAAGCTTCTGACTTCTTCCCCCTTCTTTCCTTCTCCTCTTAGCCTCCTCCACAGTAGAAGCAGGAGTTGGAACAGGATGAACAGTATACCCTCCACTAGCCGGTAACCTTGCCCATGCTGGAGCTTCAGTAGACCTAGCTATCTTTTCTCTTCACCTAGCAGGTGTTTCCTCCATTTTAGGGGCAATTAACTTCATCACAACCGCAATCAATATAAAACCCCCAGCACTATCACAATACCAAACTCCTCTGTTCGTCTGATCCGTCCTCATCACTGCCGTATTGCTGCTCCTATCCCTCCCAGTCCTTGCCGCCGGCATCACAATACTACTCACAGACCGTAACCTTAATACAACCTTCTTCGACCCAGCCGGAGGAGGAGACCCAATTCTCTACCAGCAC
>gi|197257073|gb|FJ028413.1|_Thamnophilus_ruficapillus_voucher_MACN-Or-ct_885_cytochrome_oxidase_subunit_1_(COI)_gene_partial_cds_mitochondrial
CTCTACCTAATCTTTGGAGCATGAGCCGGAATAATTGGAACCGCCCTAAGCCTTCTAATCCGAGCTGAACTTGGACAACCAGGAACCCTACTAGGCGATGACCAAATCTATAACGTAATTGTTACTGCCCATGCATTCGTCATAATCTTCTTCATAGTTATACCCATCATAATTGGAGGATTCGGTAACTGATTAGTTCCCCTAATAATCGGAGCCCCCGACATAGCATTCCCACGAATAAACAACATAAGCTTCTGACTTCTTCCCCCCTCCTTCCTTCTCCTCTTAGCCTCCTCCACAGTAGAAGCAGGAGCTGGAACAGGATGAACAGTTTACCCTCCACTAGCCGGTAACCTTGCCCATGCTGGAGCTTCAGTAGACCTGGCTATCTTTTCTCTTCACCTAGCAGGTGTTTCCTCCATTTTAGGGGCAATTAACTTCATCACAACCGCAATCAACATAAAACCCCCAGCACTATCACAATACCAAACTCCTCTATTCGTCTGATCCGTCCTCATCACTGCCGTATTACTGCTCCTATCCCTCCCAGTCCTTGCTGCCGGCATCACAATACTACTCACAGACCGTAACCTAAATACAACTTTCTTCGATCCAGCCGGAGGAGGAGACCCAATTCTCTACCAACAC
>gi|197257069|gb|FJ028411.1|_Thamnophilus_caerulescens_voucher_MACN-Or-ct_3251_cytochrome_oxidase_subunit_1_(COI)_gene_partial_cds_mitochondrial
-----------------------------------------------AAGCCTCCTAATCCGAGCTGAACTCGGACAACCAGGAACCCTACTAGGAGACGACCAAATTTATAATGTAATTGTTACCGCCCATGCATTCGTCATAATTTTCTTCATAGTCATGCCCATCATAATCGGTGGATTCGGTAACTGACTAGTCCCTTTAATAATCGGAGCCCCAGACATAGCATTCCCACGAATAAACAACATAAGCTTCTGACTCCTACCTCCCTCTTTCCTTCTCCTTTTAGCCTCCTCCACAGTGGAAGCAGGAGTCGGAACAGGATGAACAGTGTACCCCCCGCTAGCCGGTAACCTCGCCCATGCAGGAGCTTCAGTAGACCTAGCTATCTTTTCTCTTCACCTAGCAGGTGTCTCCTCTATCTTAGGCGCAATCAACTTCATCACAACTGCAATTAATATAAAACCCCCAGCATTATCACAGTACCAAACTCCTCTATTCGTTTGATCCGTCCTTATCACTGCTGTATTACTACTTCTATCTCTACCAGTCCTTGCCGCTGGTATCACAATACTACTCACAGACCGCAACCTAAACACAACCTTTTTCGACCCGGCCGGAGGAGGAGATCCAATCCTCTACCAACAC
>gi|197257065|gb|FJ028409.1|_Thamnophilus_caerulescens_voucher_MACN-Or-ct_1425_cytochrome_oxidase_subunit_1_(COI)_gene_partial_cds_mitochondrial
CTTTATTTAATCTTTGGTGCATGAGCTGGAATAATTGGAACAGCCCTAAGCCTCCTAATCCGAGCTGAACTCGGACAGCCAGGAACCCTACTAGGAGACGACCAAATTTATAATGTTATTGTTACCGCTCATGCATTCGTCATAATTTTCTTCATAGTCATACCCATCATAATCGGTGGATTCGGTAACTGACTAGTCCCTTTAATAATCGGAGCCCCAGACATAGCATTCCCACGAATAAACAATATAAGCTTCTGACTCCTACCTCCCTCTTTCCTTCTCCTTTTAGCCTCCTCCACAGTGGAAGCAGGAGTCGGAACAGGATGGACAGTATACCCCCCGCTAGCCGGTAACCTCGCCCATGCAGGGGCTTCAGTAGACCTAGCTATCTTTTCCCTTCACCTAGCAGGTGTCTCCTCTATTTTAGGTGCAATCAACTTCATCACAACTGCAATTAATATAAAACCCCCAGCATTATCACAATACCAAACTCCTCTATTCGTTTGATCCGTCCTTATCACTGCTGTATTACTACTTCTATCTCTACCAGTCCTTGCCGCTGGTATCACGATACTACTCACAGACCGTAACCTAAACACAACCTTTTTCGACCCAGCCGGAGGAGGAGATCCAATCCTCTACCAACAC
>gi|197257061|gb|FJ028407.1|_Thamnophilus_caerulescens_voucher_MACN-Or-ct_892_cytochrome_oxidase_subunit_1_(COI)_gene_partial_cds_mitochondrial
CTTTATTTAATCTTTGGTGCATGAGCTGGAATAATTGGAACAGCCCTAAGCCTCCTAATCCGAGCTGAACTCGGACAACCAGGAACCTTACTAGGAGACGACCAAATTTATAATGTAATTGTTACCGCTCATGCATTCGTCATAATTTTCTTCATAGTCATACCCATCATAATCGGTGGATTTGGTAACTGACTAGTCCCTTTAATAATCGGAGCCCCAGACATAGCATTCCCACGAATAAACAACATAAGCTTCTGACTCCTACCTCCCTCTTTCCTTCTCCTTTTAGCCTCCTCCACAGTGGAAGCAGGAGTCGGAACAGGATGGACAGTATACCCCCCGCTAGCCGGTAACCTCGCCCATGCAGGGGCTTCAGTAGACCTAGCTATCTTTTCCCTTCACCTAGCAGGTGTCTCCTCTATTTTAGGTGCAATCAACTTCATCACAACTGCAATTAATATAAAACCCCCAGCATTATCACAATACCAAACTCCTCTATTCGTTTGATCCGTCCTTATCACTGCTGTATTACTACTTCTATCTCTACCAGTCCTTGCCGCTGGTATCACAATACTACTCACAGACCGCAACCTAAACACAACCTTTTTCGACCCAGCCGGAGGAGGAGATCCAATCCTCTACCAACAC
>gi|197257057|gb|FJ028405.1|_Thamnophilus_caerulescens_voucher_MACN-Or-ct_1387_cytochrome_oxidase_subunit_1_(COI)_gene_partial_cds_mitochondrial
CTTTATTTAATCTTTGGTGCATGAGCTGGAATAATTGGAACAGCCCTAAGCCTCCTAATCCGAGCTGAACTCGGACAGCCAGGAACCCTACTAGGAGACGACCAAATTTATAATGTTATTGTTACCGCTCATGCATTCGTCATAATTTTCTTCATAGTCATACCCATCATAATCGGTGGATTCGGTAACTGACTAGTCCCTTTAATAATCGGAGCCCCAGACATAGCATTCCCACGAATAAACAATATAAGCTTCTGACTCCTACCTCCCTCTTTCCTTCTCCTTTTAGCCTCCTCCACAGTGGAAGCAGGAGTCGGAACAGGATGGACAGTATACCCCCCGCTAGCCGGTAACCTCGCCCATGCAGGGGCTTCAGTAGACCTAGCTATCTTTTCCCTTCACCTAGCAGGTGTCTCCTCTATTTTAGGTGCAATCAACTTCATCACAACTGCAATTAATATAAAACCCCCAGCATTATCACAATACCAAACTCCTCTATTCGTTTGATCCGTCCTTATCACTGCTGTATTACTACTTCTATCTCTACCAGTCCTTGCCGCTGGTATCACGATACTACTCACAGACCGTAACCTAAACACAACCTTTTTCGACCCAGCCGGAGGAGGAGATCCAATCCTCTACCAACAC
>gi|197257053|gb|FJ028403.1|_Thalurania_glaucopis_voucher_MACN-Or-ct_2907_cytochrome_oxidase_subunit_1_(COI)_gene_partial_cds_mitochondrial
CTCTATCTAATCTTCGGAGCATGAGCCGGAATAGCTGGAACCGCCCTAAGCTTGCTAATTCGAGCAGAGCTCGGTCAACCAGGCACCCTACTAGGAGACGACCAAATCTACAATGTAATCGTCACCGCCCATGCCTTCGTAATAATCTTCTTTATAGTCATACCAATCATGATTGGAGGATTTGGAAACTGACTAATCCCCCTAATAATTGGAGCACCTGACATAGCATTCCCCCGAATAAACAACATAAGCTTCTGACTCCTACCTCCATCATTCCTCCTACTTCTTGCTTCCTCCACTGTAGAAGCAGGTGCAGGCACGGGGTGAACCGTTTACCCGCCACTAGCCGGCAACCTAGCCCACGCAGGAGCATCAGTAGACCTAGCTATCTTCTCCCTCCACCTGTCTGGCATCTCATCAATCCTTGGAGCAATTAACTTTATTACCACCGCAGTCAACATGAAACCCCCCGCTCTATCACAATACCAGACCCCCCTATTCGTCTGATCCGTCCTCATTACCGCCGTCCTACTACTTCTCTCACTCCCAGTGCTTGCCGCCGGAATCACTATACTACTCACCGACCGAAATCTAAACACCACATTCTTCGACCCCGCCGGAGGAGGAGACCCCATCCTCTACCAACAC
>gi|197257049|gb|FJ028401.1|_Thalasseus_sandvicensis_voucher_MACN-Or-ct_168_cytochrome_oxidase_subunit_1_(COI)_gene_partial_cds_mitochondrial
CTATACNTAATTTTCGGCGCATGAGCTGGTATAGTAGGTACTGCCCTTAGCCTACTTATTCGTGCAGAACTAGGTCAACCAGGAACCCTTCTAGGAGACGACCAAATCTACAACGTAATCGTCACCGCCCATGCCTTTGTAATAATCTTCTTCATAGTAATACCTATCATAATTGGGGGCTTCGGAAACTGATTAGTCCCACTTATAATTGGTGCTCCCGACATGGCATTCCCACGTATGAACAACATAAGCTTCTGACTACTCCCCCCATCATTCTTACTTCTCCTAGCCTCCTCTACAGTAGAAGCTGGGGCAGGCACAGGATGAACCGTGTACCCTCCCCTAGCCGGTAATCTAGCCCATGCCGGAGCTTCAGTGGATTTAGCAATCTTCTCCCTCCATCTAGCAGGTGTATCCTCTATCCTTGGTGCTATCAACTTTATCACCACAGCTATCAACATAAAACCCCCCGCCCTTTCACAATACCAAACTCCTCTATTTGTATGATCCGTACTTATCACTGCCGTTCTACTATTACTCTCACTCCCAGTACTCGCCGCCGGTATCACTATGTTGTTAACAGACCGAAACCTAAACACAACGTTCTTTGATCCTGCTGGAGGTGGTGACCCTGTGCTATACCAACAT
>gi|197257045|gb|FJ028399.1|_Thalasseus_maximus_voucher_MACN-Or-ct_186_cytochrome_oxidase_subunit_1_(COI)_gene_partial_cds_mitochondrial
CTATACATAATTTTCGGTGCATGAGCCGGTATGGTAGGTACTGCCCTTAGCCTACTCATTCGTGCAGAACTAGGTCAACCAGGAACCCTTCTAGGAGACGACCAAATCTACAACGTAATCGTCACCGCCCATGCCTTTGTAATAATCTTCTTCATAGTAATACCCATCATAATTGGGGGCTTCGGAAACTGATTAGTCCCACTTATAATTGGTGCCCCCGACATGGCATTCCCACGCATGAACAACATAAGCTTCTGACTACTTCCCCCATCATTCTTACTTCTCCTAGCTTCCTCTACAGTAGAAGCTGGGGCAGGTACAGGATGAACCGTTTACCCTCCCCTAGCCGGTAATCTAGCCCATGCTGGAGCTTCAGTGGACTTAGCAATCTTCTCCCTCCATCTAGCAGGTGTATCCTCTATCCTAGGTGCTATCAACTTTATCACCACAGCTATCAACATAAAACCCCCCGCCCTTTCACAATACCAAACTCCTCTATTTGTATGATCCGTACTTATCACTGCCGTTCTACTACTACTCTCGCTCCCAGTACTCGCCGCCGGCATCACCATGTTGTTAACAGACCGGAACCTAAACACAACGTTCTTTGATCCTGCTGGAGGTGGTGACCCTGTACTATACCAACAT
>gi|197257041|gb|FJ028397.1|_Thalassarche_chlororhynchos_voucher_MACN-Or-ct_1347_cytochrome_oxidase_subunit_1_(COI)_gene_partial_cds_mitochondrial
CTATACTTAATTTTTGGTGCATGAGCCGGCATAGTCGGAACCGCACTCAGCTTACTTATCCGGGCAGAACTTGGTCAGCCAGGAACCCTCCTGGGAGACGACCAAATCTACAATGTAATCGTCACCGCTCATGCCTTCGTAATAATCTTCTTTATAGTAATACCAATCATGATCGGAGGATTTGGAAACTGACTAGTACCACTTATAATTGGTGCACCTGACATAGCATTTCCACGTATAAATAATATAAGCTTCTGATTACTACCCCCATCCTTCCTCCTCCTGCTAGCATCCTCCACAGTAGAAGCAGGAGCAGGTACAGGATGAACTGTGTACCCGCCTCTAGCTGGCAACCTCGCCCACGCAGGGGCTTCAGTAGACCTGGCTATCTTCTCCCTCCACCTAGCAGGTGTTTCATCAATCCTAGGAGCGATTAACTTCATCACAACTGCCATCAACATAAAACCCCCAGCCCTCTCACAATACCAAACCCCCCTATTCGTATGATCTGTCCTCATTACTGCCGTCTTACTATTACTTTCACTACCAGTCCTTGCCGCCGGTATTACCATACTACTAACAGATCGGAACCTAAATACTACATTCTTCGACCCAGCTGGAGGAGGAGACCCAGTCCTATATCAACAT
>gi|197257037|gb|FJ028395.1|_Taraba_major_voucher_MACN-Or-ct_3156_cytochrome_oxidase_subunit_1_(COI)_gene_partial_cds_mitochondrial
----------------------GAGCCGGAATAATTGGAACCGCCCTCAGCCTCCTAATCCGGGCCGAACTCGGACAACCAGGAACCCTTCTAGGAGACGACCAAATTTACAACGTAATTGTCACCGCCCACGCATTTGTCATAATTTTCTTCATAGTTATACCCATCATGATCGGAGGATTTGGAAATTGACTAGTCCCCCTAATAATTGGAGCTCCCGACATGGCATTCCCACGAATAAACAACATAAGCTTTTGACTCCTACCCCCCTCTTTCCTCCTCTTACTCGCCTCCTCCACAGTAGAAGCAGGAGTAGGAACAGGATGAACAGTTTACCCCCCACTAGCTGGCAACCTAGCCCACGCCGGAGCCTCAGTAGACCTGGCTATCTTCTCCCTCCATCTAGCAGGTGTCTCCTCCATCTTAGGAGCAATTAATTTTATCACAACTGCAATCAACATAAAACCCCCAGCACTATCACAATATCAAACCCCTTTATTCGTATGATCTGTTCTTATCACCGCTGTACTACTACTCCTCTCCCTCCCAGTTCTCGCTGCCGGCATCACAATGCTACTCACAGACCGCAACCTAAACACAACATTCTTCGACCCAGCCGGAGGGGGAGACCCAATCCTGTACCAACAT
>gi|197257033|gb|FJ028393.1|_Tapera_naevia_voucher_MACN-Or-ct_1380_cytochrome_oxidase_subunit_1_(COI)_gene_partial_cds_mitochondrial
CTATACCTAATCTTCGGTGCCTGAGCAGGTATAATCGGAACCGCCCTAAGCCTGCTTATCCGTGCAGAACTAGGACAGCCCGGAACCTTACTAGGTGACGATCAAATTTACAATGTAATTGTCACCGCACATGCCTTTGTAATAATCTTCTTTATAGTTATGCCAATTATAATCGGAGGCTTTGGAAACTGACTAGTACCCCTCATAATTGGCGCACCCGACATAGCATTCCCCCGCATAAACAATATAAGCTTTTGACTCCTACCACCATCCTTCCTACTTTTACTTGCCTCATCCACAGTAGAAGCAGGAGCAGGAACAGGATGAACAGTATACCCCCCCTTAGCCGGAAACCTTGCCCACGCTGGTGCATCCGTAGATCTGGCCATCTTCTCCCTACACTTAGCAGGAGTGTCATCAATTCTAGGAGCTATCAATTTCATCACAACCGCCATCAACATAAAACCTCCAGCCCTCTCACAATACCAAACCCCATTATTCGTATGATCTGTACTCATTACTGCCGTTCTCCTACTCCTATCACTTCCCGTACTTGCTGCTGGAATCACAATACTATTAACAGATCGAAACCTAAACACTACATTCTTCGACCCCGCTGGCGGAGGAGACCCAGTTCTATACCAACAC
>gi|197257029|gb|FJ028391.1|_Tapera_naevia_voucher_MACN-Or-ct_1878_cytochrome_oxidase_subunit_1_(COI)_gene_partial_cds_mitochondrial
CTATACCTAATCTTCGGTGCCTGAGCAGGTATAATCGGAACCGCCCTAAGCCTGCTTATCCGTGCAGAACTAGGACAGCCCGGAACCTTACTAGGTGACGATCAAATTTACAATGTAATTGTCACCGCACATGCCTTTGTAATAATCTTCTTTATAGTTATGCCAATTATAATCGGAGGCTTTGGAAACTGACTAGTACCCCTCATAATTGGCGCACCCGACATAGCATTCCCCCGCATAAACAATATAAGCTTTTGACTCCTACCACCATCCTTCCTACTTTTACTTGCCTCATCCACAGTAGAAGCAGGAGCAGGAACAGGATGAACAGTATACCCCCCCTTAGCCGGAAACCTTGCCCACGCTGGTGCATCCGTAGATCTGGCCATCTTCTCCCTACACTTAGCAGGAGTGTCATCAATTCTAGGAGCTATCAATTTCATCACAACCGCCATCAACATAAAACCTCCAGCCCTCTCACAATACCAAACCCCATTATTCGTATGATCTGTACTCATTACTGCCGTTCTCCTACTCCTATCACTTCCCGTACTTGCTGCTGGAATCACAATACTATTAACAGATCGAAACCTAAACACTACATTCTTCGACCCCGCTGGCGGAGGAGACCCAGTTCTATACCAACAC
>gi|197257025|gb|FJ028389.1|_Tachyphonus_rufus_voucher_MACN-Or-ct_3227_cytochrome_oxidase_subunit_1_(COI)_gene_partial_cds_mitochondrial
---------------GGCGCATGAGCCGGAATAGTAGGTACCGCCCTAAGCCTCCTCATCCGAGCAGAACTAGGCCAACCTGGAGCTCTCCTAGGAGACGACCAAGTCTACAACGTAGTCGTCACAGCCCATGCTTTCGTAATAATCTTCTTCATAGTTATACCAATTATGATCGGAGGGTTTGGGAACTGACTAGTCCCCCTAATAATTGGAGCCCCAGACATAGCATTCCCACGAATAAACAACATAAGCTTCTGACTCCTTCCCCCATCCTTCCTCCTCCTCCTAGCATCTTCCACAGTAGAAGCAGGAGTCGGTACAGGCTGAACAGTATACCCCCCACTAGCTGGTAACCTAGCCCACGCCGGAGCCTCAGTCGACTTAGCAATCTTCTCCCTACACCTAGCCGGCATCTCTTCAATCCTAGGAGCGATCAACTTCATCACTACAGCAATCAACATAAAACCTCCTGCTCTTTCGCAATACCAAACCCCCCTGTTTGTATGATCAGTCCTAATCACTGCAGTCTTACTACTCCTATCCCTTCCAGTACTTGCTGCAGGAATCACAATACTCCTCACAGACCGCAACCTCAACACCACATTCTTCGACCCCGCCGGAGGAGGAGATCCTGTACTATACCAACAC
>gi|197257021|gb|FJ028387.1|_Tachyphonus_rufus_voucher_MACN-Or-ct_1515_cytochrome_oxidase_subunit_1_(COI)_gene_partial_cds_mitochondrial
CTATATCTAATTTTCGGCGCATGAGCCGGAATAGTAGGTACCGCCCTAAGCCTCCTCATCCGAGCAGAACTAGGCCAACCTGGAGCTCTCCTAGGAGACGACCAAGTCTACAACGTAGTCGTCACAGCCCATGCTTTCGTAATAATCTTCTTCATAGTTATACCAATTATGATCGGAGGGTTTGGGAACTGACTAGTCCCCCTAATAATTGGAGCCCCAGACATAGCATTCCCACGAATAAACAACATAAGCTTCTGACTCCTTCCCCCATCCTTCCTCCTCCTCCTAGCATCTTCCACAGTAGAAGCAGGAGTCGGTACAGGCTGAACAGTATACCCCCCACTAGCTGGTAACCTAGCCCACGCCGGAGCCTCAGTCGACTTAGCAATCTTCTCCCTACACCTAGCCGGCATCTCTTCAATCCTAGGAGCGATCAACTTCATCACTACAGCAATCAACATAAAACCTCCTGCTCTTTCGCAATACCAAACCCCCCTGTTTGTATGATCAGTCCTAATCACTGCAGTCTTACTACTCCTATCCCTTCCAGTACTTGCTGCAGGAATCACAATACTCCTCACAGACCGCAACCTCAACACCACATTCTTCGACCCCGCCGGAGGAGGAGATCCTGTACTATACCAACAC
>gi|197257017|gb|FJ028385.1|_Tachyphonus_rufus_voucher_MACN-Or-ct_1703_cytochrome_oxidase_subunit_1_(COI)_gene_partial_cds_mitochondrial
CTATATCTAATTTTCGGCGCATGAGCCGGAATNGTAGGTACCGCCCTAAGCCTCCTCATCCGAGCAGAACTAGGCCAACCTGGAGCTCTCCTAGGAGACGACCAAGTCTACAACGTAGTCGTCACAGCCCATGCTTTCGTAATAATCTTCTTCATAGTTATACCAATTATGATCGGAGGGTTTGGGAACTGACTAGTCCCCCTAATAATTGGAGCCCCAGACATAGCATTCCCACGAATAAACAACATAAGCTTCTGACTCCTTCCCCCATCCTTCCTCCTCCTCCTAGCATCTTCCACAGTAGAAGCAGGAGTCGGTACAGGCTGAACAGTATACCCCCCACTAGCTGGTAACCTAGCCCACGCCGGAGCCTCAGTCGACTTAGCAATCTTCTCCCTACACCTAGCCGGCATCTCTTCAATCCTAGGAGCGATCAACTTCATCACTACAGCAATCAACATAAAACCTCCTGCTCTTTCGCAATACCAAACCCCCCTGTTTGTATGATCAGTCCTAATCACTGCAGTCTTACTACTCCTATCCCTTCCAGTACTTGCTGCAGGAATCACAATACTCCTCACAGACCGCAACCTCAACACCACATTCTTCGACCCCGCCGGAGGAGGAGATCCTGTACTATACCAACAC
>gi|197257013|gb|FJ028383.1|_Tachyphonus_coronatus_voucher_MACN-Or-ct_1952_cytochrome_oxidase_subunit_1_(COI)_gene_partial_cds_mitochondrial
CTGTACCTAATCTTCGGCGCATGAGCCGGAATAGTAGGTACCGCCCTAAGCCTCCTTATCCGAGCAGAACTAGGTCAACCTGGAGCCCTCCTAGGAGACGACCAAGTCTACAACGTGGTCGTTACAGCCCATGCTTTCGTAATAATCTTCTTCATAGTTATACCAATTATGATCGGAGGATTTGGAAACTGACTAGTCCCTCTAATAATCGGAGCCCCAGACATAGCATTCCCACGAATAAACAACATAAGCTTCTGACTCCTTCCTCCATCCTTCCTACTCCTCNTAGCATCTTCCACAGTAGAAGCAGGAGTTGGCACAGGCTGAACAGTATACCCCCCACTAGCTGGCAACCTAGCCCACGCCGGAGCCTCAGTCGACTTAGCAATCTTCTCCCTACACCTAGCCGGCATCTCTTCAATCTTAGGAGCAATCAACTTCATCACAACAGCAATCAACATAAAACCCCCTGCCCTCTCACAATATCAAACCCCCCTATTCGTATGATCAGTCCTAATCACTGCAGTCTTACTACTCCTATCTCTCCCAGTACTTGCTGCAGGAATCACAATACTCCTCACAGACCGTAACCTCAACACTACATTCTTCGACCCCGCCGGAGGAGGAGACCCTGTACTATACCAGCAT
>gi|197257009|gb|FJ028381.1|_Tachycineta_meyeni_voucher_MACN-Or-ct_287_cytochrome_oxidase_subunit_1_(COI)_gene_partial_cds_mitochondrial
CTGTACNTAATNTTNGGNGCANGAGCAGGCATAGTAGGAACCGCCCTCAGCCTCCTCATTCGAGCAGAACTGGGTCAACCAGGAGCTCTCCTTGGAGACGACCAAATCTACAACGTAGTTGTCACCGCCCACGCCTTTGTAATAATCTTCTTCATAGTCATACCAATCATGATCGGAGGGTTCGGAAACTGACTAGTCCCACTAATGATCGGCGCTCCGGACATAGCATTCCCTCGAATAAACAATATAAGCTTCTGGCTACTCCCCCCATCCTTCCTGCTTCTCCTAGCCTCATCCACAGTAGAAGCAGGCGCAGGAACTGGCTGAACCGTTTACCCGCCCCTGGCCGGAAACCTAGCCCACGCCGGTGCTTCCGTAGACCTAGCCATTTTCTCCCTCCATCTAGCAGGGATCTCCTCAATCCTAGGAGCAATCAACTTTATCACCACGGCAATCAACATAAAACCTCCCGCTCTATCACAATACCAAACCCCCTTATTTGTCTGATCCGTACTAATTACCGCGGTACTCCTCCTTCTCTCCCTACCAGTACTAGCCGCTGGCATCACCATACTGCTAACAGATCGTAACCTCAACACCACTTTCTTTGACCCTGCCGGAGGAGGAGACCCAGTACTGTACCAACAC
>gi|197257005|gb|FJ028379.1|_Tachycineta_meyeni_voucher_MACN-Or-ct_2683_cytochrome_oxidase_subunit_1_(COI)_gene_partial_cds_mitochondrial
CTATACCTAATCTTCGGCGCATGAGCAGGCATAGTAGGAACCGCCCTCAGCCTCCTCATTCGAGCAGAACTGGGTCAACCAGGAGCTCTCCTTGGAGACGACCAAATCTACAACGTAGTTGTCACCGCCCACGCCTTTGTAATAATCTTCTTCATAGTCATACCAATCATGATCGGAGGGTTCGGAAACTGACTAGTCCCACTAATGATCGGCGCTCCGGACATAGCATTCCCTCGAATAAACAATATAAGCTTCTGGCTACTCCCCCCATCCTTCCTGCTTCTCCTAGCCTCATCCACAGTAGAAGCAGGCGCAGGAACTGGCTGAACCGTTTACCCGCCCCTGGCCGGAAACCTAGCCCACGCCGGTGCTTCCGTAGACCTAGCCATTTTCTCCCTCCATCTAGCAGGGATCTCCTCAATCCTAGGAGCAATCAACTTTATCACCACGGCAATCAACATAAAACCTCCCGCTCTATCACAATACCAAACCCCCTTATTTGTCTGATCCGTACTAATTACCGCGGTACTCCTCCTTCTCTCCCTACCAGTACTAGCCGCTGGCATCACCATACTGCTAACAGATCGTAACCTCAACACCACTTTCTTTGACCCTGCCGGAGGAGGAGACCCAGTACTGTACCAACAC
>gi|197257001|gb|FJ028377.1|_Tachycineta_leucorrhoa_voucher_MACN-Or-ct_1512_cytochrome_oxidase_subunit_1_(COI)_gene_partial_cds_mitochondrial
CTGTACCTAATTTTCGGCGCATGAGCAGGCATAGTAGGGACTGCCCTCAGCCTTCTCATTCGAGCAGAACTAGGTCAACCAGGAGCTCTCCTTGGAGACGATCAAATCTACAACGTAGTTGTCACCGCCCACGCCTTTGTAATAATCTTCTTCATAGTCATGCCAATCATGATCGGAGGGTTCGGAAACTGATTAGTCCCACTAATGATCGGCGCCCCGGACATAGCATTCCCCCGAATAAACAACATAAGCTTCTGACTACTCCCCCCATCCTTCCTGCTTCTCCTAGCCTCATCCACAGTAGAAGCAGGCGCAGGAACTGGTTGAACCGTCTACCCACCCCTGGCCGGAAACCTAGCCCACGCTGGTGCTTCCGTAGACCTAGCCATTTTCTCCCTCCACCTAGCAGGGATCTCCTCAATCCTAGGAGCAATCAACTTTATCACCACGGCAATCAACATAAAACCTCCCGCTCTATCACAATACCAAACCCCCTTATTTGTCTGATCTGTACTAATTACCGCAGTGCTCCTCCTTCTCTCCCTACCAGTATTAGCCGCCGGCATCACCATGCTGCTAACAGACCGTAACCTCAACACCACTTTCTTTGACCCTGCCGGAGGAGGAGACCCAGTACTGTACCAACAC
>gi|197256997|gb|FJ028375.1|_Tachuris_rubrigastra_voucher_MACN-Or-ct_675_cytochrome_oxidase_subunit_1_(COI)_gene_partial_cds_mitochondrial
CTTTACCTGATCTTCGGTGCCTGAGCAGGTATAATTGGCACCGCCCTGAGCCTTCTAATCCGAGCAGAGCTAGGACAACCAGGAACCCTTCTAGGAGATGATCAAATCTACAACGTAATCGTCACTGCTCATGCATTCGTAATAATCTTTTTTATAGTAATACCCATTATAATCGGGGGATTCGGCAACTGACTAGTACCTCTAATAATTGGCGCACCCGATATGGCATTCCCACGAATAAACAACATAAGCTTCTGACTCCTTCCCCCATCCTTCCTCCTCCTCTTGGCCTCCTCAACAGTAGAAGCTGGAGTTGGGACAGGATGAACCGTCTACCCACCACTAGCTGGCAACCTAGCCCACGCCGGAGCCTCAGTAGACCTAGCTATCTTCTCACTTCACCTAGCAGGAGTTTCTTCAATCTTAGGGGCTATCAACTTCATCACCACAGCAATCAACATGAAACCACCCGCCCTATCACAGTACCAAACCCCCCTGTTCGTCTGATCTGTCCTAATTACTGCAGTCCTCCTCCTCCTATCTCTCCCAGTCCTTGCCGCAGGCATCACCATACTCCTCACAGACCGTAACCTAAACACCACATTCTTTGACCCAGCAGGAGGCGGAGACCCAATTTTATATCAACAC
>gi|197256993|gb|FJ028373.1|_Tachuris_rubrigastra_voucher_MACN-Or-ct_692_cytochrome_oxidase_subunit_1_(COI)_gene_partial_cds_mitochondrial
CTTTACCTGATCTTCGGTGCCTGAGCAGGTATAATTGGCACCGCCCTGAGCCTTCTAATCCGAGCAGAGCTAGGACAACCAGGAACCCTTCTAGGAGATGATCAAATCTACAACGTAATCGTCACTGCTCATGCATTCGTAATAATCTTTTTTATAGTAATACCCATTATAATCGGGGGATTCGGCAACTGACTAGTACCTCTAATAATTGGCGCACCCGATATGGCATTCCCACGAATAAACAACATAAGCTTCTGACTCCTTCCCCCATCCTTCCTCCTCCTCTTGGCCTCCTCAACAGTAGAAGCTGGAGTTGGGACAGGATGAACCGTCTACCCACCACTAGCTGGCAACCTAGCCCACGCCGGAGCCTCAGTAGACCTAGCTATCTTCTCACTTCACCTAGCAGGAGTTTCTTCAATCTTAGGGGCTATCAACTTCATCACCACAGCAATCAACATGAAACCACCCGCCCTATCACAGTACCAAACCCCCCTGTTCGTCTGATCTGTCCTAATTACTGCAGTCCTCCTCCTCCTATCTCTCCCAGTCCTTGCCGCAGGCATCACCATACTCCTCACAGACCGTAACCTAAACACCACATTCTTTGACCCAGCAGGAGGCGGAGACCCAATTTTATATCAACAC
>gi|197256989|gb|FJ028371.1|_Syrigma_sibilatrix_voucher_MACN-Or-ct_1589_cytochrome_oxidase_subunit_1_(COI)_gene_partial_cds_mitochondrial
CTATACCTAATCTTCGGCGCATGAGCCGGCATGATTGGGACTGCCCTAAGCCTACTTATCCGGGCCGAACTAGGCCAACCAGGGACACTCCTAGGAGATGACCAAATTTACAATGTAATCGTTACTGCCCATGCCTTCGTGATGATCTTCTTTATAGTAATACCGATCATAATTGGGGGGTTCGGAAACTGACTAGTCCCCCTCATAATTGGTGCTCCAGACATAGCATTCCCACGTATAAACAACATAAGTTTTTGACTCCTCCCCCCATCATTCATACTTCTGCTAGCCTCATCCACAGTTGAAGCAGGAGCGGGCACAGGCTGAACAGTATACCCGCCCCTAGCCGGCAACCTAGCCCATGCCGGAGCATCCGTTGACCTAGCCATCTTCTCCCTCCACCTGGCAGGTGTATCCTCCATCCTAGGGGCAATTAATTTCATCACAACTGCCATCAACATAAAACCCCCAGCTCTATCACAGTACCAAACTCCCCTATTCGTATGATCCGTTCTAATTACCGCCGTCCTACTCCTACTCTCACTTCCAGTCCTCGCTGCAGGTATTACAATACTACTAACTGACCGAAACCTAAACACCACATTCTTTGACCCTGCAGGAGGCGGAGACCCAGTCCTCTACCAACAC
>gi|197256985|gb|FJ028369.1|_Syrigma_sibilatrix_voucher_MACN-Or-ct_304_cytochrome_oxidase_subunit_1_(COI)_gene_partial_cds_mitochondrial
CTATACCTAATCTTCGGCGCATGAGCCGGCATGATTGGGACTGCCCTAAGCCTACTTATCCGGGCCGAACTAGGCCAACCAGGGACACTCCTAGGAGATGACCAAATTTACAATGTAATCGTTACTGCCCATGCCTTCGTGATGATCTTCTTTATAGTAATACCGATCATAATTGGGGGGTTCGGAAACTGACTAGTCCCCCTCATAATTGGTGCTCCAGACATAGCATTCCCACGTATAAACAACATAAGTTTTTGACTCCTCCCCCCATCATTCATACTTCTGCTAGCCTCATCCACAGTTGAAGCAGGAGCGGGCACAGGCTGAACAGTATACCCGCCCCTAGCCGGCAACCTAGCCCATGCCGGAGCATCCGTTGACCTAGCCATCTTCTCCCTCCACCTGGCAGGTGTATCCTCCATCCTAGGGGCAATTAATTTCATCACAACTGCCATCAACATAAAACCCCCAGCTCTATCACAGTACCAAACTCCCCTATTCGTATGATCCGTTCTAATTACCGCCGTCCTACTCCTACTCTCACTTCCAGTCCTCGCTGCAGGTATTACAATACTACTAACTGACCGAAACCTAAACACCACATTCTTTGACCCTGCAGGAGGCGGAGACCCAGTCCTCTACCAACAC
>gi|197256981|gb|FJ028367.1|_Syndactyla_rufosuperciliata_voucher_MACN-Or-ct_894_cytochrome_oxidase_subunit_1_(COI)_gene_partial_cds_mitochondrial
CTTTATCTAATTTTTGGAGCATGAGCTGGTATAATTGGAACCTCTCTCAGCCTCCTAATTCGAGCCGAACTTGGTCAACCAGGCACTCTCTTAGGCGATGACCAAATTTATAATGTAATCGTTACTGCTCACGCCTTCGTGATAATCTTCTTTATAGTTATGCCCATTATAATTGGTGGATTCGGCAACTGATTAGTTCCCCTAATAATTGGCGCCCCCGACATAGCATTTCCTCGAATAAATAACATAAGCTTCTGACTTCTACCTCCATCCTTCCTACTGCTGCTAGCCTCTTCAACAGTAGAGGCCGGAGCAGGGACAGGATGAACAGTTTATCCCCCACTAGCAGGTAACCTAGCCCATGCTGGAGCCTCAGTAGACTTAGCTATCTTCTCCCTTCACCTAGCAGGTGTATCCTCTATTTTAGGGGCTATCAACTTTATCACAACTGCAATTAACATAAAACCACCCGCCCTCTCACAATATCAAACCCCACTATTCGTTTGATCCGTTCTCATCACTGCCGTATTACTTTTACTCTCCCTTCCTGTTTTAGCCGCCGGCATCACAATACTACTCACAGATCGTAACCTCAACACCACATTCTTTGACCCAGCTGGAGGTGGAGATCCCGTCTTATATCAACAC
>gi|197256977|gb|FJ028365.1|_Syndactyla_rufosuperciliata_voucher_MACN-Or-ct_724_cytochrome_oxidase_subunit_1_(COI)_gene_partial_cds_mitochondrial
CTTTATCTAATTTTTGGAGCATGAGCTGGTATAATTGGAACCTCTCTCAGCCTCCTAATTCGAGCCGAACTTGGTCAACCAGGCACTCTCTTAGGCGATGACCAAATTTATAATGTAATCGTTACTGCTCACGCCTTCGTGATAATCTTCTTTATAGTTATGCCCATTATAATTGGTGGATTCGGCAACTGATTAGTTCCCCTAATAATTGGCGCCCCCGACATAGCATTTCCCCGAATAAATAACATAAGCTTCTGACTTCTACCTCCATCCTTCCTACTGCTGCTAGCCTCTTCAACAGTAGAGGCCGGAGCAGGGACAGGATGAACAGTTTATCCCCCACTAGCAGGTAACCTAGCCCATGCTGGAGCCTCAGTAGACTTAGCTATCTTCTCCCTTCACCTAGCAGGTGTATCCTCTATTTTAGGGGCTATCAACTTTATCACAACTGCAATTAACATAAAACCACCCGCCCTCTCACAATATCAAACCCCACTATTCGTTTGATCCGTTCTCATCACTGCCGTATTACTTTTACTCTCCCTTCCTGTTTTAGCCGCCGGCATCACAATACTACTCACAGATCGTAACCTCAACACCACATTCTTTGACCCAGCTGGAGGTGGAGATCCCGTCTTATATCAACAC
>gi|197256973|gb|FJ028363.1|_Synallaxis_spixi_voucher_MACN-Or-ct_2280_cytochrome_oxidase_subunit_1_(COI)_gene_partial_cds_mitochondrial
CTCTACCTAATTTTTGGAGCATGAGCTGGTATAATTGGAACTGCCCTTAGCCTCCTAATCCGAGCTGAACTTGGTCAACCAGGTACTCTTCTAGGTGATGACCAAATTTACAATGTAATTGTCACCGCCCACGCCTTCGTAATAATTTTCTTTATAGTTATACCCATTATAATCGGCGGTTTCGGCAACTGACTAGTCCCACTAATAATTGGTGCCCCAGACATAGCCTTCCCCCGAATAAACAACATAAGCTTCTGACTTCTACCTCCATCATTCCTACTTCTCCTAGCCTCCTCAACAGTAGAAGCAGGAGTAGGAACAGGATGAACAGTCTATCCACCACTAGCAGGTAACCTAGCTCACGCAGGTGCCTCAGTTGATCTAGCCATCTTCTCCCTCCACTTAGCTGGCGTATCCTCTATCCTAGGTGCCATCAACTTCATCACAACCGCCATCAACATAAAACCACCCACTCTCTCACAATACCAAACACCACTATTCGTCTGATCTGTTCTCATCACTGCCGTACTCCTTCTACTATCACTCCCCGTCCTAGCCGCTGGCATCACAATGTTACTAACCGACCGAAACTTAAACACCACATTCTTCGACCCAGCCGGAGGCGGAGACCCCGTCCTATACCAACAC
>gi|197256969|gb|FJ028361.1|_Synallaxis_frontalis_voucher_MACN-Or-ct_1629_cytochrome_oxidase_subunit_1_(COI)_gene_partial_cds_mitochondrial
CTTTACCTAATCTTTGGAGCATGAGCTGGCATAATTGGAACCGCCCTTAGCCTCCTGATCCGAGCTGAACTTGGCCAACCAGGTACTCTACTAGGCGATGACCAAATTTATAATGTAATTGTCACCGCTCACGCCTTCGTAATAATTTTCTTTATAGTTATACCCATTATAATCGGTGGTTTCGGCAACTGACTAGTCCCACTAATAATTGGTGCCCCAGACATAGCCTTCCCCCGAATAAACAACATAAGCTTCTGACTTCTACCCCCATCATTCCTACTTCTCCTAGCCTCCTCAACAGTAGAAGCAGGCGTAGGAACAGGATGAACAGTCTATCCCCCACTAGCAGGTAACCTAGCTCACGCAGGTGCCTCAGTTGATCTAGCCATTTTCTCCCTCCATCTAGCTGGAGTATCCTCCATCCTAGGCGCAATCAACTTTATCACAACCGCCATCAACATAAAACCACCCACTCTTTCACAATACCAGACACCACTATTCGTTTGATCTGTCCTCATCACTGCTGTACTCCTCCTATTATCACTCCCTGTCCTAGCCGCCGGCATCACAATATTACTAACCGATCGAAACCTAAACACCACATTCTTCGACCCAGCCGGAGGTGGAGACCCCGTCCTATACCAGCAC
>gi|197256965|gb|FJ028359.1|_Synallaxis_frontalis_voucher_MACN-Or-ct_3187_cytochrome_oxidase_subunit_1_(COI)_gene_partial_cds_mitochondrial
----------------------GAGCTGGCATAATTGGAACCGCCCTTAGCCTCCTGATCCGAGCTGAACTTGGCCAACCAGGTACTCTACTAGGCGATGACCAAATTTATAATGTAATTGTCACCGCTCACGCCTTCGTAATAATTTTCTTTATAGTTATACCCATTATAATCGGTGGTTTCGGCAACTGACTAGTCCCACTAATAATTGGTGCCCCAGACATAGCCTTCCCCCGAATAAACAACATAAGCTTCTGACTTCTACCCCCATCATTCCTACTTCTCCTAGCCTCCTCAACAGTAGAAGCAGGCGTAGGAACAGGATGAACAGTCTATCCCCCACTAGCAGGTAACCTAGCTCACGCAGGTGCCTCAGTTGATCTAGCCATTTTCTCCCTCCATCTAGCTGGAGTATCCTCCATCCTAGGCGCAATCAACTTTATCACAACCGCCATCAACATAAAACCACCCACTCTTTCACAATACCAGACACCACTATTCGTTTGATCTGTCCTCATCACTGCTGTACTCCTCCTATTATCACTCCCTGTCCTAGCCGCCGGCATCACAATATTACTAACCGATCGAAACCTAAACACCACATTCTTCGACCCAGCCGGAGGTGGAGACCCCGTCCTATACCAGCAC
>gi|197256961|gb|FJ028357.1|_Synallaxis_azarae_voucher_MACN-Or-ct_996_cytochrome_oxidase_subunit_1_(COI)_gene_partial_cds_mitochondrial
CTTTACCTAATCTTTGGAGCATGAGCTGGCATAATTGGAACAGCCCTTAGCCTCTTGATCCGAGCTGAACTTGGCCAACCAGGTACTCTACTAGGCGATGACCAAATTTATAATGTAATTGTCACCGCTCACGCCTTCGTAATAATTTTCTTTATAGTTATACCCATTATAATCGGTGGTTTCGGCAACTGACTAGTTCCACTAATAATTGGTGCCCCAGACATAGCCTTCCCCCGAATAAACAACATAAGCTTCTGACTTCTACCTCCATCATTCCTACTTCTCCTAGCCTCCTCAACAGTAGAAGCAGGGGTAGGAACAGGATGAACAGTCTATCCACCTCTAGCAGGCAACCTAGCTCACGCAGGTGCCTCAGTTGATCTAGCCATCTTCTCCCTCCATCTAGCCGGAGTATCATCCATCCTAGGTGCTATCAACTTTATCACAACCGCCATTAACATAAAACCACCCACTCTCTCACAATACCAGACACCACTATTCGTCTGATCTGTCCTCATCACTGCTGTACTCCTTCTATTATCACTCCCTGTCCTAGCCGCCGGCATCACAATATTACTAACCGATCGAAACCTAAACACCACATTCTTCGACCCAGCCGGAGGTGGAGACCCCGTCCTATACCAACAC
>gi|197256957|gb|FJ028355.1|_Synallaxis_azarae_voucher_MACN-Or-ct_760_cytochrome_oxidase_subunit_1_(COI)_gene_partial_cds_mitochondrial
CTTTACCTAATCTTTGGAGCATGAGCTGGCATAATTGGAACAGCCCTTAGCCTCTTGATCCGAGCTGAACTTGGCCAACCAGGTACTCTACTAGGCGATGACCAAATTTATAATGTAATTGTCACCGCTCACGCCTTCGTAATAATTTTCTTTATAGTTATACCCATTATAATCGGTGGTTTCGGCAACTGACTAGTTCCACTAATAATTGGTGCCCCAGACATAGCCTTCCCCCGAATAAACAACATAAGCTTCTGACTTCTACCTCCATCATTCCTACTTCTCCTAGCCTCCTCAACAGTAGAAGCAGGGGTAGGAACAGGATGAACAGTCTATCCACCTCTAGCAGGCAACCTAGCTCACGCAGGTGCCTCAGTTGATCTAGCCATCTTCTCCCTCCATCTAGCCGGAGTATCATCCATCCTAGGTGCTATCAACTTTATCACAACCGCCATTAACATAAAACCACCCACTCTCTCACAATACCAGACACCACTATTCGTCTGATCTGTCCTCATCACTGCTGTACTCCTTCTATTATCACTCCCTGTCCTAGCCGCCGGCATCACAATATTACTAACCGATCGAAACCTAAACACCACATTCTTCGACCCAGCCGGAGGTGGAGACCCCGTCCTATACCAACAC
>gi|197256953|gb|FJ028353.1|_Synallaxis_albescens_voucher_MACN-Or-ct_1492_cytochrome_oxidase_subunit_1_(COI)_gene_partial_cds_mitochondrial
CTTTACCTAATCTTTGGAGCATGAGCTGGCATAATTGGAACCGCCCTTAGCCTCTTGATCCGAGCTGAACTTGGCCAACCAGGTACTCTACTAGGCGATGACCAAATTTATAATGTAATCGTCACCGCTCACGCCTTCGTAATAATTTTCTTTATAGTTATGCCCATTATAATCGGTGGTTTCGGCAACTGACTAGTCCCACTAATAATTGGTGCCCCAGACATAGCCTTCCCCCGAATAAACAACATAAGCTTCTGACTTCTACCCCCATCATTCCTACTTCTCCTAGCCTCCTCAACAGTAGAAGCAGGGGTAGGAACAGGATGAACAGTCTATCCACCACTAGCAGGTAACTTAGCTCACGCAGGTGCCTCAGTTGATCTAGCCATCTTTTCTCTCCATCTAGCTGGAGTATCCTCCATCCTAGGCGCCATCAACTTTATCACAACCGCCATCAACATAAAACCACCCACTCTCTCACAATACCAGACACCACTATTCGTCTGATCCGTCCTCATCACTGCTGTACTCCTTCTATTATCACTCCCTGTCCTAGCTGCCGGCATCACAATATTACTAACCGATCGAAACCTAAACACCACATTCTTCGACCCAGCCGGAGGCGGAGACCCCGTCCTATACCAACAC
>gi|197256949|gb|FJ028351.1|_Synallaxis_albescens_voucher_MACN-Or-ct_3208_cytochrome_oxidase_subunit_1_(COI)_gene_partial_cds_mitochondrial
CTTTANNTAATCTTTGGAGCATGAGCTGGCATAATTGGAACCGCCCTTAGCCTCTTGATCCGAGCTGAACTTGGCCAACCAGGTACTCTACTAGGCGATGACCAAATTTATAATGTAATCGTCACCGCTCACGCCTTCGTAATAATTTTCTTTATAGTTATGCCCATTATAATCGGTGGTTTCGGCAACTGACTAGTCCCACTAATAATTGGTGCCCCAGACATAGCCTTCCCCCGAATAAACAACATAAGCTTCTGACTTCTACCCCCATCATTCCTACTTCTCCTAGCCTCCTCAACAGTAGAAGCAGGGGTAGGAACAGGATGAACAGTCTATCCACCACTAGCAGGTAACTTAGCTCACGCAGGTGCCTCAGTTGATCTAGCCATCTTTTCTCTCCATCTAGCTGGAGTATCCTCCATCCTAGGCGCCATCAACTTTATCACAACCGCCATCAACATAAAACCACCCACTCTCTCACAATACCAGACACCACTATTCGTCTGATCCGTCCTCATCACTGCTGTACTCCTTCTATTATCACTCCCTGTCCTAGCTGCCGGCATCACAATATTACTAACCGATCGAAACCTAAACACCACATTCTTCGACCCAGCCGGAGGCGGAGACCCCGTCCTATACCAACAC
>gi|197256945|gb|FJ028349.1|_Synallaxis_albescens_voucher_MACN-Or-ct_2810_cytochrome_oxidase_subunit_1_(COI)_gene_partial_cds_mitochondrial
CTTTACCTAATCTTTGGAGCATGAGCTGGCATAATTGGAACCGCCCTTAGCCTCTTGATCCGAGCTGAACTTGGCCAACCAGGTACTCTACTAGGCGATGACCAAATTTATAATGTAATCGTCACCGCTCACGCCTTCGTAATAATTTTCTTTATAGTTATGCCCATTATAATCGGTGGTTTCGGCAACTGACTAGTCCCACTAATAATTGGTGCCCCAGACATAGCCTTCCCCCGAATAAACAACATAAGCTTCTGACTTCTACCCCCATCATTCCTACTTCTCCTAGCCTCCTCAACAGTAGAAGCAGGGGTAGGAACAGGATGAACAGTCTATCCACCACTAGCAGGTAACTTAGCTCACGCAGGTGCCTCAGTTGATCTAGCCATCTTTTCTCTCCATCTAGCTGGAGTATCCTCCATCCTAGGCGCCATCAACTTTATCACAACCGCCATCAACATAAAACCACCCACTCTCTCACAATACCAGACACCACTATTCGTCTGATCCGTCCTCATCACTGCTGTACTCCTTCTATTATCACTCCCTGTCCTAGCTGCCGGCATCACAATATTACTAACCGATCGAAACCTAAACACCACATTCTTCGACCCAGCCGGAGGCGGAGACCCCGTCCTATACCAACAC
>gi|197256941|gb|FJ028347.1|_Sylviorthorhynchus_desmursii_voucher_MACN-Or-ct_2632_cytochrome_oxidase_subunit_1_(COI)_gene_partial_cds_mitochondrial
CTCTACCTAATTTTCGGAGCATGAGCCGGAATAATTGGAACAGCCCTTAGTCTCCTAATCCGAGCAGAACTTGGACAACCAGGTACCCTCCTAGGCGACGACCAAATTTATAACGTAATCGTTACCGCCCATGCTTTCGTAATAATCTTCTTTATAGTTATACCCATTATAATTGGTGGCTTCGGCAACTGGCTAGTCCCATTAATAATTGGTGCACCAGACATAGCCTTCCCCCGAATAAATAATATAAGCTTCTGACTTCTTCCCCCATCCTTTCTACTCCTGCTAGCCTCCTCAACAGTAGAAGCCGGAGTGGGAACAGGATGAACAGTCTACCCCCCACTAGCAGGTAACCTAGCCCACGCTGGAGCCTCAGTTGATTTGGCCATCTTCTCCCTTCACCTAGCCGGTGTATCCTCCATCCTAGGAGCTATTAACTTTATCACAACAGCCATCAACATAAAACCACCAGCTCTCTCACAATATCAAACCCCCCTATTCGTCTGATCTGTTCTCATCACTGCCGTACTTCTCCTCCTCTCCCTCCCTGTTTTAGCCGCTGGCATCACAATGCTACTCACAGACCGCAACCTTAACACCACATTCTTTGATCCAGCCGGAGGAGGAGACCCCGTCCTATACCAACAC
>gi|197256937|gb|FJ028345.1|_Suiriri_suiriri_voucher_MACN-Or-ct_1668_cytochrome_oxidase_subunit_1_(COI)_gene_partial_cds_mitochondrial
CTATACCTAATTTTTGGCGCCTGAGCCGGTATAATTGGCACCGCCCTTAGCCTTCTCATTCGAGCAGAACTTGGGCAACCAGGAACCCTCCTAGGAGACGATCAAATTTATAATGTAATCGTTACTGCTCACGCTTTCGTAATAATCTTTTTTATAGTAATACCCATTATGATCGGAGGATTTGGAAACTGGCTCGTTCCCCTAATAATTGGCGCCCCCGATATAGCATTCCCACGAATAAACAACATAAGCTTCTGACTACTCCCCCCATCATTTCTCCTCCTCCTAGCCTCATCTACAGTAGAAGCTGGAGTAGGAACTGGATGAACCGTCTACCCACCACTAGCCGGCAATCTAGCCCATGCCGGTGCTTCAGTAGACCTAGCAATCTTCTCCCTTCACCTTGCAGGTGTATCCTCAATCTTGGGTGCTATCAACTTTATTACAACTGCAATCAACATAAAACCACCAGCTCTTTCACAATACCAAACACCCCTATTTGTCTGATCAGTCCTAATCACTGCAGTTCTCCTTCTTCTTTCCCTTCCAGTCCTCGCAGCTGGTATCACCATGCTCTTAACTGACCGTAATCTCAACACCACATTCTTTGACCCTGCAGGCGGTGGAGATCCAGTCTTATATCAACAT
>gi|197256933|gb|FJ028343.1|_Suiriri_suiriri_voucher_MACN-Or-ct_2141_cytochrome_oxidase_subunit_1_(COI)_gene_partial_cds_mitochondrial
CTATACNTAATTTTTGGCGCNTGAGCCGGTATAATTGGCACCGCCCTTAGCCTTCTCATTCGAGCAGAACTTGGGCAACCAGGAACCCTCCTAGGAGACGATCAAATTTATAATGTAATCGTTACTGCTCACGCTTTCGTAATAATCTTTTTTATAGTAATACCCATTATGATCGGAGGATTTGGAAACTGGCTCGTTCCCCTAATAATTGGCGCCCCCGATATAGCATTCCCACGAATAAACAACATAAGCTTCTGACTACTCCCCCCATCATTTCTCCTCCTCCTAGCCTCATCTACAGTAGAAGCTGGAGTAGGAACTGGATGAACCGTCTACCCACCACTAGCCGGCAATCTAGCCCATGCCGGTGCTTCAGTAGACCTAGCAATCTTCTCCCTTCACCTTGCAGGTGTATCCTCAATCTTGGGTGCTATCAACTTTATTACAACTGCAATCAACATAAAACCACCAGCTCTTTCACAATACCAAACACCCCTATTTGTCTGATCAGTCCTAATCACTGCAGTTCTCCTTCTTCTTTCCCTTCCAGTCCTCGCAGCTGGTATCACCATGCTCTTAACTGACCGTAATCTCAACACCACATTCTTTGACCCTGCAGGCGGTGGAGATCCAGTCTTATATCAACAT
>gi|197256929|gb|FJ028341.1|_Sublegatus_modestus_voucher_MACN-Or-ct_005_cytochrome_oxidase_subunit_1_(COI)_gene_partial_cds_mitochondrial
CTATATCTAATTTTCGGCGCCTGGGCCGGTATAATTGGTACCGCCCTAAGCCTCCTAATTCGAGCAGAACTAGGACAACCAGGGACCCTCTTAGGAGATGACCAAATCTACAACGTGATCGTTACTGCTCATGCCTTCGTAATAATCTTCTTTATAGTAATGCCCATCATAATTGGAGGATTCGGTAACTGATTAGTTCCTCTAATGATTGGCGCCCCTGACATAGCATTCCCTCGTATAAACAATATAAGTTTCTGACTATTACCCCCATCATTCCTCCTCCTTTTAACCTCATCTACAGTCGAAGCTGGAGCAGGAACCGGATGAACTGTCTACCCTCCGTTAGCTGGTAACTTAGCACATGCTGGAGCTTCAGTAGACCTAGCTATTTTTTCTCTTNNCCTTGCAGGTGTTTCCTCAATCCTAGGTGCTATCAACTTCATTACTACTGCAATTAACATAAAACCACCAGCCCTGTCACAATATCAAACCCCACTATTCGTATGATCTGTCCTAATTACCGCAGTCCTTCTTCTCCTTTCTCTTCCAGTTCTTGCTGCCGGAATTACCATGCTGCTAACAGATCGTAACCTTAACACCACATTCTTTGATCCTGCAGGAGGAGGAGACCCAGTTCTATATCAACAT
>gi|197256925|gb|FJ028339.1|_Sturnella_superciliaris_voucher_MACN-Or-ct_1500_cytochrome_oxidase_subunit_1_(COI)_gene_partial_cds_mitochondrial
CTATACTTAATTTTCGGTGCTTGAGCCGGAATAGTGGGTACCGCCCTAAGCCTTCTCATCCGAGCAGAACTTGGCCAACCCGGAGCTCTTCTAGGAGACGACCAAGTCTACAACGTAGTCGTCACGGCCCATGCTTTCGTAATAATCTTCTTCATAGTCATACCAATTATAATTGGAGGGTTCGGGAACTGACTCGTTCCCCTAATAATTGGAGCCCCAGACATAGCATTCCCACGGATAAACAATATAAGCTTTTGATTACTCCCCCCATCCTTCCTTCTCCTTCTAGCATCTTCCACAGTCGAAGCAGGCGTAGGCACAGGATGAACAGTATACCCCCCATTAGCAGGCAACCTGGCCCACGCCGGAGCCTCAGTAGACCTAGCAATTTTCTCCCTACATTTAGCCGGTATCTCCTCAATCCTAGGGGCTATCAACTTCATCACAACCGCAATTAACATAAAACCGCCTGCTCTATCACAATACCAAACCCCCTTATTCGTCTGATCAGTCCTAATTACTGCAGTCCTACTACTACTCTCCCTACCAGTCCTTGCCGCAGGCATCACAATACTCCTTACAGACCGCAACCTCAACACTACATTCTTTGACCCCGCCGGAGGCGGAGACCCCGTATTATACCAACAT
>gi|197256921|gb|FJ028337.1|_Sturnella_loyca_voucher_MACN-Or-ct_597_cytochrome_oxidase_subunit_1_(COI)_gene_partial_cds_mitochondrial
CTATACCTAATTTTCGGCGCTTGAGCCGGAATAGTAGGTACCGCCCTAAGCCTTCTCATCCGAGCAGAACTTGGCCAACCCGGAGCTCTTCTAGGAGACGACCAAGTCTACAACGTAGTCGTCACGGCCCATGCCTTCGTAATAATCTTCTTCATAGTCATACCAATTATAATCGGAGGGTTCGGGAACTGACTCGTTCCCCTAATAATTGGAGCCCCAGACATAGCATTCCCACGAATAAACAATATAAGCTTCTGACTACTACCCCCATCCTTCCTCCTACTCCTAGCATCCTCCACAGTCGAAGCGGGCGTAGGCACAGGATGAACAGTGTACCCCCCACTAGCAGGCAACCTGGCCCACGCCGGAGCCTCAGTGGACCTAGCAATTTTCTCCCTACACTTAGCCGGTATCTCCTCAATCCTAGGGGCTATCAACTTCATCACAACCGCAATCAACATGAAACCACCTGCCCTATCACAATACCAAACCCCTTTATTTGTCTGATCAGTCCTAATCACTGCAGTCCTCCTACTACTATCCCTCCCAGTCCTCGCCGCAGGCATTACAATACTCCTTACAGACCGCAACCTTAACACTACATTCTTCGACCCTGCCGGAGGCGGAGACCCTGTATTATACCAACAC
>gi|197256917|gb|FJ028335.1|_Sturnella_loyca_voucher_MACN-Or-ct_549_cytochrome_oxidase_subunit_1_(COI)_gene_partial_cds_mitochondrial
CTATACCTAATTTTCGGCGCTTGAGCCGGAATAGTAGGTACCGCCCTAAGCCTTCTCATCCGAGCAGAACTTGGCCAACCCGGAGCTCTTCTAGGAGACGACCAAGTCTACAACGTAGTCGTCACGGCCCATGCCTTCGTAATAATCTTCTTCATAGTCATACCAATTATAATCGGAGGGTTCGGGAACTGACTCGTTCCCCTAATAATTGGAGCCCCAGACATAGCATTCCCACGAATAAACAATATAAGCTTCTGACTACTACCCCCATCCTTCCTCCTACTCCTAGCATCCTCCACAGTCGAAGCGGGCGTAGGCACAGGATGAACAGTGTACCCCCCACTAGCAGGCAACCTGGCCCACGCCGGAGCCTCAGTGGACCTAGCAATTTTCTCCCTACACTTAGCCGGTATCTCCTCAATCCTAGGGGCTATCAACTTCATCACAACCGCAATCAACATAAAACCACCTGCCCTATCACAATACCAAACCCCTTTATTTGTCTGATCAGTCCTAATCACTGCAGTCCTCCTACTACTATCCCTCCCAGTCCTCGCCGCAGGCATTACAATACTCCTTACAGACCGCAACCTTAACACTACATTCTTCGACCCTGCCGGAGGCGGAGACCCTGTATTATACCAACAC
>gi|197256913|gb|FJ028333.1|_Sturnella_loyca_voucher_MACN-Or-ct_056_cytochrome_oxidase_subunit_1_(COI)_gene_partial_cds_mitochondrial
CTATACCTAATTTTCGGCGCTTGAGCCGGAATAGTAGGTACCGCCCTAAGCCTTCTCATCCGAGCAGAACTTGGCCAACCCGGAGCTCTTCTAGGAGACGACCAAGTCTACAACGTAGTCGTCACGGCCCATGCCTTCGTAATAATCTTCTTCATAGTCATACCAATTATAATCGGAGGGTTCGGGAACTGACTCGTTCCCCTAATAATTGGAGCCCCAGACATAGCATTCCCACGAATAAACAATATAAGCTTCTGACTACTACCCCCATCCTTCCTCCTACTCCTAGCATCCTCCACAGTCGAAGCGGGCGTAGGCACAGGATGAACAGTGTACCCCCCACTAGCAGGCAACCTGGCCCACGCCGGAGCCTCAGTGGACCTAGCAATTTTCTCCCTACACTTAGCCGGTATCTCCTCAATCCTAGGGGCTATCAACTTCATCACAACCGCAATCAACATAAAACCACCTGCCCTATCACAATACCAAACCCCTTTATTTGTCTGATCAGTCCTAATCACTGCAGTCCTCCTACTATTATCCCTCCCAGTCCTCGCCGCAGGCATTACAATACTCCTTACAGACCGCAACCTTAACACTACATTCTTCGACCCTGCCGGAGGCGGAGACCCTGTATTATACCAACAC
>gi|197256909|gb|FJ028331.1|_Stigmatura_budytoides_voucher_MACN-Or-ct_281_cytochrome_oxidase_subunit_1_(COI)_gene_partial_cds_mitochondrial
CTATACTTGATCTTCGGCGCCTGAGCCGGTATAATTGGCACTGCCCTAAGTCTCCTCATCCGAGCAGAACTAGGACAACCAGGAACTCTCCTAGGAGATGACCAAATTTACAACGTAATCGTCACCGCCCATGCCTTCGTAATAATTTTCTTTATAGTTATGCCAATTATAATTGGAGGATTTGGCAACTGACTTGTACCCCTAATAATCGGTGCACCCGACATAGCATTTCCACGTATAAATAATATAAGCTTCTGATTACTCCCTCCATCATTTCTACTCCTCCTAGCTTCATCCACAGTAGAAGCCGGTGTAGGCACCGGATGAACTGTTTACCCCCCATTAGCCGGTAACCTAGCCCATGCTGGAGCTTCAGTAGATCTAGCTATCTTCTCCCTTCATCTCGCAGGTGTTTCTTCAATTCTAGGAGCAATCAACTTTATTACTACCGCAATCAACATAAAACCACCAGCCCTATCACAATACCAAACTCCTCTATTTGTATGATCAGTCCTAATCACTGCAGTTCTCCTCCTACTTTCTCTCCCAGTCCTTGCTGCCGGCATCACTATACTTCTCACAGACCGCAACCTTAACACTACATTCTTCGACCCTGCAGGAGGCGGAGACCCAGTCCTATATCAACAT
>gi|197256905|gb|FJ028329.1|_Stigmatura_budytoides_voucher_MACN-Or-ct_2802_cytochrome_oxidase_subunit_1_(COI)_gene_partial_cds_mitochondrial
CTATACTTGATCTTCGGCGCCTGAGCCGGTATAATTGGCACTGCCCTAAGTCTCCTCATCCGAGCAGAACTAGGACAACCAGGAACTCTCCTAGGAGATGACCAAATTTACAACGTAATCGTCACTGCCCATGCCTTCGTAATAATTTTCTTTATAGTTATGCCAATTATAATTGGAGGATTTGGCAACTGACTTGTACCCCTAATAATCGGTGCACCCGACATAGCATTTCCACGTATAAATAATATAAGCTTCTGATTACTCCCTCCATCATTTCTACTCCTCCTAGCTTCATCCACAGTAGAAGCCGGTGTAGGCACCGGATGAACTGTTTACCCCCCATTAGCCGGTAACCTAGCCCATGCTGGAGCTTCAGTAGACCTAGCTATCTTCTCCCTTCATCTCGCAGGTGTTTCTTCAATTCTAGGAGCAATCAACTTTATTACTACCGCAATCAACATAAAACCACCAGCCCTATCACAATACCAAACTCCTCTATTTGTATGATCAGTCCTAATCACTGCAGTTCTCCTCCTACTTTCTCTCCCAGTCCTTGCTGCCGGCATCACTATACTTCTCACAGACCGCAACCTTAACACTACATTCTTCGACCCTGCAGGAGGCGGAGACCCAGTCCTATATCAACAT
>gi|197256901|gb|FJ028327.1|_Sternula_superciliaris_voucher_MACN-Or-ct_1768_cytochrome_oxidase_subunit_1_(COI)_gene_partial_cds_mitochondrial
CTATACTTAATTTTCGGCGCATGAGCCGGTATAGTAGGTACTGCTCTAAGCCTACTTATTCGTGCAGAACTAGGTCAACCAGGAACTCTTTTAGGAGATGACCAAATCTACAACGTAATTGTCACCGCCCACGCCTTTGTAATAATTTTCTTTATAGTAATGCCTATCATAATCGGTGGCTTCGGAAACTGACTAGTGCCTCTCATAATTGGTGCCCCCGACATAGCATTTCCACGCATAAACAACATAAGCTTCTGACTGCTGCCCCCATCATTCTTACTCCTTCTAGCCTCTTCCACAGTAGAAGCTGGAGTAGGTACAGGATGAACTGTGTATCCTCCCCTAGCTGGCAATCTAGCCCATGCTGGAGCTTCAGTAGACTTAGCAATCTTCTCTCTTCACCTAGCAGGTGTATCTTCCATCCTAGGTGCTATCAATTTCATCACCACAGCCATCAACATAAAACCCCCTGCCCTTTCACAATATCAAACTCCTCTGTTCGTATGATCCGTACTCATCACTGCCGTCCTACTGCTACTTTCACTCCCAGTACTCGCTGCTGGCATTACCATGTTATTAACAGACCGAAACCTAAACACAACATTCTTCGACCCTGCTGGAGGTGGTGACCCTGTGCTATACCAACAT
>gi|197256897|gb|FJ028325.1|_Sterna_trudeaui_voucher_MACN-Or-ct_301_cytochrome_oxidase_subunit_1_(COI)_gene_partial_cds_mitochondrial
CTATACNTAATTTTCGGCGCATGAGCCGGTATAGTAGGTACTGCCCTTAGCCTACTCATTCGTGCAGAACTAGGTCAGCCAGGAACCCTCCTAGGGGACGACCAGATCTACAATGTAATCGTCACCGCCCACGCCTTTGTAATAATCTTCTTTATAGTAATACCCATCATAATTGGAGGCTTCGGAAACTGATTAGTTCCACTTATAATTGGTGCCCCTGACATAGCATTCCCACGTATAAACAACATAAGCTTCTGACTGCTCCCTCCATCATTCTTACTTCTCCTAGCCTCCTCCACAGTAGAAGCTGGGGCAGGTACAGGGTGAACTGTATACCCCCCTCTAGCTGGTAATCTAGCTCATGCTGGAGCTTCAGTGGACTTAGCAATCTTCTCCCTTCATCTGGCAGGTGTGTCCTCTATCCTAGGTGCTATCAACTTTATCACTACAGCCATCAACATGAAACCCCCTGCCCTTTCACAATACCAAACCCCTCTATTTGTATGATCAGTACTTATTACTGCCGTCCTACTACTACTTTCGCTCCCAGTACTCGCCGCCGGCATCACTATGTTGTTAACGGATCGAAACCTAAACACAACATTCTTTGACCCTGCCGGAGGTGGTGACCCTGTACTATACCAACAT
>gi|197256893|gb|FJ028323.1|_Stephanoxis_lalandi_voucher_MACN-Or-ct_2896_cytochrome_oxidase_subunit_1_(COI)_gene_partial_cds_mitochondrial
-------------TCGGGGCATGAGCTGGAATAGTTGGAACCGCCCTCAGCCTGCTAATCCGAGCAGAACTCGGCCAGCCAGGTACTCTACTAGGAGATGACCAAATCTACAATGTAATCGTTACTGCTCATGCTTTTGTAATAATCTTCTTCATAGTCATACCAATCATGATCGGAGGATTTGGAAATTGACTAATCCCCCTGATAATTGGAGCACCCGATATAGCATTCCCACGTATAAATAACATAAGCTTTTGACTCCTACCACCATCATTCCTCTTACTCCTCGCCTCCTCCACCGTAGAAGCAGGTGCAGGCACAGGGTGAACTGTGTACCCACCCCTAGCCGGCAACCTAGCCCATGCAGGAGCATCAGTGGACCTGGCCATCTTCTCTCTGCACCTATCTGGCATCTCATCAATCCTAGGAGCAATTAACTTCATCACCACTGCAATCAACATAAAACCACCCGCCCTATCACAATACCAAACCCCCCTGTTCGTTTGATCCGTCCTCATTACTGCCGTCCTACTCCTCCTCTCACTCCCAGTTCTCGCTGCAGGAATTACCATGCTACTAACAGACCGAAACCTAAACACCACCTTCTTTGACCCCGCCGGAGGAGGTGACCCCATCCTCTACCAACAC
>gi|197256889|gb|FJ028321.1|_Sporophila_ruficollis_voucher_MACN-Or-ct_3130_cytochrome_oxidase_subunit_1_(COI)_gene_partial_cds_mitochondrial
CTATACTTAATCTTCGGCGCATGAGCCGGAATAGTAGGTACCGCCCTAAGCCTCCTCATCCGAGCAGAACTAGGCCAACCTGGAGCCCTTCTAGGAGACGACCAAGTCTACAACGTAGTCGTCACAGCCCATGCTTTCGTAATAATCTTCTTCATAGTTATACCAATTATAATCGGAGGATTCGGAAACTGACTAGTCCCTCTAATAATTGGAGCCCCTGACATAGCATTCCCACGAATAAACAATATAAGCTTCTGACTACTCCCCCCATCCTTCCTTCTCCTCCTGGCATCCTCCACAGTCGAAGCAGGAGTCGGTACAGGCTGAACAGTATACCCTCCATTAGCCGGCAACCTAGCCCATGCTGGAGCCTCAGTTGACCTTGCAATCTTCTCACTGCACTTAGCTGGTATCTCTTCAATCCTAGGGGCAATCAACTTTATCACAACAGCAATCAACATAAAACCCCCTGCCCTCTCACAATACCAAACCCCACTGTTCGTTTGATCAGTCCTAATTACCGCAGTCCTACTGCTCCTATCCCTTCCAGTCCTTGCTGCAGGAATCACAATACTTCTTACAGACCGTAACCTCAACACAACGTTCTTCGACCCTGCTGGAGGAGGAGACCCCGTCCTATACCAACAC
>gi|197256885|gb|FJ028319.1|_Sporophila_ruficollis_voucher_MACN-Or-ct_2088_cytochrome_oxidase_subunit_1_(COI)_gene_partial_cds_mitochondrial
----------------GCGCATGAGCCGGAATAGTAGGTACCGCCCTAAGCCTCCTCATCCGAGCAGAACTAGGCCAACCTGGAGCCCTTCTAGGAGACGACCAAGTCTACAACGTAGTCGTCACAGCCCATGCTTTCGTAATAATCTTCTTCATAGTTATACCAATTATAATCGGAGGATTCGGAAACTGACTAGTCCCTCTAATAATTGGAGCCCCTGACATAGCATTCCCACGAATAAACAATATAAGCTTCTGACTACTCCCCCCATCCTTCCTTCTCCTCCTGGCATCCTCCACAGTCGAAGCAGGAGTCGGTACAGGCTGAACAGTATACCCTCCATTAGCCGGCAACCTAGCCCATGCTGGAGCCTCAGTTGACCTTGCAATCTTCTCACTGCACTTAGCTGGTATCTCTTCAATCCTAGGGGCAATCAACTTTATCACAACAGCAATCAACATAAAACCCCCTGCCCTCTCACAATACCAAACCCCACTGTTCGTTTGATCAGTCCTAATTACCGCAGTCCTACTGCTCCTATCCCTTCCAGTCCTTGCTGCAGGAATCACAATACTTCTTACAGACCGTAACCTCAACACAACGTTCTTCGACCCTGCTGGAGGAGGAGACCCCGTCCTATACCAACAC
>gi|197256881|gb|FJ028317.1|_Sporophila_palustris_voucher_MACN-Or-ct_3117_cytochrome_oxidase_subunit_1_(COI)_gene_partial_cds_mitochondrial
CTATACTTAATCTTCGGCGCATGAGCCGGAATAGTAGGTACCGCCCTAAGCCTCCTCATCCGAGCAGAACTAGGCCAACCTGGAGCCCTTCTAGGAGACGACCAAGTCTACAACGTAGTCGTCACAGCCCATGCTTTCGTAATAATCTTCTTCATAGTTATACCAATTATAATCGGAGGATTCGGAAACTGACTAGTCCCTCTAATAATTGGAGCCCCTGACATAGCATTCCCACGAATAAACAATATAAGCTTCTGACTACTCCCCCCATCCTTCCTTCTCCTCCTGGCATCCTCCACAATCGAAGCAGGAGTCGGTACAGGCTGAACAGTATACCCTCCATTAGCCGGCAACCTAGCCCATGCTGGAGCCTCAGTTGACCTTGCAATCTTCTCACTGCACTTAGCTGGTATCTCTTCAATCCTAGGGGCAATCAACTTTATCACAACAGCAATCAACATAAAACCCCCTGCCCTCTCACAATACCAAACCCCACTGTTCGTTTGATCAGTCCTAATTACCGCAGTCCTACTGCTCCTATCCCTTCCAGTCCTTGCTGCAGGAATCACAATACTTCTTACAGACCGTAACCTCAACACAACGTTCTTCGACCCTGCTGGAGGAGGAGACCCCGTCCTATACCAACAC
>gi|197256877|gb|FJ028315.1|_Sporophila_hypoxantha_voucher_MACN-Or-ct_3272_cytochrome_oxidase_subunit_1_(COI)_gene_partial_cds_mitochondrial
CTATACTTAATCTTCGGCGCATGAGCCGGAATAGTAGGTACCGCCCTAAGCCTCCTCATCCGGGCAGAACTAGGCCAACCTGGAGCCCTTCTAGGAGACGACCAAGTCTACAACGTAGTCGTCACAGCCCATGCTTTCGTAATAATCTTCTTCATAGTTATACCAATTATAATCGGAGGATTCGGAAACTGACTAGTCCCTCTAATAATTGGAGCCCCTGACATAGCATTCCCACGAATAAACAATATAAGCTTCTGACTACTCCCCCCATCCTTCCTTCTCCTCCTGGCATCCTCCACAGTCGAAGCAGGAGTCGGTACAGGCTGAACAGTATACCCTCCATTAGCCGGCAACCTAGCCCATGCTGGAGCTTCAGTTGACCTTGCAATCTTCTCACTGCACTTAGCTGGTATCTCTTCAATCCTAGGGGCAATCAACTTTATCACAACAGCAATCAACATAAAACCCCCTGCCCTCTCACAATACCAAACCCCACTGTTCGTTTGATCAGTCCTAATTACCGCAGTCCTACTGCTCCTATCCCTTCCAGTCCTTGCTGCAGGAATCACAATACTTCTTACAGACCGTAACCTCAACACAACGTTCTTCGACCCTGCTGGAGGAGGAGACCCCGTCCTATACCAACAC
>gi|197256873|gb|FJ028313.1|_Sporophila_hypoxantha_voucher_MACN-Or-ct_3252_cytochrome_oxidase_subunit_1_(COI)_gene_partial_cds_mitochondrial
CTATACTTAATCTTCGGCGCATGAGCCGGAATAGTAGGTACCGCCCTAAGCCTCCTCATCCGAGCAGAACTAGGCCAACCTGGAGCCCTTCTAGGAGACGACCAAGTCTACAACGTAGTCGTCACAGCCCATGCTTTCGTAATAATCTTCTTCATAGTTATACCAATTATAATCGGAGGATTCGGAAACTGACTAGTCCCTCTAATAATTGGAGCCCCTGACATAGCATTCCCACGAATAAACAATATAAGCTTCTGACTACTCCCCCCATCCTTCCTTCTCCTCCTGGCATCCTCCACAGTCGAAGCAGGAGTCGGTACAGGCTGAACAGTATACCCTCCATTAGCCGGCAACCTAGCCCATGCTGGAGCCTCAGTTGACCTTGCAATCTTCTCACTGCACTTAGCTGGTATCTCTTCAATCCTAGGGGCAATCAACTTTATCACAACAGCAATCAACATAAAACCCCCTGCCCTCTCACAATACCAAACCCCACTGTTCGTTTGATCAGTCCTAATTACCGCAGTCCTACTGCTCCTATCCCTTCCAGTCCTTGCTGCAGGAATCACAATACTTCTTACAGACCGTAACCTCAACACAACGTTCTTTGACCCTGCTGGAGGAGGAGACCCCGTCCTATACCAACAC
>gi|197256869|gb|FJ028311.1|_Sporophila_hypochroma_voucher_MACN-Or-ct_3131_cytochrome_oxidase_subunit_1_(COI)_gene_partial_cds_mitochondrial
CTATACTTAATCTTCGGCGCATGAGCCGGAATAGTAGGTACCGCCCTAAGCCTCCTCATCCGAGCAGAACTAGGCCAACCTGGAGCCCTTCTAGGAGACGACCAAGTCTACAACGTAGTCGTCACAGCCCATGCTTTCGTAATAATCTTCTTCATAGTTATACCAATTATAATCGGAGGATTCGGAAACTGACTAGTCCCTCTAATAATTGGAGCCCCTGACATAGCATTCCCACGAATAAACAATATAAGCTTCTGACTACTCCCCCCATCCTTCCTTCTCCTCCTGGCATCCTCCACAGTCGAAGCAGGAGTCGGTACAGGCTGAACAGTATACCCTCCATTAGCCGGCAACCTAGCCCATGCTGGAGCCTCAGTTGACCTTGCAATCTTCTCACTGCACTTAGCTGGTATCTCTTCAATCCTAGGGGCAATCAACTTTATCACAACAGCAATCAACATAAAACCCCCTGCCCTCTCACAATACCAAACCCCACTGTTCGTTTGATCAGTCCTAATTACCGCAGTCCTACTGCTCCTATCCCTTCCAGTCCTTGCTGCAGGAATCACAATACTTCTTACAGACCGTAACCTCAACACAACGTTCTTCGACCCTGCTGGAGGAGGAGACCCCGTCCTATACCAACAC
>gi|197256865|gb|FJ028309.1|_Sporophila_collaris_voucher_MACN-Or-ct_1683_cytochrome_oxidase_subunit_1_(COI)_gene_partial_cds_mitochondrial
CTGTACTTAATTTTCGGCGCATGAGCCGGAATAGTAGGTACCGCCCTAAGCCTCCTTATCCGGGCAGAACTAGGCCAACCTGGAGCCCTCCTTGGAGACGACCAAGTCTACAACGTAGTCGTCACAGCCCATGCCTTCGTAATAATCTTCTTCATAGTTATACCAATCATAATCGGAGGGTTCGGAAACTGACTAGTCCCTCTAATAATTGGAGCCCCTGACATAGCATTCCCACGAATAAACAATATAAGCTTCTGACTACTCCCCCCATCCTTCCTCCTCCTCCTAGCATCCTCCACAGTCGAAGCAGGAGCCGGTACAGGCTGAACAGTATACCCCCCACTAGCCGGTAACCTAGCCCACGCCGGAGCCTCAGTCGACCTTGCAATCTTCTCATTACACTTAGCCGGTATCTCTTCAATCTTAGGGGCAATCAATTTCATTACAACAGCAGTCAACATGAAACCCCCTGCCCTCTCACAATACCAAACTCCACTATTCGTCTGATCAGTGTTAATCACCGCAGTCCTTCTGCTCCTGTCCCTCCCAGTTCTCGCCGCAGGAATCACAATGCTCCTTACAGACCGCAACCTCAATACAACATTCTTCGACCCCGCCGGAGGAGGAGACCCCGTCCTATACCAGCAT
>gi|197256861|gb|FJ028307.1|_Sporophila_collaris_voucher_MACN-Or-ct_3202_cytochrome_oxidase_subunit_1_(COI)_gene_partial_cds_mitochondrial
CTGTACTTAATNTTCGGCGCATGAGCCGGAATAGTAGGTACCGCCCTAAGCCTCCTTATCCGGGCAGAACTAGGCCAACCTGGAGCCCTCCTTGGAGACGACCAAGTCTACAACGTAGTCGTCACAGCCCATGCCTTCGTAATAATCTTCTTCATAGTTATACCAATCATAATCGGAGGGTTCGGAAACTGACTAGTCCCTCTAATAATTGGAGCCCCTGACATAGCATTCCCACGAATAAACAATATAAGCTTCTGACTACTCCCCCCATCCTTCCTCCTCCTCCTAGCATCCTCCACAGTCGAAGCAGGAGCCGGTACAGGCTGAACAGTATACCCCCCACTAGCCGGTAACCTAGCCCACGCCGGAGCCTCAGTCGACCTTGCAATCTTCTCATTACACTTAGCCGGTATCTCTTCAATCTTAGGGGCAATCAATTTCATTACAACAGCAGTCAACATGAAACCCCCTGCCCTCTCACAATACCAAACTCCACTATTCGTCTGATCAGTGTTAATCACCGCAGTCCTTCTGCTCCTGTCCCTCCCAGTTCTCGCCGCAGGAATCACAATGCTCCTTACAGACCGCAACCTCAATACAACATTCTTCGACCCCGCCGGAGGAGGAGACCCCGTCCTATACCAGCAT
>gi|197256857|gb|FJ028305.1|_Sporophila_cinnamomea_voucher_MACN-Or-ct_3121_cytochrome_oxidase_subunit_1_(COI)_gene_partial_cds_mitochondrial
CTATACTTAATCTTCGGCGCATGAGCCGGAATAGTAGGTACCGCCCTAAGCCTCCTCATCCGAGCAGAACTAGGCCAACCTGGAGCCCTTCTAGGAGACGACCAAGTCTACAACGTAGTCGTCACAGCCCATGCTTTCGTAATAATCTTCTTCATAGTTATACCAATTATAATCGGAGGATTCGGAAACTGACTAGTCCCTCTAATAATTGGAGCCCCTGACATAGCATTCCCACGAATAAACAATATAAGCTTCTGACTACTCCCCCCATCCTTCCTTCTCCTCCTGGCATCTTCCACAATCGAAGCAGGAGTCGGTACAGGTTGAACAGTATACCCTCCACTAGCCGGCAACCTAGCCCATGCTGGAGCCTCAGTTGACCTTGCAATCTTCTCACTGCACTTAGCTGGTATCTCTTCAATCCTAGGGGCAATCAACTTTATCACAACAGCAATCAACATAAAACCCCCTGCCCTCTCACAATACCAAACCCCACTGTTCGTTTGATCAGTCCTAATTACTGCAGTCCTACTACTCCTGTCCCTTCCAGTCCTTGCTGCAGGAATCACAATACTTCTTACAGACCGTAACCTCAACACAACGTTCTTCGACCCTGCTGGAGGAGGAGACCCCGTCCTATACCAACAC
>gi|197256853|gb|FJ028303.1|_Sporophila_caerulescens_voucher_MACN-Or-ct_3232_cytochrome_oxidase_subunit_1_(COI)_gene_partial_cds_mitochondrial
CTGTACCTAATTTTCGGCGCATGAGCCGGAATAGTAGGTACCGCCCTAAGCCTCCTTATCCGAGCAGAGCTAGGCCAACCCGGAGCCCTCCTCGGAGACGACCAAGTTTACAACGTAGTCGTTACAGCCCATGCTTTCGTAATAATTTTCTTCATAGTTATACCAATTATGATCGGAGGATTCGGAAACTGACTAGTCCCTTTAATAATTGGAGCCCCTGACATAGCATTCCCACGAATAAACAATATAAGCTTCTGACTACTCCCTCCATCTTTCCTTCTTCTCCTAGCATCTTCCACAGTCGAAGCAGGAGTCGGTACAGGTTGAACAGTATACCCCCCACTAGCTGGCAACCTAGCCCACGCCGGAGCCTCAGTCGACCTCGCAATTTTCTCACTACACTTAGCTGGTATCTCTTCAATCTTAGGGGCTATCAACTTCATTACAACAGCAATTAACATGAAACCCCCTGCTCTCTCACAATACCAAACCCCACTATTCGTTTGATCCGTACTAATCACTGCAGTCTTACTACTCCTATCTCTCCCAGTTCTTGCTGCAGGAATCACAATACTCCTCACAGATCGTAACCTCAATACAACATTCTTCGACCCCGCGGGAGGAGGAGACCCCATCCTGTACCAGCAT
>gi|197256849|gb|FJ028301.1|_Sporophila_caerulescens_voucher_MACN-Or-ct_3192_cytochrome_oxidase_subunit_1_(COI)_gene_partial_cds_mitochondrial
CTGTACCTAATTTTCGGCGCATGAGCCGGAATAGTAGGTACCGCCCTAAGCCTCCTTATCCGAGCAGAGCTAGGCCAACCCGGAGCCCTCCTCGGAGACGACCAAGTTTACAACGTAGTCGTTACAGCCCATGCTTTCGTAATAATTTTCTTCATAGTTATACCAATTATGATCGGAGGATTCGGAAACTGACTAGTCCCTTTAATAATTGGAGCCCCTGACATAGCATTCCCACGAATAAACAATATAAGCTTCTGACTACTCCCTCCATCTTTCCTTCTTCTCCTAGCATCTTCCACAGTCGAAGCAGGAGTCGGTACAGGTTGAACAGTATACCCCCCACTAGCTGGCAACCTAGCCCACGCCGGAGCCTCAGTCGACCTCGCAATTTTCTCACTACACTTAGCTGGTATCTCTTCAATCTTAGGGGCTATCAACTTCATTACAACAGCAATTAACATGAAACCCCCTGCTCTCTCACAATACCAAACCCCACTATTCGTTTGATCCGTACTAATCACTGCAGTCTTACTACTCCTATCTCTCCCAGTTCTTGCTGCAGGAATCACAATACTCCTCACAGATCGCAACCTCAATACAACATTCTTCGACCCCGCGGGAGGAGGAGACCCCATTCTGTACCAGCAT
>gi|197256845|gb|FJ028299.1|_Sporophila_caerulescens_voucher_MACN-Or-ct_1462_cytochrome_oxidase_subunit_1_(COI)_gene_partial_cds_mitochondrial
CTGTACCTAATTTTCGGCGCATGAGCCGGAATAGTAGGTACCGCCCTAAGCCTCCTTATCCGAGCAGAGCTAGGCCAACCCGGAGCCCTCCTCGGAGACGACCAAGTTTACAACGTAGTCGTTACAGCCCATGCTTTCGTAATAATTTTCTTCATAGTTATACCAATTATGATCGGAGGATTCGGAAACTGACTAGTCCCTTTAATAATTGGAGCCCCTGACATAGCATTCCCACGAATAAACAATATAAGCTTCTGACTACTCCCTCCATCTTTCCTTCTTCTCCTAGCATCTTCCACAGTCGAAGCAGGAGTCGGTACAGGTTGAACAGTATACCCCCCACTAGCTGGCAACCTAGCCCACGCCGGAGCCTCAGTCGACCTCGCAATTTTCTCACTACACTTAGCTGGTATCTCTTCAATCTTAGGGGCTATCAACTTCATTACAACAGCAATTAACATGAAACCCCCTGCTCTCTCACAATACCAAACCCCACTATTCGTTTGATCCGTACTAATCACTGCAGTCTTACTACTCCTATCTCTCCCAGTTCTTGCTGCAGGAATCACAATACTCCTCACAGATCGCAACCTCAATACAACATTCTTCGACCCCGCGGGAGGAGGAGACCCCATCCTGTACCAGCAT
>gi|197256841|gb|FJ028297.1|_Spheniscus_magellanicus_voucher_MACN-Or-ct_1346_cytochrome_oxidase_subunit_1_(COI)_gene_partial_cds_mitochondrial
CTTTACCTAATCTTCGGCGCATGAGCAGGCATAGCCGGAACCGCCCTCAGCCTGCTCATCCGCGCAGAACTCGGTCAACCCGGAACCCTCCTAGGAGACGACCAGATCTACAATGTAATTGTTACCGCCCATGCCTTCGTAATAATCTTCTTCATAGTAATACCCATCATAATCGGAGGATTTGGAAACTGACTAGTCCCACTTATAATCGGCGCCCCCGACATAGCATTTCCCCGCATAAATAACATAAGCTTTTGACTACTACCTCCCTCCTTCCTACTCCTACTAGCCTCCTCCACAGTAGAAGCAGGAGCCGGCACAGGATGAACCGTATACCCACCATTAGCAGGCAACCTAGCCCATGCCGGCGCATCAGTAGACCTAGCCATTTTTTCACTCCACCTAGCAGGAATCTCCTCCATCCTAGGAGCAATCAACTTCATCACCACCGCCACTAACATAAAACCCCCAGCCCTATCACAATACCAAACCCCCCTGTTCGTATGATCCGTCCTTATCACAGCTGTCCTCCTACTACTCTCACTTCCCGTACTTGCTGCCGGCATCACCATGCTACTAACAGACCGAAACCTAAACACCACCTTCTTCGATCCAGCTGGAGGGGGAGACCCAATCCTATACCAGCAC
>gi|197256837|gb|FJ028295.1|_Spheniscus_magellanicus_voucher_MACN-Or-ct_1345_cytochrome_oxidase_subunit_1_(COI)_gene_partial_cds_mitochondrial
CTTTACCTAATCTTCGGCGCATGAACAGGCATAGCCGGAACCGCCCTCAGCCTGCTCATCCGCGCAGAACTCGGTCAACCCGGAACCCTCCTAGGAGACGACCAGATCTACAATGTAATTGTTACCGCCCATGCCTTCGTAATAATCTTCTTCATAGTAATACCCATCATAATCGGAGGATTTGGAAACTGACTAGTCCCACTTATAATCGGCGCCCCCGACATAGCATTTCCCCGCATAAATAACATAAGCTTTTGACTACTACCTCCCTCCTTCCTACTCCTACTAGCCTCCTCCACAGTAGAAGCAGGAGCCGGCACAGGATGAACCGTATACCCACCATTAGCAGGCAACCTAGCCCATGCCGGCGCATCAGTAGACCTAGCCATTTTTTCACTCCACCTAGCAGGAATCTCCTCCATCCTAGGAGCAATCAACTTCATCACCACCGCCACTAACATAAAACCCCCAGCCCTATCACAATACCAAACCCCCCTGTTCGTATGATCCGTCCTTATCACAGCTGTCCTCCTACTACTCTCACTTCCCGTACTTGCTGCCGGCATCACCATGCTACTAACAGACCGAAACCTAAACACCACCTTCTTCGATCCAGCTGGAGGGGGAGACCCAATCCTATACCAGCAC
>gi|197256833|gb|FJ028293.1|_Sittasomus_griseicapillus_voucher_MACN-Or-ct_2392_cytochrome_oxidase_subunit_1_(COI)_gene_partial_cds_mitochondrial
CTCTACCTAATCTTCGGAGCATGAGCCGGCATAATTGGAACTGCCCTAAGCCTCCTAATCCGAGCTGAACTTGGACAACCAGGTACCCTTTTAGGTGATGATCAAATCTACAATGTCATCGTAACTGCCCATGCTTTCGTAATAATCTTCTTTATAGTTATACCCATCATAATCGGAGGATTTGGCAACTGACTAGTCCCACTAATAATTGGCGCCCCTGATATAGCATTCCCACGAATAAACAACATAAGCTTCTGACTTTTACCTCCATCCTTCCTACTGCTTCTAGCTTCCTCCACAGTAGAAGCAGGCGCAGGAACAGGATGAACAGTATATCCACCTCTAGCAGGCAATCTAGCCCATGCAGGAGCTTCAGTAGACCTAGCTATCTTTTCTCTACACCTAGCTGGTGTATCTTCCATTTTAGGAGCAATCAACTTTATCACAACCGCAATTAATATAAAACCACCAGCCCTATCACAATACCAAACTCCTCTATTCGTTTGATCCGTCCTTATCACTGCCGTTTTACTTCTCCTCTCTCTACCTGTCCTAGCCGCTGGCATCACAATGCTCTTAACAGACCGTAACCTAAACACCACATTCTTTGACCCAGCTGGAGGTGGAGACCCAATCCTATACCAACAC
>gi|197256829|gb|FJ028291.1|_Sittasomus_griseicapillus_voucher_MACN-Or-ct_908_cytochrome_oxidase_subunit_1_(COI)_gene_partial_cds_mitochondrial
CTCTACCTAATCTTCGGAGCATGAGCCGGCATAATTGGAACTGCCCTAAGCCTCCTAATCCGAGCTGAACTTGGACAACCAGGTACCCTTTTAGGTGATGATCAAATCTACAATGTCATCGTAACTGCCCATGCTTTCGTAATAATCTTCTTTATAGTTATACCCATCATAATCGGAGGATTTGGCAACTGACTAGTCCCACTAATAATTGGCGCCCCTGATATAGCATTCCCACGAATAAACAACATAAGCTTCTGACTTTTACCTCCATCCTTCCTACTGCTTCTAGCTTCCTCCACAGTAGAAGCAGGCGCAGGAACAGGATGAACAGTATATCCACCTCTAGCAGGCAATCTAGCCCATGCAGGAGCTTCAGTAGACCTAGCTATCTTTTCTCTACACCTAGCTGGTGTATCTTCCATTTTAGGAGCAATCAACTTTATCACAACCGCAATTAATATAAAACCACCAGCCCTATCACAATACCAAACTCCTCTATTCGTTTGATCCGTCCTTATCACTGCCGTTTTACTTCTCCTCTCTCTACCTGTCCTAGCCGCTGGCATCACAATGCTCTTAACAGACCGTAACCTAAACACCACATTCTTTGACCCAGCTGGAGGTGGAGACCCAATCCTATACCAACAC
>gi|197256825|gb|FJ028289.1|_Sittasomus_griseicapillus_voucher_MACN-Or-ct_1124_cytochrome_oxidase_subunit_1_(COI)_gene_partial_cds_mitochondrial
CTCTACCTAATCTTCGGAGCATGAGCCGGCATAATTGGAACTGCCCTAAGCCTCCTAATCCGAGCTGAACTTGGACAACCAGGTACCCTTTTAGGTGATGATCAAATCTACAATGTCATCGTAACTGCCCATGCTTTCGTAATAATCTTCTTTATAGTTATACCCATCATAATCGGAGGATTTGGCAACTGACTAGTCCCACTAATAATTGGCGCCCCTGATATAGCATTCCCACGAATAAACAACATAAGCTTCTGACTTTTACCTCCATCCTTCCTACTGCTTCTAGCTTCCTCCACAGTAGAAGCAGGCGCAGGAACAGGATGAACAGTATATCCACCTCTAGCAGGCAATCTAGCCCATGCAGGAGCTTCAGTAGACCTAGCTATCTTTTCTCTACACCTAGCTGGTGTATCTTCCATTTTAGGAGCAATCAACTTTATCACAACCGCAATTAATATAAAACCACCAGCCCTATCACAATACCAAACTCCTCTATTCGTTTGATCCGTCCTTATCACTGCCGTTTTACTTCTCCTCTCTCTACCTGTCCTAGCCGCTGGCATCACAATGCTCTTAACAGACCGTAACCTAAACACCACATTCTTTGACCCAGCTGGAGGTGGAGACCCAATCCTATACCAACAC
>gi|197256821|gb|FJ028287.1|_Sittasomus_griseicapillus_voucher_MACN-Or-ct_3169_cytochrome_oxidase_subunit_1_(COI)_gene_partial_cds_mitochondrial
---------------GGAGCATGAGCCGGCATAATTGGAACTGCCCTAAGCCTCCTAATCCGAGCTGAACTTGGACAACCAGGTACCCTTTTAGGTGATGATCAAATCTACAATGTCATCGTAACTGCCCATGCTTTCGTAATAATCTTCTTTATAGTTATACCCATCATAATCGGAGGATTTGGCAACTGACTAGTCCCACTAATAATTGGCGCCCCTGATATAGCATTCCCACGAATAAACAACATAAGCTTCTGACTTTTACCTCCATCCTTCCTACTGCTTCTAGCTTCCTCCACAGTAGAAGCAGGCGCAGGAACAGGATGAACAGTATATCCACCTCTAGCAGGCAATCTAGCCCATGCAGGAGCTTCAGTAGACCTAGCTATCTTTTCTCTACACCTAGCTGGTGTATCTTCCATTTTAGGAGCAATCAACTTTATCACAACCGCAATTAATATAAAACCACCAGCCCTATCACAATACCAAACTCCTCTATTCGTTTGATCCGTCCTTATCACTGCCGTTTTACTTCTCCTCTCTCTACCTGTCCTAGCCGCTGGCATCACAATGCTCTTAACAGACCGTAACCTAAACACCACATTCTTTGACCCAGCTGGAGGTGGAGACCCAATCCTATACCAACAC
>gi|197256817|gb|FJ028285.1|_Sicalis_olivascens_voucher_MACN-Or-ct_1307_cytochrome_oxidase_subunit_1_(COI)_gene_partial_cds_mitochondrial
CTGTACCTAATCTTCGGCGCGTGAGCTGGAATAGTAGGTACCGCCCTAAGCCTCCTTATCCGAGCAGAACTAGGCCAACCTGGAGCCCTCCTAGGAGACGACCAAGTATACAATGTAGTCGTCACGGCCCATGCTTTCGTAATGATTTTCTTCATAGTTATACCAATTATAATTGGGGGGTTCGGAAACTGACTTGTTCCCCTAATAATTGGAGCCCCAGACATAGCATTCCCCCGAATGAATAACATAAGCTTCTGACTACTCCCCCCATCTTTCCTCCTCCTTCTAGCATCCTCTACAGTTGAAGCAGGCGTTGGTACAGGCTGAACAGTATATCCCCCTCTAGCTGGCAACCTAGCCCATGCCGGAGCCTCCGTTGACCTTGCAATCTTCTCCTTACACCTAGCCGGTATCTCCTCAATCCTTGGAGCAATCAACTTCATTACAACAGCAATTAACATAAAACCTCCTGCCCTTTCACAATACCAAACACCCCTATTCGTTTGATCAGTATTAATTACCGCAGTATTATTACTCTTATCCCTACCAGTTCTCGCTGCAGGAATCACAATACTACTCACAGACCGCAATCTTAACACTACATTCTTTGACCCCGCTGGAGGAGGAGACCCAGTACTTTACCAACAC
>gi|197256813|gb|FJ028283.1|_Sicalis_olivascens_voucher_MACN-Or-ct_1054_cytochrome_oxidase_subunit_1_(COI)_gene_partial_cds_mitochondrial
CTGTACCTAATCTTCGGCGCGTGAGCTGGAATAGTAGGTACCGCCCTAAGCCTCCTTATCCGAGCAGAACTAGGCCAACCTGGAGCCCTCCTAGGAGACGACCAAGTATACAATGTAGTCGTCACGGCCCATGCTTTCGTAATGATTTTCTTCATAGTTATACCAATTATAATTGGGGGGTTCGGAAACTGACTTGTTCCCCTAATAATTGGAGCCCCAGACATAGCATTCCCCCGAATGAATAACATAAGCTTCTGACTACTCCCCCCATCTTTCCTCCTCCTTCTAGCATCCTCTACAGTTGAAGCAGGCGTTGGTACAGGCTGAACAGTATATCCCCCTCTAGCTGGCAACCTAGCCCATGCCGGAGCCTCCGTTGACCTTGCAATCTTCTCCTTACACCTAGCCGGTATCTCCTCAATCCTTGGGGCAATCAACTTCATTACAACAGCAATTAACATAAAACCTCCTGCCCTTTCACAATACCAAACACCCCTATTCGTTTGATCAGTACTAATTACCGCAGTATTATTACTCTTATCCCTACCAGTTCTCGCTGCAGGAATCACAATACTACTCACAGACCGCAATCTTAACACTACATTCTTTGACCCCGCTGGAGGAGGAGACCCAGTACTTTACCAACAC
>gi|197256809|gb|FJ028281.1|_Sicalis_olivascens_voucher_MACN-Or-ct_1303_cytochrome_oxidase_subunit_1_(COI)_gene_partial_cds_mitochondrial
CTGTACNTAATCTTCGGCGCGTGAGCTGGAATAGTAGGTACCGCCCTAAGCCTCCTTATCCGAGCAGAACTAGGCCAACCTGGAGCCCTCCTAGGAGACGACCAAGTATACAATGTAGTCGTCACGGCCCATGCTTTCGTAATGATTTTCTTCATAGTTATACCAATTATAATTGGGGGGTTCGGAAACTGACTTGTTCCCCTAATAATTGGAGCCCCAGACATAGCATTCCCCCGAATGAATAACATAAGCTTCTGACTACTCCCCCCATCTTTCCTCCTCCTTCTAGCATCCTCTACAGTTGAAGCAGGCGTTGGTACAGGCTGAACAGTATATCCCCCTCTAGCTGGCAACCTAGCCCATGCCGGAGCCTCCGTTGACCTTGCAATCTTCTCCTTACACCTAGCCGGTATCTCCTCAATCCTTGGAGCAATCAACTTCATTACAACAGCAATTAACATAAAACCTCCTGCCCTTTCACAATACCAAACACCCCTATTCGTTTGATCAGTACTAATTACCGCAGTATTATTACTCTTATCCCTACCAGTTCTCGCTGCAGGAATCACAATACTACTCACAGACCGCAATCTTAACACTACATTCTTTGACCCCGCTGGAGGAGGAGACCCAGTACTTTACCAACAC
>gi|197256805|gb|FJ028279.1|_Sicalis_luteola_voucher_MACN-Or-ct_2818_cytochrome_oxidase_subunit_1_(COI)_gene_partial_cds_mitochondrial
CTGTACCTAATCTTTGGCGCATGAGCCGGGATAGTAGGTACTGCCCTAAGCCTCCTTATTCGAGCAGAACTGGGTCAACCCGGAGCCCTTCTAGGAGACGACCAGGTATACAACGTAGTCGTCACGGCCCATGCTTTCGTAATAATCTTCTTCATAGTTATGCCAATCATAATCGGAGGGTTTGGAAACTGACTTGTTCCCCTAATAATTGGAGCTCCAGATATAGCATTCCCACGAATAAACAACATAAGCTTCTGATTACTTCCCCCATCCTTCCTCCTTCTTCTAGCTTCCTCTACAGTTGAAGCAGGCGCCGGTACAGGTTGAACAGTATACCCCCCTCTAGCTGGTAATCTAGCCCACGCCGGAGCTTCTGTTGACCTCGCAATTTTCTCGCTCCACTTAGCCGGTATCTCATCAATTTTAGGGGCAATCAACTTCATCACAACAGCAATCAATATAAAACCCCCAGCCCTTTCACAATACCAAACCCCCCTATTCGTCTGATCAGTACTAATTACCGCAGTATTATTACTCCTATCCCTCCCAGTCCTTGCCGCAGGAATCACAATACTCCTTACAGACCGCAACCTTAACACCACATTCTTCGACCCCGCTGGAGGAGGAGACCCTGTCCTATACCAGCAC
>gi|197256801|gb|FJ028277.1|_Sicalis_luteola_voucher_MACN-Or-ct_017_cytochrome_oxidase_subunit_1_(COI)_gene_partial_cds_mitochondrial
CTGTACCTAATCTTTGGCGCATGAGCCGGGATAGTAGGTACTGCCCTAAGCCTCCTTATTCGAGCAGAACTGGGTCAACCCGGAGCCCTTCTAGGAGACGACCAGGTATACAACGTAGTCGTCACGGCCCATGCTTTCGTAATAATCTTCTTCATAGTTATGCCAATCATAATCGGAGGGTTTGGAAACTGACTTGTTCCCCTAATAATTGGAGCTCCAGATATAGCATTCCCACGAATAAACAACATAAGCTTCTGATTACTTCCCCCATCCTTCCTCCTTCTTCTAGCTTCCTCTACAGTTGAAGCAGGCGCCGGTACAGGTTGAACAGTATACCCCCCTCTAGCTGGTAATCTAGCCCACGCCGGAGCTTCTGTTGACCTCGCAATTTTCTCGCTCCACTTAGCCGGTATCTCATCAATTTTAGGGGCAATCAACTTCATCACAACAACAATCAATATAAAACCCCCAGCCCTTTCACAATACCAAACCCCCCTATTCGTCTGATCAGTACTAATTACCGCAGTATTATTACTCCTATCCCTCCCAGTCCTTGCCGCAGGAATCACAATACTCCTTACAGACCGCAACCTTAACACCACATTCTTCGACCCCGCTGGAGGAGGAGACCCTGTCCTATACCAGCAC
>gi|197256797|gb|FJ028275.1|_Sicalis_luteola_voucher_MACN-Or-ct_561_cytochrome_oxidase_subunit_1_(COI)_gene_partial_cds_mitochondrial
CTGTACCTAATCTTTGGCGCATGAGCCGGGATAGTAGGTACTGCCCTAAGCCTCCTTATTCGAGCAGAACTGGGTCAACCCGGAGCCCTTCTAGAAGACGACCAGGTATACAACGTAGTCGTCACGGCCCATGCTTTCGTAATAATCTTCTTCATAGTTATGCCAATCATAATCGGAGGGTTTGGAAACTGACTTGTTCCCCTAATAATTGGAGCTCCAGATATAGCATTCCCACGAATAAACAACATAAGCTTCTGATTACTTCCCCCATCCTTCCTCCTTCTTCTAGCTTCCTCTACAGTTGAAGCAGGCGCCGGTACAGGCTGAACAGTATACCCCCCTCTAGCTGGTAATCTAGCCCACGCCGGAGCTTCTGTTGACCTCGCAATTTTCTCGCTCCACTTAGCCGGTATCTCATCAATTTTAGGGGCAATCAACTTCATCACAACAGCAATCAATATAAAACCCCCAGCCCTTTCACAATACCAAACCCCCCTATTCGTCTGATCAGTACTAATTACCGCAGTATTATTACTCCTATCCCTCCCAGTCCTTGCCGCAGGAATCACAATACTCCTTACAGACCGCAACCTTAACACCACATTCTTCGACCCCGCTGGAGGAGGAGACCCTGTCCTATACCAGCAC
>gi|197256793|gb|FJ028273.1|_Sicalis_luteola_voucher_MACN-Or-ct_1554_cytochrome_oxidase_subunit_1_(COI)_gene_partial_cds_mitochondrial
CTGTACCTAATCTTTGGCGCATGAGCCGGGATAGTAGGTACTGCCCTAAGCCTCCTTATTCGAGCAGAACTGGGTCAACCCGGAGCCCTTCTAGGAGACGACCAGGTATACAACGTAGTCGTCACGGCCCATGCTTTCGTAATAATCTTCTTCATAGTTATGCCAATCATAATCGGAGGGTTTGGAAACTGACTTGTTCCCCTAATAATTGGAGCTCCAGATATAGCATTCCCACGAATAAACAACATAAGCTTCTGATTACTTCCCCCATCCTTCCTCCTTCTTCTAGCTTCCTCTACAGTTGAAGCAGGCGCCGGTACAGGTTGAACAGTATACCCCCCTCTAGCTGGTAATCTAGCCCACGCCGGAGCTTCTGTTGACCTCGCAATTTTCTCGCTCCACTTAGCCGGTATCTCATCAATTTTAGGGGCAATCAACTTCATCACAACAGCAATCAATATAAAACCCCCAGCCCTTTCACAATACCAAACCCNCCTATTCGTCTGATCAGTACTAATTACCGCAGTATTATTACTCCTATCCCTCCCAGTCCTTGCCGCAGGAATCACAATACTCCTTACAGACCGCAACCTTAACACCACATTCTTCGACCCCGCTGGAGGAGGAGACCCTGTCCTATACCAGCAC
>gi|197256789|gb|FJ028271.1|_Sicalis_flaveola_voucher_MACN-Or-ct_1443_cytochrome_oxidase_subunit_1_(COI)_gene_partial_cds_mitochondrial
CTGTACCTAATCTTTGGCGCATGAGCCGGAATAGTAGGTACTGCCCTAAGCCTCCTCATCCGAGCAGAACTAGGCCAACCCGGAGCCCTTCTAGGAGACGACCAAGTATACAATGTTGTCGTCACGGCCCATGCTTTCGTAATAATCTTCTTCATAGTTATACCAATTATAATCGGTGGATTTGGAAACTGACTCGTCCCCCTAATAATTGGAGCTCCAGACATAGCATTCCCACGAATAAATAACATAAGCTTCTGACTACTTCCCCCATCCTTCCTCCTTCTCCTAGCATCCTCCACAGTCGAAGCAGGCGCCGGCACTGGTTGAACAGTATATCCACCCCTAGCCGGTAACCTAGCCCATGCCGGAGCTTCTGTTGACCTCGCAATCTTCTCCCTACACTTAGCCGGTATCTCCTCAATTTTAGGGGCAATCAATTTCATTACAACAGCAATCAACATAAAACCCCCTGCCCTCTCACAATACCAAACCCCTCTATTCGTCTGATCAGTACTAATTACCGCAGTATTATTGCTTCTATCTCTCCCAGTTCTCGCCGCAGGAATTACAATACTACTTACAGACCGTAACCTTAATACTACATTTTTCGACCCTGCTGGGGGAGGAGACCCCGTCCTATATCAACAT
>gi|197256785|gb|FJ028269.1|_Sicalis_flaveola_voucher_MACN-Or-ct_345_cytochrome_oxidase_subunit_1_(COI)_gene_partial_cds_mitochondrial
CTGTACCTAATCTTTGGCGCATGAGCCGGAATAGTAGGTACTGCCCTAAGCCTCCTCATCCGAGCAGAACTAGGCCAACCCGGAGCCCTTCTAGGAGACGACCAAGTATACAATGTTGTCGTCACGGCCCATGCTTTCGTAATAATCTTCTTCATAGTTATACCAATTATAATCGGTGGATTTGGAAACTGACTCGTCCCCCTAATAATTGGAGCTCCAGACATAGCATTCCCACGAATAAATAACATAAGCTTCTGACTACTTCCCCCATCCTTCCTCCTTCTCCTAGCATCCTCCACAGTCGAAGCAGGCGCCGGCACTGGTTGAACAGTATACCCACCCCTAGCCGGTAACCTAGCCCATGCCGGAGCTTCTGTTGACCTCGCAATCTTCTCCCTACACTTAGCCGGTATCTCCTCAATTTTAGGGGCAATCAACTTCATTACAACAGCAATCAACATAAAACCCCCTGCCCTCTCACAATACCAAACCCCTCTATTCGTCTGATCAGTACTAATTACCGCAGTATTATTGCTTCTATCTCTCCCAGTTCTCGCCGCAGGAATTACAATACTACTTACAGACCGTAACCTTAATACTACATTTTTCGACCCTGCTGGGGGAGGAGACCCCGTCCTATATCAACAT
>gi|197256781|gb|FJ028267.1|_Sicalis_flaveola_voucher_MACN-Or-ct_3230_cytochrome_oxidase_subunit_1_(COI)_gene_partial_cds_mitochondrial
CTGTACNTAATCTTTGGCGCATGAGCCGGAATAGTAGGTACTGCCCTAAGCCTCCTCATCCGAGCAGAACTAGGCCAACCCGGAGCCCTTCTAGGAGACGACCAAGTATACAATGTTGTCGTCACGGCCCATGCTTTCGTAATAATCTTCTTCATAGTTATACCAATTATAATCGGTGGATTTGGAAACTGACTCGTCCCCCTAATAATTGGAGCTCCAGACATAGCATTCCCACGAATAAATAACATAAGCTTCTGACTACTTCCCCCATCCTTCCTCCTTCTCCTAGCATCCTCCACAGTCGAAGCAGGCGCCGGCACTGGTTGAACAGTATATCCACCCCTAGCCGGTAACCTAGCCCATGCCGGAGCTTCTGTTGACCTCGCAATCTTCTCCCTACACTTAGCCGGTATCTCCTCAATTTTAGGGGCAATCAATTTCATTACAACAGCAATCAACATAAAACCCCCTGCCCTCTCACAATACCAAACCCCTCTATTCGTCTGATCAGTACTAATTACCGCAGTATTATTGCTTCTATCTCTCCCAGTTCTCGCCGCAGGAATTACAATACTACTTACAGACCGTAACCTTAATACTACATTTTTCGACCCTGCTGGGGGAGGAGACCCCGTCCTATATCAACAT
>gi|197256777|gb|FJ028265.1|_Serpophaga_subcristata_voucher_MACN-Or-ct_2774_cytochrome_oxidase_subunit_1_(COI)_gene_partial_cds_mitochondrial
CTGTACTTAATTTTTGGTGCCTGGGCCGGTATAATTGGTACCGCCCTAAGTCTCCTCATTCGAGCAGAACTCGGACAGCCAGGGACTCTCCTAGGAGATGACCAAATTTACAATGTAATTGTCACTGCCCATGCCTTTGTAATAATCTTCTTTATAGTTATACCTATCATGATCGGAGGATTCGGTAACTGACTAGTCCCCATAATGATTGGTGCTCCAGACATAGCATTCCCACGCATAAATAACATAAGCTTCTGACTACTTCCTCCATCCTTCCTCCTTCTCTTAGCCTCATCCACAGTAGAAGCCGGAGGAGGAACTGGGTGAACTGTTTACCCACCATTGGCTGGAAATCTAGCCCATGCTGGTGCCTCAGTAGACCTAGCAATCTTTTCCCTCCACCTCGCAGGTGTATCCTCAATTCTAGGTGCTATCAACTTCATCACCACCGCAACCAATATAAAACCCCCAGCTCTTTCACAATACCAAACACCCTTATTCGTATGATCTGTCCTAATCACTGCAGTCTTACTACTTCTTTCCCTCCCAGTCCTCGCCGCTGGCATCACAATACTTCTAACAGATCGTAACCTTAATACTACATTCTTCGACCCTGCAGGAGGCGGAGATCCAGTCTTGTATCAACAT
>gi|197256773|gb|FJ028263.1|_Serpophaga_subcristata_voucher_MACN-Or-ct_026_cytochrome_oxidase_subunit_1_(COI)_gene_partial_cds_mitochondrial
CTGTACTTAATTTTTGGTGCCTGGGCCGGTATAATTGGTACCGCCCTAAGTCTCCTCATTCGAGCAGAACTCGGACAGCCAGGGACTCTCCTAGGAGATGACCAAATTTACAATGTAATTGTCACTGCCCATGCCTTTGTAATAATCTTCTTTATAGTTATACCTATCATGATCGGAGGATTCGGTAACTGACTAGTCCCCATAATGATTGGTGCTCCAGACATAGCATTCCCACGCATAAATAACATAAGCTTCTGACTACTTCCTCCATCCTTCCTCCTTCTCTTAGCCTCATCCACAGTAGAAGCCGGAGGAGGAACTGGGTGAACTGTTTACCCACCATTGGCTGGAAATCTAGCCCATGCTGGTGCCTCAGTAGACCTAGCAATCTTTTCCCTCCACCTCGCAGGTGTATCCTCAATTCTAGGTGCTATCAACTTCATCACCACCGCAACCAATATAAAACCCCCAGCTCTTTCACAATACCAAACACCCTTATTCGTATGATCTGTCCTAATCACTGCAGTCTTACTACTTCTTTCCCTCCCAGTCCTCGCCGCTGGCATCACAATACTTCTAACAGATCGTAACCTTAATACTACATTCTTCGACCCTGCAGGAGGTGGAGATCCAGTCTTGTATCAACAT
>gi|197256769|gb|FJ028261.1|_Serpophaga_subcristata_voucher_MACN-Or-ct_1780_cytochrome_oxidase_subunit_1_(COI)_gene_partial_cds_mitochondrial
CTGTACTTAATTTTTGACGCCTGGGTCGGTATAATTGGTACCGCCCTAAGCCTCCTCATCCGAGCAGAACTCGGACAGCCAGGAACTCTCCTAGGAGATGACCAAATTTACAATGTAATTGTCACTGCCCATGCTTTTGTAATAATCTTCTTTATAGTTATACCTATCATGATCGGAGGGTTCGGTAACTGACTAGTCCCCATAATGATTGGTGCTCCAGACATAGCATTCCCACGCATAAATAACATAAGCTTCTGACTACTTCCTCCATCATTCCTCCTTCTCTTAGCCTCATCCACAGTAGAAGCCGGAGTAGGAACTGGGTGAACTGTTTACCCACCATTGGCTGGAAATCTAGCCCATGCTGGTGCCTCAGTAGACCTAGCAATCTTTTCCCTCCACCTCGCAGGTGTATCCTCAATTCTAGGTGCTATCAACTTCATCACCACCGCAATCAATATAAAACCCCCAGCCCTTTCACAATACCAAACACCCTTATTCGTATGATCTGTCCTAATCACTGCAGTCTTACTACTTCTTTCCCTCCCAGTCCTTGCCGCTGGCATCACAATACTTCTAACAGATCGTAACCTTAATACTACATTCTTCGACCCTGCAGGAGGTGGAGATCCAGTCTTGTATCAACAT
>gi|197256765|gb|FJ028259.1|_Sephanoides_sephanoides_voucher_MACN-Or-ct_701_cytochrome_oxidase_subunit_1_(COI)_gene_partial_cds_mitochondrial
CTATATCTAATCTTTGGGGCCTGGGCCGGAATAGTTGGAACCGCCCTCAGCCTATTAATCCGCGCAGAATTGGGCCAACCAGGCACATTGCTAGGAGACGATCAGATCTACAACGTAATTGTCACCGCCCATGCCTTCGTAATAATTTTCTTCATAGTCATACCAATCATGATTGGGGGCTTTGGAAACTGACTAATCCCCCTCATAATTGGAGCCCCAGACATAGCATTCCCTCGCATAAACAACATGAGCTTCTGACTCCTACCGCCATCGTTCCTCCTACTTCTCGCCTCCTCCACCGTGGAGGCAGGCGCAGGCACAGGATGAACTGTCTACCCCCCCCTAGCCGGCAACCTAGCCCATGCCGGCGCATCAGTAGACTTGGCAATCTTTTCACTACACCTATCCGGAATCTCATCAATCCTGGGAGCAATCAATTTCATCACCACAGCAATCAACATAAAACCACCGGCACTCTCACAGTACCAAACCCCCCTATTTGTCTGATCCGTCCTCATCACCGCCGTCTTACTCCTCCTCTCACTCCCAGTGCTCGCCGCCGGAATCACCATACTACTTACAGACCGAAATCTAAACACCACATTCTTTGACCCCGCCGGAGGAGGCGACCCAATCCTATACCAGCAT
>gi|197256761|gb|FJ028257.1|_Scytalopus_superciliaris_voucher_MACN-Or-ct_729_cytochrome_oxidase_subunit_1_(COI)_gene_partial_cds_mitochondrial
CTTTATTTAATCTTTGGCGCATGAGCCGGTATAATTGGCACCGCCCTCAGCCTCTTAATTCGAGCAGAACTCGGACAACCCGGCACCCTACTAGGTGATGACCAAATCTATAATGTAATCGTCACTGCCCATGCTTTTGTAATAATTTTCTTTATAGTTATACCAATCATGATCGGAGGGTTTGGCAACTGACTAGTCCCACTAATAATTGGAGCCCCCGATATAGCATTCCCACGAATAAACAACATAAGCTTTTGATTACTACCACCATCATTCCTCCTCTTACTAGCATCTTCAACAGTAGAAGCTGGTGTAGGTACAGGATGAACAGTATATCCACCGCTAGCTGGCAATTTAGCTCACGCTGGAGCCTCAGTAGATCTAGCTATCTTCTCCCTTCACCTAGCAGGAATCTCCTCAATCCTAGGTGCAATTAATTTCATTACAACTGCACTAAATATAAAACCACCAGCTCTCTCACAATACCAGACACCACTATTTGTATGATCTGTCCTCATCACTGCAGTCCTACTACTCCTCTCTCTTCCAGTTCTCGCTGCTGGCATTACCATGTTATTAACAGACCGTAACCTAAACACCACATTCTTCGACCCTGCTGGAGGTGGAGACCCAATCCTATACCAACAC
>gi|197256757|gb|FJ028255.1|_Scytalopus_superciliaris_voucher_MACN-Or-ct_939_cytochrome_oxidase_subunit_1_(COI)_gene_partial_cds_mitochondrial
CTTTATTTAATCTTTGGCGCATGAGCCGGTATAATTGGCACCGCCCTCAGCCTCTTAATTCGAGCAGAACTCGGACAACCCGGCACCCTACTAGGTGATGACCAAATCTATAATGTAATCGTCACTGCCCATGCTTTTGTAATAATTTTCTTTATAGTTATACCAATTATGATCGGAGGGTTTGGCAACTGACTAGTCCCACTAATAATTGGAGCCCCCGATATAGCATTCCCACGAATAAACAACATAAGCTTTTGATTACTACCACCATCATTCCTCCTCTTACTAGCATCTTCAACAGTAGAAGCTGGTGTAGGTACAGGATGAACAGTATATCCACCGCTAGCTGGCAATTTAGCTCACGCTGGAGCCTCAGTAGATCTAGCTATCTTCTCCCTTCACCTAGCAGGAATCTCCTCAATCCTAGGTGCAATTAATTTCATTACAACTGCACTAAATATAAAACCACCAGCTCTCTCACAATACCAGACACCACTATTTGTATGATCTGTCCTCATCACTGCAGTCCTACTACTCCTCTCTCTTCCAGTTCTCGCTGCTGGCATTACCATGTTATTAACAGACCGTAACCTAAACACCACATTCTTCGACCCTGCTGGAGGTGGAGACCCAATCCTATACCAACAC
>gi|197256753|gb|FJ028253.1|_Scytalopus_magellanicus_voucher_MACN-Or-ct_2636_cytochrome_oxidase_subunit_1_(COI)_gene_partial_cds_mitochondrial
----------------------GAGCCGGCATAATTGGTACCGCCCTCAGCCTTTTAATTCGAGCAGAACTTGGACAACCAGGTACCCTACTAGGCGATGATCAAATTTATAATGTAATCGTTACCGCCCACGCCTTTGTAATAATTTTCTTTATAGTTATACCAATTATGATCGGAGGATTTGGCAACTGATTAGTCCCACTAATAATCGGAGCCCCCGACATAGCATTCCCACGAATAAACAACATAAGCTTTTGATTACTACCACCATCATTCCTGCTCTTACTAGCATCTTCAACAGTAGAAGCTGGCGTAGGTACAGGATGAACAGTCTACCCACCGTTAGCTGGTAACTTAGCCCATGCTGGCGCCTCAGTAGACCTAGCCATCTTCTCCCTTCACCTAGCAGGGGTCTCCTCAATTCTAGGCGCAATTAACTTCATTACAACTGCAATCAATATAAAACCGCCAGCTCTCTCACAATACCAGACGCCACTATTTGTCTGATCTGTCCTCATCACTGCAGTCCTACTGCTCCTCTCTCTCCCAGTTTTAGCTGCTGGTATTACCATGCTACTAACAGACCGTAATCTGAACACTACGTTCTTTGACCCCGCTGGAGGTGGAGACCCGATCTTATACCAACAC
>gi|197256749|gb|FJ028251.1|_Schoeniophylax_phryganophilus_voucher_MACN-Or-ct_3371_cytochrome_oxidase_subunit_1_(COI)_gene_partial_cds_mitochondrial
--------TATTTTCGGAGCATGAGCTGGCATAATTGGAACCGCCCTTAGCCTCCTAATCCGAGCTGAACTTGGTCAACCAGGAACCCTTCTAGGTGACGACCAAATCTACAACGTAATTGTCACCGCCCACGCCTTTGTAATAATCTTCTTTATAGTAATGCCAATTATGATCGGCGGCTTCGGTAACTGACTAGTACCATTAATAATTGGCGCCCCAGACATAGCCTTCCCCCGAATAAACAACATAAGCTTCTGACTCCTACCCCCATCCTTCCTACTTCTTCTAGCCTCTTCAACAGTAGAAGCAGGAGTAGGAACAGGATGAACAGTCTACCCACCATTAGCAGGTAACCTAGCCCACGCCGGCGCCTCAGTTGATCTAGCCATCTTCTCTCTTCACCTAGCCGGTGTATCCTCCATCCTAGGAGCCATCAACTTCATTACAACCGCCATTAACATAAAACCACCCACTCTCTCACAATACCAAACACCACTATTTGTCTGATCCGTTCTCATCACTGCCGTACTCCTTCTACTCTCACTCCCTGTCCTAGCTGCTGGCATCACAATACTACTAACAGACCGCAACCTAAACACCACATTCTTCGACCCAGCCGGAGGCGGAGACCCCGTCCTATATCAACAC
>gi|197256745|gb|FJ028249.1|_Schoeniophylax_phryganophilus_voucher_MACN-Or-ct_1477_cytochrome_oxidase_subunit_1_(COI)_gene_partial_cds_mitochondrial
CTTTACCTTATTTTCGGAGCATGAGCTGGCATAATTGGAACCGCCCTTAGCCTCCTAATCCGAGCTGAACTTGGTCAACCAGGAACCCTTCTAGGTGACGACCAAATCTACAACGTAATTGTCACCGCCCACGCCTTTGTAATAATCTTCTTTATAGTAATGCCAATTATGATCGGCGGCTTCGGTAACTGACTAGTACCATTAATAATTGGCGCCCCAGACATAGCCTTCCCCCGAATAAACAACATAAGCTTCTGACTCCTACCCCCATCCTTCCTACTTCTTCTAGCCTCTTCAACAGTAGAAGCAGGAGTAGGAACAGGATGAACAGTCTACCCACCATTAGCAGGTAACCTAGCCCACGCCGGCGCCTCAGTTGATCTAGCCATCTTCTCTCTTCACCTAGCCGGTGTATCCTCCATCCTAGGAGCCATCAACTTCATTACAACCGCCATTAACATAAAACCACCCACTCTCTCACAATACCAAACACCACTATTTGTCTGATCCGTTCTCATCACTGCCGTACTCCTTCTACTCTCACTCCCTGTCCTAGCTGCTGGCATCACAATACTACTAACAGACCGCAACCTAAACACCACATTCTTCGACCCAGCCGGAGGCGGAGACCCCGTCCTATATCAACAC
>gi|197256741|gb|FJ028247.1|_Schiffornis_virescens_voucher_MACN-Or-ct_1960_cytochrome_oxidase_subunit_1_(COI)_gene_partial_cds_mitochondrial
CTNTACCTAATCTTCGGCGCTTGAGCAGGCATAATCGGAACCGCCTTAAGCCTCCTCATCCGAGCAGAACTTGGTCAACCAGGCACCCTATTAGGAGATGACCAAATTTACAATGTAATCGTCACTGCCCATGCCTTCGTAATAATTTTCTTTATAGTTATACCCATTATAATCGGAGGATTCGGTAATTGACTAGTGCCTCTAATAATTGGCGCCCCCGACATAGCATTCCCCCGCATAAATAACATAAGCTTCTGACTTCTCCCTCCATCATTTATTCTTCTCCTAGCCTCTTCTACCGTAGAAGCTGGAGCAGGTACAGGATGAACCGTCTATCCCCCCTTAGCTGGTAATTTGGCCCACGCCGGACCCTCGGTAGATCTAGCCATCTTCTCCCTTCATCTAGCAGGTATTTCCTCTATCCTCGGGGCAATCAACTTCATTACCACTACTATTAATATAAAACCACCTGCTCTTTCACAATACCAAACACCTCTATTCGTCTGATCTGTCCTAATCACTGCTGTCCTTCTTCTCCTCTCTCTTCCAGTTCTTGCCGCCGGCATCACCATACTTTTAACAGACCGCAATCTAAACACTACATTCTTCGACCCTGCAGGAGGAGGCGACCCAATTCTATATCAACAT
>gi|197256737|gb|FJ028245.1|_Schiffornis_virescens_voucher_MACN-Or-ct_2967_cytochrome_oxidase_subunit_1_(COI)_gene_partial_cds_mitochondrial
CTCTACCTAATCTTCGGCGCTTGAGCAGGCATAATCGGAACCGCCTTAAGCCTCCTCATCCGAGCAGAACTTGGTCAACCAGGCACCCTATTAGGAGATGACCAAATTTACAATGTAATCGTCACTGCCCATGCCTTCGTAATAATTTTCTTTATAGTTATACCCATTATAATCGGAGGATTCGGTAATTGACTAGTGCCTCTAATAATTGGCGCCCCCGACATAGCATTCCCCCGCATAAATAACATAAGCTTCTGACTTCTCCCTCCATCATTTATTCTTCTCCTAGCCTCTTCTACCGTAGAAGCTGGAGCAGGTACAGGATGAACCGTCTATCCCCCCTTAGCTGGTAATTTGGCCCACGCCGGACCCTCGGTAGATCTAGCCATCTTCTCCCTTCATCTAGCAGGTATTTCCTCTATCCTCGGGGCAATCAACTTCATTACCACTACTATTAATATAAAACCACCTGCTCTTTCACAATACCAAACACCTCTATTCGTCTGATCTGTCCTAATCACTGCTGTCCTTCTTCTCCTCTCTCTTCCAGTTCTTGCCGCCGGCATCACCATACTTTTAACAGACCGCAATCTAAACACTACATTCTTCGACCCTGCAGGAGGAGGCGACCCAATTCTATATCAACAT
>gi|197256733|gb|FJ028243.1|_Scelorchilus_rubecula_voucher_MACN-Or-ct_2634_cytochrome_oxidase_subunit_1_(COI)_gene_partial_cds_mitochondrial
TTATACTTAATCTTTGGCGCATGGGCCGGTATAATCGGTACCGCCCTTAGCCTCCTAATCCGAGCTGAACTTGGCCAACCGGGTACCCTGATAGGTGATGACCAAATCTACAATGTAATCGTCACCGCCCATGCTTTCGTAATAATTTTCTTCATAGTTATACCGATTATAATCGGCGGATTTGGCAATTGACTAGTCCCATTAATAATCGGCGCCCCAGATATAGCATTCCCACGAATAAACAACATAAGCTTCTGACTTCTCCCCCCATCCTTTTTACTCCTCCTAGCATCCTCAACAGTAGAAGCCGGTGCAGGAACAGGATGAACAGTTTATCCCCCATTAGCAGGTAACCTAGCACATGCAGGAGCCTCAGTAGATCTAGCAATTTTCTCCCTTCACTTGGCAGGAGTATCATCTATTCTAGGAGCCATCAACTTCATCACAACTGCAATTAACATGAAACCACCGGCTCTCTCACAATATCAAACCCCACTATTTGTATGATCAGTCCTTATCACTGCTGTCCTTCTACTACTCTCCCTTCCAGTTCTAGCTGCAGGGATTACCATGTTACTAACAGACCGCAATCTAAACACTACATTCTTCGATCCGGCCGGAGGCGGAGACCCCGTTCTATACCAACAC
>gi|197256729|gb|FJ028241.1|_Satrapa_icterophrys_voucher_MACN-Or-ct_1679_cytochrome_oxidase_subunit_1_(COI)_gene_partial_cds_mitochondrial
CTATACCTAATTTTCGGCGCCTGAGCCGGAATGATTGGCACTGCCCTAAGCCTTCTTATTCGAGCAGAGCTAGGACAACCAGGGACTCTCCTAGGAGACGATCAGATCTATAATGTAATTGTCACTGCTCATGCTTTCGTAATAATCTTCTTTATAGTGATACCTATTATGATTGGAGGATTTGGCAACTGATTAGTTCCCTTAATAATTGGTGCCCCAGACATAGCATTCCCTCGTATAAACAACATAAGCTTCTGACTACTACCCCCATCATTTCTTCTCCTTTTAGCTTCATCTACAGTCGAAGCTGGAGCAGGAACCGGATGAACTGTTTACCCACCACTAGCCGGTAATATAGCACATGCCGGAGCTTCAGTAGACTTAGCCATCTTCTCCCTCCATCTCGCAGGTGTTTCTTCAATCCTAGGAGCTATCAACTTTATCACCACTGCAATTAACATAAAACCACCAGCCCTATCACAATACCAAACTCCCCTATTCGTATGATCTGTCCTAATCACTGCAGTTCTTCTTCTCCTCTCCCTCCCAGTCCTTGCTGCCGGCATCACTATATTACTTACAGATCGCAACCTTAACACTACATTCTTCGATCCCGCAGGAGGCGGAGATCCAGTCTTATATCAACAT
>gi|197256725|gb|FJ028239.1|_Satrapa_icterophrys_voucher_MACN-Or-ct_1158_cytochrome_oxidase_subunit_1_(COI)_gene_partial_cds_mitochondrial
CTATACCTAATTTTCGGCGCCTGAGCCGGAATGATTGGCACTGCCCTAAGCCTTCTTATTCGAGCAGAGCTAGGACAACCAGGGACTCTCCTAGGAGATGATCAGATCTATAATGTAATTGTCACTGCCCATGCTTTCGTAATAATCTTCTTTATAGTGATACCTATTATGATCGGAGGATTTGGCAACTGATTAGTTCCCTTAATAATTGGTGCCCCAGACATAGCATTCCCTCGTATAAACAACATAAGCTTCTGACTACTACCCCCATCATTTCTTCTCCTTTTAGCTTCATCTACAGTCGAAGCTGGAGCAGGAACCGGATGAACTGTTTACCCACCACTAGCCGGTAATATAGCACATGCCGGAGCTTCAGTAGACTTAGCCATCTTCTCCCTCCATCTCGCAGGTGTTTCTTCAATCCTAGGAGCTATCAACTTTATCACCACTGCAATTAACATAAAACCACCAGCCCTATCACAATACCAAACTCCCCTATTCGTATGATCCGTCCTAATCACTGCAGTTCTTCTTCTCCTCTCCCTCCCAGTCCTTGCTGCCGGCATCACTATATTGCTTACAGATCGCAACCTTAACACTACATTCTTCGATCCCGCAGGAGGCGGAGATCCAGTCTTATATCAACAT
>gi|197256721|gb|FJ028237.1|_Sarkidiornis_melanotos_voucher_MACN-Or-ct_1721_cytochrome_oxidase_subunit_1_(COI)_gene_partial_cds_mitochondrial
CTGTATCTTATCTTTGGAGCATGAGCTGGAATAATTGGCACAGCACTCAGCCTGCTAATCCGCGCAGAGCTAGGCCAACCAGGGACCCTCCTAGGCGATGACCAAATTTACAACGTAATCGTCACCGCCCACGCCTTTGTAATAATCTTCTTCATAGTAATACCCATCATAATTGGAGGATTTGGCAACTGATTAGTCCCCCTAATAATCGGCGCCCCCGACATAGCATTCCCACGAATAAACAACATAAGCTTCTGACTACTCCCGCCCTCATTCCTCCTACTACTCGCCTCATCCACCGTAGAAGCCGGCGCCGGCACAGGCTGAACCGTATACCCACCCCTAGCAGGCAACCTAGCCCATGCTGGAGCCTCAGTAGACCTGGCTATCTTCTCACTCCACTTAGCCGGCATCTCCTCCATCCTTGGGGCCATTAACTTTATCACCACAGCCATCAACATAAAACCCCCTGCGCTCTCACAATACCAAACCCCACTCTTCGTCTGATCCGTCCTAATCACCGCCATCCTGCTTCTCCTGTCACTACCTGTCCTCGCCGCCGGCATCACAATGCTACTAACCGACCGAAACCTAAACACCACATTCTTCGACCCAGCCGGAGGAGGGGACCCGATCCTGTACCAGCAC
>gi|197256717|gb|FJ028235.1|_Sappho_sparganura_voucher_MACN-Or-ct_792_cytochrome_oxidase_subunit_1_(COI)_gene_partial_cds_mitochondrial
CTGTACCTAATCTTCGGAGCATGAGCCGGAATAGTCGGAACTGCCCTTAGCCTATTAATTCGAGCAGAACTAGGCCAACCCGGTACTTTACTAGGAGACGACCAAATCTATAATGTTATTGTCACCGCCCATGCTTTCGTAATAATCTTCTTCATAGTCATGCCAATTATAATCGGAGGCTTTGGAAACTGACTAATCCCCCTTATAATTGGAGCCCCCGACATAGCATTCCCCCGCATAAACAACATAAGCTTCTGACTTCTACCCCCATCATTCCTCCTTCTCCTTGCCTCTTCCACCGTAGAAGCTGGCGCAGGTACAGGATGAACCGTTTACCCTCCCCTAGCCGGCAATTTAGCCCATGCAGGCGCATCAGTGGACCTGGCCATTTTCTCCCTACACCTGTCTGGCATTTCATCAATTCTAGGAGCAATCAACTTTATCACCACCGCAATCAACATAAAACCACCTGCCCTCTCACAATACCAAACCCCTCTATTTGTATGATCCGTTCTCATCACCGCTGTACTACTCCTCCTCTCACTCCCAGTACTAGCTGCCGGAATTACTATATTACTCACAGACCGAAACCTAAACACCACATTCTTTGACCCAGCCGGAGGAGGAGACCCCATCCTATACCAACAC
>gi|197256713|gb|FJ028233.1|_Saltator_similis_voucher_MACN-Or-ct_2397_cytochrome_oxidase_subunit_1_(COI)_gene_partial_cds_mitochondrial
CNGTACCTAATCTTCGGCGCATGAGCCGGAATAGTAGGCACAGCCCTAAGCCTCCTTATCCGAGCAGAACTAGGACAACCCGGAGCCCTCCTAGGTGACGACCAAGTGTACAACGTGGTCGTCACAGCTCACGCCTTCGTAATAATTTTCTTCATAGTTATACCAATTATGATTGGAGGGTTCGGAAACTGACTAGTCCCCCTAATAATCGGAGCCCCCGACATAGCATTCCCACGAATAAACAACATAAGCTTCTGACTCCTCCCACCATCCTTTCTTCTCCTCCTAGCGTCTTCTACAGTTGAAGCAGGTGCAGGCACAGGCTGAACAGTGTACCCCCCACTAGCCGGCAACCTAGCCCACGCCGGAGCTTCAGTCGACCTGGCAATCTTCTCCCTACACCTAGCCGGCATCTCCTCAATCCTGGGAGCAATCAACTTCATTACAACAGCAATCAACATAAAACCCCCTGCCCTTTCACAATACCAGACCCCCCTATTCGTCTGATCAGTCCTAATTACCGCAGTTCTACTACTCCTATCTCTCCCAGTACTAGCCGCAGGTATTACAATGCTCCTCACAGACCGCAACCTTAATACTACATTCTTCGACCCCGCTGGAGGAGGGGACCCTGTCCTATACCAGCAC
>gi|197256709|gb|FJ028231.1|_Saltator_similis_voucher_MACN-Or-ct_2895_cytochrome_oxidase_subunit_1_(COI)_gene_partial_cds_mitochondrial
CTGTACCTAATCTTCGGCGCATGAGCCGGAATAGTAGGCACAGCCCTAAGCCTCCTTATCCGAGCAGAACTAGGACAACCCGGAGCCCTCCTAGGTGACGACCAAGTGTACAACGTGGTCGTCACAGCTCACGCCTTCGTAATAATTTTCTTCATAGTTATACCAATTATGATTGGAGGGTTCGGAAACTGACTAGTCCCCCTAATAATCGGAGCCCCCGACATAGCATTCCCACGAATAAACAACATAAGCTTCTGACTCCTCCCACCATCCTTTCTTCTCCTCCTAGCGTCTTCTACAGTTGAAGCAGGTGCAGGCACAGGCTGAACAGTGTACCCCCCACTAGCCGGCAACCTAGCCCACGCCGGAGCTTCAGTCGACCTGGCAATCTTCTCCCTACACCTAGCCGGCATCTCCTCAATCCTGGGAGCAATCAACTTCATTACAACAGCAATCAACATAAAACCCCCTGCCCTTTCACAATACCAGACCCCCCTATTCGTCTGATCAGTCCTAATTACCGCAGTTCTACTACTCCTATCTCTCCCAGTACTAGCCGCAGGTATTACAATGCTCCTCACAGACCGCAACCTTAATACTACATTCTTCGACCCCGCTGGAGGAGGGGACCCTGTCCTATACCAGCAC
>gi|197256705|gb|FJ028229.1|_Saltator_coerulescens_voucher_MACN-Or-ct_1364_cytochrome_oxidase_subunit_1_(COI)_gene_partial_cds_mitochondrial
CTGTACCTAATCTTCGGCGCATGAGCCGGAATAGTAGGCACAGCCCTAAGCCTCCTTATCCGAGCAGAACTAGGACAACCTGGAGCTCTCCTAGGTGACGACCAAGTATACAACGTAGTCGTCACAGCTCATGCCTTCGTAATAATCTTCTTCATAGTTATACCAATTATGATCGGAGGGTTCGGAAACTGACTAGTCCCCCTAATAATCGGAGCCCCCGACATGGCATTCCCACGAATAAATAACATAAGCTTCTGACTCCTACCACCATCCTTCCTTCTCCTCCTAGCATCCTCCACAGTTGAAGCAGGTGCAGGCACAGGCTGAACAGTCTACCCCCCGCTAGCCGGAAACCTAGCCCACGCCGGAGCCTCAGTCGACCTGGCAATCTTCTCCCTACACCTAGCCGGCATCTCTTCAATCCTAGGAGCAATTAACTTTATTACAACAGCAATCAACATAAAACCCCCCGCTCTTTCACAATACCAAACCCCCCTGTTCGTCTGATCAGTATTAATCACCGCAGTTCTACTACTCCTATCTCTCCCAGTACTAGCCGCAGGAATTACAATGCTCCTCACGGACCGTAACCTTAACACCACATTCTTCGACCCAGCTGGGGGAGGAGACCCCGTCCTATACCAACAC
>gi|197256701|gb|FJ028227.1|_Saltator_coerulescens_voucher_MACN-Or-ct_3183_cytochrome_oxidase_subunit_1_(COI)_gene_partial_cds_mitochondrial
CTGTACNTAATCTTCGGCGCATGAGCCGGAATAGTAGGCACAGCCCTAAGCCTCCTTATCCGAGCAGAACTAGGACAACCTGGAGCTCTCCTAGGTGACGACCAAGTATACAACGTAGTCGTCACAGCTCATGCCTTCGTAATAATCTTCTTCATAGTTATACCAATTATGATCGGAGGGTTCGGAAACTGACTAGTCCCCCTAATAATCGGAGCCCCCGACATGGCATTCCCACGAATAAATAACATAAGCTTCTGACTCCTACCACCATCCTTCCTTCTCCTCCTAGCATCCTCCACAGTTGAAGCAGGTGCAGGCACAGGCTGAACAGTCTACCCCCCGCTAGCCGGAAACCTAGCCCACGCCGGAGCCTCAGTCGACCTGGCAATCTTCTCCCTACACCTAGCCGGCATCTCTTCAATCTTAGGAGCAATTAACTTTATTACAACAGCAATCAACATAAAACCCCCCGCTCTTTCACAATACCAAACCCCCCTGTTCGTCTGATCAGTATTAATCACCGCAGTTCTACTACTCCTATCTCTCCCAGTACTAGCCGCAGGAATTACAATGCTCCTCACGGACCGTAACCTTAACACCACATTCTTCGACCCAGCCGGGGGAGGAGACCCCGTCCTATACCAACAC
>gi|197256697|gb|FJ028225.1|_Saltator_aurantiirostris_voucher_MACN-Or-ct_2790_cytochrome_oxidase_subunit_1_(COI)_gene_partial_cds_mitochondrial
CTATACCTAATCTTCGGCGCATGAGCCGGAATAGTAGGTACGGCCCTAAGCCTCCTTATCCGAGCAGAACTAGGACAACCCGGAGCCCTCCTAGGAGACGACCAAGTATACAACGTAGTCGTCACAGCTCATGCCTTCGTAATAATCTTCTTCATAGTCATACCAATTATAATCGGAGGGTTCGGAAACTGACTGGTTCCTCTAATAATCGGAGCCCCCGACATAGCATTCCCACGAATAAACAACATAAGCTTTTGACTTCTCCCACCATCCTTTCTCCTCCTCCTAGCATCCTCCACAGTCGAAGCAGGCGCAGGCACAGGCTGAACAGTCTACCCCCCTCTAGCCGGCAACTTAGCCCACGCTGGGGCCTCAGTTGACCTGGCAATCTTCTCCCTGCATCTAGCCGGCATCTCCTCAATCCTAGGAGCAATTAACTTTATCACAACAGCAATTAACATAAAACCTCCCGCCCTCTCACAATACCAAACCCCCCTATTCGTTTGATCGGTCCTAATTACCGCAGTCTTACTACTCCTATCGCTCCCAGTACTAGCCGCAGGAATTACAATACTCCTCACAGACCGCAACCTCAACACCACATTCTTCGACCCTGCTGGGGGAGGAGACCCCGTCCTATACCAACAC
>gi|197256693|gb|FJ028223.1|_Saltator_aurantiirostris_voucher_MACN-Or-ct_1929_cytochrome_oxidase_subunit_1_(COI)_gene_partial_cds_mitochondrial
CTATACCTAATCTTCGGCGCATGAGCCGGAATAGTAGGTACAGCCCTAAGCCTCCTTATCCGAGCAGAACTAGGACAACCCGGAGCCCTCCTAGGAGACGACCAAGTATACAACGTAGTCGTCACAGCTCATGCCTTCGTAATAATCTTCTTCATAGTCATACCAATTATAATCGGAGGGTTCGGAAACTGACTGGTTCCTCTAATAATCGGAGCCCCCGACATAGCATTCCCACGAATAAACAACATAAGCTTTTGACTTCTCCCACCATCCTTTCTCCTCCTCCTAGCATCCTCCACAGTCGAAGCAGGCGCAGGCACAGGCTGAACAGTCTACCCCCCTCTAGCCGGCAACTTAGCCCACGCTGGGGCCTCAGTTGACCTGGCAATCTTCTCCCTGCATCTAGCCGGCATCTCCTCAATCCTAGGAGCAATTAACTTTATCACAACAGCAATTAACATAAAACCTCCCGCCCTCTCACAATACCAAACCCCCCTATTCGTTTGATCGGTCCTAATTACCGCAGTCCTACTACTCCTATCGCTCCCAGTACTAGCCGCAGGAATTACAATACTCCTCACAGACCGCAACCTCAACACCACATTCTTCGACCCTGCTGGGGGAGGAGACCCCGTCCTATACCAACAC
>gi|197256689|gb|FJ028221.1|_Saltator_aurantiirostris_voucher_MACN-Or-ct_1003_cytochrome_oxidase_subunit_1_(COI)_gene_partial_cds_mitochondrial
CTATACCTAATCTTCGGCGCATGAGCCGGAATAGTAGGTACAGCCCTAAGCCTCCTTATCCGAGCAGAACTAGGACAACCCGGAGCCCTCCTAGGAGACGACCAAGTATACAACGTAGTCGTCACAGCTCATGCCTTCGTAATAATCTTCTTCATAGTCATACCAATTATAATCGGAGGGTTCGGAAACTGACTGGTTCCTCTAATAATCGGAGCCCCCGACATAGCATTCCCACGAATAAACAACATAAGCTTTTGACTTCTCCCACCATCCTTTCTCCTCCTCCTAGCATCCTCCACAGTCGAAGCAGGCGCAGGCACAGGCTGAACAGTCTACCCCCCTCTAGCCGGCAACTTAGCCCACGCTGGGGCCTCAGTTGACCTGGCAATCTTCTCCCTGCATCTAGCCGGCATCTCCTCAATCCTAGGAGCAATTAACTTTATCACAACAGCAATTAACATAAAACCTCCCGCCCTCTCACAATACCAAACCCCCCTATTCGTTTGATCGGTCCTAATTACCGCAGTCTTACTACTCCTATCGCTCCCAGTACTAGCCGCAGGAATTACAATACTCCTCACAGACCGCAACCTCAACACCACATTCTTCGACCCTGCTGGGGGAGGAGACCCCGTCCTATACCAACAC
>gi|197256685|gb|FJ028219.1|_Saltator_aurantiirostris_voucher_MACN-Or-ct_2787_cytochrome_oxidase_subunit_1_(COI)_gene_partial_cds_mitochondrial
CTATACCTAATCTTCGGCGCATGAGCCGGAATAGTAGGTACGGCCCTAAGCCTCCTTATCCGAGCAGAACTAGGACAACCCGGAGCCCTCCTAGGAGACGACCAAGTATACAACGTAGTCGTCACAGCTCATGCCTTCGTAATAATCTTCTTCATAGTCATACCAATTATAATCGGAGGGTTCGGAAACTGACTGGTTCCTCTAATAATCGGAGCCCCCGACATAGCATTCCCACGAATAAACAACATAAGCTTTTGACTTCTCCCACCATCCTTTCTCCTCCTCCTAGCATCCTCCACAGTCGAAGCAGGCGCAGGCACAGGCTGAACAGTCTACCCCCCTCTAGCCGGCAACTTAGCCCACGCTGGGGCCTCAGTTGACCTGGCAATCTTCTCCCTGCATCTAGCCGGCATCTCCTCAATCCTAGGAGCAATTAACTTTATCACAACAGCAATTAACATAAAACCTCCCGCCCTCTCACAATACCAAACCCCCCTATTCGTTTGATCGGTCCTAATTACCGCAGTCTTACTACTCCTATCGCTCCCAGTACTAGCCGCAGGAATTACAATACTCCTCACAGACCGCAACCTCAACACCACATTCTTCGACCCTGCTGGGGGAGGAGACCCCGTCCTATACCAACAC
>gi|197256681|gb|FJ028217.1|_Rynchops_niger_voucher_MACN-Or-ct_2069_cytochrome_oxidase_subunit_1_(COI)_gene_partial_cds_mitochondrial
CTGTATCTAATTTTCGGTGCATGAGCTGGTATAGTGGGCACTGCTCTCAGCCTGCTTATCCGCGCAGAACTGGGTCAACCGGGAACCCTCCTAGGAGATGACCAAATCTACAATGTAATCGTTACCGCTCACGCCTTTGTAATGATCTTCTTCATAGTAATGCCAATTATAATTGGTGGCTTCGGAAATTGATTGGTCCCACTTATAATCGGCGCCCCCGATATAGCATTCCCTCGCATAAACAATATAAGCTTCTGACTACTCCCCCCATCCTTCCTACTCCTCCTGGCTTCCTCCACAGTAGAAGCCGGAGCAGGTACAGGATGAACCGTATATCCTCCCCTCGCCAGCAACTTAGCCCATGCCGGGGCTTCAGTAGACTTAGCAATCTTCTCCCTCCACCTAGCAGGTGTATCCTCCATCTTAGGTGCTATCAATTTCATCACTACAGCCATCAACATAAAACCTCCAGCCCTATCCCAATACCAAACCCCATTATTCGTATGATCTGTACTTATTACTGCCGTCTTACTACTACTTTCTCTCCCAGTGCTCGCTGCTGGTATCACTATGCTACTAACAGATCGAAACCTAAACACAACATTCTTCGACCCTGCTGGAGGCGGCGACCCAGTGCTATATCAACAT
>gi|197256677|gb|FJ028215.1|_Rostrhamus_sociabilis_voucher_MACN-Or-ct_1553_cytochrome_oxidase_subunit_1_(COI)_gene_partial_cds_mitochondrial
CTATACCTAATCTTCGGCGCCTGAGCCGGTATAGTCGGCACCGCCCTTAGCCTACTTATTCGCGCAGAACTCGGCCAACCAGGCACACTCCTAGGCGACGACCAAATTTACAACGTAATCGTCACTGCACATGCCTTCGTAATAATCTTCTTTATAGTTATACCCATCATGATCGGAGGCTTCGGAAATTGACTTGTCCCACTCATAATTGGTGCTCCTGACATAGCCTTTCCACGCATAAACAACATAAGCTTCTGACTACTTCCCCCCTCATTTCTCCTCCTACTAGCTTCCTCAACAGTAGAAGCAGGAGCTGGCACTGGATGAACTGTTTACCCCCCACTAGCTGGCAACATAGCCCACGCTGGAGCCTCAGTAGATCTAGCTATTTTCTCACTACACCTAGCTGGAGTTTCATCCATTCTAGGAGCAATTAACTTCATCACAACCGCCATCAACATAAAGCCTCCAGCCCTCTCCCAATACCAAACCCCCCTATTTGTATGATCCGTCCTAATCACCGCCGTTCTCCTACTACTCTCACTCCCAGTCCTAGCCGCTGGCATCACTATACTACTCACAGACCGAAACCTAAACACAACATTTTTCGACCCTGCCGGCGGGGGCGACCCCATCCTATACCAACAT
>gi|197256673|gb|FJ028213.1|_Rostratula_semicollaris_voucher_MACN-Or-ct_1545_cytochrome_oxidase_subunit_1_(COI)_gene_partial_cds_mitochondrial
TTATACCTAATCTTCGGCGCATGAGCAGGCATAGTCGGAACTGCCCTTAGCCTACTCATCCGCGCAGAACTAGGCCAACCAGGGACCTTACTAGGAGATGACCAAATTTACAACGTAATCGTCACCGCCCACGCATTTGTAATAATTTTCTTCATAGTAATACCAATCATAATTGGAGGCTTCGGAAACTGATTAGTTCCCCTCATAATTGGCGCTCCAGATATAGCATTCCCCCGCATGAACAACATAAGCTTTTGACTACTCCCACCATCATTCCTACTACTACTAGCATCCTCCACAGTAGAAGCAGGAGCAGGTACAGGATGAACTGTATACCCGCCACTCGCCGGTAACCTAGCCCATGCCGGAGCTTCAGTAGACCTAGCCATTTTTTCACTTCATCTAGCAGGTGTATCCTCTATCCTAGGTGCAATCAACTTCATCACAACCGCCACCAACATAAAACCACCAGCACTCTCCCAATACCAAACCCCTCTATTCGTATGATCCGTACTTATCACTGCTGTCCTACTGCTACTCTCCCTTCCAGTCCTTGCAGCTGGCATTACCATGCTACTAACAGATCGAAATTTAAATACTACCTTCTTTGATCCTGCTGGCGGAGGCGATCCTATTCTATATCAACAT
>gi|197256669|gb|FJ028211.1|_Rostratula_semicollaris_voucher_MACN-Or-ct_1517_cytochrome_oxidase_subunit_1_(COI)_gene_partial_cds_mitochondrial
TTATACCTAATCTTCGGCGCATGAGCAGGCATAGTCGGAACTGCCCTTAGCCTACTCATCCGCGCAGAACTAGGCCAACCAGGGACCTTACTAGGAGATGACCAAATTTACAACGTAATCGTCACCGCCCACGCATTTGTAATAATTTTCTTCATAGTAATACCAATCATAATTGGAGGCTTCGGAAACTGATTAGTTCCCCTCATAATTGGCGCTCCAGATATAGCATTCCCCCGCATGAACAACATAAGCTTCTGACTACTCCCACCATCATTCCTACTACTACTAGCATCCTCCACAGTAGAAGCAGGAGCAGGTACAGGATGAACTGTATACCCGCCACTCGCCGGTAACCTAGCCCATGCCGGAGCTTCAGTAGACCTAGCCATTTTTTCACTTCATCTAGCAGGTGTATCCTCTATCCTAGGTGCAATCAACTTCATCACAACCGCCACCAACATAAAACCACCAGCACTCTCCCAATACCAAACCCCTCTATTCGTATGATCCGTACTTATCACTGCTGTCCTACTGCTACTCTCCCTTCCAGTCCTTGCAGCTGGCATTACCATGCTACTAACAGATCGAAATTTAAATACTACCTTCTTTGATCCTGCTGGCGGAGGCGATCCTATTCTATATCAACAT
>gi|197256665|gb|FJ028209.1|_Rhynchotus_rufescens_voucher_MACN-Or-ct_2074_cytochrome_oxidase_subunit_1_(COI)_gene_partial_cds_mitochondrial
TTATACTTAATCTTTGGCGCATGAGCAGGCATAGTAGGAACCGCCCTTAGCTTACTTATCCGTGCTGAACTCGGTCAACCCGGTACTCTATTGGGTGACGACCAAATTTATAATGTTATTGTAACTGCCCATGCCTTCGTTATAATCTTCTTCATAGTCATACCCGTAATAATCGGAGGGTTTGGAAATTGACTTGTTCCTCTTATAATTGGAGCACCTGACATAGCATTCCCCCGAATAAACAACATAAGCTTTTGACTTCTCCCACCTTCATTCCTTCTCCTCTTAGCATCTTCTACAGTTGAAGCAGGAGTAGGTACTGGATGAACTGTTTATCCTCCACTAGCCGGTAACCTCGCCCATGCAGGTGCTTCCGTAGACCTAGCAATCTTCTCCCTCCACTTAGCTGGTGTTTCTTCTATCCTAGGAGCAATTAACTTCATTACCACAGCAATTAACATAAAACCACCTGCCCTATCACAATACCAAACCCCATTATTCGTATGATCCGTACTAATCACCGCTATCCTACTCCTTTTATCTCTTCCTGTCCTTGCTGCCGGAATTACAATACTCCTTACTGACCGAAACCTTAACACTACATTCTTTGATCCTGCTGGAGGAGGAGATCCTATCCTCTATCAACAT
>gi|197256661|gb|FJ028207.1|_Rhynchotus_rufescens_voucher_MACN-Or-ct_2062_cytochrome_oxidase_subunit_1_(COI)_gene_partial_cds_mitochondrial
TNATACTTAATCTTTGGCGCATGAGCAGGCATAGTAGGAACCGCCCTTAGCTTACTTATCCGTGCTGAACTCGGTCAACCCGGTACTCTATTGGGTGACGACCAAATTTATAATGTTATTGTAACTGCCCATGCCTTCGTTATAATCTTCTTCATAGTCATGCCCGTAATAATCGGAGGGTTTGGAAATTGACTTGTTCCTCTTATAATTGGAGCACCTGACATAGCATTCCCCCGAATAAACAACATAAGCTTTTGACTTCTCCCACCTTCATTCCTTCTCCTCTTAGCATCTTCTACAGTTGAAGCAGGAGTAGGTACTGGATGAACTGTTTACCCTCCACTAGCCGGTAACCTCGCCCATGCAGGTGCTTCCGTAGACCTAGCAATCTTCTCCCTCCACTTAGCTGGTGTTTCTTCTATCCTAGGAGCAATTAACTTCATTACCACAGCAATTAACATAAAACCACCTGCCCTATCACAATACCAAACCCCATTATTCGTATGATCCGTACTAATCACCGCTATCCTACTCCTTTTATCTCTTCCTGTCCTTGCTGCCGGAATTACAATACTCCTTACTGACCGAAACCTTAACACTACATTCTTTGATCCTGCTGGAGGAGGAGATCCTATCCTCTATCAACAT
>gi|197256657|gb|FJ028205.1|_Recurvirostra_andina_voucher_MACN-Or-ct_1297_cytochrome_oxidase_subunit_1_(COI)_gene_partial_cds_mitochondrial
CTATACCTAATCTTCGGTGCATGAGCTGGTATAGTTGGTACCGCCCTTAGCTTACTCATCCGAGCAGAATTAGGCCAACCAGGGACCCTACTAGGAGATGACCAAATCTACAATGTAATCGTCACTGCCCACGCCTTCGTAATAATTTTCTTCATAGTTATACCAATTATGATTGGCGGATTCGGAAACTGACTAGTACCACTCATAATTGGTGCCCCCGACATAGCATTCCCCCGCATAAACAACATAAGCTTCTGACTACTACCACCGTCATTCCTACTTCTCCTCGCCTCCTCTACAGTAGAAGCAGGAGCAGGAACAGGCTGGACTGTATACCCCCCCTTAGCTGGTAACTTAGCCCATGCCGGAGCTTCAGTAGACCTAGCCATCTTCTCCCTCCACCTGGCAGGTGTATCCTCTATCCTAGGTGCAATCAACTTCATTACAACTGCTATCAACATAAAACCACCTGCCCTCTCACAATACCAAACCCCCCTATTCGTATGATCCGTCCTCATCACCGCCGTCTTACTACTCCTCTCACTCCCAGTTCTAGCCGCCGGCATTACTATACTACTAACAGACCGAAACCTAAATACCACATTCTTTGACCCTGCCGGAGGAGGTGATCCAGTCCTATATCAACAC
>gi|197256653|gb|FJ028203.1|_Recurvirostra_andina_voucher_MACN-Or-ct_864_cytochrome_oxidase_subunit_1_(COI)_gene_partial_cds_mitochondrial
CTATACCTAATCTTCGGTGCATGAGCTGGTATAGTTGGTACCGCCCTTAGCTTACTCATCCGAGCAGAATTAGGCCAACCAGGGACCCTACTAGGAGATGACCAAATCTACAATGTAATCGTCACTGCCCACGCCTTCGTAATAATTTTCTTCATAGTTATACCAATTATGATTGGCGGATTCGGAAACTGACTAGTACCACTCATAATTGGTGCCCCCGACATAGCATTCCCCCGCATAAACAACATAAGCTTCTGACTACTACCACCGTCATTCCTACTTCTCCTCGCCTCCTCTACAGTAGAAGCAGGAGCAGGAACAGGCTGGACTGTATACCCCCCCTTAGCTGGTAACTTAGCCCATGCCGGAGCTTCAGTAGACCTAGCCATCTTCTCCCTCCACCTGGCAGGTGTATCCTCTATCCTAGGTGCAATCAACTTCATTACAACTGCTATCAACATAAAACCACCTGCCCTCTCACAATACCAAACCCCCCTATTCGTATGATCCGTCCTCATCACCGCCGTCTTACTACTCCTCTCACTCCCAGTTCTAGCCGCCGGCATTACTATACTACTAACAGACCGAAACCTAAATACCACATTCTTTGACCCTGCCGGAGGAGGTGATCCAGTCCTATATCAACAC
>gi|197256649|gb|FJ028201.1|_Ramphastos_toco_voucher_MACN-Or-ct_3049_cytochrome_oxidase_subunit_1_(COI)_gene_partial_cds_mitochondrial
CTNTACCTCATTTTCGGCGCATGAGCAGGCATGATCGGCACAGCCTTAAGTCTCCTCATCCGAGCAGAACTTGGTCAACCAGGGACCCTCCTGGGCGACGACCAAATCTATAACGTAATCGTTACCGCCCACGCATTCGTAATAATCTTCTTCATGGTCATACCCATCATAATCGGAGGCTTTGGTAACTGACTTGTTCCCTTGATAATTGGAGCCCCAGACATGGCCTTCCCGCGCATGAACAACATAAGCTTCTGACTCCTCCCCCCATCATTCCTCCTACTCCTTGCATCCTCCACAGTCGAAGCTGGAGCCGGAACCGGATGAACTGTCTACCCCCCTCTAGCCGGTAACCTAGCCCACGCTGGGGCCTCAGTTGACCTAGCCATCTTCTCCTTACACCTAGCAGGGGTTTCATCCATCCTCGGTGCAATCAACTTCATCACTACCGCTATCAACATAAAACCACCAGCCATCTCACAATACCAAACACCCCTATTTGTCTGATCCGTACTCATCACTGCCGTCTTACTCCTACTATCCCTCCCCGTCCTTGCCGCAGGCATCACCATACTCCTCACCGACCGCAATCTAAACACCACATTCTTCGACCCAGCTGGAGGAGGCGACCCAGTCCTATACCAACAC
>gi|197256645|gb|FJ028199.1|_Pyrrhura_molinae_voucher_MACN-Or-ct_1117_cytochrome_oxidase_subunit_1_(COI)_gene_partial_cds_mitochondrial
CTTTACCTAATCTTTGGCGCATGAGCGGGCATAATCGGTACCGCCCTAAGCCTACTTATCCGCGCAGAACTAGGCCAACCCGGGACCCTCTTAGGAGACGACCAGATCTATAATGTAATTGTCACAGCCCATGCCTTCGTAATAATCTTCTTCATAGTAATGCCAATCATGATCGGGGGGTTTGGAAACTGACTAGTTCCCCTCATAATCGGTGCCCCCGACATGGCATTCCCACGCATAAACAACATAAGCTTCTGGTTACTCCCCCCATCCTTCCTCCTCCTACTAGCCTCCTCTACAGTAGAGGCAGGCGCCGGTACAGGATGAACAGTCTATCCCCCCCTGGCCGGAAACCTAGCCCACGCCGGGGCATCAGTAGACCTGGCCATCTTCTCCCTTCACCTAGCAGGAGTATCCTCCATCCTAGGTGCAATCAACTTTATCACCACAGCCATCAACATAAAACCACCCGCACTATCACAATATCAAACCCCATTATTCGTCTGATCCGTCCTAATCACAGCAGTACTACTCCTGCTATCTCTCCCAGTCTTAGCTGCCGGAATCACCATACTCCTTACAGACCGCAACCTAAACACCACATTCTTTGACCCTGCCGGAGGGGGAGACCCAATCTTATACCAACAC
>gi|197256641|gb|FJ028197.1|_Pyrrhomyias_cinnamomeus_voucher_MACN-Or-ct_748_cytochrome_oxidase_subunit_1_(COI)_gene_partial_cds_mitochondrial
CTATACATAATTTTCGGTGCCTGAGCCGGCATAATTGGCACCGCCCTAAGTCTCCTCATCCGGGCAGAACTAGGCCAACCAGGAACTCTCCTGGGAGATGACCAAATCTACAATGTAATCGTAACTGCCCACGCTTTCGTAATAATTTTCTTCATGGTTATACCTATTATAATCGGGGGGTTTGGAAACTGACTAGTCCCCCTGATAATCGGTGCCCCAGATATAGCCTTCCCACGAATAAACAACATGAGTTTCTGACTTCTACCTCCATCGTTCCTCCTCCTCCTTGCTTCATCTACAGTAGAAGCCGGGGTAGGAACAGGATGAACCGTTTATCCACCATTAGCAGGCAACCTAGCACATGCCGGAGCTTCCGTAGACCTAGCTATCTTCTCTCTTCATCTTGCAGGTGTCTCCTCTATCTTAGGGGCCATCAACTTCATTACTACCGCAATCAACATAAAACCACCAGCCCTATCCCAATACCAAACCCCCCTATTCGTATGATCCGTCCTAATTACTGCAGTCCTACTACTCCTATCCCTCCCAGTTCTTGCCGCTGGCATCACAATACTTCTAACAGACCGTAACCTAAACACCACATTCTTCGACCCCGCAGGAGGTGGAGACCCAGTCCTATACCAACAC
>gi|197256637|gb|FJ028195.1|_Pyrrhocoma_ruficeps_voucher_MACN-Or-ct_1976_cytochrome_oxidase_subunit_1_(COI)_gene_partial_cds_mitochondrial
CTGTACCTAATCTTCGGTGCATGAGCCGGGATAGTAGGTACTGCCCTAAGCCTTCTCATTCGAGCAGAGCTAGGCCAACCTGGAGCCCTTCTAGGAGACGACCAAGTCTACAACGTAATCGTCACAGCCCATGCTTTCGTAATAATTTTCTTCATAGTTATACCAATTATAATCGGAGGCTTCGGAAACTGACTAGTCCCCCTAATAATTGGAGCCCCGGATATGGCATTCCCACGAATAAACAACATAAGCTTCTGACTACTACCCCCATCTTTCCTACTACTCCTAGCATCTTCTACAGTTGAAGCAGGCGTTGGTACAGGCTGAACGGTTTATCCCCCATTAGCCGGTAACCTAGCCCACGCCGGAGCCTCAGTCGACCTTGCAATCTTCTCCTTACACTTAGCTGGTATCTCTTCAATCCTGGGAGCAATCAACTTCATCACAACAGCCATCAACATAAAACCCCCTGCCCTCTCACAATACCAAACCCCCCTATTCGTCTGATCAGTACTAATTACTGCAGTATTACTGCTTCTATCCCTCCCAGTCCTCGCTGCAGGAATCACAATGCTTCTCACAGACCGCAACCTTAACACCACATTCTTCGACCCCGCAGGAGGAGGTGACCCTGTTCTATACCAACAC
>gi|197256633|gb|FJ028193.1|_Pyrocephalus_rubinus_voucher_MACN-Or-ct_1390_cytochrome_oxidase_subunit_1_(COI)_gene_partial_cds_mitochondrial
TTATACCTAATCTTTGGCGCTTGAGCTGGCATAATTGGTACCGCCCTAAGCCTCCTTATCCGAGCAGAATTAGGACAACCAGGGACTCTCCTAGGGGATGACCAAATCTATAATGTAATCGTCACTGCTCATGCCTTTGTAATAATCTTCTTTATAGTAATGCCCATTATAATCGGAGGATTCGGCAATTGATTAGTTCCCTTAATAATTGGTGCCCCCGACATAGCATTCCCCCGCATAAACAATATAAGTTTCTGACTATTGCCCCCATCATTCCTTCTTCTTCTAGCCTCATCCACAGTCGAAGCCGGAGCCGGAACGGGATGAACTGTCTATCCTCCATTAGCTGGAAACCTAGCACATGCTGGAGCTTCCGTAGACTTAGCCATTTTCTCCCTTCACCTTGCAGGTGTTTCTTCAATCTTAGGTGCCATCAATTTTATTACTACCGCAATTAATATAAAACCACCCGCTCTATCACAATACCAAACTCCCCTCTTTGTGTGATCCGTTCTAATCACCGCAGTCCTTCTCCTCCTTTCTCTACCAGTCCTTGCCGCAGGTATCACCATGCTATTAACAGATCGCAACCTTAACACTACATTTTTCGACCCCGCAGGAGGAGGAGACCCAATCTTATACCAACAT
>gi|197256629|gb|FJ028191.1|_Pyrocephalus_rubinus_voucher_MACN-Or-ct_1775_cytochrome_oxidase_subunit_1_(COI)_gene_partial_cds_mitochondrial
TTATACCTAATCTTTGGCGCTTGAGCTGGCATAATTGGTACCGCCCTAAGCCTCCTTATCCGAGCAGAATTAGGACAACCAGGGACTCTCCTAGGGGATGACCAAATCTATAATGTAATCGTCACTGCTCATGCCTTTGTAATAATCTTCTTTATAGTAATGCCCATTATAATCGGAGGATTCGGCAATTGATTAGTTCCCTTAATAATTGGTGCCCCCGACATAGCATTCCCCCGCATGAACAATATAAGTTTCTGACTATTGCCCCCATCATTCCTTCTTCTTCTAGCCTCATCCACAGTCGAAGCCGGAGCCGGAACGGGATGAACTGTCTATCCTCCATTAGCTGGAAACCTAGCACATGCTGGAGCTTCCGTAGACTTAGCCATTTTCTCCCTTCACCTTGCAGGTGTTTCTTCAATCTTAGGTGCCATCAATTTTATTACTACCGCAATTAATATAAAACCACCCGCTCTATCACAATACCAAACTCCCCTCTTTGTGTGATCCGTTCTAATCACCGCAGTCCTTCTCCTCCTTTCTCTACCAGTCCTTGCCGCAGGTATCACCATGCTATTAACAGATCGCAACCTTAACACTACATTTTTCGATCCCGCAGGAGGAGGAGACCCAATCTTATACCAACAT
>gi|197256625|gb|FJ028189.1|_Pyrocephalus_rubinus_voucher_MACN-Or-ct_037_cytochrome_oxidase_subunit_1_(COI)_gene_partial_cds_mitochondrial
TTATACCTAATCTTTGGCGCNTGAGCTGGCATAATTGGTACCGCCCTAAGCCTCCTTATCCGAGCAGAATTAGGACAACCAGGGACTCTCCTAGGGGATGACCAAATCTACAATGTAATCGTCACTGCTCATGCTTTTGTAATAATCTTCTTTATAGTAATGCCCATTATAATCGGAGGATTCGGCAATTGATTAGTTCCCTTAATAATTGGTGCCCCCGACATAGCATTCCCCCGCATGAACAATATAAGTTTCTGACTATTGCCCCCATCATTCCTTCTTCTTCTAGCCTCATCCACAGTCGAAGCCGGAGCCGGAACGGGATGAACTGTCTATCCTCCATTAGCTGGAAACCTAGCACATGCTGGAGCTTCCGTAGACTTAGCCATTTTCTCCCTTCACCTTGCAGGTGTTTCTTCAATCTTAGGAGCCATCAATTTTATTACTACCGCAATTAATATAAAACCACCCGCTCTATCACAATACCAAACTCCCCTCTTTGTGTGATCCGTTCTAATCACCGCAGTCCTTCTCCTCCTTTCTCTACCAGTCCTTGCCGCAGGTATCACCATGCTATTAACAGATCGCAACCTTAACACTACATTTTTCGACCCCGCGGGAGGAGGAGATCCAATCTTATACCAACAT
>gi|197256621|gb|FJ028187.1|_Pyriglena_leucoptera_voucher_MACN-Or-ct_1959_cytochrome_oxidase_subunit_1_(COI)_gene_partial_cds_mitochondrial
----------------GCGCATGAGCCGGAATGATCGGAACTGCCCTTAGCCTCCTAATCCGAGCCGAACTAGGACAACCAGGAACTCTACTAGGAGACGACCAAATTTATAATGTAATTGTCACCGCACACGCATTCGTCATAATCTTCTTCATAGTTATACCTATCATAATCGGTGGGTTTGGGAACTGACTAGTTCCCCTAATAATCGGAGCCCCTGATATAGCATTTCCACGAATAAATAATATAAGCTTTTGACTCCTTCCCCCTTCTTTCCTACTTCTTCTTGCCTCCTCAACAGTAGAAGCAGGGGTAGGAACAGGATGAACAGTATACCCGCCTCTAGCTGGCAACCTAGCCCATGCCGGAGCTTCCGTAGACCTAGCCATCTTCTCCCTTCACCTAGCAGGTGTCTCCTCTATTTTAGGAGCAATTAATTTTATCACAACCGCAATCAACATGAAACCCCCAACATTATCACAATATCAAACACCCTTATTCGTCTGGTCTGTCCTTATTACCGCTGTATTACTGCTTTTATCACTCCCAGTCCTTGCCGCTGGCATCACAATGCTGCTAACAGATCGTAACCTAAATACAACATTCTTTGACCCAGCTGGAGGTGGAGATCCAGTTCTGTACCAACAC
>gi|197256617|gb|FJ028185.1|_Pygoscelis_papua_voucher_MACN-Or-ct_386_cytochrome_oxidase_subunit_1_(COI)_gene_partial_cds_mitochondrial
CTCTACCTAATCTTTGGCGCATGAGCGGGCATAGCCGGAACCGCTCTCAGCCTACTCATTCGCGCAGAGCTTGGCCAGCCCGGAACTCTCCTAGGAGATGACCAAATTTACAACGTAATCGTCACTGCCCACGCCTTCGTAATAATCTTCTTCATAGTAATACCCATTATGATCGGAGGATTCGGAAACTGACTAGTACCACTTATAATTGGTGCCCCCGATATAGCATTCCCCCGTATAAACAACATAAGCTTCTGACTACTACCCCCATCCTTCCTACTCCTACTAGCCTCATCCACAGTAGAAGCAGGAGCTGGCACAGGATGAACTGTGTACCCACCACTAGCAGGTAATCTAGCCCATGCCGGTGCTTCAGTAGATCTAGCTATCTTCTCCCTCCACCTAGCAGGGGTCTCTTCCATCCTAGGAGCCATCAACTTTATCACCACCGCCATCAACATAAAACCCCCAGCCCTCTCACAATACCAAACTCCCCTATTTGTGTGATCCGTCCTTATCACAGCTGTCCTCCTACTACTATCGCTCCCTGTACTCGCTGCTGGCATCACCATACTACTAACCGACCGAAACCTAAACACCACCTTTTTTGACCCTGCCGGAGGAGGAGACCCAGTCCTATACCAACAC
>gi|197256613|gb|FJ028183.1|_Pygarrhichas_albogularis_voucher_MACN-Or-ct_3025_cytochrome_oxidase_subunit_1_(COI)_gene_partial_cds_mitochondrial
CTTTACCTAATTTTTGGAGCATGAGCCGGCATGATTGGAACCGCTCTCAGCCTTCTAATCCGAGCCGAACTTGGACAACCAGGCACCCTCCTAGGCGACGACCAAATCTACAACGTAATTGTTACCGCCCATGCCTTTGTAATAATCTTCTTTATAGTTATACCTATCATAATCGGGGGCTTTGGGAATTGACTAGTTCCATTAATAATTGGTGCCCCCGACATAGCATTTCCCCGAATAAACAACATAAGCTTCTGACTTCTACCCCCGTCATTCCTTTTACTTCTAGCCTCTTCCACAGTAGAAGCTGGAGTAGGAACAGGATGAACAGTTTATCCTCCATTAGCAGGCAACCTAGCCCATGCCGGAGCTTCAGTAGACCTAGCTATCTTCTCCCTCCACCTAGCTGGTGTGTCCTCTATCCTAGGGGCTATCAACTTCATTACAACCGCAATCAACATAAAACCACCTGCCCTTTCACAATACCAAACCCCATTATTCGTCTGATCAGTCCTCATTACTGCCGTATTACTTCTACTCTCCCTCCCTGTCCTAGCTGCCGGTATTACAATACTCCTTACAGATCGTAATCTAAACACCACATTTTTTGACCCAGCCGGAGGCGGAGATCCTGTCCTATACCAACAC
>gi|197256609|gb|FJ028181.1|_Pygarrhichas_albogularis_voucher_MACN-Or-ct_616_cytochrome_oxidase_subunit_1_(COI)_gene_partial_cds_mitochondrial
CTTTACCTAATTTTTGGAGCATGAGCCGGCATGATTGGAACCGCTCTCAGCCTTCTAATCCGAGCCGAACTTGGACAACCAGGCACCCTCCTAGGCGACGACCAAATCTACAACGTAATTGTTACCGCCCATGCCTTTGTAATAATCTTCTTTATAGTTATACCTATCATAATCGGGGGCTTTGGGAATTGACTAGTTCCATTAATAATTGGTGCCCCCGACATAGCATTTCCCCGAATAAACAACATAAGCTTCTGACTTCTACCCCCGTCATTCCTTTTACTTCTAGCCTCTTCCACAGTAGAAGCTGGAGTAGGAACAGGATGAACAGTTTATCCTCCATTAGCAGGCAACCTAGCCCATGCCGGAGCTTCAGTAGACCTAGCTATCTTCTCCCTCCACCTAGCTGGTGTGTCCTCTATCCTAGGGGCTATCAACTTCATTACAACCGCAATCAACATAAAACCACCTGCCCTTTCACAATACCAAACCCCATTATTCGTCTGATCAGTCCTCATTACTGCCGTATTACTCCTACTCTCCCTCCCTGTCCTAGCTGCCGGTATTACAATACTCCTTACAGATCGTAATCTAAACACCACATTTTTTGACCCAGCCGGAGGCGGAGATCCTGTCCTATACCAACAC
>gi|197256605|gb|FJ028179.1|_Pteroptochos_tarnii_voucher_MACN-Or-ct_2629_cytochrome_oxidase_subunit_1_(COI)_gene_partial_cds_mitochondrial
CTATATTTAATCTTTGGTGCATGAGCCGGCATAGTTGGTACCGCCCTTAGCCTCCTAATCCGAGCTGAACTTGGACAACCAGGTACCCTAATGGGTGACGACCAAATCTACAATGTAATCGTCACCGCCCATGCTTTCGTAATAATTTTCTTTATAGTCATACCGATTATAATTGGAGGATTTGGAAATTGACTAGTCCCACTAATAATCGGCGCCCCAGATATAGCATTCCCACGAATAAACAATATAAGCTTCTGACTACTCCCCCCATCCTTCTTACTCCTCCTGGCATCTTCTACGGTAGAAGCCGGCGCAGGAACAGGATGGACAGTCTACCCTCCACTAGCAGGCAACCTAGCACACGCAGGAGCCTCAGTAGACCTGGCAATTTTTTCTCTCCACTTAGCAGGAGTATCATCCATCCTAGGGGCCATCAACTTCATTACAACTGCAATCAACATAAAACCACCAGCCCTTACACAATACCAAACCCCACTATTCGTGTGATCAGTCCTTATTACCGCAGTGCTTCTACTACTTTCCCTACCAGTCCTAGCTGCAGGTATTACCATACTACTAACGGACCGCAATCTAAATACTACATTCTTTGACCCGGCTGGAGGAGGAGACCCCGTCCTATATCAACAC
>gi|197256601|gb|FJ028177.1|_Pteroglossus_castanotis_voucher_MACN-Or-ct_2892_cytochrome_oxidase_subunit_1_(COI)_gene_partial_cds_mitochondrial
CTTTACCTAATCTTCGGCGCATGAGCAGGCATAGTAGGCACAGCCCTAAGCCTCCTCATCCGAGCAGAGCTGGGCCAACCCGGAACCCTGCTAGGAGACGACCAAATCTACAATGTAATTGTCACCGCCCACGCATTCGTAATAATCTTCTTCATAGTCATACCTATTATAATCGGAGGTTTTGGCAACTGACTCGTTCCCCTAATAATCGGAGCCCCAGATATAGCCTTCCCCCGCATAAACAACATAAGCTTCTGACTCCTCCCCCCATCATTCCTCCTCCTTCTAGCATCATCTACGGTCGAAGCCGGAGCCGGAACTGGATGAACCGTCTACCCCCCTCTAGCTGGCAACCTCGCCCACGCCGGAGCCTCAGTTGACCTAGCCATCTTCTCCCTCCACCTAGCAGGAGTATCATCCATCCTAGGTGCCATCAACTTCATCACTACTGCCATCAACATAAAACCACCAGCCATCTCACAATACCAAACCCCACTATTCGTGTGATCAGTTCTCATCACCGCCGTCCTACTCCTTCTATCCCTCCCCGTCCTCGCCGCAGGTATTACTATACTCCTCACCGACCGCAATCTAAACACCACATTCTTTGACCCAGCTGGGGGCGGCGACCCAATTCTATACCAACAC
>gi|197256597|gb|FJ028175.1|_Bolborhynchus_aymara_voucher_MACN-Or-ct_1019_cytochrome_oxidase_subunit_1_(COI)_gene_partial_cds_mitochondrial
CTTTACCTAATCTTCGGCGCATGAGCAGGCATAATCGGCACCGCCCTAAGCCTACTCATCCGCGCAGAGCTCGGCCAACCTGGAACCCTCCTAGGAGACGACCAAATCTACAACGTAATCGTCACCGCCCACGCCTTTGTAATAATCTTCTTTATAGTAATACCAATCATAATCGGGGGATTCGGAAATTGATTAGTCCCCCTCATAATCGGCGCCCCCGACATAGCATTCCCACGCATAAACAACATAAGCTTCTGACTTCTCCCACCATCCTTCCTCCTCCTCCTAGCCTCCTCCACAGTCGAAGCAGGAGCAGGCACAGGATGGACAGTCTACCCACCCCTAGCAGGAAACCTAGCCCATGCAGGAGCTTCAGTAGACCTAGCCATCTTCTCCCTCCACCTAGCAGGTGTATCCTCCATCCTAGGAGCAATCAACTTCATCACAACAGCTATCAACATGAAACCCCCTTCCCTGTCACAATACCAAACCCCACTATTCGTTTGATCCGTATTAATCACAGCCGTACTACTCCTTCTATCCCTACCAGTCCTAGCCGCCGGAATCACAATACTCCTCACAGACCGCAACCTGAACACTACATTCTTCGACCCTGCAGGAGGAGGAGACCCAATCCTATACCAACAC
>gi|197256593|gb|FJ028173.1|_Psilopsiagon_aurifrons_voucher_MACN-Or-ct_853_cytochrome_oxidase_subunit_1_(COI)_gene_partial_cds_mitochondrial
CTCTACTTAATCTTCGGCGCATGAGCAGGCATAATCGGCACCTCCCTAAGCCTACTCATCCGCGCAGAACTAGGCCAACCAGGAACCCTCCTAGGAGACGACCAAATCTACAACGTAATTGTTACCGCCCACGCCTTTGTAATAATCTTCTTCATAGTAATACCAATCATAATTGGAGGATTCGGAAACTGACTAGTCCCTCTCATAATCGGCGCCCCTGACATAGCATTCCCACGCATAAACAACATAAGCTTCTGACTACTCCCACCATCCTTCCTCCTTCTCCTAGCCTCCTCCACAATCGAAGCAGGAGCAGGCACAGGATGAACAGTCTACCCGCCTCTAGCAGGAAACCTAGCCCACGCAGGAGCCTCAGTAGACCTAGCTATCTTTTCCCTTCACCTAGCAGGTGTATCCTCCATCCTAGGAGCAATCAACTTCATCACAACAGCCATCAACATAAAACCTCCCTCCCTATCACAATACCAAACTCCACTATTCGTTTGATCCGTACTAATCACAGCCGTACTACTCCTACTATCCCTACCAGTCCTAGCCGCCGGAATCACTATACTCCTCACAGACCGTAACCTAAACACCACATTCTTTGACCCTGCAGGAGGAGGAGACCCAATCCTGTACCAACAT
>gi|197256589|gb|FJ028171.1|_Pseudoseisura_gutturalis_voucher_MACN-Or-ct_3016_cytochrome_oxidase_subunit_1_(COI)_gene_partial_cds_mitochondrial
CTCTATCTAATTTTCGGAGCATGAGCCGGTATAATTGGAACCGCCCTTAGCCTTCTAATTCGAGCTGAACTTGGACAACCAGGTACTCTTCTAGGTGATGATCAAATTTACAATGTAATTGTCACCGCCCATGCCTTCGTAATAATCTTCTTTATAGTTATACCCATTATAATCGGTGGTTTTGGCAACTGACTAGTCCCCTTAATAATTGGTGCTCCAGACATAGCCTTTCCTCGAATAAACAATATAAGCTTCTGACTTCTACCTCCATCCTTTCTACTCCTCCTAGCCTCCTCAACAGTAGAAGCAGGAGTAGGAACAGGATGAACAGTCTACCCACCACTAGCAGGCAACTTAGCCCACGCTGGTGCTTCAGTCGACCTGGCCATCTTCTCTCTCCACTTAGCTGGTGTATCCTCTATCCTAGGGGCTATCAACTTTATCACAACTGCTATCAACATAAAACCACCCACTCTCTCACAATACCAAACACCCCTATTCGTCTGATCTGTTCTCATCACTGCCGTACTTCTCCTACTCTCACTCCCTGTCTTAGCCGCCGGCATCACAATACTACTAACGGACCGTAACCTAAACACTACATTCTTTGACCCAGCCGGGGGTGGAGACCCAGTCCTATACCAACAC
>gi|197256585|gb|FJ028169.1|_Pseudoseisura_gutturalis_voucher_MACN-Or-ct_2721_cytochrome_oxidase_subunit_1_(COI)_gene_partial_cds_mitochondrial
CTCTATCTAATTTTCGGAGCATGAGCCGGTATAATTGGAACCGCCCTTAGCCTTCTAATTCGAGCTGAACTTGGACAACCAGGTACTCTTCTAGGTGATGATCAAATTTACAATGTAATTGTCACCGCCCATGCCTTCGTAATAATCTTCTTTATAGTTATACCCATTATAATCGGTGGTTTTGGCAACTGACTAGTCCCCTTAATAATTGGTGCTCCAGACATAGCCTTTCCTCGAATAAACAATATAAGCTTCTGACTTCTACCTCCATCCTTTCTACTCCTCCTAGCCTCCTCAACAGTAGAAGCAGGAGTAGGAACAGGATGAACAGTCTACCCACCACTAGCAGGCAACTTAGCCCACGCTGGTGCTTCAGTCGACCTGGCCATCTTCTCTCTCCACTTAGCTGGTGTATCCTCTATCCTAGGGGCTATCAACTTTATCACAACTGCTATCAACATAAAACCACCCACTCTCTCACAATACCAAACACCCCTATTCGTCTGATCTGTTCTCATCACTGCCGTACTTCTCCTACTCTCACTCCCTGTCTTAGCCGCCGGCATCACAATACTACTAACGGACCGTAACCTAAACACTACATTCTTTGACCCAGCCGGGGGTGGAGACCCAGTCCTATACCAACAC
>gi|197256581|gb|FJ028167.1|_Pseudoseisura_gutturalis_voucher_MACN-Or-ct_2713_cytochrome_oxidase_subunit_1_(COI)_gene_partial_cds_mitochondrial
CTCTATCTAATTTTCGGAGCATGAGCCGGTATAATTGGAACCGCCCTTAGCCTTCTAATTCGAGCTGAACTTGGACAACCAGGTACTCTTCTAGGTGATGATCAAATTTACAATGTAATTGTCACCGCCCATGCCTTCGTAATAATCTTCTTTATAGTTATACCCATTATAATCGGTGGTTTTGGCAACTGACTAGTCCCCTTAATAATTGGTGCTCCAGACATAGCCTTTCCTCGAATAAACAATATAAGCTTCTGACTTCTACCTCCATCCTTTCTACTCCTCCTAGCCTCCTCAACAGTAGAAGCAGGAGTAGGAACAGGATGAACAGTCTACCCACCACTAGCAGGCAACTTAGCCCACGCTGGTGCTTCAGTCGACCTGGCCATCTTCTCTCTCCACTTAGCTGGTGTATCCTCTATCCTAGGGGCTATCAACTTTATCACAACTGCTATCAACATAAAACCACCCACTCTCTCACAATACCAAACACCCCTATTCGTCTGATCTGTTCTCATCACTGCCGTACTTCTCCTACTCTCACTCCCTGTCTTAGCCGCCGGCATCACAATACTACTAACGGACCGTAACCTAAACACTACATTCTTTGACCCAGCCGGGGGTGGAGACCCAGTCCTATACCAACAC
>gi|197256577|gb|FJ028165.1|_Pseudoleistes_virescens_voucher_MACN-Or-ct_2143_cytochrome_oxidase_subunit_1_(COI)_gene_partial_cds_mitochondrial
CTGTACNTAATTTTCGGCGCATGAGCCGGAATAGTAGGTACCGCCCTAAGCCTCCTCATCCGAGCAGAACTAGGCCAACCTGGAGCTCTTCTAGGAGACGACCAAGTCTACAACGTAGTCGTCACGGCCCATGCTTTCGTAATAATCTTCTTCATAGTCATGCCAATTATAATCGGGGGATTCGGGAACTGACTAGTCCCCCTAATAATTGGAGCCCCAGATATGGCATTCCCACGAATGAACAACATAAGCTTCTGACTACTTCCCCCATCCTTTCTCCTCCTCCTAGCATCTTCCACAGTTGAAGCAGGCGTAGGAACAGGCTGAACAGTATACCCCCCACTAGCAGGCAACCTAGCCCACGCCGGAGCCTCAGTAGACCTAGCAATTTTCTCCTTACATCTAGCCGGTATCTCTTCAATTCTAGGGGCAATCAACTTCATTACGACAGCAATCAACATAAAACCTCCTGCTCTATCACAATACCAAACCCCCCTATTCGTTTGATCCGTCCTAATCACTGCAGTACTTCTACTTCTATCTCTACCAGTTCTAGCCGCAGGAATTACAATACTTCTCACAGACCGCAACCTTAACACCACATTCTTTGACCCTGCTGGGGGAGGAGACCCTGTGCTGTACCAGCAC
>gi|197256573|gb|FJ028163.1|_Pseudoleistes_guirahuro_voucher_MACN-Or-cp_50_cytochrome_oxidase_subunit_1_(COI)_gene_partial_cds_mitochondrial
----------------------GAGCCGGAATAGTAGGTACCGCCNTAAGCCTCCTCATCCGAGCAGAGCTAGGCCAACCTGGAGCTCTTCTAGGAGACGACCAAGTCTACAACGTAGTTGTCACGGCTCATGCTTTCGTAATAATCTTCTTCATAGTCATGCCAATTATAATCGGGGGATTCGGAAACTGACTAGTCCCCCTAATAATTGGAGCCCCAGATATGGCATTCCCACGAATGAACAATATAAGCTTCTGACTACTTCCCCCATCCTTCCTCCTCCTCCTAGCATCTTCCACAGTTGAAGCAGGAGTAGGAACAGGCTGAACAGTATACCCCCCACTAGCAGGCAACCTAGCCCACGCCGGAGCCTCAGTAGACCTAGCAATTTTCTCCTTACATCTAGCCGGTATCTCTTCAATTCTAGGGGCAATCAACTTCATTACAACAGCAATCAACATAAAACCTCCTGCTCTATCACAATACCAAACTCCCCTATTCGTTTGATCCGTCCTAATCACTGCAGTACTTCTACTTCTATCTCTACCAGTTCTAGCCGCAGGAATTACAATGCTTCTCACAGACCGCAACCTTAACACCACATTCTTTGATCCTGCTGGGGGAGGGGACCCTGTACTGTACCAACAC
>gi|197256569|gb|FJ028161.1|_Pseudocolopteryx_sclateri_voucher_MACN-Or-ct_1546_cytochrome_oxidase_subunit_1_(COI)_gene_partial_cds_mitochondrial
CTATACCTAATTTTTGGCGCCTGGGCCGGCATAATTGGTACCGCCCTGAGCCTCCTTATCCGAGCAGAACTTGGACAACCAGGGACTCTCCTAGGAGATGATCAGATCTACAACGTAATCGTTACCGCCCATGCTTTCGTAATAATCTTCTTTATAGTCATACCCATTATGATTGGAGGGTTCGGCAACTGGCTAGTCCCATTAATAATTGGAGCCCCCGATATAGCATTCCCACGCATAAATAACATAAGCTTTTGATTACTTCCCCCATCATTCCTCCTCCTCTTGGCATCATCCACAGTGGAAGCTGGGGTAGGAACGGGATGAACTGTCTATCCACCATTGGCTGGAAATTTAGCCCACGCTGGTGCCTCAGTAGACCTAGCAATCTTCTCCCTTCACCTCGCAGGTGTGTCCTCAATCTTAGGTGCCATCAACTTCATTACTACTGCAATCAATATAAAACCCCCAGCCCTTTCACAATATCAAACACCTTTATTCGTGTGATCCGTCCTAATCACTGCAGTGCTCCTACTCCTTTCCCTCCCAGTCCTCGCTGCCGGCATCACAATACTTCTAACAGATCGCAACCTTAACACTACATTCTTTGACCCTGCAGGAGGCGGAGATCCAGTCTTATATCAACAT
>gi|197256565|gb|FJ028159.1|_Psarocolius_decumanus_voucher_MACN-Or-ct_1130_cytochrome_oxidase_subunit_1_(COI)_gene_partial_cds_mitochondrial
CTATACTTAATTTTCGGTGCATGAGCCGGAATGGTAGGTACCTCCCTAAGCCTCCTCATCCGAGCAGAGCTAGGCCAACCTGGAGCCCTTCTAGGAGACGACCAAGTTTACAACGTAGTCGTCACAGCCCATGCATTCGTGATAATCTTCTTCATAGTTATACCCATTATAATCGGAGGGTTCGGAAACTGACTAGTTCCCCTAATAATTGGAGCCCCCGACATAGCATTCCCACGAATGAACAACATAAGCTTCTGACTACTTCCCCCATCCTTCCTTCTCCTCCTAGCATCCTCCACAGTTGAAGCAGGCGTGGGAACAGGCTGAACAGTGTACCCCCCACTAGCAGGTAACCTAGCCCACGCCGGAGCCTCAGTCGACCTTGCAATTTTCTCCCTGCATTTGGCCGGTATCTCCTCAATTCTAGGAGCAATCAACTTTATCACAACAGCAATCAACATAAAACCCCCTGCCCTTTCACAATACCAAACCCCATTATTCGTCTGATCTGTCCTAATCACCGCAGTTCTCCTACTCCTATCCCTTCCCGTTCTTGCCGCAGGGATTACAATACTCCTCACAGACCGTAACCTCAACACTACATTCTTTGACCCCGCTGGAGGAGGAGACCCTGTCCTATACCAGCAC
>gi|197256561|gb|FJ028157.1|_Poospiza_torquata_voucher_MACN-Or-ct_2824_cytochrome_oxidase_subunit_1_(COI)_gene_partial_cds_mitochondrial
CTGTACCTANTCTTCGGCGCCTGAGCCGGAATAGTGGGTACTGCCCTAAGCCTCCTCATCCGAGCAGAACTAGGCCAACCTGGCGCCCTCCTAGGAGACGACCAAGTCTACAACGTAATCGTCACAGCCCATGCTTTCGTAATAATCTTCTTCATAGTTATACCAATTATAATCGGGGGATTCGGTAATTGACTAGTCCCCCTAATAATTGGAGCCCCAGACATAGCATTCCCACGAATAAACAACATAAGCTTCTGACTACTTCCCCCATCCTTCCTACTCCTCCTGGCATCCTCTACAGTTGAAGCAGGAGTTGGTACAGGCTGAACAGTGTATCCCCCACTAGCCGGTAACCTGGCCCACGCCGGAGCCTCAGTTGACCTTGCAATCTTCTCCCTACACCTAGCCGGCATCTCCTCAATCCTAGGAGCAATCAACTTCATTACAACAGCTATCAACATAAAACCCCCTGCCCTATCACAATACCAAACTCCCCTATTCGTTTGATCAGTACTAATCACTGCAGTACTACTACTTCTCTCCCTCCCAGTCCTAGCCGCAGGCATCACAATGCTCCTCACAGACCGTAACCTTAACACAACATTCTTCGACCCCGCGGGAGGAGGAGACCCCGTTCTATACCAACAC
>gi|197256557|gb|FJ028155.1|_Poospiza_torquata_voucher_MACN-Or-ct_2755_cytochrome_oxidase_subunit_1_(COI)_gene_partial_cds_mitochondrial
CTGTACCTAATCTTCGGCGCCTGAGCCGGAATAGTGGGTACTGCCCTAAGCCTCCTCATCCGAGCAGAACTAGGCCAACCTGGCGCCCTCCTAGGAGACGACCAAGTCTACAACGTAATCGTCACAGCCCATGCTTTCGTAATAATCTTCTTCATAGTTATACCAATTATAATCGGGGGATTCGGTAATTGACTAGTCCCCCTAATAATTGGAGCCCCAGACATAGCATTCCCACGAATAAACAACATAAGCTTCTGACTACTTCCCCCATCCTTCCTACTCCTCCTGGCATCCTCTACAGTTGAAGCAGGAGTTGGTACAGGCTGAACAGTGTATCCCCCACTAGCCGGTAACCTGGCCCACGCCGGAGCCTCAGTTGACCTTGCAATCTTCTCCCTACACCTAGCCGGCATCTCCTCAATCCTAGGAGCAATCAACTTCATTACAACAGCTATCAACATAAAACCCCCTGCCCTATCACAATACCAAACTCCCCTATTCGTTTGATCAGTACTAATCACTGCAGTACTACTACTTCTCTCCCTCCCAGTCCTAGCCGCAGGCATCACAATGCTCCTCACAGACCGTAACCTTAACACAACATTCTTCGACCCCGCGGGAGGAGGAGACCCCGTTCTATACCAACAC
>gi|197256553|gb|FJ028153.1|_Poospiza_ornata_voucher_MACN-Or-ct_2795_cytochrome_oxidase_subunit_1_(COI)_gene_partial_cds_mitochondrial
CTGTACCTGATCTTCGGCGCATGAGCCGGAATAGTAGGTACTGCCCTAAGCCTCCTCATCCGAGCAGAACTAGGCCAACCTGGAGCCCTCCTGGGAGACGACCAAGTCTACAACGTAGTCGTCACAGCCCATGCTTTCGTAATAATCTTCTTCATAGTTATACCAATTATAATCGGAGGGTTCGGAAATTGACTAGTCCCCCTAATAATCGGAGCCCCAGACATAGCCTTCCCACGAATAAACAACATAAGCTTCTGACTGCTTCCCCCATCTTTCCTCCTTCTTTTAGCCTCTTCTACAGTTGAAGCAGGCGTCGGCACAGGCTGAACAGTGTACCCACCACTAGCTGGCAACTTAGCCCACGCTGGAGCCTCAGTTGACCTCGCAATCTTCTCCCTGCACCTAGCCGGCATCTCTTCAATCCTAGGAGCAATCAACTTCATTACAACAGCCATCAACATAAAACCCCCTGCCCTCTCACAATACCAAACCCCCCTGTTCGTTTGATCAGTACTAATCACTGCAGTACTACTCCTCCTATCTCTGCCAGTCCTTGCTGCAGGAATCACAATACTCCTCACAGACCGCAACCTTAACACCACATTCTTTGACCCAGCCGGAGGAGGAGACCCCATCCTATACCAACAC
>gi|197256549|gb|FJ028151.1|_Poospiza_whitii_voucher_MACN-Or-ct_2119_cytochrome_oxidase_subunit_1_(COI)_gene_partial_cds_mitochondrial
CTGTACNTGATCTTCGGCGCATGAGCCGGAATAGTAGGTACTGCCCTAAGCCTCCTCATCCGAGCAGAGCTAGGCCAACCCGGGGCCCTCCTGGGAGACGACCAAGTCTACAACGTGGTCGTTACAGCCCATGCTTTCGTAATAATCTTCTTCATAGTTATACCAATTATAATCGGAGGATTCGGAAATTGACTAGTCCCCCTAATAATTGGAGCCCCAGACATAGCCTTCCCACGAATAAACAACATAAGCTTCTGACTACTCCCCCCATCCTTCCTACTCCTCCTAGCCTCCTCCACAGTTGAAGCAGGCGTCGGTACAGGCTGAACAGTGTATCCCCCACTAGCCGGCAACTTAGCCCACGCTGGAGCTTCAGTTGACCTCGCAATCTTCTCCTTACACTTAGCCGGTATCTCTTCAATCCTAGGGGCAATCAACTTCATCACAACAGCCATCAACATAAAACCCCCTGCCCTCTCACAATACCAAACCCCTCTATTTGTTTGATCCGTACTAATCACTGCTGTACTACTACTCCTATCTCTACCAGTCCTTGCTGCAGGAATTACAATGCTCCTTACAGACCGCAACCTCAACACTACCTTCTTCGACCCAGCCGGTGGAGGAGACCCCATCCTATACCAACAC
>gi|197256545|gb|FJ028149.1|_Poospiza_whitii_voucher_MACN-Or-ct_2132_cytochrome_oxidase_subunit_1_(COI)_gene_partial_cds_mitochondrial
CTGTACNTGATNTTCGGCGCATGAGCCGGAATAGTAGGTACTGCCCTAAGCCTCCTCATCCGAGCAGAGCTAGGCCAACCCGGGGCCCTCCTGGGAGACGACCAAGTCTACAACGTGGTCGTTACAGCCCATGCTTTCGTAATAATCTTCTTCATAGTTATACCAATTATAATCGGAGGATTCGGAAATTGACTAGTCCCCCTAATAATTGGAGCCCCAGACATAGCCTTCCCACGAATAAACAACATAAGCTTCTGACTACTCCCCCCATCCTTCCTACTCCTCCTAGCCTCCTCCACAGTTGAAGCAGGCGTCGGTACAGGCTGAACAGTGTATCCCCCACTAGCCGGCAACTTAGCCCACGCTGGAGCTTCAGTTGACCTCGCAATCTTCTCCTTACACTTAGCCGGTATCTCTTCAATCCTAGGGGCAATCAACTTCATCACAACAGCCATCAACATAAAACCCCCTGCCCTCTCACAATACCAAACCCCTCTATTTGTTTGATCCGTACTAATCACTGCTGTACTACTACTCCTATCTCTACCAGTCCTTGCTGCAGGAATTACAATGCTCCTTACAGACCGCAACCTCAACACTACCTTCTTCGACCCAGCCGGTGGAGGAGACCCCATCCTATACCAACAC
>gi|197256541|gb|FJ028147.1|_Poospiza_melanoleuca_voucher_MACN-Or-ct_3178_cytochrome_oxidase_subunit_1_(COI)_gene_partial_cds_mitochondrial
------------TTCGGTGCCTGAGCCGGGATGGTAGGTACTGCCCTAAGCCTCCTCATCCGAGCAGAACTAGGCCAACCTGGCGCCCTCCTAGGAGACGACCAAGTCTACAACGTAATCGTCACGGCCCATGCTTTCGTAATAATCTTCTTCATAGTTATACCAATTATAATCGGAGGATTCGGTAACTGACTAGTCCCCCTAATAATTGGAGCTCCAGACATAGCATTCCCACGAATAAACAACATAAGCTTCTGACTACTCCCCCCATCCTTCCTACTCCTCCTAGCATCTTCTACAGTAGAAGCAGGAGTCGGCACAGGCTGAACAGTGTATCCACCGCTAGCCGGCAACCTAGCCCACGCCGGAGCCTCAGTTGACCTTGCAATCTTCTCCCTGCACCTGGCCGGTATCTCCTCAATCCTAGGAGCAATCAACTTCATTACAACAGCTATCAACATAAAACCCCCCGCCCTATCACAATACCAAACTCCCCTATTCGTTTGATCCGTACTAATCACTGCAGTGTTACTCCTACTCTCCCTCCCAGTCCTAGCCGCAGGAATCACAATGCTCCTCACAGACCGTAACCTTAACACCACATTCTTTGACCCCGCAGGAGGAGGAGACCCCGTTCTATACCAACAC
>gi|197256537|gb|FJ028145.1|_Poospiza_melanoleuca_voucher_MACN-Or-ct_1632_cytochrome_oxidase_subunit_1_(COI)_gene_partial_cds_mitochondrial
CTGTACCTAATCTTCGGTGCCTGAGCCGGGATGGTAGGTACTGCCCTAAGCCTCCTCATCCGAGCAGAACTAGGCCAACCTGGCGCCCTCCTAGGAGACGACCAAGTCTACAACGTAATCGTCACGGCCCATGCTTTCGTAATAATCTTCTTCATAGTTATACCAATTATAATCGGAGGATTCGGTAACTGACTAGTCCCCCTAATAATTGGAGCTCCAGACATAGCATTCCCACGAATAAACAACATAAGCTTCTGACTACTCCCCCCATCCTTCCTACTCCTCCTAGCATCTTCTACAGTAGAAGCAGGAGTCGGCACAGGCTGAACAGTGTATCCACCGCTAGCCGGCAACCTAGCCCACGCCGGAGCCTCAGTTGACCTTGCAATCTTCTCCCTGCACCTAGCCGGTATCTCCTCAATCCTAGGAGCAATCAACTTCATTACAACAGCTATCAACATAAAACCCCCCGCCCTATCACAATACCAAACTCCCCTATTCGTTTGATCAGTACTAATCACTGCAGTGTTACTCCTACTCTCCCTCCCAGTCCTAGCCGCAGGAATCACAATGCTCCTCACAGACCGTAACCTTAACACCACATTCTTTGACCCCGCAGGAGGAGGAGACCCCGTTCTATACCAACAC
>gi|197256533|gb|FJ028143.1|_Poospiza_hypochondria_voucher_MACN-Or-ct_1061_cytochrome_oxidase_subunit_1_(COI)_gene_partial_cds_mitochondrial
CTGTACCTAATCTTCGGCGCATGAGCCGGAATAGTAGGTACTGCCCTAAGCCTCCTTATCCGAGCAGAACTAGGCCAACCCGGGGCCCTTCTAGGAGATGACCAAGTTTACAACGTAATCGTCACGGCCCATGCTTTCGTAATAATTTTCTTTATAGTTATACCAATTATGATCGGAGGGTTCGGAAACTGACTAGTCCCCCTAATAATTGGAGCCCCCGACATAGCATTCCCACGAATAAACAACATAAGCTTCTGACTATTACCTCCATCCTTCCTGCTCCTCTTAGCCTCTTCCACTGTTGAAGCGGGCGCCGGCACAGGATGAACAGTATACCCCCCATTAGCCGGCAACCTAGCCCACGCCGGAGCCTCAGTCGACCTCGCAATCTTCTCCCTACATCTGGCCGGTATCTCTTCAATTCTAGGGGCAATCAACTTCATCACAACAGCTATCAACATAAAACCTCCTGCCCTCTCACAATACCAAACCCCCCTATTCGTCTGATCCGTCCTAATTACTGCAGTACTACTCCTGCTATCCCTTCCAGTTCTTGCTGCAGGAATTACTATGCTCCTTACAGACCGTAATCTTAACACCACATTCTTCGACCCCGCAGGAGGAGGCGACCCAGTTCTGTACCAACAC
>gi|197256529|gb|FJ028141.1|_Poospiza_erythrophrys_voucher_MACN-Or-ct_920_cytochrome_oxidase_subunit_1_(COI)_gene_partial_cds_mitochondrial
CTGTACCTAATTTTCGGCGCCTGAGCCGGAATAGTAGGTACAGCCCTAAGCCTCCTCATCCGAGCAGAACTGGGCCAACCCGGTGCCCTCCTGGGAGACGACCAAGTCTACAACGTAATCGTCACAGCCCATGCTTTCGTAATAATCTTCTTCATAGTCATGCCAATTATAATCGGAGGATTCGGTAACTGATTAGTCCCCCTAATAATTGGAGCCCCAGACATAGCATTCCCACGAATAAACAACATAAGCTTCTGACTACTTCCCCCATCCTTCCTACTCCTCCTGGCATCTTCTACAGTTGAAGCAGGAGCCGGTACAGGCTGAACAGTATACCCCCCATTAGCCGGTAACCTAGCCCACGCCGGAGCCTCAGTCGACCTAGCAATTTTCTCCCTGCACCTAGCCGGCATCTCCTCAATCCTAGGAGCAATTAACTTCATTACAACAGCTATCAACATAAAACCCCCTGCTCTGTCACAATACCAAACCCCCCTATTCGTTTGATCAGTACTAATCACTGCAGTACTACTACTACTCTCCCTCCCAGTCCTAGCCGCAGGAATCACAATACTCCTCACAGACCGTAACCTCAACACTACATTCTTCGATCCCGCGGGAGGAGGAGATCCCGTTTTATACCAACAC
>gi|197256525|gb|FJ028139.1|_Poospiza_erythrophrys_voucher_MACN-Or-ct_709_cytochrome_oxidase_subunit_1_(COI)_gene_partial_cds_mitochondrial
CTGTACCTAATTTTCGGCGCCTGAGCCGGAATAGTAGGTACAGCCCTAAGCCTCCTCATCCGAGCAGAACTGGGCCAACCCGGTGCCCTCCTGGGAGACGACCAAGTCTACAACGTAATCGTCACAGCCCATGCTTTCGTAATAATCTTCTTCATAGTCATGCCAATTATAATCGGAGGATTCGGTAACTGATTAGTCCCCCTAATAATTGGAGCCCCAGACATAGCATTCCCACGAATAAACAACATAAGCTTCTGACTACTTCCCCCATCCTTCCTACTCCTCCTGGCATCTTCTACAGTTGAAGCAGGAGCCGGTACAGGCTGAACAGTATACCCCCCATTAGCCGGTAACCTAGCCCACGCCGGAGCCTCAGTCGACCTAGCAATTTTCTCCCTGCACCTAGCCGGCATCTCCTCAATCCTAGGAGCAATTAACTTCATTACAACAGCTATCAACATAAAACCCCCTGCTCTGTCACAATACCAAACCCCCCTATTCGTTTGATCAGTACTAATCACTGCAGTACTACTACTACTCTCCCTCCCAGTCCTAGCCGCAGGAATCACAATACTCCTCACAGACCGTAACCTCAACACTACATTCTTCGATCCCGCGGGAGGAGGAGATCCCGTTTTATACCAACAC
>gi|197256521|gb|FJ028137.1|_Poospiza_baeri_voucher_MACN-Or-ct_1006_cytochrome_oxidase_subunit_1_(COI)_gene_partial_cds_mitochondrial
CTATACTTAATCTTCGGCGCATGAGCCGGAATAGTAGGTACCGCCCTAAGCCTCCTCATCCGAGCAGAACTAGGCCAACCCGGAGCTCTCCTAGGAGACGACCAAATCTACAACGTAATCGTCACGGCCCATGCTTTCGTAATAATCTTCTTCATAGTTATACCAATCATAATCGGAGGGTTCGGAAACTGACTAGTTCCATTAATAATTGGAGCCCCAGACATAGCCTTCCCCCGAATAAACAATATAAGCTTCTGACTACTCCCCCCATCCTTCCTCCTCCTCTTAGCATCTTCTACGGTCGAAGCAGGCGTTGGTACAGGTTGAACGGTATATCCCCCACTAGCCGGCAACCTAACCCACGCCGGAGCCTCAGTTGACCTAGCAATCTTTTCCCTACACCTAGCCGGTATCTCCTCCATCCTAGGGGCAATCAACTTCATTACAACAGCCATCAACATAAAACCCCCTGCCCTCTCACAATACCAAACCCCCCTATTCGTCTGATCCGTATTAATCACAGCAGTCTTACTACTCCTGTCCCTCCCAGTTCTTGCTGCAGGAATCACAATACTCCTCACAGACCGCAACCTTAACACTACATTCTTTGACCCTGCCGGAGGAGGAGACCCTGTCCTATACCAACAC
>gi|197256517|gb|FJ028135.1|_Polioptila_dumicola_voucher_MACN-Or-ct_2172_cytochrome_oxidase_subunit_1_(COI)_gene_partial_cds_mitochondrial
CTATACCTTATTTTCGGCGCCTGAGCCGGAATAGTAGGAACTGCCCTAAGCCTCCTCATCCGAGCAGAACTAGGTCAACCAGGAGCCCTCCTAGGAGATGACCAAGTCTACAATGTAATTGTCACAGCCCATGCCTTCGTAATAATTTTCTTCATAGTTATGCCAATTATAATCGGCGGATTCGGAAACTGACTAGTCCCCCTAATGATTGGAGCTCCCGACATAGCATTCCCCCGAATAAACAACATAAGCTTCTGACTATTACCCCCATCATTCCTCCTACTACTAGCCTCATCCACCGTCGAAGCAGGAGTAGGAACCGGCTGAACAGTATACCCGCCCCTAGCCGGAAACCTCGCCCACGCCGGAGCCTCCGTAGACCTAGCCATCTTCTCCCTACATTTAGCCGGTATCTCCTCAATCCTCGGAGCAATCAACTTCATCACAACAGCGATCAACATAAAACCCCCTGCCCTATCCCAATACCAAACCCCTCTGTTCGTCTGATCAGTACTGATTACCGCAGTCCTACTGCTACTATCCCTACCCGTGCTTGCCGCAGGCATCACCATGCTACTAACAGACCGTAACCTAAACACCACCTTCTTTGACCCAGCAGGAGGAGGTGACCCAGTACTGTACCAACAC
>gi|197256513|gb|FJ028133.1|_Polioptila_dumicola_voucher_MACN-Or-ct_3236_cytochrome_oxidase_subunit_1_(COI)_gene_partial_cds_mitochondrial
--------TATTTTCGGCGCCTGAGCCGGAATAGTAGGAACTGCCCTAAGCCTCCTCATCCGAGCAGAACTAGGTCAACCAGGAGCCCTCCTAGGAGATGACCAAGTCTACAATGTAATTGTCACAGCCCATGCCTTCGTAATAATTTTCTTCATAGTTATGCCAATTATAATCGGCGGATTCGGAAACTGACTAGTCCCCCTAATGATTGGAGCTCCCGACATAGCATTCCCCCGAATAAACAACATAAGCTTCTGACTACTACCCCCATCATTCCTCCTACTACTAGCCTCATCCACCGTCGAAGCAGGAGTAGGAACCGGCTGAACAGTATACCCGCCCCTAGCCGGTAACCTCGCCCACGCCGGAGCCTCCGTAGACCTAGCCATCTTCTCCCTACATTTAGCCGGTATCTCCTCAATCCTCGGAGCAATCAACTTCATCACAACAGCGATCAACATAAAACCCCCTGCCCTATCCCAATACCAAACCCCTCTGTTCGTCTGATCAGTACTGATTACCGCAGTCCTACTGCTACTATCCCTACCCGTGCTTGCCGCAGGCATCACCATGCTACTAACAGACCGTAACCTAAACACCACCTTCTTTGACCCAGCAGGAGGAGGTGACCCAGTACTGTACCAACAC
>gi|197256509|gb|FJ028131.1|_Polioptila_dumicola_voucher_MACN-Or-ct_1573_cytochrome_oxidase_subunit_1_(COI)_gene_partial_cds_mitochondrial
CTATACCTTATTTTCGGCGCCTGAGCCGGAATAGTAGGAACTGCCCTAAGCCTCCTCATCCGAGCAGAACTAGGTCAACCAGGAGCCCTCCTAGGAGATGACCAAGTCTACAATGTAATTGTCACAGCCCATGCCTTCGTAATAATTTTCTTCATAGTTATGCCAATTATAATCGGCGGATTCGGAAACTGACTAGTCCCCCTAATGATTGGAGCTCCCGACATAGCATTCCCCCGAATAAACAACATAAGCTTCTGACTACTACCCCCATCATTCCTCCTACTACTAGCCTCATCCACCGTCGAAGCAGGAGTAGGAACCGGCTGAACAGTATACCCGCCCCTAGCCGGTAACCTCGCCCACGCCGGAGCCTCCGTAGACCTAGCCATCTTCTCCCTACATTTAGCCGGTATCTCCTCAATCCTCGGAGCAATCAACTTCATCACAACAGCGATCAACATAAAACCCCCTGCCCTATCCCAATACCAAACCCCTCTGTTCGTCTGATCAGTACTGATTACCGCAGTCCTACTGCTACTATCCCTACCCGTGCTTGCCGCAGGCATCACCATGCTACTAACAGACCGTAACCTAAACACCACCTTCTTTGACCCAGCAGGAGGAGGTGACCCAGTACTGTACCAACAC
>gi|197256505|gb|FJ028129.1|_Polioptila_dumicola_voucher_MACN-Or-ct_1901_cytochrome_oxidase_subunit_1_(COI)_gene_partial_cds_mitochondrial
CTATACCTTATTTTCGGCGCCTGAGCCGGAATAGTAGGAACTGCCCTAAGCCTCCTCATCCGAGCAGAACTAGGTCAACCAGGAGCCCTCCTAGGAGATGACCAAGTCTACAATGTAATTGTCACAGCCCATGCCTTCGTAATAATTTTCTTCATAGTTATGCCAATTATAATCGGCGGATTCGGAAACTGACTAGTCCCCCTAATGATTGGAGCTCCCGACATAGCATTCCCCCGAATAAACAACATAAGCTTCTGACTATTACCCCCATCATTCCTCCTACTACTAGCCTCATCCACCGTCGAAGCAGGAGTAGGAACCGGCTGAACAGTATACCCGCCCCTAGCCGGAAACCTCGCCCACGCCGGAGCCTCCGTAGACCTAGCCATCTTCTCCCTACATTTAGCCGGTATCTCCTCAATCCTCGGAGCAATCAACTTCATCACAACAGCGATCAACATAAAACCCCCTGCCCTATCCCAATACCAAACCCCTCTGTTCGTCTGATCAGTACTGATTACCGCAGTCCTACTGCTACTATCCCTACCCGTGCTTGCCGCAGGCATCACCATGCTACTAACAGACCGTAACCTAAACACCACCTTCTTTGACCCAGCAGGAGGAGGTGACCCAGTACTGTACCAACAC
>gi|197256501|gb|FJ028127.1|_Podiceps_major_voucher_MACN-Or-ct_2123_cytochrome_oxidase_subunit_1_(COI)_gene_partial_cds_mitochondrial
CTGTACTTAATTTTTGGTGCATGAGCCGGCATAGTCGGTACCGCCCTAAGCCTACTCATCCGCGCAGAACTAGGCCAACCAGGAACCCTCCTAGGAGACGACCAAATTTATAATGTAATCGTCACCGCTCACGCCTTCGTAATAATCTTCTTCATAGTTATACCAATCATAATTGGGGGATTTGGAAACTGATTAGTCCCCCTAATAATCGGAGCTCCCGATATAGCATTCCCCCGCATAAACAACATAAGCTTCTGGCTCCTTCCCCCATCCTTCCTACTCCTATTAGCCTCATCAACAGTAGAAGCCGGAGCAGGCACAGGATGAACTGTATACCCACCACTAGCCGGTAACCTGGCCCATGCCGGCGCCTCAGTAGATCTAGCCATCTTTTCACTCCATCTAGCAGGTGTATCCTCCATTCTAGGGGCAATCAACTTCATCACAACTGCTATTAATATAAAACCACCAGCCCTTTCACAATATCAAACCCCCCTATTCGTATGATCCGTACTTATCACTGCCGTCCTGCTACTACTCTCACTTCCAGTCCTCGCCGCCGGCATTACCATACTACTAACAGACCGAAACCTAAATACCACATTCTTTGACCCCGCTGGAGGCGGAGACCCAGTCCTATATCAACAC
>gi|197256497|gb|FJ028125.1|_Podiceps_gallardoi_voucher_PG2_cytochrome_oxidase_subunit_1_(COI)_gene_partial_cds_mitochondrial
CTATACTTAATCTTTGGTGCATGAGCCGGCATAGTCGGCACCGCCCTAAGCCTACTCATCCGCGCAGAACTAGGCCAACCAGGAACCCTCCTAGGAGACGACCAAATCTACAATGTAATCGTCACCGCCCATGCCTTTGTAATAATCTTCTTCATAGTTATACCCATCATAATCGGGGGATTTGGAAACTGACTAGTCCCCCTAATAATCGGGGCCCCCGACATAGCATTCCCCCGCATAAACAACATGAGCTTCTGACTCCTCCCCCCATCCTTCCTACTACTCCTAGCTTCATCAACAGTAGAAGCCGGAGCAGGCACGGGATGAACCGTATACCCACCATTAGCCGGCAATCTAGCCCATGCTGGCGCCTCAGTAGACCTAGCCATCTTCTCACTCCACCTAGCAGGCGTATCCTCTATCCTAGGAGCAATCAACTTCATCACAACTGCCATCAACATAAAACCACCAGCCCTTTCACAGTACCAAACCCCCCTATTCGTATGATCCGTACTCATCACTGCCGTCCTACTACTACTCTCACTTCCAGTCCTTGCCGCCGGTATCACCATACTACTGACAGACCGAAACCTAAACACCACATTCTTTGACCCTGCCGGAGGCGGAGATCCAGTCCTATACNAACAC
>gi|197256493|gb|FJ028123.1|_Podager_nacunda_voucher_MACN-Or-ct_1397_cytochrome_oxidase_subunit_1_(COI)_gene_partial_cds_mitochondrial
CTCTACCTAATCTTTGGCGCATGAGCCGGCATAGTAGGAACCGCCCTAAGCCTACTCATCCGTGCCGAGCTAGGCCAACCCGGAACCCTCCTAGGAGACGACCAAATCTACAATGTAATCGTTACAGCTCATGCTTTTGTAATAATCTTCTTCATAGTAATACCAATCATAATCGGCGGGTTCGGAAACTGACTAATTCCACTAATAATTGGAGCCCCAGACATAGCATTCCCCCGCATAAACAACATAAGCTTCTGGCTACTTCCCCCATCCCTCCTTCTATTACTAGCCTCCTCCACAGTAGAGGCGGGAGCCGGTACAGGATGAACAGTATATCCACCACTAGCCGGAAACCTCGCCCACGCCGGAGCATCAGTCGACTTAGCTATCTTCTCCCTACACCTAGCAGGGGTCTCTTCTATCCTAGGCGCAATCAACTTCATCACCACCGCCATTAACATAAAACCTCCTGCCCTTTCACAATACCAAACCCCACTGTTCGTATGATCCGTACTAATCACTGCAGTGTTACTACTCCTGTCTCTCCCAGTATTAGCCGCAGGCATTACCATACTACTAACAGACCGCAACCTAAACACTACATTCTTTGACCCCGCCGGAGGAGGAGACCCAGTACTGTACCAACAC
>gi|197256489|gb|FJ028121.1|_Pluvianellus_socialis_voucher_MACN-Or-ct_210_cytochrome_oxidase_subunit_1_(COI)_gene_partial_cds_mitochondrial
CNGTACNTAATCTTCGGTGCATGAGCCGGCATAGTGGGAACCGCACTCAGCTTACTTATCCGCGCAGAACTAGGCCAACCCGGAACTCTTCTAGGAGATGACCAAATTTACAATGTAATTGTCACCGCCCATGCCTTCGTAATAATCTTCTTTATAGTTATACCAATCATAATTGGGGGCTTTGGAAACTGACTGGTGCCACTCATAATTGGCGCCCCTGACATAGCATTCCCCCGAATAAACAACATAAGCTTTTGACTGCTTCCCCCATCATTCTTACTACTTCTAGCCTCCTCCACAGTAGAAGCTGGAGCAGGCACAGGATGAACTGTGTATCCACCCCTAGCAGGCAATCTAGCCCATGCTGGAGCTTCAGTAGACCTAGCCATTTTCTCCCTTCACCTTGCAGGTGTATCATCTATCCTAGGAGCTATTAACTTCATCACCACAGCCATCAACATAAAACCCCCAGCTCTATCACAATACCAAACACCCCTATTCGTCTGATCCGTCCTCATTACAGCCGTCCTACTCCTACTCTCCCTCCCAGTCCTTGCTGCTGGCATTACTATACTACTCACAGACCGTAATTTAAATACCACATTCTTTGATCCAGCCGGAGGAGGTGATCCTGTCCTATATCAACAC
>gi|197256485|gb|FJ028119.1|_Pluvialis_dominica_voucher_MACN-Or-cp_56_cytochrome_oxidase_subunit_1_(COI)_gene_partial_cds_mitochondrial
CTATACCTAATCTTCGGCGCATGAGCCGGTATAGTCGGTACCGCCCTTAGCTTACTCATCCGTGCAGAACTTGGCCAACCAGGTACTCTACTGGGAGACGACCAAATCTATAATGTAATTGTTACTGCCCATGCCTTCGTAATAATCTTCTTCATAGTTATACCAATCATGATTGGGGGTTTCGGAAACTGACTAGTACCACTCATAATTGGTGCCCCCGACATAGCATTTCCCCGCATAAACAACATAAGCTTCTGACTACTTCCCCCATCATTCCTACTCCTCCTTGCCTCCTCCACAGTAGAAGCCGGAGCAGGCACAGGATGAACCGTATACCCCCCTCTAGCCGGTAACCTAGCTCACGCCGGAGCCTCAGTAGACCTGGCTATTTTTTCCCTCCACCTGGCAGGTGTATCTTCAATCCTAGGCGCAATTAACTTCATCACAACCGCCATCAACATAAAACCTCCTGCCCTATCACAATACCAAACTCCTCTATTTGTATGATCCGTCCTCATCACCGCCGTCCTGTTACTCCTTTCACTCCCAGTTCTTGCTGCTGGCATCACTATGCTACTAACAGACCGAAACCTGAACACCACATTCTTCGACCCTGCCGGAGGCGGAGACCCAGTCCTATATCAACAC
>gi|197256481|gb|FJ028117.1|_Plegadis_chihi_voucher_MACN-Or-ct_1529_cytochrome_oxidase_subunit_1_(COI)_gene_partial_cds_mitochondrial
CTATACCTAATCTTTGGTGCATGAGCTGGTATAATCGGAACAGCACTCAGCTTATTAATTCGTGCAGAACTGGGACAACCAGGCACCCTCCTGGGAGACGACCAAATCTACAACGTAATTGTCACCGCCCATGCTTTCGTAATAATCTTCTTCATAGTAATGCCAATCATGATCGGCGGATTTGGCAACTGACTTGTACCCCTCATAATCGGGGCACCCGATATAGCATTCCCACGCATAAACAACATAAGCTTCTGACTCCTTCCCCCCTCCTTCCTTCTCCTTCTAGCCTCCTCCACAGTAGAAGCAGGAGCAGGCACAGGGTGAACTGTATACCCACCACTTGCCGGCAACCTTGCCCATGCTGGTGCCTCAGTAGACCTTGCCATCTTCTCCCTCCACCTAGCAGGGGTGTCATCTATCTTAGGGGCAATTAACTTCATCACAACTGCTATCAACATAAAACCACCCGCCCTTTCACAATACCAAACACCCCTATTCGTCTGATCTGTCTTAATCACTGCCGTCTTACTGTTACTATCACTCCCAGTCCTCGCTGCTGGTATTACCATACTACTAACAGATCGAAACCTAAACACCACATTCTTCGACCCGGCTGGAGGAGGAGACCCCGTCCTATACCAACAC
>gi|197256477|gb|FJ028115.1|_Platyrinchus_mystaceus_voucher_MACN-Or-ct_2960_cytochrome_oxidase_subunit_1_(COI)_gene_partial_cds_mitochondrial
--------------------------------------------------CCTTCTTATCCGAGCAGAACTCGGACAGCCAGGAACCCTCCTAGGAGACGACCAAATCTATAACGTTATCGTCACCGCTCATGCCTTCGTAATAATCTTCTTCATAGTGATGCCCATTATAATCGGAGGATTCGGCAACTGATTAGTTCCCTTAATAATTGGAGCCCCCGACATAGCATTTCCCCGCATGAATAACATAAGCTTCTGACTTCTTCCCCCCTCCTTTCTACTCCTCCTAGCTTCATCTACCGTTGAAGCCGGAGTAGGTACAGGCTGAACCGTGTATCCTCCACTAGCCGGAAACCTCGCTCATGCTGGAGCTTCAGTAGATTTAGCTATTTTCTCCCTTCACTTAGCAGGTATCTCCTCCATCCTAGGTGCTATTAACTTCATCACTACCGCAGTCAACATAAAACCCCCAGCCCTTTCACAATATCAAACCCCCCTCTTTGTATGATCCGTCCTAATCACTGCAGTTCTACTACTTCTATCCCTCCCTGTCCTTGCCGCTGGCATCACCATGCTCCTCACAGACCGCAACCTAAACACCACATTCTTCGACCCCGCAGGAGGTGGAGACCCTGTTTTATACCAACAC
>gi|197256473|gb|FJ028113.1|_Platyrinchus_mystaceus_voucher_MACN-Or-ct_2859_cytochrome_oxidase_subunit_1_(COI)_gene_partial_cds_mitochondrial
CTTTATTTAATCTTTGGCGCTTGAGCTGGTATAATTGGTACCGCCCTAAGCCTTCTTATCCGAGCAGAACTCGGACAGCCAGGAACCCTCCTAGGAGACGACCAAATCTATAACGTTATCGTCACCGCTCATGCCTTCGTAATAATCTTCTTCATAGTGATGCCCATTATAATCGGAGGATTCGGCAACTGATTAGTTCCCTTAATAATTGGAGCCCCCGACATAGCATTTCCCCGCATGAATAACATAAGCTTCTGACTTCTTCCCCCCTCCTTTCTACTCCTCCTAGCTTCATCTACCGTTGAAGCCGGAGTAGGTACAGGCTGAACCGTGTATCCTCCACTAGCCGGAAACCTCGCTCATGCTGGAGCTTCAGTAGATTTAGCTATTTTCTCCCTTCACTTAGCAGGTATCTCCTCCATCCTAGGTGCTATTAACTTCATCACTACCGCAGTCAACATAAAACCCCCAGCCCTTTCACAATATCAAACCCCCCTCTTTGTATGATCCGTCCTAATCACTGCAGTTCTACTACTTCTATCCCTCCCTGTCCTTGCCGCTGGCATCACCATGCTCCTCACAGACCGCAACCTAAACACCACATTCTTCGACCCCGCAGGAGGTGGAGACCCTGTTTTATACCAACAC
>gi|197256469|gb|FJ028111.1|_Platalea_ajaja_voucher_MACN-Or-ct_1761_cytochrome_oxidase_subunit_1_(COI)_gene_partial_cds_mitochondrial
CTGTACCTAATTTTCGGCGCATGAGCTGGCATAGTTGGAACCGCACTCAGTCTACTCATCCGTGCAGAACTAGGCCAACCAGGAACACTCCTAGGAGACGACCAAATCTACAACGTAATCGTCACAGCCCATGCCTTCGTAATAATTTTCTTTATAGTAATACCAATCATAATTGGTGGGTTTGGCAACTGACTAGTCCCACTTATAATTGGTGCACCCGACATAGCATTCCCACGTATAAACAACATAAGCTTCTGACTATTGCCCCCCTCATTCTTACTCCTTCTAGCTTCATCCACAGTAGAAGCAGGGGCGGGTACTGGATGAACCGTATACCCACCACTCGCTGGCAACCTCGCCCACGCCGGAGCCTCAGTTGACCTGGCCATCTTCTCACTTCACCTAGCAGGTGTGTCATCCATCTTAGGGGCAATCAACTTTATCACAACTGCCATCAATATAAAACCACCAGCCCTTTCACAATACCAAACGCCCCTGTTCGTCTGATCAGTCCTAATTACTGCCGTCCTACTGCTACTCTCACTACCGGTCCTCGCTGCCGGCATCACCATGCTACTAACAGACCGAAACCTAAACACCACATTCTTCGACCCAGCCGGAGGAGGAGACCCAGTCCTATACCAGCAC
>gi|197256465|gb|FJ028109.1|_Pitangus_sulphuratus_voucher_MACN-Or-ct_1658_cytochrome_oxidase_subunit_1_(COI)_gene_partial_cds_mitochondrial
CTATATTTAATTTTTGGTGCCTGAGCAGGCATAATTGGCACAGCCCTAAGCCTACTCATCCGAGCAGAATTAGGACAACCAGGGACCCTCTTAGGAGATGACCAGATCTACAACGTAATCGTTACTGCTCACGCTTTCGTAATAATCTTCTTTATAGTAATGCCCATTATAATCGGAGGATTTGGTAACTGACTAGTTCCCCTAATAATTGGTGCCCCAGATATAGCATTTCCCCGTATAAACAACATAAGCTTCTGACTACTTCCCCCATCATTCCTCCTCCTCCTAGCTTCCTCTACAGTTGAAGCCGGAGTAGGAACTGGATGAACAGTCTACCCACCATTAGCCGGTAATCTAGCACATGCCGGAGCTTCAGTAGACCTGGCTATTTTTTCTCTCCACCTCGCAGGTGTTTCCTCCATCCTAGGTGCTATCAACTTCATTACTACTGCAATTAACATAAAACCACCAGCCTTATCACAATACCAAACCCCCCTATTCGTGTGATCTGTCCTAATCACTGCAGTTCTTCTTCTCCTCTCCCTCCCAGTCCTTGCTGCTGGCATTACCATGCTTTTAACAGACCGCAACCTCAACACCACATTCTTTGATCCCGCTGGAGGTGGAGACCCTGTTCTATATCAACAC
>gi|197256461|gb|FJ028107.1|_Pitangus_sulphuratus_voucher_MACN-Or-ct_3163_cytochrome_oxidase_subunit_1_(COI)_gene_partial_cds_mitochondrial
CTATATNTAATTTTTGGTGCCTGAGCAGGCATAATTGGCACAGCCCTAAGCCTACTCATCCGAGCAGAATTAGGACAACCAGGGACCCTCTTAGGAGATGACCAGATCTACAACGTAATCGTTACTGCTCACGCTTTCGTAATAATCTTCTTTATAGTAATGCCCATTATAATCGGAGGATTTGGTAACTGACTAGTTCCCCTAATAATTGGTGCCCCAGATATAGCATTTCCCCGTATAAACAACATAAGCTTCTGACTACTTCCCCCATCATTCCTCCTCCTCCTAGCTTCCTCTACAGTTGAAGCCGGAGTAGGAACTGGATGAACAGTCTACCCACCATTAGCCGGTAATCTAGCACATGCCGGAGCTTCAGTAGACCTGGCTATTTTTTCTCTCCACCTCGCAGGTGTTTCCTCCATCCTAGGTGCTATCAACTTCATTACTACTGCAATTAACATAAAACCACCAGCCTTATCACAATACCAAACCCCCCTATTCGTGTGATCTGTCCTAATCACTGCAGTTCTTCTTCTCCTCTCCCTCCCAGTCCTTGCTGCTGGCATTACCATGCTTTTAACAGACCGCAACCTCAACACCACATTCTTTGATCCCGCTGGAGGTGGAGACCCTGTTCTATATCAACAC
>gi|197256457|gb|FJ028105.1|_Pitangus_sulphuratus_voucher_MACN-Or-ct_2904_cytochrome_oxidase_subunit_1_(COI)_gene_partial_cds_mitochondrial
CTATATTTAATTTTTGGTGCCTGAGCAGGCATAATTGGCACAGCCCTAAGCCTACTCATCCGAGCAGAATTAGGACAACCAGGGACCCTCTTAGGAGATGACCAGATCTACAACGTAATCGTTACTGCTCACGCTTTCGTAATAATCTTCTTTATAGTAATGCCCATTATAATCGGAGGATTTGGTAACTGACTAGTTCCCCTAATAATTGGTGCCCCAGATATAGCATTTCCCCGTATAAACAACATAAGCTTCTGACTACTTCCCCCATCATTCCTCCTCCTCCTAGCTTCCTCTACAGTTGAAGCCGGAGTAGGAACTGGATGAACAGTCTACCCACCATTAGCCGGTAATCTAGCACATGCCGGAGCTTCAGTAGACCTGGCTATTTTTTCTCTCCACCTCGCAGGTGTTTCCTCCATCCTAGGTGCTATCAACTTCATTACTACTGCAATTAACATAAAACCACCAGCCTTATCACAATACCAAACCCCCCTATTCGTGTGATCTGTCCTAATCACTGCAGTTCTTCTTCTCCTCTCCCTCCCAGTCCTTGCTGCTGGCATTACCATGCTTTTAACAGACCGCAACCTCAACACCACATTCTTTGATCCCGCTGGAGGTGGAGACCCTGTTCTATATCAACAC
>gi|197256453|gb|FJ028103.1|_Pitangus_sulphuratus_voucher_MACN-Or-ct_1504_cytochrome_oxidase_subunit_1_(COI)_gene_partial_cds_mitochondrial
CTATATTTAATTTTTGGTGCCTGAGCAGGCATAATTNGCACAGCCCTAAGCCTACTCATCCGAGCAGAATTAGGACAACCAGGGACCCTCTTAGGAGATGACCAGATCTACAACGTAGTCGTTACTGCTCACGCTTTCGTAATAATCTTCTTTATAGTAATGCCCATTATAATCGGAGGATTTGGTAACTGACTAGTTCCCCTAATAATTGGTGCCCCAGATATAGCATTTCCCCGTATAAACAACATAAGCTTCTGACTACTTCCCCCATCATTCCTCCTCCTCCTAGCTTCCTCTACAGTTGAAGCCGGAGTAGGAACTGGATGAACAGTCTACCCACCATTAGCCGGTAATCTAGCACATGCCGGAGCTTCAGTAGACCTGGCTATTTTTTCTCTCCACCTCGCAGGTGTTTCCTCCATCCTAGGTGCTATCAACTTCATTACTACTGCAATTAACATAAAACCACCAGCCTTATCACAATACCAAACCCCCCTATTCGTGTGATCTGTCCTAATCACTGCAGTTCTTCTTCTCCTCTCCCTCCCAGTCCTTGCTGCTGGCATTACCATGCTTTTAACAGACCGCAACCTCAACACCACATTCTTTGATCCCGCTGGAGGTGGAGACCCTGTTCTATATCAACAC
>gi|197256449|gb|FJ028101.1|_Pipra_fasciicauda_voucher_MACN-Or-ct_3041_cytochrome_oxidase_subunit_1_(COI)_gene_partial_cds_mitochondrial
CTCTACCTTATTTTTGGTACATGAGCTGGTATAATCGGCACAGCCCTAAGCCTTCTTATTCGAGCAGAATTAGGACAACCAGGAACCCTTTTAGGTGACGACCAAATCTATAATGTAATCGTCACCGCACATGCCTTTGTTATAATTTTCTTCATAGTAATACCCATTATAATCGGAGGGTTTGGTAACTGACTAGTTCCATTAATAATTGGTGCCCCCGACATAGCATTCCCCCGAATAAATAATATAAGCTTCTGACTTCTTCCCCCATCCTTTCTTCTACTCCTAGCATCCTCTACAGTAGAAGCCGGGGCTGGAACAGGGTGAACAGTATACCCACCCCTAGCTGGAAATCTAGCTCACGCAGGCGCATCAGTAGACCTCGCCATCTTCTCTCTTCACCTAGCAGGTGTCTCTTCCATTCTCGGAGCAATCAACTTTATCACTACGGCAATTAATATAAAACCACCTGCCCTTTCACAATACCAAACCCCTTTATTCGTTTGATCCGTCTTAATTACTGCAGTATTACTTCTCCTCTCTCTACCAGTCCTCGCCGCTGGCATTACAATACTTCTAACAGACCGAAACCTAAACACTACATTCTTCGACCCTGCAGGAGGCGGAGACCCAATTTTATACCAACAC
>gi|197256445|gb|FJ028099.1|_Pipra_fasciicauda_voucher_MACN-Or-ct_2868_cytochrome_oxidase_subunit_1_(COI)_gene_partial_cds_mitochondrial
CTCTACCTTATTTTTGGTGCATGAGCTGGTATAATCGGCACAGCCCTAAGCCTTCTTATTCGAGCAGAATTAGGACAACCAGGAACCCTTTTAGGTGACGACCAAATCTATAATGTAATCGTCACCGCACATGCCTTTGTTATAATTTTCTTCATAGTAATACCCATTATAATCGGAGGGTTTGGTAACTGACTAGTTCCATTAATAATTGGTGCCCCCGACATAGCATTCCCCCGAATAAATAATATAAGCTTCTGACTTCTTCCCCCATCCTTTCTTCTACTCCTAGCATCCTCTACAGTAGAAGCCGGGGCTGGAACAGGGTGAACAGTATACCCACCCCTAGCTGGAAATCTAGCTCACGCAGGCGCATCAGTAGACCTCGCCATCTTCTCTCTTCACCTAGCAGGTGTCTCTTCCATTCTCGGAGCAATCAACTTTATCACTACGGCAATTAATATAAAACCACCTGCCCTTTCACAATACCAAACCCCTTTATTCGTTTGATCCGTCTTAATTACTGCAGTATTACTTCTCCTCTCTCTACCAGTCCTCGCCGCTGGCATTACAATACTTCTAACAGACCGAAACCTAAACACTACATTCTTCGACCCTGCAGGAGGCGGAGACCCAATTTTATACCAACAC
>gi|197256441|gb|FJ028097.1|_Pipraeidea_melanonota_voucher_MACN-Or-ct_918_cytochrome_oxidase_subunit_1_(COI)_gene_partial_cds_mitochondrial
CTATACCTAATCTTCGGCGCATGAGCCGGAATGGTAGGTACTGCCCTAAGCCTCCTCATTCGAGCAGAACTAGGTCAACCTGGAGCCCTCCTGGGAGACGATCAAGTATACAACGTAGTCGTCACAGCCCATGCTTTCGTAATAATTTTCTTCATAGTTATACCAATTATAATCGGAGGGTTCGGAAACTGACTAGTCCCCCTAATAATCGGAGCCCCAGATATAGCATTCCCACGAATAAACAATATAAGCTTCTGACTACTACCACCATCCTTCCTCCTTCTTCTAGCATCTTCCACAGTAGAAGCAGGTGCTGGTACAGGTTGAACAGTGTACCCCCCATTAGCTGGTAACCTAGCCCACGCTGGAGCCTCAGTCGACCTCGCAATCTTCTCCCTACATCTAGCTGGTATCTCTTCAATCCTAGGAGCAATCAACTTCATCACAACAGCCATCAACATAAAACCCCCTGCTCTCTCACAATACCAAACTCCCCTATTCGTCTGATCAGTACTAATCACCGCAGTCCTATTACTCCTATCTCTACCAGTTCTCGCTGCAGGAATCACAATACTCCTCACAGACCGCAACCTTAACACCACATTCTTCGATCCAGCTGGGGGAGGAGACCCTGTCCTATACCAACAC
>gi|197256437|gb|FJ028095.1|_Pionus_maximiliani_voucher_MACN-Or-cp_63_cytochrome_oxidase_subunit_1_(COI)_gene_partial_cds_mitochondrial
CTTTACNTAATCTTCGGCGCATGAGCAGGCATAATTGGCACCGCCCTGAGCCTANTTATCCGCGCAGAACTTGGCCAACCAGGGACTCTCCTTGGGGACGACCAAATCTATAACGTAATCGTCACAGCCCATGCCTTCGTAATAATCTTCTTCATAGTAATACCAATCATGATTGGGGGATTCGGAAACTGATTAGTCCCCCTCATAATCGGCGCCCCCGACATAGCATTCCCACGCATAAACAACATAAGCTTCTGACTACTCCCCCCATCTTTCCTTCTCCTACTAGCCTCCTCCACAGTAGAGGCAGGAGCGGGTACAGGATGAACTGTCTACCCCCCCCTAGCTGGCAACCTAGCCCACGCCGGAGCCTCAGTAGACCTGGCCATCTTTTCCCTCCACCTAGCTGGCGTATCTTCCATCCTAGGGGCAATTAACTTTATCACCACAGCCATCAACATAAAACCGCCCGCTCTGTCACAATACCAAACCCCACTATTCGTGTGATCCGTCCTAATCACAGCCGTACTACTACTGCTAGCACTACCAGTCCTAGCCGCCGGAATCACTATACTCCTTACAGACCGTAATCTAAACACAACATTCTTCGACCCTGCTGGAGGAGGAGACCCAATCCTATACCAACAC
>gi|197256433|gb|FJ028093.1|_Picumnus_temminckii_voucher_MACN-Or-ct_2038_cytochrome_oxidase_subunit_1_(COI)_gene_partial_cds_mitochondrial
CTATACCTTATCTTTGGAGCATGAGCCGGCATAATCGGCACAGCTCTAAGCCTCCTCATCCGCGCAGAACTAGGCCAACCAGGCACCCTGCTCGGCGACGACCAAATCTACAATGTAATCGTCACAGCCCACGCATTCGTAATAATCTTCTTCATAGTTATACCCATCATGATCGGAGGATTTGGAAACTGACTTGTCCCCCTAATAATTGGCGCCCCCGACATAGCATTCCCACGCATAAACAACATAAGCTTCTGACTCCTCCCCCCATCATTCCTACTCCTCCTAGCCTCATCCACAGTAGAAGCAGGAGCAGGAACAGGATGAACCGTCTACCCCCCTCTCGCCGGAAACCTAGCCCACGCAGGAGCCTCAGTAGACCTAGCAATTTTCTCACTCCACCTAGCAGGTATCTCATCAATCCTAGGAGCAATCAACTTTATTACAACAGCCATCAACATAAAACCACCAGCAATTTCACAATACCAAACCCCACTATTCGTCTGATCAGTCCTCATTACCGCCGTACTCCTCCTCCTATCACTCCCAGTCCTCGCTGCCGGCATCACCATACTCCTCACAGACCGCAACCTAAACACTACATTCTTTGACCCGGCCGGAGGGGGAGACCCAATCCTCTACCAACAC
>gi|197256429|gb|FJ028091.1|_Picumnus_cirratus_voucher_MACN-Or-ct_1372_cytochrome_oxidase_subunit_1_(COI)_gene_partial_cds_mitochondrial
CTATACCTTATCTTTGGAGCATGAGCCGGCATAATCGGCACAGCTCTAAGCCTCCTCATCCGCGCAGAACTAGGCCAACCAGGCACCCTGCTCGGCGACGACCAAATCTACAATGTAATCGTCACAGCCCACGCATTCGTAATAATCTTCTTCATAGTTATACCCATCATGATTGGAGGATTTGGAAACTGACTTGTCCCCCTAATAATCGGCGCCCCCGACATAGCATTCCCACGCATGAACAACATAAGCTTCTGACTCCTCCCCCCATCATTCCTACTCCTCCTAGCCTCATCCACAGTAGAAGCAGGGGCAGGGACAGGATGAACCGTCTACCCCCCTCTCGCCGGAAACCTAGCCCACGCAGGAGCCTCAGTAGACCTAGCCATTTTCTCACTCCACCTAGCAGGTATCTCATCAATTCTGGGAGCAATCAACTTTATTACAACAGCCATCAACATAAAACCACCAGCAATTTCACAGTACCAAACCCCACTATTCGTCTGATCAGTTCTCATTACCGCCGTACTCCTCCTCCTATCACTCCCAGTCCTCGCTGCCGGCATCACCATACTCCTCACAGACCGCAACCTGAACACTACATTCTTTGACCCAGCCGGAGGAGGAGACCCAATCCTCTACCAACAC
>gi|197256425|gb|FJ028089.1|_Picumnus_cirratus_voucher_MACN-Or-ct_719_cytochrome_oxidase_subunit_1_(COI)_gene_partial_cds_mitochondrial
CTATACCTTATCTTTGGAGCATGAGCCGGCATAATCGGCACAGCTCTAAGCCTCCTCATCCGCGCAGAACTAGGCCAACCAGGCACCCTGCTCGGCGACGACCAAATCTACAATGTAATCGTCACAGCCCACGCATTCGTAATAATCTTCTTCATAGTTATACCCATCATGATTGGAGGATTTGGAAACTGACTTGTCCCCCTAATAATCGGCGCCCCCGACATAGCATTCCCACGCATGAACAACATAAGCTTCTGACTCCTCCCCCCATCATTCCTACTCCTCCTAGCCTCATCCACAGTAGAAGCAGGGGCAGGGACAGGATGAACCGTCTACCCCCCTCTCGCCGGAAACCTAGCCCACGCAGGAGCCTCAGTAGACCTAGCCATTTTCTCACTCCACCTAGCAGGTATCTCATCAATTCTGGGAGCAATCAACTTTATTACAACAGCCATCAACATAAAACCACCAGCAATTTCACAGTACCAAACCCCACTATTCGTCTGATCAGTCCTCATTACCGCCGTACTCCTCCTCCTATCACTCCCAGTCCTCGCTGCCGGCATCACCATACTCCTCACAGACCGCAACCTGAACACTACATTCTTTGACCCAGCCGGAGGAGGAGACCCAATCCTCTACCAACAC
>gi|197256421|gb|FJ028087.1|_Picumnus_cirratus_voucher_MACN-Or-ct_886_cytochrome_oxidase_subunit_1_(COI)_gene_partial_cds_mitochondrial
----------TCTTTGGAGCATGAGCCGGCATAATCGGCACAGCTCTAAGCCTCCTCATCCGCGCAGAACTAGGCCAACCAGGCACCCTGCTCGGCGACGACCAAATCTACAATGTAATCGTCACAGCCCACGCATTCGTAATAATCTTCTTCATAGTTATACCCATCATGATTGGAGGATTTGGAAACTGACTTGTCCCCCTAATAATCGGCGCCCCCGACATAGCATTCCCACGCATGAACAACATAAGCTTCTGACTCCTCCCCCCATCATTCCTACTCCTCCTAGCCTCATCCACAGTAGAAGCAGGGGCAGGGACAGGATGAACCGTCTACCCCCCCCTCGCCGGAAACCTAGCCCACGCAGGAGCCTCAGTAGACCTAGCCATTTTCTCACTCCACCTAGCAGGTATCTCATCAATTCTGGGAGCAATCAACTTCATTACAACAGCCATCAACATAAAACCACCAGCAATTTCACAGTACCAAACCCCACTATTCGTCTGATCAGTTCTCATTACCGCCGTACTCCTCCTCCTATCACTCCCAGTCCTCGCTGCCGGCATCACCATACTCCTCACAGACCGCAACCTGAACACTACATTCTTTGACCCAGCCGGAGGAGGAGACCCAATCCTCTACCAACAC
>gi|197256417|gb|FJ028085.1|_Piculus_chrysochloros_voucher_MACN-Or-ct_1825_cytochrome_oxidase_subunit_1_(COI)_gene_partial_cds_mitochondrial
-------------TCGGCGCATGAGCTGGCATAATNGGCACAGCCCTCAGCCTTCNCNTCCGCGCTGAACTAGGCCAACCCGGCACCCTTCTCGGTGATGACCAAATTTACAACGTCATCGTCACCGCCCATGCATTCGTAATAATCTTCTTCATGGTCATACCCATCATGATCGGCGGATTTGGAAACTGACTCGTACCCCTCATAATTGGAGCTCCCGACATAGCATTCCCACGAATAAATAACATAAGCTTCTGACTCCTACCACCATCATTCCTACTCCTCCTAGCCTCCTCCACCGTGGAGGCGGGGGCAGGAACAGGATGAACTGTCTACCCCCCCCTTGCCGGCAACTTAGCCCACGCAGGAGCTTCAGTAGACCTGGCCATCTTCTCCCTCCACCTAGCAGGTATCTCATCTATCCTGGGAGCAATCAACTTTATCACCACAGCCATCAACATAAAGCCCCCTGCCATCTCACAATACCAAACCCCCTTATTCGTCTGATCCGTCCTCATCACTGCCGTCCTTCTCCTCCTATCCCTCCCGGTCCTCGCTGCCGGTATTACGATGCTTCTCACAGACCGCAACCTAAACACCTCATTCTTCGACCCTGCCGGAGGGGGCGACCCAATCCTCTACCAACAC
>gi|197256413|gb|FJ028083.1|_Picoides_mixtus_voucher_MACN-Or-ct_2376_cytochrome_oxidase_subunit_1_(COI)_gene_partial_cds_mitochondrial
CTATATCTCATCTTCGGCGCATGAGCTGGCATAATCGGCACAGCCCTTAGCCTCCTCATTCGGGCAGAACTAGGCCAACCTGGCACCCTCCTCGGCGACGACCAGATCTATAACGTCATTGTCACCGCCCATGCATTCGTGATAATCTTCTTCATGGTCATACCCATTATAATCGGAGGGTTCGGAAACTGACTCGTACCACTCATAATCGGGGCCCCCGATATAGCATTCCCACGAATGAACAATATAAGCTTTTGACTTCTCCCCCCATCATTCCTTCTCCTCCTGGCCTCCTCCACAGTGGAAGCAGGAGCTGGAACAGGATGAACTGTCTATCCACCTCTTGCTGGCAACTTAGCCCACGCGGGAGCCTCAGTAGACTTGGCTATCTTCTCACTTCACTTAGCAGGCATCTCATCAATCCTAGGAGCAATCAACTTCATTACAACAGCCATTAACATGAAACCCCCAGCCATCTCACAGTATCAAACCCCCCTATTCGTCTGATCCGTTCTTATCACCGCTGTCCTCCTACTCCTATCACTCCCCGTACTCGCTGCTGGTATTACAATACTCCTCACAGACCGCAATCTAAACACCACATTCTTCGACCCTGCTGGAGGAGGAGACCCTATCCTCTACCAACAC
>gi|197256409|gb|FJ028081.1|_Picoides_mixtus_voucher_MACN-Or-ct_3268_cytochrome_oxidase_subunit_1_(COI)_gene_partial_cds_mitochondrial
CTATATNTCATNTTCGGCGCATGAGCTGGCATAATCGGCACAGCCCTTAGCCTCCTCATTCGGGCAGAACTAGGCCAACCTGGCACCCTCCTCGGCGACGACCAGATCTATAACGTCATTGTCACCGCCCATGCATTCGTGATAATCTTCTTCATGGTCATACCCATTATAATCGGAGGGTTCGGAAACTGACTCGTACCACTCATAATCGGGGCCCCCGATATAGCATTCCCACGAATGAACAATATAAGCTTCTGACTTCTCCCCCCATCATTCCTTCTCCTCCTGGCCTCCTCCACAGTGGAAGCAGGAGCTGGAACAGGATGAACTGTCTATCCACCTCTTGCTGGCAACTTAGCCCACGCGGGAGCCTCAGTAGACTTGGCTATCTTCTCACTTCACTTAGCAGGCATCTCATCAATCCTAGGAGCAATCAACTTCATTACAACAGCCATTAACATGAAACCCCCAGCCATCTCACAGTATCAAACCCCCCTATTCGTCTGATCCGTTCTTATCACCGCTGTCCTCCTACTCCTATCACTCCCCGTACTCGCTGCTGGTATTACAATACTCCTCACAGACCGCAATCTAAACACCACATTCTTCGACCCTGCTGGAGGAGGAGACCCTATCCTCTACCAACAC
>gi|197256405|gb|FJ028079.1|_Picoides_mixtus_voucher_MACN-Or-ct_2116_cytochrome_oxidase_subunit_1_(COI)_gene_partial_cds_mitochondrial
------------TTCGGCGCATGAGCTGGCATAATCGGCACAGCCCTTAGCCTCCTCATTCGGGCAGAACTAGGCCAACCTGGCACCCTCCTCGGCGACGACCAGATCTATAACGTCATTGTCACCGCCCATGCATTCGTGATAATCTTCTTCATGGTCATACCCATTATAATCGGAGGGTTCGGAAACTGACTCGTACCACTCATAATCGGGGCCCCCGATATAGCATTCCCACGAATGAACAATATAAGCTTTTGACTTCTCCCCCCATCATTCCTTCTCCTCCTGGCCTCCTCCACAGTGGAAGCAGGAGCTGGAACAGGATGAACTGTCTATCCACCCCTTGCTGGCAACTTAGCCCACGCGGGAGCCTCAGTAGACTTGGCTATCTTCTCACTTCACTTAGCAGGCATCTCATCAATCCTAGGAGCAATCAACTTCATTACAACAGCCATTAACATGAAACCCCCAGCCATCTCACAGTATCAAACCCCCCTATTCGTCTGATCCGTCCTTATCACCGCTGTCCTCCTACTCCTATCACTCCCCGTACTCGCTGCTGGTATTACAATACTCCTCACAGACCGCAATCTAAACACCACATTCTTCGACCCTGCTGGAGGAGGAGACCCTATCCTCTACCAACAC
>gi|197256401|gb|FJ028077.1|_Picoides_lignarius_voucher_MACN-Or-ct_2611_cytochrome_oxidase_subunit_1_(COI)_gene_partial_cds_mitochondrial
CTATATCTCATCTTCGGCGCATGAGCTGGCATAATCGGCACAGCCCTTAGCCTCCTCATTCGGGCAGAACTAGGCCAACCCGGCACCCTCCTCGGCGACGACCAGATCTATAACGTCATCGTCACCGCCCATGCATTCGTGATAATTTTCTTCATGGTCATACCCATTATAATCGGAGGGTTCGGAAACTGACTCGTACCACTCATAATCGGAGCCCCCGATATAGCATTCCCACGAATGAACAATATAAGCTTCTGACTTCTCCCCCCATCATTCCTTCTCCTCCTGGCCTCCTCCACAGTAGAAGCAGGAGCTGGAACAGGATGAACTGTCTACCCACCCCTTGCTGGCAACTTAGCCCACGCGGGAGCCTCAGTAGACTTGGCTATCTTCTCACTTCACTTAGCAGGCATCTCATCAATCCTAGGAGCAATCAACTTCATTACAACAGCCATTAACATGAAACCCCCAGCCATCTCACAATATCAAACTCCCCTATTCGTCTGATCCGTTCTTATCACCGCCGTCCTCCTACTCCTATCACTCCCCGTACTTGCCGCTGGTATTACAATACTCCTCACAGACCGCAATCTAAACACCACATTCTTCGACCCTGCTGGAGGAGGAGACCCCATCCTCTACCAACAC
>gi|197256397|gb|FJ028075.1|_Piaya_cayana_voucher_MACN-Or-ct_1586_cytochrome_oxidase_subunit_1_(COI)_gene_partial_cds_mitochondrial
CTATACCTTATCTTCGGTGCTTGAGCCGGCATGGTAGGAACAGCCCTAAGCCTACTCATCCGTGCAGAACTCGGACAGCCAGGAACCCTACTAGGAGACGACCAAATCTACAATGTAATCGTCACCGCACATGCCTTCGTAATAATCTTCTTCATAGTCATACCAATCATAATCGGAGGATTCGGAAACTGACTTGTCCCACTTATAATTGGGGCCCCCGACATAGCATTCCCACGTATAAATAACATGAGCTTTTGACTCCTTCCCCCTTCCTTTCTCCTACTACTAGCATCATCTACAGTAGAAGCAGGGGCAGGAACCGGATGAACCGTATACCCACCACTAGCTGGAAACTTAGCCCATGCCGGAGCTTCAGTAGACCTCGCTATTTTTTCACTTCACCTAGCAGGTATCTCATCAATCCTCGGGGCAATCAACTTCATTACAACAGCTATTAACATAAAACCCCCAGCCCTATCCCAATACCAAACTCCTCTGTTCGTGTGATCAGTACTCATTACCGCTGTCCTACTTTTATTATCCCTACCAGTCCTCGCCGCCGGTATTACTATGCTACTAACAGACCGCAACCTAAATACCACATTCTTCGACCCTGCTGGAGGAGGTGACCCAGTTCTATATCAACAC
>gi|197256393|gb|FJ028073.1|_Piaya_cayana_voucher_MACN-Or-ct_1365_cytochrome_oxidase_subunit_1_(COI)_gene_partial_cds_mitochondrial
CTATACCTTATCTTCGGTGCTTGAGCCGGCATGGTAGGAACAGCCCTAAGCCTACTCATCCGTGCAGAACTCGGACAGCCAGGAACCCTACTAGGAGACGACCAAATCTACAATGTAATCGTCACCGCACATGCCTTCGTAATAATCTTCTTCATAGTCATACCAATCATAATCGGAGGATTCGGAAACTGACTTGTCCCACTTATAATTGGAGCCCCCGACATAGCATTCCCACGTATAAATAATATGAGCTTTTGACTCCTCCCCCCTTCCTTTCTCCTACTACTAGCATCATCTACAGTAGAAGCAGGGGCAGGAACCGGATGAACCGTATACCCACCACTAGCTGGAAACCTAGCCCATGCCGGAGCTTCAGTAGACCTCGCTATTTTTTCACTTCACCTAGCAGGTATCTCATCAATCCTTGGGGCAATCAACTTCATTACAACAGCTATTAACATGAAACCTCCAGCCCTATCCCAATACCAAACTCCCCTGTTCGTGTGATCAGTACTCATTACCGCTGTCCTACTTTTATTATCCCTACCAGTCCTCGCCGCCGGTATTACTATACTACTAACAGACCGCAACCTAAATACCACATTCTTCGACCCTGCTGGAGGAGGTGACCCAGTTCTATATCAACAC
>gi|197256389|gb|FJ028071.1|_Phytotoma_rutila_voucher_MACN-Or-ct_2189_cytochrome_oxidase_subunit_1_(COI)_gene_partial_cds_mitochondrial
CTCTACTTAATTTTCGGCGCCTGAGCTGGTATAATTGGCACAGCCCTAAGCCTCCTTATCCGAGCGGAACTTGGGCAACCTGGAACCCTCCTAGGAGACGACCAAATCTACAATGTAATCGTTACCGCTCATGCCTTCGTAATAATCTTTTTTATAGTAATACCAATCATAATCGGAGGCTTTGGCAACTGATTAGTTCCCCTAATAATCGGAGCCCCAGACATAGCATTCCCACGTATAAACAATATAAGTTTCTGACTTCTCCCACCATCCTTTCTACTTCTATTAGCCTCTTCCACAGTAGAAGCAGGAGTAGGTACAGGATGAACTGTTTACCCACCACTAGCCGGCAACCTAGCACACGCCGGAGCCTCCGTAGACCTAGCCATCTTCTCACTCCACCTAGCTGGTGTTTCTTCAATTCTAGGCGCAATTAACTTCATCACCACCGCAATCAATATAAAACCCCCAGCCCTATCCCAGTACCAAACTCCCCTATTTGTCTGATCTGTCCTAATCACCGCCGTCCTACTCCTTCTCTCCCTCCCAGTCCTCGCCGCTGGCATTACCATGCTCTTAACAGACCGCAACCTAAACACTACATTCTTCGACCCAGCAGGAGGAGGAGATCCTATCCTATATCAACAT
>gi|197256385|gb|FJ028069.1|_Phytotoma_rutila_voucher_MACN-Or-ct_015_cytochrome_oxidase_subunit_1_(COI)_gene_partial_cds_mitochondrial
CTCTACTTAATTTTCGGCGCCTGAGCTGGTATAATTTGCACAGCCCTAAGCCTCCTTATCCGAGCGGAACTTGGGCAACCTGGAACCCTCCTAGGAGACGACCAAATCTACAATGTAATCGTTACCGCTCATGCCTTCGTAATAATCTTTTTTATAGTAATACCAATCATAATCGGAGGCTTTGGCAACTGATTAGTCCCCCTAATAATCGGAGCCCCAGACATAGCATTCCCACGTATAAACAATATAAGTTTCTGACTTCTCCCACCATCCTTTCTACTTCTATTAGCCTCTTCCACAGTAGAAGCAGGAGTAGGTACAGGATGAACTGTTTACCCACCACTAGCCGGCAACCTAGCACACGCCGGAGCCTCCGTAGACCTAGCCATCTTCTCACTCCACCTAGCTGGTGTTTCTTCAATTCTAGGCGCAATTAACTTCATCACCACCGCAATCAATATAAAACCCCCAGCCCTATCCCAGTACCAAACTCCCCTATTTGTCTGATCTGTCCTAATCACCGCCGTCCTACTCCTTCTCTCCCTCCCAGTCCTCGCCGCTGGCATTACCATGCTCTTAACAGACCGCAACCTAAACACTACATTCTTCGACCCAGCAGGAGGAGGAGATCCTATCCTATATCAACAT
>gi|197256381|gb|FJ028067.1|_Phytotoma_rutila_voucher_MACN-Or-ct_2780_cytochrome_oxidase_subunit_1_(COI)_gene_partial_cds_mitochondrial
CTCTACTTAATTTTCGGCGCCTGAGCTGGTATAATTGGCACAGCCCTAAGCCTCCTTATCCGAGCGGAACTTGGGCAACCTGGAACCCTCCTAGGAGACGACCAAATCTACAATGTAATCGTTACCGCTCATGCCTTCGTAATAATCTTTTTTATAGTAATACCAATCATAATCGGAGGCTTTGGCAACTGATTAGTTCCCCTAATAATCGGAGCCCCAGACATAGCATTCCCACGTATAAACAATATAAGTTTCTGACTTCTCCCACCATCCTTTCTACTTCTATTAGCCTCTTCCACAGTAGAAGCAGGAGTAGGTACAGGATGAACTGTTTACCCACCACTAGCCGGCAACCTAGCACACGCCGGAGCCTCCGTAGACCTAGCCATCTTCTCACTCCACCTAGCTGGTGTTTCTTCAATTCTAGGCGCAATTAACTTCATCACCACCGCAATCAATATAAAACCCCCAGCCCTATCCCAGTACCAAACTCCCCTATTTGTCTGATCTGTCCTAATCACCGCCGTCCTACTCCTTCTCTCCCTCCCAGTCCTCGCCGCTGGCATTACCATGCTCTTAACAGACCGCAACCTAAACACTACATTCTTCGACCCAGCAGGAGGAGGAGATCCTATCCTATATCAACAT
>gi|197256377|gb|FJ028065.1|_Phytotoma_rara_voucher_MACN-Or-ct_2677_cytochrome_oxidase_subunit_1_(COI)_gene_partial_cds_mitochondrial
-------TAATTTTTGGCGCNTGAGCCGGGATAATTGGTACAGCCCTAAGCCTTCTTATTCGAGCAGAACTCGGACAACCAGGAACCCTCCTAGGAGACGACCAAATCTACAACGTAATCGTCACCGCTCATGCCTTCGTAATAATCTTCTTCATAGTCATACCTATCATGATCGGGGGCTTTGGTAACTGATTGGTCCCCCTAATAATTGGAGCCCCAGACATAGCATTCCCACGTATGAACAACATAAGCTTCTGACTCCTCCCACCATCCTTCTTACTCCTACTAGCCTCTTCCACAGTAGAAGCAGGAGTAGGCACAGGATGAACTGTATACCCACCACTAGCCGGTAATCTAGCCCATGCTGGAGCCTCCGTAGACCTAGCTATCTTTTCACTCCACCTAGCTGGTGTCTCCTCAATTCTAGGGGCAATCAACTTCATCACCACCGCAATCAACATAAAACCACCAGCCCTATCTCAATACCAAACCCCCTTATTTGTTTGATCTGTCTTAATCACTGCCGTCCTACTCCTTCTCTCCCTCCCAGTCCTTGCTGCTGGCATTACTATGCTCCTAACAGACCGCAACCTAAACACTACATTCTTCGACCCAGCAGGAGGAGGGGACCCCATCCTATATCAACAT
>gi|197256373|gb|FJ028063.1|_Phytotoma_rara_voucher_MACN-Or-ct_2643_cytochrome_oxidase_subunit_1_(COI)_gene_partial_cds_mitochondrial
CTCTATCTAATTTTTGGCGCTTGAGCCGGGATAATTGGTACAGCCCTAAGCCTTCTTATTCGAGCAGAACTCGGACAACCAGGAACCCTCCTAGGAGACGACCAAATCTACAACGTAATCGTCACCGCTCATGCCTTCGTAATAATCTTCTTCATAGTCATACCTATCATGATCGGGGGCTTTGGTAACTGATTGGTCCCCCTAATAATTGGAGCCCCAGACATAGCATTCCCACGTATGAACAACATAAGCTTCTGACTCCTCCCACCATCCTTCTTACTCCTACTAGCCTCTTCCACAGTAGAAGCAGGAGTAGGCACAGGATGAACTGTATACCCACCACTAGCCGGTAATCTAGCCCATGCTGGAGCCTCCGTAGACCTAGCTATCTTTTCACTCCACCTAGCTGGTGTCTCCTCAATTCTAGGGGCAATCAACTTCATCACCACCGCAATCAACATAAAACCACCAGCCCTATCTCAATACCAAACCCCCTTATTTGTTTGATCTGTCTTAATCACTGCCGTCCTACTCCTTCTCTCCCTCCCAGTCCTTGCTGCTGGCATTACTATGCTCCTAACAGACCGCAACCTAAACACTACATTCTTCGACCCAGCAGGAGGAGGGGACCCCATCCTATATCAACAT
>gi|197256369|gb|FJ028061.1|_Phylloscartes_ventralis_voucher_MACN-Or-ct_769_cytochrome_oxidase_subunit_1_(COI)_gene_partial_cds_mitochondrial
CTTTACCTAATCTTTGGAGCTTGAGCCGGCATAATCGGCACCGCCCTAAGTCTCCTTATTCGAGCAGAACTTGGCCAGCCCGGAACCCTCCTAGGTGATGACCAAATCTACAACGTAATCGTCACTGCTCATGCATTCGTAATAATTTTCTTTATAGTAATGCCCATTATAATTGGAGGTTTCGGTAATTGACTAGTTCCTCTAATAATTGGTGCTCCTGACATAGCATTCCCACGCATAAACAACATAAGCTTCTGACTTTTACCCCCCTCATTCCTACTCCTCTTAGCCTCCTCCACAGTAGAAGCTGGGGTGGGTACAGGATGAACCGTATATCCACCACTAGCTGGCAACCTCGCCCACGCCGGAGCCTCAGTAGACTTAGCTATCTTCTCCCTCCACCTAGCAGGTGTCTCTTCCATCCTTGGTGCTATCAACTTCATCACCACAGCAATTAACATAAAACCACCCGCCCTTTCACAATACCAAACCCCCCTGTTCGTATGATCCGTACTAATCACAGCAGTACTTCTCCTCCTATCCCTACCAGTTCTAGCCGCTGGCATTACTATACTCTTAACAGATCGTAACCTAAACACCACATTCTTCGACCCAGCAGGAGGCGGAGACCCAGTCTTATATCAACAC
>gi|197256365|gb|FJ028059.1|_Phyllomyias_sclateri_voucher_MACN-Or-ct_896_cytochrome_oxidase_subunit_1_(COI)_gene_partial_cds_mitochondrial
CTTTACTTAATTTTTGGCGCCTGGGCCGGCATGATTGGCACCGCCCTAAGCCTCCTCATCCGAGCGGAACTTGGACAACCAGGGACTCTCCTAGGAGACGATCAAATCTACAATGTAATCGTTACTGCCCATGCCTTCGTAATAATCTTTTTTATAGTAATACCCATCATAATTGGAGGATTCGGCAACTGACTAGTACCCCTAATAATTGGTGCTCCTGACATAGCATTCCCACGTATAAATAATATAAGCTTCTGACTACTCCCCCCATCATTTCTCCTCCTCTTAGCCTCATCTACAGTAGAAGCCGGCGTAGGGACTGGATGAACTGTCTATCCACCATTAGCCGGCAATCTAGCCCATGCTGGAGCCTCAGTAGACCTAGCTATCTTCTCCCTTCACCTCGCAGGTATTTCCTCAATCTTAGGAGCTATCAACTTTATCACAACCGCAATCAACATAAAACCACCAGCTCTCTCACAATACCAAACTCCCTTATTTGTATGATCTGTCCTAATTACTGCAGTCCTCCTACTTCTATCACTCCCAGTCCTAGCTGCTGGCATCACCATGCTCTTAACAGACCGAAACCTTAACACTACATTCTTTGACCCCGCAGGAGGCGGAGACCCAGTACTATACCAACAC
>gi|197256361|gb|FJ028057.1|_Phrygilus_unicolor_voucher_MACN-Or-ct_1302_cytochrome_oxidase_subunit_1_(COI)_gene_partial_cds_mitochondrial
CTGTACCTAATCTTCGGCGCATGAGCCGGAATAGTAGGTACAGCCCTAAGCCTCCTTATCCGAGCAGAATTAGGCCAACCTGGGGCCCTCCTAGGAGACGACCAAGTCTACAACGTAGTCGTCACAGCCCATGCTTTCGTCATAATTTTCTTCATAGTTATACCAATTATAATCGGAGGATTCGGAAACTGACTAGTTCCCCTAATAATCGGAGCTCCGGACATAGCATTCCCACGAATAAACAACATAAGCTTCTGGCTACTCCCCCCATCCTTCCTCTTACTCCTAGCGTCCTCTACAGTCGAAGCGGGCGTCGGCACAGGCTGAACAGTATATCCCCCTCTAGCTGGTAATCTTGCCCACGCCGGAGCCTCCGTCGACTTAGCAATTTTCTCCCTACACCTAGCTGGTATCTCCTCAATCCTAGGAGCAATTAATTTCATTACAACAGCAATCAACATAAAACCCCCTGCCCTCTCACAATACCAAACTCCCCTATTCGTCTGATCAGTCCTAATCACTGCAGTCCTACTACTCCTATCCCTCCCAGTTCTAGCCGCAGGAATCACAATGCTTCTCACAGATCGCAACCTTAATACTACATTCTTTGATCCCGCTGGAGGAGGAGACCCCGTCCTATATCAGCAT
>gi|197256357|gb|FJ028055.1|_Phrygilus_plebejus_voucher_MACN-Or-ct_1089_cytochrome_oxidase_subunit_1_(COI)_gene_partial_cds_mitochondrial
CTGTACCTAATCTTCGGCGCATGAGCCGGAATAGTAGGTACAGCCCTAAGCCTCCTTATCCGAGCAGAGTTAGGCCAACCTGGAGCCCTTCTAGGAGACGACCAAGTCTACAACGTAGTCGTCACAGCCCATGCTTTCGTCATAATCTTCTTCATAGTTATACCAATTATAATCGGAGGATTCGGAAACTGACTAGTTCCCCTAATAATCGGAGCTCCGGATATAGCATTCCCACGAATAAACAATATAAGCTTCTGGCTACTCCCCCCATCCTTCCTCCTACTCCTAGCGTCCTCTACAGTTGAAGCGGGCGTCGGCACAGGCTGAACAGTATACCCCCCTCTAGCCGGTAATCTTGCCCACGCCGGAGCCTCCGTTGACTTAGCAATCTTCTCCCTACACCTAGCCGGTATCTCCTCAATCCTAGGAGCAATTAACTTCATTACAACAGCAATCAACATAAAACCTCCTGCCCTCTCACAATACCAAACTCCTCTATTCGTCTGATCAGTCCTAATCACTGCAGTCTTACTACTCCTATCTCTCCCAGTCCTAGCTGCAGGAATCACAATGCTCCTCACAGATCGCAACCTTAATACTACATTTTTCGACCCCGCCGGAGGAGGAGACCCTGTCCTGTATCAACAC
>gi|197256353|gb|FJ028053.1|_Phrygilus_plebejus_voucher_MACN-Or-ct_1069_cytochrome_oxidase_subunit_1_(COI)_gene_partial_cds_mitochondrial
CTGTACNTAATCTTCGGCGCATGAGCCGGAATAGTAGGTACAGCCCTAAGCCTCCTTATCCGAGCAGAGTTAGGCCAACCTGGAGCCCTTCTAGGAGACGACCAAGTCTACAACGTAGTCGTCACAGCCCATGCTTTCGTCATAATCTTCTTCATAGTTATACCAATTATAATCGGAGGATTCGGAAACTGACTAGTTCCCCTAATAATCGGAGCTCCGGATATAGCATTCCCACGAATAAACAATATAAGCTTCTGGCTACTCCCCCCATCCTTCCTCCTACTCCTAGCGTCCTCTACAGTTGAAGCGGGCGTCGGCACAGGCTGAACAGTATACCCCCCTCTAGCCGGTAATCTTGCCCACGCCGGAGCCTCCGTTGACTTAGCAATCTTCTCCCTACACCTAGCCGGTATCTCCTCAATCCTAGGAGCAATTAACTTCATTACAACAGCAATCAACATAAAACCTCCTGCCCTCTCACAATACCAAACTCCTCTATTCGTCTGATCAGTCCTAATCACTGCAGTCTTACTACTCCTATCTCTCCCAGTCCTAGCTGCAGGAATCACAATGCTCCTCACAGATCGCAACCTTAATACTACATTTTTCGACCCCGCCGGAGGAGGAGACCCTGTCCTGTATCAACAC
>gi|197256349|gb|FJ028051.1|_Phrygilus_patagonicus_voucher_MACN-Or-ct_617_cytochrome_oxidase_subunit_1_(COI)_gene_partial_cds_mitochondrial
CTGTACCTAATCTTCGGCGCATGAGCCGGAATAGTAGGTACTGCCCTAAGCCTCCTTATTCGAGCAGAACTGGGCCAACCTGGAGCTCTTCTAGGGGACGACCAAGTATATAACGTAGTCGTCACGGCCCATGCCTTCGTAATAATCTTCTTCATAGTGATACCAATTATAATTGGAGGGTTTGGAAACTGACTAGTACCCCTAATAATTGGAGCCCCAGACATAGCATTCCCACGAATAAACAATATAAGCTTCTGGCTACTTCCCCCATCCTTCCTCCTCCTCCTAGCATCCTCCACAGTCGAAGCAGGCGTAGGCACGGGTTGAACAGTCTACCCTCCCCTGGCCGGCAACTTAGCCCACGCCGGGGCCTCTGTTGACCTAGCAATCTTCTCCCTACATCTAGCCGGCATCTCCTCAATCCTAGGAGCAATCAACTTCATTACAACAGCAATCAACATAAAACCTCCCGCCCTCTCACAATACCAAACCCCTCTATTCGTCTGATCCGTCCTAATCACCGCCGTCCTACTGCTTCTTTCCCTTCCAGTCCTTGCTGCAGGAATTACTATACTTCTCACAGACCGCAACCTCAACACCACATTCTTTGATCCTGCCGGAGGAGGAGACCCCATCCTATATCAACAT
>gi|197256345|gb|FJ028049.1|_Phrygilus_gayi_voucher_MACN-Or-ct_1325_cytochrome_oxidase_subunit_1_(COI)_gene_partial_cds_mitochondrial
CTGTACCTAATCTTCGGCGCATGAGCCGGAATAGTAGGTACTGCCCTAAGCCTCCTTATCCGAGCAGAACTGGGCCAACCCGGAGCCCTTCTAGGAGACGACCAAGTATATAACGTAGTCGTCACGGCCCATGCTTTCGTAATAATCTTCTTCATAGTGATACCAATTATAATTGGGGGATTTGGGAACTGACTAGTCCCCCTAATAATTGGGGCCCCAGACATAGCATTCCCACGAATAAACAATATAAGCTTCTGGCTACTTCCCCCATCTTTCCTCCTCCTCCTAGCATCCTCTACAGTCGAAGCAGGCGTAGGCACAGGCTGAACAGTCTACCCTCCCCTGGCCGGCAACTTAGCCCACGCCGGGGCCTCTGTTGACCTAGCAATCTTCTCCCTACACCTAGCCGGTATCTCCTCAATCCTAGGAGCAATCAACTTCATTACAACAGCAATCAACATAAAACCTCCCGCCCTCTCACAATACCAAACCCCCCTATTTGTCTGATCCGTCCTAATCACCGCCGTCCTACTACTTCTTTCCCTCCCAGTCCTCGCTGCAGGAATTACCATACTTCTCACAGACCGTAACCTCAACACTACATTCTTTGACCCTGCTGGAGGAGGAGACCCCATCCTATACCAGCAT
>gi|197256341|gb|FJ028047.1|_Phrygilus_gayi_voucher_MACN-Or-ct_1018_cytochrome_oxidase_subunit_1_(COI)_gene_partial_cds_mitochondrial
CTGTACCTAATCTTCGGCGCATGAGCCGGAATAGTAGGTACTGCCCTAAGCCTCCTTATCCGAGCAGAACTGGGCCAACCCGGAGCCCTTCTAGGAGACGACCAAGTATATAACGTAGTCGTCACGGCCCATGCTTTCGTAATAATCTTCTTCATAGTGATACCAATTATAATTGGGGGATTTGGGAATTGACTAGTCCCCCTAATAATTGGGGCCCCAGACATAGCATTCCCACGAATAAACAATATAAGCTTCTGGCTACTTCCCCCATCTTTCCTCCTCCTCCTAGCATCCTCTACAGTCGAAGCAGGCGTAGGCACAGGCTGAACAGTCTACCCTCCCCTGGCCGGCAACTTAGCCCACGCCGGGGCCTCTGTTGACCTAGCAATCTTCTCCCTACACCTAGCCGGTATCTCCTCAATCCTAGGAGCAATCAACTTCATTACAACAGCAATCAACATAAAACCTCCCGCCCTCTCACAATACCAAACCCCCCTATTTGTCTGATCCGTCCTAATCACCGCCGTCCTACTACTTCTTTCCCTTCCAGTCCTCGCTGCAGGAATTACCATGCTTCTCACAGACCGTAACCTCAACACTACATTCTTTGACCCTGCTGGAGGAGGAGACCCCATCCTATACCAGCAT
>gi|197256337|gb|FJ028045.1|_Phrygilus_fruticeti_voucher_MACN-Or-ct_662_cytochrome_oxidase_subunit_1_(COI)_gene_partial_cds_mitochondrial
CTGTACCTAATCTTCGGCGCATGAGCCGGAATAGTAGGGACAGCCCTAAGCCTCCTCATCCGAGCAGAACTAGGCCAACCTGGGGCTCTCCTAGGAGACGACCAAGTCTACAACGTAGTTGTCACGGCCCATGCCTTCGTAATAATCTTCTTCATAGTTATGCCAATTATAATCGGAGGATTTGGAAACTGACTTGTCCCCCTAATAATTGGAGCCCCAGACATAGCATTCCCACGAATAAATAACATAAGCTTCTGACTACTCCCCCCATCCTTCCTCCTCCTCCTAGCATCTTCCACAGTTGAAGCAGGCGCAGGTACTGGATGAACCGTATATCCCCCACTAGCAGGCAACCTGGCCCACGCCGGAGCCTCAGTTGACCTAGCTATCTTCTCCCTACATCTAGCCGGCATCTCCTCAATTCTAGGGGCAATCAACTTCATCACAACCGCAGTCAACATAAAACCCCCTGCCCTCTCACAATACCAAACCCCCCTATTCGTATGATCCGTCCTAATCACTGCAGTACTATTACTCCTATCCCTTCCAGTCCTTGCTGCAGGAATCACAATACTCCTCACAGATCGCAACCTTAACACCACCTTCTTTGACCCTGCCGGAGGAGGAGACCCGGTCCTGTACCAACAC
>gi|197256333|gb|FJ028043.1|_Phrygilus_fruticeti_voucher_MACN-Or-ct_876_cytochrome_oxidase_subunit_1_(COI)_gene_partial_cds_mitochondrial
CTGTACCTAATCTTCGGCGCATGAGCCGGAATAGTAGGGACAGCCCTAAGCCTCCTCATCCGAGCAGAACTAGGCCAACCTGGGGCTCTCCTAGGAGACGACCAAGTCTACAACGTAGTTGTCACGGCCCATGCCTTCGTAATAATCTTCTTCATAGTTATGCCAATTATAATCGGAGGATTTGGAAACTGACTTGTCCCCCTAATAATTGGAGCCCCAGACATAGCATTCCCACGAATAAATAACATAAGCTTCTGACTACTCCCCCCATCCTTCCTCCTCCTCCTAGCATCTTCCACAGTTGAAGCAGGCGCAGGTACTGGATGAACCGTATATCCCCCACTAGCAGGCAACCTGGCCCACGCCGGAGCCTCAGTTGACCTAGCTATCTTCTCCCTACATCTAGCCGGCATCTCCTCAATTCTAGGGGCAATCAACTTCATCACAACCGCAGTCAACATAAAACCCCCTGCCCTCTCACAATACCAAACCCCCCTATTCGTATGATCCGTCCTAATCACTGCAGTACTATTACTCCTATCCCTTCCAGTCCTTGCTGCAGGAATCACAATACTCCTCACAGATCGCAACCTTAACACCACCTTCTTTGACCCTGCCGGAGGAGGAGACCCGGTCCTGTACCAACAC
>gi|197256329|gb|FJ028041.1|_Phrygilus_carbonarius_voucher_MACN-Or-ct_2732_cytochrome_oxidase_subunit_1_(COI)_gene_partial_cds_mitochondrial
CTGTACCTGATCTTCGGCGCATGAGCCGGGATAGTAGGAACAGCCCTAAGCCTCCTCATCCGAGCAGAACTAGGCCAACCTGGAGCCCTCCTGGGAGACGACCAAGTCTACAACGTAGTCGTCACGGCCCATGCTTTTGTAATAATCTTCTTCATAGTTATACCAATTATGATTGGAGGATTCGGAAACTGACTAGTCCCTCTAATAATTGGAGCCCCAGACATAGCATTCCCACGAATAAACAACATAAGCTTCTGGCTGCTACCCCCATCCTTCCTCCTCCTCCTAGCATCCTCTACAGTCGAAGCGGGCGTAGGCACCGGATGAACCGTATACCCTCCATTAGCAGGCAATCTAGCCCACGCCGGAGCCTCAGTTGATCTGGCAATCTTCTCCCTACACCTAGCCGGCATCTCTTCAATTCTAGGGGCAATCAACTTCATCACAACCGCAGTCAACATAAAACCTCCTGCCCTCTCACAATATCAAACCCCCCTATTTGTTTGATCAGTCCTAATCACCGCAGTGCTATTACTACTATCCCTCCCAGTCCTTGCCGCAGGAATTACAATGCTCCTCACAGACCGCAACCTTAACACCACCTTTTTCGACCCGGCCGGGGGAGGAGACCCTGTCCTATACCAGCAC
>gi|197256325|gb|FJ028039.1|_Phrygilus_carbonarius_voucher_MACN-Or-ct_2738_cytochrome_oxidase_subunit_1_(COI)_gene_partial_cds_mitochondrial
CTGTACCTGATCTTCGGCGCATGAGCCGGGATAGTAGGAACAGCCCTAAGCCTCCTCATCCGAGCAGAACTAGGCCAACCTGGAGCCCTCCTGGGAGACGACCAAGTCTACAACGTAGTCGTCACGGCCCATGCTTTTGTAATAATCTTCTTCATAGTTATACCAATTATGATTGGAGGATTCGGAAACTGACTAGTCCCTCTAATAATTGGAGCCCCAGACATAGCATTCCCACGAATAAACAACATAAGCTTCTGGCTGCTACCCCCATCCTTCCTCCTCCTCCTAGCATCCTCTACAGTCGAAGCGGGCGTAGGCACCGGATGAACCGTATACCCTCCATTAGCAGGCAATCTAGCCCACGCCGGAGCCTCAGTTGATCTGGCAATCTTCTCCCTACACCTAGCCGGCATCTCTTCAATTCTAGGGGCAATCAACTTCATCACAACCGCAGTCAACATAAAACCTCCTGCCCTCTCACAATATCAAACCCCCCTATTTGTTTGATCAGTCCTAATCACCGCAGTGCTATTACTACTATCCCTCCCAGTCCTTGCCGCAGGAATTACAATGCTCCTCACAGACCGCAACCTTAACACCACCTTTTTCGACCCGGCCGGGGGAGGAGACCCTGTCCTATACCAGCAC
>gi|197256321|gb|FJ028037.1|_Phrygilus_atriceps_voucher_MACN-Or-ct_1169_cytochrome_oxidase_subunit_1_(COI)_gene_partial_cds_mitochondrial
CTGTACTTAATCTTCGGCGCCTGAGCCGGAATAGTAGGTACTGCCCTAAGCCTCCTTATCCGAGCAGAACTGGGCCAACCCGGAGCCCTTCTAGGGGACGACCAAGTATATAACGTAGTCGTCACGGCCCATGCTTTCGTAATAATCTTCTTCATAGTGATACCAATTATAATTGGAGGGTTTGGAAACTGACTAGTCCCCCTAATAATTGGAGCCCCAGACATAGCATTCCCACGAATAAACAATATAAGCTTCTGACTACTTCCCCCATCTTTCCTCCTCCTCCTAGCATCCTCTACGGTCGAAGCAGGCGTAGGCACAGGCTGAACAGTCTACCCTCCCCTGGCCGGCAACTTAGCCCACGCCGGGGCCTCTGTTGACCTAGCAATCTTCTCCCTACACCTAGCCGGTATCTCCTCAATCCTAGGAGCAATCAACTTCATTACAACAGCAATTAACATAAAACCCCCCGCCCTCTCACAATACCAAACCCCCCTATTCGTCTGATCCGTCCTAATCACCGCCGTCCTACTGCTTCTTTCCCTTCCAGTCCTCGCTGCAGGAATTACTATACTTCTCACAGACCGTAACCTCAACACCACGTTCTTTGACCCTGCTGGAGGAGGAGACCCCATCCTATATCAACAC
>gi|197256317|gb|FJ028035.1|_Phrygilus_atriceps_voucher_MACN-Or-ct_1064_cytochrome_oxidase_subunit_1_(COI)_gene_partial_cds_mitochondrial
CTGTACCTAATCTTCGGCGCCTGAGCCGGAATAGTAGGTACTGCCCTAAGCCTCCTTATCCGAGCAGAACTGGGCCAACCCGGAGCCCTTCTAGAGGACGACCAAGTATATAACGTAGTCGTCACGGCCCATGCTTTCGTAATAATCTTCTTCATAGTGATACCAATTATAATTGGAGGGTTTGGAAACTGACTAGTCCCCCTAATAATTGGAGCCCCAGACATAGCATTCCCACGAATAAACAATATAAGCTTCTGACTACTTCCCCCATCTTTCCTCCTCCTCCTAGCATCCTCTACGGTCGAAGCAGGCGTAGGCACAGGCTGAACAGTCTACCCTCCCCTGGCCGGCAACTTAGCCCACGCCGGGGCCTCTGTTGACCTAGCAATCTTCTCCCTACACCTAGCCGGTATCTCCTCAATCCTAGGAGCAATCAACTTCATTACAACAGCAATTAACATAAAACCCCCCGCCCTCTCACAATACCAAACCCCCCTATTCGTCTGATCCGTCCTAATCACCGCCGTCCTACTGCTTCTTTCCCTTCCAGTCCTCGCTGCAGGAATTACTATACTTCTCACAGACCGTAACCTCAACACCACATTCTTTGACCCTGCTGGAGGAGGAGACCCCATCCTATATCAACAC
>gi|197256313|gb|FJ028033.1|_Phrygilus_alaudinus_voucher_MACN-Or-ct_823_cytochrome_oxidase_subunit_1_(COI)_gene_partial_cds_mitochondrial
CTGTACCTAATCTTCGGCGCGTGAGCCGGGATGGTAGGAACAGCCCTAAGCCTCCTCATTCGAGCAGAGCTGGGCCAACCTGGAGCCCTTCTGGGGGACGACCAAGTCTACAACGTGGTCGTCACAGCCCATGCTTTTGTAATAATCTTCTTCATAGTTATACCAATTATGATCGGAGGGTTCGGAAACTGACTAGTCCCCCTAATAATTGGAGCCCCAGACATAGCTTTCCCACGAATAAATAACATAAGCTTCTGACTACTACCCCCATCCTTCCTCCTCCTCCTGGCATCCTCTACAGTTGAAGCAGGCGTAGGCACTGGATGAACCGTGTATCCTCCATTAGCAGGCAACCTAGCCCACGCCGGAGCCTCAGTTGATCTGGCAATCTTCTCTCTACACCTAGCCGGCATCTCTTCAATCCTGGGAGCAATCAACTTCATCACAACCGCAGTCAACATAAAACCCCCTGCCCTCTCACAATACCAAACCCCTCTATTTGTATGATCAGTCCTAATCACCGCAGTACTATTACTCCTATCCCTCCCAGTCCTCGCCGCAGGGATCACAATGCTCCTTACAGATCGCAACCTTAACACTACCTTCTTCGACCCCGCCGGAGGAGGAGATCCCGTTCTATACCAACAC
>gi|197256309|gb|FJ028031.1|_Phrygilus_alaudinus_voucher_MACN-Or-ct_1029_cytochrome_oxidase_subunit_1_(COI)_gene_partial_cds_mitochondrial
CTGTACCTAATCTTCGGCGCGTGAGCCGGGATGGTAGGAACAGCCCTAAGCCTCCTCATTCGAGCAGAGCTGGGCCAACCTGGAGCCCTTCTGGGGGACGACCAAGTCTACAACGTGGTCGTCACAGCCCATGCTTTTGTAATAATCTTCTTCATAGTTATACCAATTATGATCGGAGGGTTCGGAAACTGACTAGTCCCCCTAATAATTGGAGCCCCAGACATAGCTTTCCCACGAATAAATAACATAAGCTTCTGACTACTACCCCCATCCTTCCTCCTCCTCCTGGCATCCTCTACAGTTGAAGCAGGCGTAGGCACTGGATGAACCGTGTATCCTCCATTAGCAGGCAACCTAGCCCACGCCGGAGCCTCAGTTGATCTGGCAATCTTCTCTCTACACCTAGCCGGCATCTCTTCAATCCTGGGAGCAATCAACTTCATCACAACCGCAGTCAACATAAAACCCCCTGCCCTCTCACAATACCAAACCCCTCTATTTGTATGATCAGTCCTAATCACCGCAGTACTATTACTCCTATCCCTCCCAGTCCTCGCCGCAGGGATCACAATGCTCCTTACAGATCGCAACCTTAACACTACCTTCTTCGACCCCGCCGGAGGAGGAGATCCCGTTCTATACCAACAC
>gi|197256305|gb|FJ028029.1|_Phoenicopterus_jamesi_voucher_MACN-Or-ct_1188_cytochrome_oxidase_subunit_1_(COI)_gene_partial_cds_mitochondrial
CTATACCTGATTTTCGGTGCATGAGCTGGAATAGTTGGTACAGCCCTAAGCCTACTCATTCGCGCAGAACTAGGACAACCTGGAACTCTCCTAGGAGACGACCAAATCTACAACGTAATCGTTACTGCCCATGCCTTCGTAATAATTTTCTTCATAGTTATACCAATCATAATCGGAGGCTTCGGAAACTGACTGGTTCCTCTCATAATTGGTGCTCCTGATATAGCATTTCCCCGCATAAACAACATAAGCTTCTGACTACTACCCCCATCCTTCTTACTCCTCCTAGCTTCCTCCACAGTAGAAGCTGGAGCAGGCACAGGATGAACTGTATACCCACCACTAGCTGGCAACATAGCCCATGCCGGAGCCTCAGTAGACCTAGCCATCTTCTCCCTCCACCTGGCAGGTGTATCATCTATCCTCGGGGCAATCAACTTTATCACTACTGCTATCAACATAAAACCACCCGCCCTCTCACAATACCAAACCCCCTTATTCGTATGATCCGTTCTCATCACCGCTGTCCTGTTACTGCTCTCACTTCCAGTCCTCGCTGCCGGCATTACCATACTGCTAACAGACCGAAACCTAAACACCACATTCTTCGATCCGGCAGGAGGAGGTGACCCAGTCCTATACCAACAC
>gi|197256301|gb|FJ028027.1|_Phoenicopterus_chilensis_voucher_MACN-Or-ct_1196_cytochrome_oxidase_subunit_1_(COI)_gene_partial_cds_mitochondrial
CTATACCTGATTTTCGGTGCATGAGCTGGGATAGTTGGCACAGCCCTAAGCCTACTCATTCGCGCAGAACTGGGACAACCTGGAACCCTCCTAGGGGACGACCAAATCTATAACGTAATCGTTACCGCCCATGCCTTCGTAATAATCTTCTTCATAGTTATACCAATCATAATTGGAGGTTTCGGAAACTGACTGGTTCCTCTCATAATTGGTGCTCCTGACATAGCATTTCCCCGCATAAACAACATAAGCTTCTGACTACTACCCCCATCCTTCTTACTCCTCCTAGCCTCCTCCACAGTAGAAGCTGGAGCAGGCACAGGATGAACTGTATACCCACCACTAGCTGGCAACATAGCCCATGCCGGAGCCTCAGTAGACCTAGCTATCTTCTCCCTCCACCTAGCAGGCGTATCATCTATTCTCGGAGCAATCAACTTTATCACTACTGCTATCAACATAAAACCACCCGCCCTCTCACAATACCAAACCCCCCTATTCGTATGATCCGTCCTCATCACCGCCGTCCTATTGCTACTCTCACTTCCAGTCCTTGCCGCCGGCATTACCATATTACTAACAGACCGAAACCTAAACACCACATTCTTCGATCCGGCCGGAGGAGGCGACCCAGTCCTATACCAACAC
>gi|197256297|gb|FJ028025.1|_Phoenicopterus_andinus_voucher_MACN-Or-ct_1216_cytochrome_oxidase_subunit_1_(COI)_gene_partial_cds_mitochondrial
CTGTACCTGATTTTCGGTGCATGAGCTGGAATAGTTGGTACAGCCCTAAGCCTACTCATTCGCGCAGAACTGGGACAACCCGGAACTCTCCTAGGAGACGACCAAATCTACAACGTAATCGTTACTGCCCATGCCTTCGTAATAATTTTCTTCATAGTTATACCAATCATAATCGGAGGCTTCGGAAACTGACTGGTTCCTCTCATAATTGGTGCTCCTGATATAGCATTTCCCCGCATAAACAACATAAGCTTCTGACTACTACCCCCATCCTTCTTACTCCTCCTAGCTTCCTCCACAGTAGAAGCTGGAGCAGGCACAGGATGAACTGTATACCCACCACTAGCTGGCAACATAGCCCATGCTGGAGCCTCAGTAGACCTAGCCATCTTCTCCCTCCACCTAGCAGGTGTATCATCTATCCTTGGAGCAATCAACTTTATCACTACCGCTATCAACATAAAACCACCCGCCCTCTCACAATACCAAACCCCCCTATTCGTATGATCCGTCCTCATCACCGCTGTCCTGTTACTGCTCTCACTTCCAGTCCTTGCTGCCGGCATTACCATACTGCTAACAGACCGAAACCTAAACACCACATTCTTCGATCCGGCTGGAGGAGGTGACCCAGTCCTATACCAACAC
>gi|197256293|gb|FJ028023.1|_Phleocryptes_melanops_voucher_MACN-Or-ct_2160_cytochrome_oxidase_subunit_1_(COI)_gene_partial_cds_mitochondrial
CTCTACCTAATTTTCGGAGCATGAGCTGGCATAATTGGAACCGCCCTTAGCCTCCTCATTCGGGCCGAACTAGGACAACCAGGCACCCTTCTAGGCGATGACCAAATTTACAATGTAATTGTCACTGCCCATGCCTTCGTAATGATCTTCTTTATAGTCATACCTATCATAATCGGTGGCTTTGGCAACTGACTAGTGCCCCTAATAATCGGCGCCCCCGACATAGCCTTCCCTCGAATAAATAATATAAGCTTCTGACTCCTACCACCATCTTTCCTACTCCTACTAGCCTCTTCAACAGTAGAAGCTGGAGCTGGAACAGGATGAACAGTCTATCCCCCACTAGCAGGCAACCTCGCCCACGCCGGAGCCTCAGTAGACCTGGCAATCTTTTCCCTCCACTTAGCCGGTGTATCCTCTATCCTAGGCGCTATTAACTTTATTACAACCGCAATCAACATAAAACCACCCGCCCTCTCACAATACCAAACCCCACTATTTGTATGATCCGTCCTCATCACTGCCGTACTCCTCTTACTCTCTCTACCCGTCCTAGCCGCTGGAATCACAATACTACTCACAGACCGTAACCTAAATACTACCTTCTTTGACCCGGCCGGAGGCGGAGACCCTGTTCTATATCAACAC
>gi|197256289|gb|FJ028021.1|_Phleocryptes_melanops_voucher_MACN-Or-ct_677_cytochrome_oxidase_subunit_1_(COI)_gene_partial_cds_mitochondrial
CTCTACCTAATTTTCGGAGCATGAGCTGGCATAATTGGAACCGCCCTTAGCCTCCTCATTCGGGCCGAACTAGGACAACCAGGCACCCTTCTAGGCGATGACCAAATTTACAATGTAATTGTCACTGCCCATGCCTTCGTAATGATCTTCTTTATAGTCATACCTATCATAATCGGTGGCTTTGGCAACTGACTAGTGCCCCTAATAATCGGCGCCCCCGACATAGCCTTCCCTCGAATAAATAATATAAGCTTCTGACTCCTACCACCATCTTTCCTACTCCTACTAGCCTCTTCAACAGTAGAAGCTGGAGCTGGAACAGGATGAACAGTCTATCCCCCACTAGCAGGCAACCTCGCCCACGCCGGAGCCTCAGTAGACCTGGCAATCTTTTCCCTCCACTTAGCCGGTGTATCCTCTATCCTAGGCGCTATTAACTTTATTACAACCGCAATCAACATAAAACCACCCGCCCTCTCACAATACCAAACCCCACTATTTGTATGATCCGTCCTCATCACTGCCGTACTCCTCTTACTCTCTCTACCCGTCCTAGCCGCTGGAATCACAATACTACTCACAGACCGTAACCTAAATACTACCTTCTTTGACCCGGCCGGAGGCGGAGACCCTGTTCTATATCAACAC
>gi|197256285|gb|FJ028019.1|_Phleocryptes_melanops_voucher_MACN-Or-ct_572_cytochrome_oxidase_subunit_1_(COI)_gene_partial_cds_mitochondrial
CTCTACCTAATTTTCGGAGCATGAGCTGGCATAATTGGAACCGCCCTTAGCCTCCTCATTCGGGCCGAACTAGGACAACCAGGCACCCTTCTAGGCGATGACCAAATTTACAATGTAATTGTCACTGCCCATGCCTTCGTAATGATCTTCTTTATAGTCATACCTATCATAATCGGTGGCTTTGGCAACTGACTAGTGCCCCTAATAATCGGCGCCCCCGACATAGCCTTCCCTCGAATAAATAATATAAGCTTCTGACTCCTACCACCATCTTTCCTACTCCTACTAGCCTCTTCAACAGTAGAAGCTGGAGCTGGAACAGGATGAACAGTCTATCCCCCACTAGCAGGCAACCTCGCCCACGCCGGAGCCTCAGTAGACCTGGCAATCTTTTCCCTCCACTTAGCCGGTGTATCCTCTATCCTAGGCGCTATTAACTTTATTACAACCGCAATCAACATAAAACCACCCGCCCTCTCACAATACCAAACCCCACTATTTGTATGATCCGTCCTCATCACTGCCGTACTCCTCTTACTCTCTCTACCCGTCCTAGCCGCTGGAATCACAATACTACTCACAGACCGTAACCTAAATACTACCTTCTTTGACCCGGCCGGAGGCGGAGACCCTGTTCTATATCAACAC
>gi|197256281|gb|FJ028017.1|_Phimosus_infuscatus_voucher_MACN-Or-ct_1497_cytochrome_oxidase_subunit_1_(COI)_gene_partial_cds_mitochondrial
CTATACCTAATCTTCGGCGCATGAGCAGGTATAGTCGGAACCGCCCTCAGCTTACTCATTCGTGCAGAACTTGGTCAACCTGGAACACTCCTGGGAGATGACCAAATCTACAACGTAGTCGTCACCGCCCATGCCTTCGTAATAATCTTTTTTATAGTTATACCGATCATGATCGGTGGATTTGGAAACTGATTAGTCCCACTCATAATCGGCGCACCCGACATAGCATTCCCACGCATAAACAACATAAGCTTCTGATTACTACCCCCCTCCTTCTTACTCCTTTTAGCTTCTTCCACAGTAGAAGCAGGAGCGGGTACAGGATGAACTGTATACCCCCCACTCGCTGGCAACCTTGCTCATGCCGGAGCCTCAGTAGACCTGGCTATCTTCTCCCTTCACCTAGCCGGAGTGTCATCTATCCTAGGGGCAATCAACTTTATCACAACTGCCATCAATATAAAACCCCCAGCACTCTCACAGTATCAAACACCCTTATTCGTTTGATCAGTCCTAATTACTGCCGTACTATTACTACTCTCATTACCAGTCCTTGCCGCCGGTATCACTATACTATTAACAGATCGAAACCTAAACACTACATTCTTTGATCCTGCAGGAGGAGGAGACCCTGTCTTATATCAACAT
>gi|197256277|gb|FJ028015.1|_Philydor_lichtensteini_voucher_MACN-Or-ct_2033_cytochrome_oxidase_subunit_1_(COI)_gene_partial_cds_mitochondrial
CTTTACCTAATTTTTGGAGCATGAGCTGGCATAATTGGAACCTCCCTCAGTCTCCTAATCCGAGCCGAACTTGGACAACCAGGCACTCTACTAGGCGACGATCAAATTTATAACGTAATTGTTACTGCCCATGCCTTCGTAATAATCTTCTTTATAGTTATACCCATCATAATCGGTGGCTTCGGCAACTGATTAGTCCCACTAATAATTGGCGCCCCCGATATAGCATTTCCCCGAATAAATAACATAAGCTTTTGACTCTTACCCCCATCCTTCCTACTACTACTAGCCTCCTCAACAGTAGAAGCTGGAGCAGGAACAGGATGAACAGTTTATCCTCCACTAGCAGGTAACCTAGCCCATGCTGGAGCTTCCGTAGACCTAGCCATCTTCTCCCTTCACCTAGCAGGTGTATCCTCTATTTTAGGAGCCATTAACTTTATTACAACCGCAATCAACATAAAACCACCAGCCCTCTCACAATACCAAACTCCACTATTCGTTTGATCCGTCCTCATCACCGCCGTATTACTTTTACTCTCTCTCCCTGTCTTAGCTGCTGGTATCACAATACTACTTACAGACCGTAACCTTAACACCACATTCTTTGATCCAGCCGGAGGTGGAGACCCTGTCCTGTACCAACAC
>gi|197256273|gb|FJ028013.1|_Philydor_atricapillus_voucher_MACN-Or-ct_2847_cytochrome_oxidase_subunit_1_(COI)_gene_partial_cds_mitochondrial
CTTTACTTAATTTTTGGAGCATGAGCCGGTATAATTGGAACATCCCTTAGCCTCCTAATCCGAGCCGAACTTGGGCAACCAGGAACCCTCCTAGGTGACGATCAAATTTATAATGTGATTGTTACTGCTCATGCCTTCGTAATAATCTTCTTTATAGTTATGCCTATTATAATCGGTGGCTTCGGCAACTGATTAGTCCCACTAATAATTGGCGCCCCCGATATAGCATTCCCTCGAATAAACAATATAAGCTTCTGACTTCTACCCCCATCCTTCCTACTGCTTCTAGCCTCCTCAACAGTAGAAGCTGGAGTAGGAACAGGATGAACAGTCTATCCCCCACTAGCAGGCAACCTAGCCCACGCTGGAGCCTCAGTAGACCTAGCTATCTTCTCTCTCCACCTAGCAGGTGTATCCTCTATTTTAGGAGCTATTAACTTTATCACAACCGCAATCAACATAAAACCACCCGCCCTCTCACAATACCAAACTCCATTGTTTGTTTGATCCGTCCTTATTACTGCTGTACTACTCCTACTCTCCCTCCCTGTCCTAGCCGCCGGCATCACAATACTACTCACAGACCGCAACCTTAACACCACATTCTTTGACCCAGCCGGAGGCGGAGATCCCGTCCTATACCAACAC
>gi|197256269|gb|FJ028011.1|_Pheucticus_aureoventris_voucher_MACN-Or-ct_727_cytochrome_oxidase_subunit_1_(COI)_gene_partial_cds_mitochondrial
CTGTACTTAATCTTCGGCGCATGAGCCGGAATAGTAGGTACCGCCCTAAGCCTCCTTATCCGAGCAGAACTAGGGCAACCTGGAGCCCTTCTAGGAGACGACCAAGTTTACAACGTAGTCGTCACAGCCCATGCTTTCGTAATAATTTTCTTCATAGTTATACCAATTATAATCGGAGGATTTGGAAACTGATTAGTCCCCCTAATAATTGGAGCCCCAGACATAGCATTCCCACGAATAAATAACATAAGCTTTTGACTCCTACCCCCATCCTTCCTACTCCTTCTGGCATCCTCTACAGTTGAAGCAGGTGCAGGAACAGGATGAACAGTATATCCACCACTAGCTGGTAACTTAGCCCATGCCGGAGCTTCAGTTGACCTAGCAATCTTCTCCCTACATCTGGCCGGTATCTCTTCGATCCTGGGGGCTATCAACTTCATCACAACAGCAATCAACATAAAACCCCCTGCCCTTTCACAATACCAAACCCCCCTATTCGTATGATCCGTACTAATCACCGCAGTACTACTTCTCCTTTCCCTTCCAGTACTGGCCGCAGGCATTACAATGCTTCTCACAGACCGTAACCTCAACACTACATTCTTCGACCCCGCTGGAGGAGGAGACCCTGTACTATACCAACAC
>gi|197256265|gb|FJ028009.1|_Phalacrocorax_brasilianus_voucher_MACN-Or-ct_1796_cytochrome_oxidase_subunit_1_(COI)_gene_partial_cds_mitochondrial
CTTTACCTCATCTTCGGCGCCTGAGCTGGCATAGTCGGAACTGCCCTTAGCTTGCTTATCCGCGCAGAACTCGGTCAACCAGGAACCCTCCTTGGAGATGACCAAATCTACAATGTAATTGTCACCGCCCATGCTTTCGTAATAATCTTCTTCATGGTAATACCCATTATAATCGGAGGATTCGGAAACTGACTGGTCCCCCTCATAATCGGCGCCCCCGACATAGCATTCCCACGTATAAACAACATAAGCTTCTGACTCCTTCCACCATCATTCCTCCTCTTATTAGCCTCCTCTACAGTAGAAGCAGGCGCAGGTACAGGATGAACGGTATATCCACCCCTAGCCGGAAACCTAGCCCATGCTGGAGCCTCAGTTGACCTAGCCATCTTCTCCCTTCACTTAGCAGGGGTCTCCTCAATCCTAGGAGCAATCAACTTCATCACAACTGCCATTAACATAAAACCCCCAGCCCTATCACAATACCAAACACCGCTGTTCGTTTGATCCGTACTAATCACCGCAGTCTTACTCTTACTCTCACTCCCAGTCCTTGCTGCCGGAATCACCATACTCCTAACAGACCGAAACCTAAACACAACATTCTTTGACCCTGCTGGAGGAGGAGACCCAGTCCTATACCAACAC
>gi|197256261|gb|FJ028007.1|_Phalacrocorax_brasilianus_voucher_MACN-Or-ct_383_cytochrome_oxidase_subunit_1_(COI)_gene_partial_cds_mitochondrial
CTTTACCTCATCTTCGGCGCCTGAGCTGGCATAGTCGGAACTGCCCTTAGCTTGCTTATCCGCGCAGAACTCGGTCAACCAGGAACCCTCCTTGGAGATGACCAAATCTACAATGTAATTGTCACCGCCCATGCTTTCGTAATAATCTTCTTCATGGTAATGCCCATTATAATCGGAGGATTCGGAAACTGACTGGTCCCCCTCATAATCGGCGCCCCCGACATAGCATTCCCACGTATAAACAACATAAGCTTCTGACTCCTTCCACCATCATTCCTCCTCTTATTAGCCTCCTCTACAGTAGAAGCAGGCGCAGGTACAGGATGAACGGTATATCCACCCCTAGCCGGAAACCTAGCCCATGCTGGAGCCTCAGTTGACCTAGCCATCTTCTCCCTTCACTTAGCAGGGGTCTCCTCAATCCTAGGAGCAATCAACTTCATCACAACTGCCATTAACATAAAACCCCCAGCCCTATCACAATACCAAACACCGCTGTTCGTTTGATCCGTACTAATCACCGCAGTCTTACTCTTACTCTCACTCCCAGTCCTTGCTGCCGGAATCACCATACTCCTAACAGACCGAAACCTAAACACAACATTCTTTGACCCTGCTGGAGGAGGAGACCCAGTCCTATACCAACAC
>gi|197256257|gb|FJ028005.1|_Phalacrocorax_atriceps_voucher_MACN-Or-ct_1342_cytochrome_oxidase_subunit_1_(COI)_gene_partial_cds_mitochondrial
CTTTACCTTATCTTCGGCGCCTGAGCTGGCATAGTCGGAACTGCCCTCAGCCTACTCATCCGCGCAGAACTGGGCCAACCAGGAACTCTCCTAGGAGACGACCAAATCTACAACGTAATTGTCACCGCCCATGCCTTCGTAATAATCTTCTTTATAGTAATGCCTATTATAATCGGAGGATTTGGAAACTGACTAGTCCCCCTCATAATCGGCGCCCCCGACATAGCATTCCCTCGCATAAACAACATAAGCTTCTGACTCCTTCCACCATCATTCCTCCTCTTATTAGCTTCCTCTACAGTAGAAGCAGGTGCAGGTACAGGATGAACGGTATATCCGCCCCTAGCTGGAAACCTAGCTCATGCCGGAGCCTCAGTCGACCTGGCCATCTTCTCCCTTCACTTAGCAGGAGTCTCCTCAATCTTAGGGGCAATCAACTTCATTACAACTGCCATTAACATAAAACCCCCAGCCCTATCACAATACCAAACCCCACTATTCGTCTGATCCGTATTAATCACCGCAGTCTTACTCTTACTCTCACTCCCAGTCCTCGCTGCTGGAATCACCATACTCCTAACAGATCGAAACCTAAACACAACATTCTTTGACCCTGCTGGAGGAGGAGACCCAGTCCTATATCAACAC
>gi|197256253|gb|FJ028003.1|_Phaethornis_eurynome_voucher_MACN-Or-ct_2941_cytochrome_oxidase_subunit_1_(COI)_gene_partial_cds_mitochondrial
CTGTACCTGATCTTCGGGGCATGAGCCGGAATAGTCGGAACAGCCCTAAGCCTATTAATCCGAGCGGAACTTGGCCAACCAGGCTCCCTCCTTGGAGACGACCAAATCTACAATGTAATCGTCACTGCCCATGCCTTTGTAATAATCTTCTTCATAGTCATGCCAATCATAATCGGAGGATTTGGCAACTGACTAATCCCTTTAATAATTGGAGCCCCTGACATGGCATTCCCACGCATAAACAACATAAGCTTTTGACTCCTACCACCCTCATTCCTCCTCCTCCTTGCCTCCTCCACAGTAGAGGCCGGAGCAGGTACAGGATGAACTGTATACCCCCCTCTAGCCGGCAATTTAGCCCACGCAGGCGCATCCGTAGACCTAGCAATCTTCTCCCTTCACCTATCAGGCATCTCATCAATTCTAGGAGCAATTAACTTTATCACCACCGCAATCAACATAAAACCACCCGCTTTAACACAATACCAAACCCCCTTATTCGTCTGATCTGTCCTCATCACCGCCGTATTACTTCTCCTCTCGCTCCCAGTTCTTGCTGCTGGAATTACAATACTGCTCACAGACCGAAACCTAAACACCACATTCTTCGACCCCGCCGGAGGAGGTGACCCCATCCTATACCAGCAT
>gi|197256249|gb|FJ028001.1|_Phaeomyias_murina_voucher_MACN-Or-ct_795_cytochrome_oxidase_subunit_1_(COI)_gene_partial_cds_mitochondrial
TTATACCTAATTTTCGGCGCCTGAGCTGGTATGATCGGCACTGCTTTAAGTCTTCTCATCCGAGCAGAACTTGGACAGCCAGGAACTCTCCTGGGAGACGACCAAATTTACAATGTAATCGTCACTGCTCATGCCTTCGTAATAATCTTCTTCATAGTAATACCCATCATAATCGGAGGATTTGGTAACTGACTAGTCCCCCTAATAATTGGTGCCCCAGACATAGCTTTCCCACGAATAAACAATATAAGTTTCTGACTCTTACCCCCATCATTTCTTCTTCTTCTAGCCTCATCAACAGTGGAAGCCGGAGTAGGAACCGGATGAACTGTCTACCCACCCTTAGCTGGTAACCTAGCCCATGCTGGTGCTTCAGTAGACCTAGCAATCTTCTCCCTCCACCTTGCAGGTGTCTCCTCAATCCTAGGTGCTATCAACTTCATTACTACTGCAGTCAACATAAAACCACCAGCTTTATCACAATACCAAACACCCCTATTCGTATGATCTGTCCTAATTACTGCAGTTCTCCTCCTGCTATCCCTTCCAGTTCTTGCTGCAGGCATCACTATACTCCTAACAGATCGTAACCTTAACACAACATTTTTCGACCCCGCGGGAGGTGGAGACCCAGTTTTATACC-----
>gi|197256245|gb|FJ027999.1|_Phacellodomus_striaticollis_voucher_MACN-Or-ct_2151_cytochrome_oxidase_subunit_1_(COI)_gene_partial_cds_mitochondrial
CTTTACCTAATTTTCGGAGCATGAGCTGGCATAATCGGAACCGCCTTAAGCCTCCTAATCCGAGCTGAACTTGGACAACCAGGTACCCTACTAGGCGACGACCAAATCTATAATGTAATCGTCACTGCCCATGCTTTCGTAATAATCTTCTTTATAGTTATACCTATTATAATCGGGGGCTTTGGCAACTGACTAGTCCCACTAATAATTGGCGCCCCAGACATAGCTTTCCCCCGAATAAACAACATAAGCTTCTGACTCTTACCTCCATCCTTCCTTCTACTTCTAGCCTCCTCAACAGTAGAAGCTGGGGCAGGAACAGGATGAACAGTGTACCCACCACTAGCAGGCAATCTAGCCCACGCCGGAGCCTCAGTTGACCTAGCCATCTTTTCTCTCCATCTAGCCGGTGTTTCCTCCATCCTAGGGGCCATTAACTTTATCACAACCGCTATCAACATAAAACCACCCACTCTCTCGCAGTACCAAACACCACTATTCGTCTGATCCGTCCTTATCACCGCCGTACTTCTTCTACTCTCCCTCCCCGTTCTAGCTGCCGGCATTACAATACTACTAACAGACCGTAACCTAAACACTACATTCTTTGACCCTGCTGGAGGCGGAGACCCAGTACTATACCAACAC
>gi|197256241|gb|FJ027997.1|_Phacellodomus_striaticollis_voucher_MACN-Or-ct_2176_cytochrome_oxidase_subunit_1_(COI)_gene_partial_cds_mitochondrial
CTTTACCTAATTTTCGGAGCATGAGCTGGCATAATCGGAACCGCCTTAAGCCTCCTAATCCGAGCTGAACTTGGACAACCAGGTACCCTACTAGGCGACGACCAAATCTATAATGTAATCGTCACTGCCCATGCTTTCGTAATAATCTTCTTTATAGTTATACCTATTATAATCGGGGGCTTTGGCAACTGACTAGTCCCACTAATAATTGGCGCCCCAGACATAGCTTTCCCCCGAATAAACAACATAAGCTTCTGACTCTTACCTCCATCCTTCCTTCTACTTCTAGCCTCCTCAACAGTAGAAGCTGGGGCAGGAACAGGATGAACAGTGTACCCACCACTAGCAGGCAATCTAGCCCACGCCGGAGCCTCAGTTGACCTAGCCATCTTTTCTCTCCATCTAGCCGGTGTTTCCTCCATCCTAGGGGCCATTAACTTTATCACAACCGCTATCAACATAAAACCACCCACTCTCTCGCAGTACCAAACACCACTATTCGTCTGATCCGTCCTTATCACCGCCGTACTTCTTCTACTCTCCCTCCCCGTTCTAGCTGCCGGCATTACAATACTACTAACAGACCGTAACCTAAACACTACATTCTTTGACCCTGCTGGAGGCGGAGACCCAGTACTATACCAACAC
>gi|197256237|gb|FJ027995.1|_Phacellodomus_rufifrons_voucher_MACN-Or-ct_794_cytochrome_oxidase_subunit_1_(COI)_gene_partial_cds_mitochondrial
CTTTACCTAATTTTCGGAGCATGAGCTGGCATAATCGGAACCGCCCTAAGCCTCCTGATTCGAGCCGAACTTGGACAACCAGGCACTCTCCTAGGCGACGACCAAATCTACAATGTAATCGTCACTGCCCATGCTTTCGTAATGATCTTCTTTATAGTTATGCCCATTATAATCGGCGGTTTTGGCAACTGACTAGTCCCACTAATAATTGGCGCCCCAGACATAGCCTTCCCCCGAATAAATAACATAAGCTTCTGACTCTTACCTCCATCCTTCTTACTACTTCTAGCCTCCTCAACAGTAGAAGCTGGGGCAGGAACAGGATGAACAGTGTACCCTCCACTAGCAGGCAACCTGGCCCACGCTGGAGCCTCAGTTGACCTGGCCATCTTCTCCCTTCATTTAGCAGGTGTCTCCTCTATCCTAGGAGCCATTAACTTTATCACAACCGCTATCAATATAAAACCACCAACTCTCTCACAATACCAAACACCACTATTTGTCTGATCCGTCCTTATTACCGCTGTACTTCTTCTACTCTCCCTCCCCGTTCTAGCTGCCGGCATCACAATACTACTAACAGATCGCAACCTAAACACTACATTCTTTGACCCTGCCGGAGGCGGAGACCCAGTACTATACCAACAC
>gi|197256233|gb|FJ027993.1|_Phacellodomus_ruber_voucher_MACN-Or-ct_1836_cytochrome_oxidase_subunit_1_(COI)_gene_partial_cds_mitochondrial
CTTTACCTTANTTTCGGAGCATGAGCTGGCATAATCGGAACCGCCTTAAGCCTCCTAATCCGAGCTGAACTCGGACAACCAGGTACCCTGCTAGGCGATGACCAAATCTACAATGTAATCGTCACTGCCCATGCTTTTGTAATAATCTTCTTTATAGTTATGCCCATTATAATCGGGGGCTTTGGCAACTGACTAGTCCCACTAATAATTGGCGCCCCAGACATAGCCTTCCCCCGAATAAACAACATAAGCTTCTGACTCTTACCTCCATCCTTCCTACTACTCCTAGCCTCCTCAACAGTAGAAGCTGGGGCAGGAACAGGATGAACAGTGTACCCCCCATTAGCCGGCAATCTAGCTCACGCCGGAGCCTCAGTTGACTTAGCCATCTTTTCTCTCCATCTAGCCGGTGTTTCCTCCATCCTAGGGGCCATTAACTTTATCACAACCGCTATCAACATAAAACCACCCACTCTCTCACAGTACCAAACGCCACTATTCGTCTGATCTGTCCTTATCACCGCCGTACTTCTCCTACTCTCCCTCCCCGTTCTAGCTGCCGGCATTACAATACTACTCACAGACCGCAACCTAAACACTACATTCTTTGACCCTGCCGGAGGCGGAGACCCAGTACTATACCAACAC
>gi|197256229|gb|FJ027991.1|_Phacellodomus_ruber_voucher_MACN-Or-ct_1620_cytochrome_oxidase_subunit_1_(COI)_gene_partial_cds_mitochondrial
CTTTACCTAATTTTCGGAGCATGAGCTGGCATAATCGGAACCGCCTTAAGCCTCCTAATCCGAGCTGAACTCGGACAACCAGGTACCCTGCTAGGCGATGACCAAATCTACAATGTAATCGTCACTGCCCATGCTTTTGTAATAATCTTCTTTATAGTTATGCCCATTATAATCGGGGGCTTTGGCAACTGACTAGTCCCACTAATAATTGGCGCCCCAGACATAGCCTTCCCCCGAATAAACAACATAAGCTTCTGACTCTTACCTCCATCCTTCCTACTACTCCTAGCCTCCTCAACAGTAGAAGCTGGGGCAGGAACAGGATGAACAGTGTACCCCCCATTAGCCGGCAATCTAGCTCACGCCGGAGCCTCAGTTGACTTAGCCATCTTTTCTCTCCATCTAGCCGGTGTTTCCTCCATCCTAGGGGCCATTAACTTTATCACAACCGCTATCAACATAAAACCACCCACTCTCTCACAGTACCAAACGCCACTATTCGTCTGATCTGTCCTTATCACCGCCGTACTTCTCCTACTCTCCCTCCCCGTTCTAGCTGCCGGCATTACAATACTACTCACAGACCGCAACCTAAACACTACATTCTTTGACCCTGCCGGAGGCGGAGACCCAGTACTATACCAACAC
>gi|197256225|gb|FJ027989.1|_Phacellodomus_ruber_voucher_MACN-Or-ct_1420_cytochrome_oxidase_subunit_1_(COI)_gene_partial_cds_mitochondrial
CTTTACCTAATTTTCGGAGCATGAGCTGGCATAATCGGAACCGCCTTAAGCCTCCTAATCCGAGCTGAACTCGGACAACCAGGTACCCTGCTAGGCGATGACCAAATCTACAATGTAATCGTCACTGCCCATGCTTTTGTAATAATCTTCTTTATAGTTATGCCCATTATAATCGGGGGCTTTGGCAACTGACTAGTCCCACTAATAATTGGCGCCCCAGACATAGCCTTCCCCCGAATAAACAACATAAGCTTCTGACTCTTACCTCCATCCTTCCTACTACTCCTAGCCTCCTCAACAGTAGAAGCTGGGGCAGGAACAGGATGAACAGTGTACCCCCCATTAGCCGGCAATCTAGCTCACGCCGGAGCCTCAGTTGACTTAGCCATCTTTTCTCTCCATCTAGCCGGTGTTTCCTCCATCCTAGGGGCCATTAACTTTATCACAACCGCTATCAACATAAAACCACCCACTCTCTCACAGTACCAAACGCCACTATTCGTCTGATCTGTCCTTATCACCGCCGTACTTCTCCTACTCTCCCTCCCCGTTCTAGCTGCCGGCATTACAATACTACTCACAGACCGCAACCTAAACACTACATTCTTTGACCCTGCCGGAGGCGGAGACCCAGTACTATACCAACAC
>gi|197256221|gb|FJ027987.1|_Phacellodomus_ruber_voucher_MACN-Or-ct_1362_cytochrome_oxidase_subunit_1_(COI)_gene_partial_cds_mitochondrial
CTTTACCTAATTTTCGGAGCATGAGCTGGCATAATCGGAACCGCCTTAAGCCTCCTAATCCGAGCTGAACTCGGACAACCAGGTACCCTGCTAGGCGATGACCAAATCTACAATGTAATCGTCACTGCCCATGCTTTTGTAATAATCTTCTTTATAGTTATGCCCATTATAATCGGGGGCTTTGGCAACTGACTAGTCCCACTAATAATTGGCGCCCCAGACATAGCCTTCCCCCGAATAAACAACATAAGCTTCTGACTCTTACCTCCATCCTTCCTACTACTCCTAGCCTCCTCAACAGTAGAAGCTGGGGCAGGAACAGGATGAACAGTGTACCCCCCATTAGCCGGCAATCTAGCTCACGCCGGAGCCTCAGTTGACTTAGCCATCTTTTCTCTCCATCTAGCCGGTGTTTCCTCCATCCTAGGGGCCATTAACTTTATCACAACCGCTATCAACATAAAACCACCCACTCTCTCACAGTACCAAACGCCACTATTCGTCTGATCTGTCCTTATCACCGCCGTACTTCTCCTACTCTCCCTCCCCGTTCTAGCTGCCGGCATTACAATACTACTCACAGACCGCAACCTAAACACTACATTCTTTGACCCTGCCGGAGGCGGAGACCCAGTACTATACCAACAC
>gi|197256217|gb|FJ027985.1|_Pelecanoides_magellani_voucher_MACN-Or-ct_289_cytochrome_oxidase_subunit_1_(COI)_gene_partial_cds_mitochondrial
----------------------GAGCTGGTATAGTTGGAACCGCCCTTAGCCTACTTATCCGTGCAGAACTTGGACAACCAGGAACCCTTTTAGGAGACGACCAGATCTATAATGTAATCGTCACCGCCCATGCTTTCGTAATAATCTTCTTTATGGTGATACCCATTATAATTGGCGGATTTGGAAATTGACTTGTACCCCTAATAATCGGTGCTCCTGATATAGCATTTCCACGTATAAATAATATAAGCTTTTGACTACTACCCCCATCCTTTCTCTTACTACTAGCCTCATCCACAGTAGAAGCAGGGGCAGGAACAGGATGAACCGTATATCCCCCCCTAGCAGGTAACATAGCCCATGCTGGAGCTTCAGTCGACCTAGCCATTTTCTCACTCCATTTAGCAGGTATTTCTTCTATTCTAGGAGCAATTAATTTTATCACAACAGCTATCAACATAAAACCCCCAGCCCTCTCACAATATCAAACTCCCCTATTTGTGTGATCCGTACTTATCACCGCCGTCTTACTCTTACTATCACTGCCAGTCCTAGCTGCAGGGATCACCATACTACTAACAGATCGAAACCTAAACACCACATTCTTTGACCCAGCTGGTGGAGGAGACCCCATCTTATACCAGCAC
>gi|197256213|gb|FJ027983.1|_Pelecanoides_georgicus_voucher_MACN-Or-ct_1924_cytochrome_oxidase_subunit_1_(COI)_gene_partial_cds_mitochondrial
CTGTACNTGATCTTCGGCGCATGAGCTGGTATAGTCGGAACCGCCCTTAGCCTACTTATCCGTGCAGAACTCGGACAACCAGGAACTCTCTTAGGAGACGACCAAATCTATAACGTAATCGTCACTGCTCATGCTTTCGTAATAATCTTCTTTATGGTAATACCTATCATGATCGGTGGATTTGGAAACTGACTCGTACCTCTAATAATCGGTGCTCCCGATATAGCATTTCCACGTATAAACAATATAAGCTTTTGATTACTGCCCCCATCCTTCCTCCTACTACTAGCCTCGTCCACAGTAGAAGCAGGGGCAGGAACAGGATGAACCGTATACCCCCCTCTAGCAGGCAACATAGCCCATGCTGGAGCTTCAGTCGACCTAGCTATTTTCTCACTCCATTTAGCAGGTGTTTCTTCTATTCTAGGAGCAATTAATTTTATCACAACAGCTATCAACATAAAACCCCCAGCCCTCTCACAATATCAAACTCCCCTATTCGTATGATCCGTACTTATCACCGCCGTCTTACTTTTACTCTCACTTCCAGTCCTAGCTGCAGGAATCACCATACTACTAACAGACCGAAACCTAAACACCACATTCTTCGACCCAGCTGGTGGAGGAGACCCAATCCTATACCAACAC
>gi|197256209|gb|FJ027981.1|_Patagona_gigas_voucher_MACN-Or-ct_1055_cytochrome_oxidase_subunit_1_(COI)_gene_partial_cds_mitochondrial
CTATACCTAATCTTTGGAGCATGAGCTGGAATAGTTGGAACTGCCCTCAGCCTCCTCATTCGAGCAGAACTTGGCCAGCCCGGCTCTCTCTTAGGAGACGACCAAATCTACAATGTGGTCGTCACCGCTCACGCTTTCGTAATGATCTTCTTTATAGTTATGCCAGTCATGATTGGTGGCTTCGGGAACTGACTAGTACCCTTAATAATTGGAGCACCCGACATAGCGTTCCCCCGTATAAACAACATGAGCTTTTGACTCCTACCACCGTCATTTCTCCTACTTTTAGCCTCCTCCACTGTAGAAGCAGGCGCAGGCACAGGATGAACTGTATACCCGCCCCTAGCTGGCAACCTAGCCCACGCAGGGGCATCAGTGGACCTGGCCATCTTCTCCCTCCACCTCTCCGGCATCTCATCGATCCTAGGAGCAATCAACTTCATTACCACCGCAATCAACATGAAACCACCTGCCCTGTCACAATACCAAACTCCTCTATTCGTCTGATCCGTACTCATTACCGCCGTCCTTTTACTCCTCTCACTGCCAGTGCTCGCTGCCGGAATCACCATGCTACTCACAGACCGAAACCTTAATACCACATTCTTCGACCCCGCCGGAGGAGGAGACCCCATCCTATACCAACAC
>gi|197256205|gb|FJ027979.1|_Patagioenas_picazuro_voucher_MACN-Or-ct_1949_cytochrome_oxidase_subunit_1_(COI)_gene_partial_cds_mitochondrial
CTATATCTAATCTTCGGCGCATGAGCCGGCATAGTTGGCACCGCACTTAGTCTCCTCATTCGCGCAGAACTAGGACAACCAGGCACTCTCCTGGGAGACGACCAAATCTACAACGTAATTGTTACAGCCCATGCTTTCGTAATAATTTTCTTTATAGTCATACCCATCATAATCGGAGGCTTTGGAAACTGATTAGTCCCCCTTATAATCGGCGCCCCCGACATAGCATTCCCACGAATAAACAACATAAGTTTTTGACTACTACCTCCATCTTTCCTCCTTCTTCTGGCTTCTTCCACAATCGAAGCTGGTGCAGGAACAGGGTGAACCGTATACCCTCCCCTAGCCGGCAACCTAGCCCACGCAGGAGCTTCCGTAGACCTTGCCATCTTCTCCCTCCATCTTGCCGGTGTCTCTTCCATCCTAGGGGCCATCAACTTTATCACAACTGCCATTAACATAAAACCACCAGCCCTCTCACAATACCAAACCCCCCTGTTCGTATGATCAGTCCTCATCACCGCCGTCCTCCTTCTCCTATCCCTCCCAGTCCTTGCCGCCGGCATTACAATACTGCTCACAGACCGGAACCTTAACACTACCTTCTTCGACCCTGCCGGTGGAGGCGACCCAGTATTATACCAACAC
>gi|197256201|gb|FJ027977.1|_Patagioenas_picazuro_voucher_MACN-Or-ct_399_cytochrome_oxidase_subunit_1_(COI)_gene_partial_cds_mitochondrial
CTATATCTAATCTTCGGCGCATGAGCCGGCATAGTTGGCACCGCACTTAGTCTCCTCATTCGCGCAGAACTAGGACAACCAGGCACTCTCCTGGGAGACGACCAAATCTACAACGTAATTGTTACAGCCCATGCTTTCGTAATAATTTTCTTTATAGTCATACCCATCATAATCGGAGGCTTTGGAAACTGATTAGTCCCCCTTATAATCGGCGCCCCCGACATAGCATTCCCACGAATAAACAACATAAGTTTTTGACTACTACCTCCATCTTTCCTCCTTCTTCTGGCTTCTTCCACAATCGAAGCTGGTGCAGGAACAGGGTGAACCGTATACCCTCCCCTAGCCGGCAACCTAGCCCACGCAGGAGCTTCCGTAGACCTTGCCATCTTCTCCCTCCATCTTGCCGGTGTCTCTTCCATCCTAGGGGCCATCAACTTTATCACAACTGCCATTAACATAAAACCACCAGCCCTCTCACAATACCAAACCCCCCTGTTCGTATGATCAGTCCTCATCACCGCCGTCCTCCTTCTCCTATCCCTCCCAGTCCTTGCCGCCGGCATTACAATACTGCTCACAGACCGGAACCTTAACACTACCTTCTTCGACCCTGCCGGTGGAGGCGACCCAGTATTATACCAACAC
>gi|197256197|gb|FJ027975.1|_Patagioenas_picazuro_voucher_MACN-Or-ct_1520_cytochrome_oxidase_subunit_1_(COI)_gene_partial_cds_mitochondrial
CTATATCTAATCTTCGGCGCATGAGCCGGCATAGTTGGCACCGCACTTAGTCTCCTCATTCGCGCAGAACTAGGACAACCAGGCACTCTCCTGGGAGACGACCAAATCTACAACGTAATTGTTACAGCCCATGCTTTCGTAATAATTTTCTTTATAGTCATACCCATCATAATCGGAGGCTTTGGAAACTGATTAGTCCCCCTTATAATCGGCGCCCCCGACATAGCATTCCCACGAATAAACAACATAAGTTTTTGACTACTACCTCCATCTTTCCTCCTTCTTCTGGCTTCTTCCACAATCGAAGCTGGTGCAGGAACAGGGTGAACCGTATACCCTCCCCTAGCCGGCAACCTAGCCCACGCAGGAGCTTCCGTAGACCTTGCCATCTTCTCCCTCCATCTTGCCGGTGTCTCTTCCATCCTAGGGGCCATCAACTTTATCACAACTGCCATTAACATAAAACCACCAGCCCTCTCACAATACCAAACCCCCCTGTTCGTATGATCAGTCCTCATCACCGCCGTCCTCCTTCTCCTATCCCTCCCAGTCCTTGCCGCCGGCATTACAATACTGCTCACAGACCGGAACCTTAACACTACCTTCTTCGACCCTGCCGGTGGAGGCGACCCAGTATTATACCAACAC
>gi|197256193|gb|FJ027973.1|_Patagioenas_maculosa_voucher_MACN-Or-ct_2762_cytochrome_oxidase_subunit_1_(COI)_gene_partial_cds_mitochondrial
CTATACCTAATCTTCGGCGCATGAGCCGGCATAGTTGGCACCGCACTTAGTCTCCTCATTCGTGCAGAACTAGGACAACCAGGCACTCTCCTGGGAGACGACCAAATCTACAATGTAATTGTTACAGCCCATGCTTTCGTAATAATTTTCTTTATAGTTATACCCATCATAATCGGAGGCTTTGGGAACTGATTAGTCCCCCTTATAATCGGCGCCCCTGACATAGCATTCCCACGAATAAACAACATAAGCTTTTGACTACTACCCCCATCTTTCCTACTCCTCCTGGCTTCTTCCACAGTCGAAGCTGGTGCAGGAACAGGGTGAACCGTATACCCTCCCCTAGCTGGCAACCTAGCCCACGCAGGAGCCTCCGTAGACCTTGCCATCTTCTCCCTCCATCTTGCTGGTGTCTCTTCCATCCTGGGGGCCATCAACTTTATCACAACTGCCATTAACATAAAACCACCAGCCCTCTCACAATACCAAACCCCCCTATTCGTATGATCAGTCCTCATCACCGCCGTCCTCCTTCTCCTATCCCTCCCAGTCCTTGCCGCCGGCATTACAATACTGCTCACAGACCGAAACCTCAACACTACCTTCTTCGACCCTGCTGGTGGAGGTGACCCAGTATTATACCAACAC
>gi|197256189|gb|FJ027971.1|_Patagioenas_maculosa_voucher_MACN-Or-ct_1693_cytochrome_oxidase_subunit_1_(COI)_gene_partial_cds_mitochondrial
CTATACCTAATCTTCGGCGCATGAGCCGGCATAGTTGGCACCGCACTTAGTCTCCTCATTCGTGCAGAACTAGGACAACCAGGCACTCTCCTGGGAGACGACCAAATCTACAATGTAATTGTTACAGCCCATGCTTTCGTAATAATTTTCTTTATAGTTATACCCATCATAATCGGAGGCTTTGGGAACTGATTAGTCCCCCTTATAATCGGCGCCCCTGACATAGCATTCCCACGAATAAACAACATAAGCTTTTGACTACTACCCCCATCTTTCCTACTCCTCCTGGCTTCTTCCACAGTCGAAGCTGGTGCAGGAACAGGGTGAACCGTATACCCTCCCCTAGCTGGCAACCTAGCCCACGCAGGAGCCTCCGTAGACCTTGCCATCTTCTCCCTCCATCTTGCTGGTGTCTCTTCCATCCTGGGGGCCATCAACTTTATCACAACTGCCATTAACATAAAACCACCAGCCCTCTCACAATACCAAACCCCCCTATTCGTATGATCAGTCCTCATCACCGCCGTCCTCCTTCTCCTATCCCTCCCAGTCCTTGCCGCCGGCATTACAATACTGCTCACAGACCGAAACCTCAACACTACCTTCTTCGACCCTGCTGGTGGAGGTGACCCAGTATTATACCAACAC
>gi|197256185|gb|FJ027969.1|_Patagioenas_araucana_voucher_MACN-Or-ct_2567_cytochrome_oxidase_subunit_1_(COI)_gene_partial_cds_mitochondrial
-------------------------------------------------------------------------------------------TAGGAGACGACCAAATCTACAACGTAATCGTTACAGCCCATGCTTTCGTAATAATCTTCTTTATGGTCATACCTATCATAATCGGAGGCTTTGGGAACTGATTAGTCCCCCTTATAATCGGCGCCCCCGATATAGCATTCCCACGAATGAACAACATAAGCTTTTGGCTATTACCCCCATCTTTCCTCCTTCTCCTAGCTTCTTCTACAGTCGAAGCTGGTGCAGGGACAGGATGAACTGTATATCCCCCTCTAGCCGGCAACCTAGCCCACGCAGGAGCCTCCGTAGATCTCGCCATCTTCTCCCTCCACCTTGCTGGTGTCTCCTCTATCCTAGGGGCCATCAACTTTATCACAACTGCCATCAACATAAAACCACCAGCCCTCTCACAATATCAAACCCCCCTATTCGTATGATCTGTCCTTATCACTGCCATCCTCCTTCTCCTATCCCTTCCAGTTCTTGCCGCCGGCATCACAATACTGCTCACAGACCGAAACCTCAACACCACCTTNTTCGACCCTGCCGGCGGAGGCGACCCAGTACTATATCAACAT
>gi|197256181|gb|FJ027967.1|_Patagioenas_araucana_voucher_MACN-Or-ct_607_cytochrome_oxidase_subunit_1_(COI)_gene_partial_cds_mitochondrial
CTATACCTAATCTTTGGTGCATGAGCTGGCATAGTTGGCACCGCACTTAGCCTCCTCATTCGCGCAGAACTAGGACAACCCGGCACTCTCCTAGGAGACGACCAAATCTACAACGTAATCGTTACAGCCCATGCTTTCGTAATAATCTTCTTTATGGTCATACCTATCATAATCGGAGGCTTTGGGAACTGATTAGTCCCCCTTATAATCGGCGCCCCCGATATAGCATTCCCACGAATGAACAACATAAGCTTTTGGCTATTACCCCCATCTTTCCTCCTTCTCCTAGCTTCTTCTACAGTCGAAGCTGGTGCAGGGACAGGATGAACTGTATATCCCCCTCTAGCCGGCAACCTAGCCCACGCAGGAGCCTCCGTAGATCTCGCCATCTTCTCCCTCCACCTTGCTGGTGTCTCCTCTATCCTAGGGGCCATCAACTTTATCACAACTGCCATCAACATAAAACCACCAGCCCTCTCACAATATCAAACCCCCCTATTCGTATGATCTGTCCTTATCACTGCCATCCTCCTTCTCCTATCCCTTCCAGTTCTTGCCGCCGGCATCACAATACTGCTCACAGACCGAAACCTCAACACCACCTTCTTCGACCCTGCCGGCGGAGGCGACCCAGTACTATATCAACAT
>gi|197256177|gb|FJ027965.1|_Passer_domesticus_voucher_MACN-Or-ct_1896_cytochrome_oxidase_subunit_1_(COI)_gene_partial_cds_mitochondrial
CTGTACNTAATNTTCGGCGCATGAGCCGGGATAGTAGGTACCGCCCTAAGCTTACTTATCCGAGCAGAACTTGGACAACCAGGGGCTCTCCTAGGAGATGACCAAGTTTACAACGTAGTTGTCACAGCCCATGCTTTCGTGATAATCTTCTTCATAGTTATGCCAATTATAATTGGGGGATTCGGAAACTGACTAGTCCCACTGATAATTGGAGCACCAGACATAGCATTCCCACGAATAAACAACATAAGCTTCTGACTGCTACCCCCATCCTTCCTCCTGCTACTAGCATCCTCCACCGTAGAAGCGGGGGCCGGCACCGGATGAACAGTATACCCCCCTCTAGCCGGCAACCTGGCCCACGCCGGAGCCTCAGTAGACCTAGCAATCTTCTCCCTGCACTTAGCAGGTATTTCTTCAATCTTAGGGGCAATCAACTTTATTACAACAGCAATCAACATAAAACCCCCTGCCCTATCACAATACCAAACACCCCTATTCGTCTGATCAGTACTAATCACCGCAGTGCTACTGCTCCTATCGCTACCAGTTCTTGCTGCAGGAATTACAATGCTACTCACCGACCGCAACCTCAACACCACATTCTTCGACCCCGCAGGAGGAGGAGATCCAGTCCTATACCAACAT
>gi|197256173|gb|FJ027963.1|_Passer_domesticus_voucher_MACN-Or-ct_1826_cytochrome_oxidase_subunit_1_(COI)_gene_partial_cds_mitochondrial
CTGTACNTAATNTTCGGCGCATGAGCCGGGATAGTAGGTACCGCCCTAAGCTTACTTATCCGAGCAGAACTTGGACAACCAGGGGCTCTCCTAGGAGATGACCAAGTTTACAACGTAGTTGTCACAGCCCATGCTTTCGTGATAATCTTCTTCATAGTTATGCCAATTATAATTGGGGGATTCGGAAACTGACTAGTCCCACTGATAATTGGAGCACCAGACATAGCATTCCCACGAATAAACAACATAAGCTTCTGACTGCTACCCCCATCCTTCCTCCTGCTACTAGCATCCTCCACCGTAGAAGCGGGGGCCGGCACCGGATGAACAGTATACCCCCCTCTAGCCGGCAACCTGGCCCACGCCGGAGCCTCAGTAGACCTAGCAATCTTCTCCCTGCACTTAGCAGGTATTTCTTCAATCTTAGGGGCAATCAACTTTATTACAACAGCAATCAACATAAAACCCCCTGCCCTATCACAATACCAAACACCCCTATTCGTCTGATCAGTACTAATCACCGCAGTGCTACTGCTCCTATCGCTACCAGTTCTTGCTGCAGGAATTACAATGCTACTCACCGACCGCAACCTCAACACCACATTCTTCGACCCCGCAGGAGGAGGAGATCCAGTCCTATACCAACAT
>gi|197256169|gb|FJ027961.1|_Passer_domesticus_voucher_MACN-Or-ct_624_cytochrome_oxidase_subunit_1_(COI)_gene_partial_cds_mitochondrial
CTGTACNTAATNTTCGGCGCATGAGCCGGGATAGTAGGTACCGCCCTAAGCTTACTTATCCGAGCAGAACTTGGACAACCAGGGGCTCTCCTAGGAGATGACCAAGTTTACAACGTAGTTGTCACAGCCCATGCTTTCGTGATAATCTTCTTCATAGTTATGCCAATTATAATTGGGGGATTCGGAAACTGACTAGTCCCACTGATAATTGGAGCACCAGACATAGCATTCCCACGAATAAACAACATAAGCTTCTGACTGCTACCCCCATCCTTCCTCCTGCTACTAGCATCCTCCACCGTAGAAGCGGGGGCCGGCACCGGATGAACAGTATACCCCCCTCTAGCCGGCAACCTGGCCCACGCCGGAGCCTCAGTAGACCTAGCAATCTTCTCCCTGCACTTAGCAGGTATTTCTTCAATCTTAGGGGCAATCAACTTTATTACAACAGCAATCAACATAAAACCCCCTGCCCTATCACAATACCAAACACCCCTATTCGTCTGATCAGTACTAATCACCGCAGTGCTACTGCTCCTATCGCTACCAGTTCTTGCTGCAGGAATTACAATGCTACTCACCGACCGCAACCTCAACACCACATTCTTCGACCCCGCAGGAGGAGGAGATCCAGTCCTATACCAACAT
>gi|197256165|gb|FJ027959.1|_Parula_pitiayumi_voucher_MACN-Or-ct_3247_cytochrome_oxidase_subunit_1_(COI)_gene_partial_cds_mitochondrial
------------------------------------------------------------------------GGCCAACCCGGAGCCCTTCTGGGAGACGACCAAGTCTACAACGTAGTTGTCACGGCCCATGCCTTTGTAATAATTTTCTTTATAGTCATGCCTATTATAATCGGGGGGTTCGGAAACTGACTGGTCCCCCTAATAATCGGAGCCCCAGACATAGCATTCCCACGAATAAACAACATAAGCTTCTGACTACTCCCACCATCATTCCTTCTCCTCTTAGCATCCTCCACAGTTGAAGCAGGCGTAGGAACGGGCTGAACAGTGTACCCTCCACTAGCTGGCAATCTAGCCCACGCCGGAGCCTCGGTCGACCTCGCAATCTTCTCCCTACACCTAGCCGGTATCTCCTCAATCCTTGGGGCAATCAACTTTATTACAACAGCAATTAACATGAAACCCCCTGCCCTGTCACAATACCAAACCCCACTATTCGTCTGATCAGTCCTAATCACAGCAGTCCTCCTACTCCTTTCCCTTCCTGTCCTAGCTGCAGGAATCACAATGCTCCTTACAGACCGCAACCTCAACACCACATTCTTCGACCCTGCTGGAGGAGGAGATCCCGTCCTATATCAACAT
>gi|197256161|gb|FJ027957.1|_Parula_pitiayumi_voucher_MACN-Or-ct_1711_cytochrome_oxidase_subunit_1_(COI)_gene_partial_cds_mitochondrial
CTATACCTAATTTTCGGCGCATGAGCCGGAATAGTGGGTACCGCCCTAAGCCTCCTCATTCGAGCAGAACTAGGCCAACCCGGAGCCCTTCTGGGAGACGACCAAGTCTACAACGTAGTTGTCACGGCCCATGCCTTCGTAATAATTTTCTTTATAGTCATGCCTATTATAATCGGGGGGTTCGGAAACTGACTGGTCCCCCTAATAATCGGAGCCCCAGACATAGCATTCCCACGAATAAACAACATAAGCTTCTGACTACTCCCACCATCATTCCTTCTCCTCTTAGCATCCTCCACAGTTGAAGCAGGCGTAGGAACGGGCTGAACAGTGTACCCTCCACTAGCTGGCAATCTAGCCCACGCCGGAGCCTCGGTCGACCTCGCAATCTTCTCCCTACACCTAGCCGGTATCTCCTCAATCCTTGGGGCAATCAACTTTATTACAACAGCAATTAACATGAAACCCCCTGCCCTATCACAATACCAAACCCCACTATTCGTCTGATCAGTCCTAATCACAGCAGTCCTCCTACTCCTTTCCCTTCCTGTCCTAGCTGCAGGAATCACAATGCTCCTTACAGACCGCAACCTCAACACCACATTCTTCGACCCTGCTGGAGGAGGAGATCCCGTCCTATATCAACAT
>gi|197256157|gb|FJ027955.1|_Parula_pitiayumi_voucher_MACN-Or-ct_997_cytochrome_oxidase_subunit_1_(COI)_gene_partial_cds_mitochondrial
CTATACCTAATTTTCGGCGCATGAGCCGGAATAGTGGGTACCGCCCTAAGCCTCCTCATTCGAGCAGAACTAGGCCAACCCGGAGCCCTTCTGGGAGACGACCAAGTCTACAACGTAGTTGTCACGGCCCATGCCTTTGTAATAATTTTCTTTATAGTCATGCCTATTATAATCGGGGGGTTCGGAAACTGACTGGTCCCCCTAATAATCGGAGCCCCAGACATAGCATTCCCACGAATAAACAACATAAGCTTCTGACTACTCCCACCATCATTCCTTCTCCTCTTAGCATCCTCCACAGTTGAAGCAGGCGTAGGAACGGGCTGAACAGTGTACCCTCCACTAGCTGGCAATCTAGCCCACGCCGGAGCCTCGGTCGACCTCGCAATCTTCTCCCTACACCTAGCCGGTATCTCCTCAATCCTTGGGGCAATCAACTTTATTACAACAGCAATTAACATGAAACCCCCTGCCCTATCACAATACCAAACCCCACTATTCGTCTGATCAGTCCTAATCACAGCAGTCCTCCTACTCCTTTCCCTTCCTGTCCTAGCTGCAGGAATCACAATGCTCCTTACAGACCGCAACCTCAACACCACATTCTTCGACCCTGCTGGAGGAGGAGATCCCGTCCTATATCAACAT
>gi|197256153|gb|FJ027953.1|_Parula_pitiayumi_voucher_MACN-Or-ct_1001_cytochrome_oxidase_subunit_1_(COI)_gene_partial_cds_mitochondrial
CTATACCTAATTTTCGGCGCATGAGCCGGAATAGTGGGTACCGCCCTAAGCCTCCTCATTCGAGCAGAACTAGGCCAACCCGGAGCCCTTCTGGGAGACGACCAAGTCTACAACGTAGTTGTCACGGCCCATGCCTTCGTAATAATTTTCTTTATAGTCATGCCTATTATAATCGGGGGGTTCGGAAACTGACTGGTCCCCCTAATAATCGGAGCCCCAGACATAGCATTCCCACGAATAAACAACATAAGCTTCTGACTACTCCCACCATCATTCCTTCTCCTCTTAGCATCCTCCACAGTTGAAGCAGGCGTAGGAACGGGCTGAACAGTGTACCCTCCACTAGCTGGCAATCTAGCCCACGCCGGAGCCTCGGTCGACCTCGCAATCTTCTCCCTACACCTAGCCGGTATCTCCTCAATCCTTGGGGCAATCAACTTTATTACAACAGCAATTAACATGAAACCCCCTGCCCTATCACAATACCAAACCCCACTATTCGTCTGATCAGTCCTAATCACAGCAGTCCTCCTACTCCTTTCCCTTCCTGTCCTAGCTGCAGGAATCACAATGCTCCTTACAGACCGCAACCTCAACACCACATTCTTCGACCCTGCTGGAGGAGGAGATCCCGTCCTATATCAACAT
>gi|197256149|gb|FJ027951.1|_Paroaria_coronata_voucher_MACN-Or-ct_3188_cytochrome_oxidase_subunit_1_(COI)_gene_partial_cds_mitochondrial
------------TTCGGCGCATGAGCCGGAATGGTAGGTACTGCCCTAAGCCTCCTCATCCGAGCAGAACTAGGCCAACCTGGAGCCCTCCTAGGAGACGACCAAGTCTACAACGTAGTCGTCACGGCCCATGCTTTCGTAATAATTTTCTTCATAGTTATACCAATTATAATCGGAGGGTTCGGAAACTGACTAGTCCCCCTAATAATTGGAGCCCCAGACATAGCATTCCCACGAATAAACAACATAAGCTTCTGACTACTGCCCCCATCCTTCCTTCTCCTCCTAGCATCCTCCACAGTTGAAGCAGGAGCCGGCACAGGCTGAACAGTATACCCCCCACTAGCCGGCAACCTGGCCCACGCCGGAGCTTCAGTTGACCTCGCAATCTTCTCCCTCCACCTAGCTGGAATCTCCTCAATCCTAGGAGCAATCAACTTTATCACAACAGCCATCAACATGAAACCTCCTGCCCTCTCACAATACCAAACCCCCCTATTTGTGTGATCAGTCCTAATCACCGCAGTACTACTACTACTATCCCTACCAGTCCTAGCCGCAGGGATCACAATACTCCTAACAGACCGCAACCTCAACACTACATTCTTCGACCCTGCTGGAGGAGGAGACCCTGTCCTGTACCAACAC
>gi|197256145|gb|FJ027949.1|_Paroaria_coronata_voucher_MACN-Or-ct_1418_cytochrome_oxidase_subunit_1_(COI)_gene_partial_cds_mitochondrial
CTGTACCTGATTTTCGGCGCATGAGCCGGAATGGTAGGTACTGCCCTAAGCCTCCTCATCCGAGCAGAACTAGGCCAACCTGGAGCCCTCCTAGGAGACGACCAAGTCTACAACGTAGTCGTCACGGCCCATGCTTTCGTAATAATTTTCTTCATAGTTATGCCAATTATAATCGGAGGGTTCGGAAACTGACTAGTCCCCCTAATAATTGGAGCCCCAGACATAGCATTCCCACGAATAAACAACATAAGCTTCTGACTACTGCCCCCATCCTTCCTTCTCCTCCTAGCATCCTCCACAGTTGAAGCAGGAGCCGGCACAGGCTGAACAGTATACCCCCCACTAGCCGGCAACCTGGCCCACGCCGGAGCTTCAGTTGACCTCGCAATCTTCTCCCTCCACCTAGCTGGAATCTCCTCAATCCTAGGAGCAATCAACTTTATCACAACAGCCATCAACATGAAACCTCCTGCCCTCTCACAATACCAAACCCCCCTATTTGTGTGATCAGTCCTAATCACCGCAGTACTACTACTACTATCCCTACCAGTCCTAGCCGCAGGGATCACAATACTCCTAACAGACCGCAACCTCAACACTACATTCTTCGACCCTGCTGGAGGAGGAGACCCTGTCCTGTACCAACAC
>gi|197256141|gb|FJ027947.1|_Paroaria_capitata_voucher_MACN-Or-ct_3216_cytochrome_oxidase_subunit_1_(COI)_gene_partial_cds_mitochondrial
-------TGATTTTCGGCGCATGAGCCGGAATGGTAGGTACTGCCCTAAGCCTCCTCATCCGAGCAGAATTAGGCCAACCTGGAGCCCTCCTAGGAGATGACCAAGTCTACAACGTGGTCGTCACGGCCCATGCTTTCGTAATAATCTTCTTCATAGTTATACCAATCATAATCGGAGGGTTCGGAAACTGACTAGTTCCCCTAATAATCGGAGCCCCAGACATAGCATTCCCACGAATAAACAACATAAGCTTCTGATTACTACCCCCATCCTTCCTTCTCCTCCTAGCATCCTCCACAGTTGAAGCAGGAGTTGGTACAGGCTGAACAGTATACCCCCCACTAGCCGGCAACCTAGCCCACGCCGGAGCCTCGGTCGATCTAGCAATTTTCTCCCTCCACCTGGCCGGAATCTCCTCAATCCTAGGTGCAATCAACTTTATCACAACAGCCATCAACATAAAACCTCCTGCCCTCTCACAATATCAAACCCCCCTATTTGTGTGATCAGTCCTAATCACCGCCGTCCTACTCCTACTATCCTTACCAGTCCTAGCCGCAGGAATCACAATACTCCTAACAGACCGCAACCTCAACACCACATTCTTCGACCCTGCTGGAGGAGGAGACCCTGTCCTGTACCAACAT
>gi|197256137|gb|FJ027945.1|_Paroaria_capitata_voucher_MACN-Or-ct_2112_cytochrome_oxidase_subunit_1_(COI)_gene_partial_cds_mitochondrial
----------------GCGCATGAGCCGGAATGGTAGGTACTGCCCTAAGCCTCCTCATCCGAGCAGAATTAGGCCAACCTGGAGCCCTCCTAGGAGATGACCAAGTCTACAACGTGGTCGTCACGGCCCATGCTTTCGTAATAATCTTCTTCATAGTTATACCAATCATAATCGGAGGGTTCGGAAACTGACTAGTTCCCCTAATAATCGGAGCCCCAGACATAGCATTCCCACGAATAAACAACATAAGCTTCTGATTACTACCCCCATCCTTCCTTCTCCTCCTAGCATCCTCCACAGTTGAAGCAGGAGTTGGTACAGGCTGAACAGTATACCCCCCACTAGCCGGCAACCTAGCCCACGCCGGAGCCTCGGTCGATCTAGCAATTTTCTCCCTCCACCTGGCCGGAATCTCCTCAATCCTAGGTGCAATCAACTTTATCACAACAGCCATCAACATAAAACCTCCTGCCCTCTCACAATATCAAACCCCCCTATTTGTGTGATCAGTCCTAATCACCGCCGTCCTACTCCTACTATCCTTACCAGTCCTAGCCGCAGGAATCACAATACTCCTAACAGACCGCAACCTCAACACCACATTCTTCGACCCTGCTGGAGGAGGAGACCCTGTCCTGTACCAACAT
>gi|197256133|gb|FJ027943.1|_Paroaria_capitata_voucher_MACN-Or-ct_1452_cytochrome_oxidase_subunit_1_(COI)_gene_partial_cds_mitochondrial
CTGTACCTGATTTTCGGCGCATGAGCCGGAATGGTAGGTACTGCCCTAAGCCTCCTCATCCGAGCAGAATTAGGCCAACCTGGAGCCCTCCTAGGAGATGACCAAGTCTACAACGTGGTCGTCACGGCCCATGCTTTCGTAATAATCTTCTTCATAGTTATACCAATCATAATCGGAGGGTTCGGAAACTGACTAGTTCCCCTAATAATCGGAGCCCCAGACATAGCATTCCCACGAATAAACAACATAAGCTTCTGATTACTACCCCCATCCTTCCTTCTCCTCCTAGCATCCTCCACAGTTGAAGCAGGAGTTGGTACAGGCTGAACAGTATACCCCCCACTAGCCGGCAACCTAGCCCACGCCGGAGCCTCGGTCGATCTAGCAATTTTCTCCCTCCACCTGGCCGGAATCTCCTCAATCCTAGGTGCAATCAACTTTATCACAACAGCCATCAACATAAAACCTCCTGCCCTCTCACAATATCAAACCCCCCTATTTGTGTGATCAGTCCTAATCACCGCCGTCCTACTCCTACTATCCTTACCAGTCCTAGCCGCAGGAATCACAATACTCCTAACAGACCGCAACCTCAACACCACATTCTTCGACCCTGCTGGAGGAGGAGACCCTGTCCTGTACCAACAT
>gi|197256129|gb|FJ027941.1|_Paroaria_capitata_voucher_MACN-Or-ct_1406_cytochrome_oxidase_subunit_1_(COI)_gene_partial_cds_mitochondrial
CTGTACCTGATTTTCGGCGCATGAGCCGGAATGGTAGGTACTGCCCTAAGCCTCCTCATCCGAGCAGAATTAGGCCAACCTGGAGCCCTCCTAGGAGATGACCAAGTCTACAACGTGGTCGTCACGGCCCATGCTTTCGTAATAATCTTCTTCATAGTTATACCAATCATAATCGGAGGGTTCGGAAACTGACTAGTTCCCCTAATAATCGGAGCCCCAGACATAGCATTCCCACGAATAAACAACATAAGCTTCTGATTACTACCCCCATCCTTCCTTCTCCTCCTAGCATCCTCCACAGTTGAAGCAGGAGTTGGTACAGGCTGAACAGTATACCCCCCACTAGCCGGCAACCTAGCCCACGCCGGAGCCTCGGTCGATCTAGCAATTTTCTCCCTCCACCTGGCCGGAATCTCCTCAATCCTAGGTGCAATCAACTTTATCACAACAGCCATCAACATAAAACCTCCTGCCCTCTCACAATATCAAACCCCCCTATTTGTGTGATCAGTCCTAATCACCGCCGTCCTACTCCTACTATCCTTACCAGTCCTAGCCGCAGGAATCACAATACTCCTAACAGACCGCAACCTCAACACCACATTCTTCGACCCTGCTGGAGGAGGAGACCCTGTCCTGTACCAACAT
>gi|197256125|gb|FJ027939.1|_Parabuteo_unicinctus_voucher_MACN-Or-ct_147_cytochrome_oxidase_subunit_1_(COI)_gene_partial_cds_mitochondrial
CTATACCTAATCTTCGGCGCCTGAGCTGGTATAGTCGGCACCGCCCTCAGCTTACTCATCCGTGCAGAACTCGGCCAACCCGGCACACTCCTAGGTGACGACCAAATTTATAACGTAATCGTTACCGCACATGCCTTCGTAATAATCTTCTTCATAGTTATACCAATCATGATCGGAGGATTCGGAAACTGACTTGTTCCACTCATAATTGGCGCTCCCGACATAGCCTTTCCACGCATAAACAACATAAGCTTCTGACTACTCCCCCCATCCTTCCTCCTCCTACTAGCTTCCTCAACAGTAGAAGCAGGAGCCGGTACTGGATGAACTGTCTATCCTCCCTTAGCTGGCAACATAGCCCATGCCGGAGCTTCAGTAGACCTAGCCATCTTCTCTCTACACTTAGCCGGAGTTTCATCCATTCTAGGAGCGATCAACTTCATCACAACCGCCATCAATATAAAACCCCCAGCACTCTCCCAGTACCAAACACCCCTGTTTGTATGATCTGTACTCATCACTGCCGTCCTTCTACTACTCTCACTCCCAGTCCTAGCCGCTGGCATCACTATACTACTTACAGACCGAAACCTAAACACAACATTCTTTGACCCTGCCGGCGGAGGCGATCCCATCCTCTACCAACAT
>gi|197256121|gb|FJ027937.1|_Pachyramphus_viridis_voucher_MACN-Or-ct_3239_cytochrome_oxidase_subunit_1_(COI)_gene_partial_cds_mitochondrial
CTNTATNTAATTTTTGGTGCTTGAGCCGGTATAATCGGTACAGCCCTAAGCCTTCTTATTCGAGCAGAACTCGGACAACCAGGAACCCTCCTAGGAGACGATCAGATCTATAATGTAATCGTCACCGCCCACGCCTTCGTAATAATCTTTTTTATAGTCATGCCAATTATAATCGGAGGATTTGGCAACTGACTAGTACCCTTAATAATTGGCGCTCCAGATATAGCCTTCCCACGTATAAACAACATAAGCTTCTGACTCCTTCCACCATCTTTCCTACTCCTCCTTGCTTCATCTACAGTAGAAGCTGGAGTAGGCACAGGGTGAACTGTATACCCTCCACTAGCCGGCAACTTAGCACATGCCGGAGCTTCAGTAGACCTTGCTATCTTCTCGCTCCATCTTGCAGGAATTTCTTCTATTCTAGGAGCAATCAATTTCATTACTACCGCAATCAACATGAAGCCCCCCGCTCTCTCACAATATCAAACCCCCTTATTCGTATGGTCTGTCCTAATTACTGCAGTACTACTACTCCTCTCCCTCCCAGTCCTTGCCGCCGGCATCACAATACTTTTAACGGACCGTAACCTAAACACCACATTCTTTGACCCCGCAGGTGGTGGAGACCCAGTCCTATACCAACAC
>gi|197256117|gb|FJ027935.1|_Pachyramphus_validus_voucher_MACN-Or-ct_1131_cytochrome_oxidase_subunit_1_(COI)_gene_partial_cds_mitochondrial
CTCTATTTGATTTTCGGTGCCTGAGCCGGAATGATCGGCACAGCCTTAAGCCTTCTCATTCGAGCAGAACTCGGACAACCAGGAACCCTCCTGGGAGACGACCAAATTTACAATGTAATTGTCACCGCCCATGCTTTCGTAATAATCTTTTTTATAGTAATACCTATTATAATCGGAGGATTTGGTAACTGACTAGTCCCCCTAATAATCGGTGCCCCCGACATAGCCTTCCCACGTATAAACAACATAAGTTTCTGACTTCTCCCCCCATCCTTCCTACTTCTCCTTGCATCCTCCACAGTAGAAGCCGGAGTAGGTACAGGATGAACCGTCTACCCCCCACTAGCTGGTAACCTAGCACATGCTGGAGCTTCAGTAGACCTGGCTATCTTCTCACTTCATCTCGCAGGGGTCTCTTCTATCCTAGGAGCAATCAACTTCATCACCACCGCAATCAACATGAAACCTCCTGCTCTCTCACAATATCAAACCCCTCTATTCGTCTGATCCGTCCTAATTACAGCAGTATTACTCCTCCTTTCCCTCCCAGTCCTCGCCGCTGGCATCACAATACTTCTAACCGACCGTAACCTAAACACCACATTCTTTGACCCTGCAGGGGGAGGTGACCCAGTCCTATATCAACAC
>gi|197256113|gb|FJ027933.1|_Pachyramphus_polychopterus_voucher_MACN-Or-ct_2087_cytochrome_oxidase_subunit_1_(COI)_gene_partial_cds_mitochondrial
NTTTACTTAATCTTTGGCGCCTGAGCCGGCATGATTGGTACAGCCCTGAGCCTCCTCATTCGAGCGGAACTTGGACAACCAGGAACCCTCCTAGGAGACGATCAAATCTACAATGTAATCGTTACCGCCCATGCCTTTGTAATAATCTTTTTTATAGTTATGCCCATTATAATTGGAGGGTTCGGTAACTGACTAGTCCCCCTAATAATTGGTGCCCCCGACATGGCCTTCCCGCGTATAAATAACATAAGCTTTTGACTCCTCCCTCCATCCTTTCTACTCCTTCTAGCTTCATCTACAGTAGAAGCCGGAGTAGGCACAGGATGAACCGTATACCCACCACTAGCTGGTAATCTAGCACATGCTGGAGCTTCAGTAGATCTAGCTATCTTCTCACTTCACCTGGCAGGGGTTTCTTCTATCCTAGGAGCTATCAACTTCATCACTACAGCAATCAACATGAAACCTCCCGCCCTATCACAATACCAAACTCCCCTATTCGTATGATCCGTCCTAATTACCGCAGTACTACTCCTCCTTTCTCTCCCAGTCCTTGCTGCTGGCATTACAATACTCCTAACCGACCGTAACCTAAACACAACATTCTTTGACCCAGCAGGAGGTGGTGACCCAGTCCTATATCAACAC
>gi|197256109|gb|FJ027931.1|_Oxyura_ferruginea_voucher_MACN-Or-ct_1238_cytochrome_oxidase_subunit_1_(COI)_gene_partial_cds_mitochondrial
CTGTATCTTATCTTTGGGGCATGAGCAGGAATGATCGGCACCGCACTCAGCCTGCTAATTCGCGCAGAACTGGGTCAACCAGGAACTCTTCTAGGGGACGACCAGATCTACAACGTAATTGTCACCGCCCATGCCTTCGTAATGATCTTCTTCATGGTTATGCCAATCATAATCGGGGGATTCGGCAACTGACTAGTCCCTCTCATAATCGGCGCCCCTGATATGGCATTCCCTCGAATGAACAACATAAGCTTCTGACTCCTCCCACCTTCATTCCTCCTATTATTAGCCTCATCCACCGTAGAAGCCGGTGCCGGCACAGGGTGAACCGTCTATCCTCCCCTGGCAGGCAACCTAGCCCACGCCGGAGCCTCAGTAGACCTGGCCATCTTCTCCCTTCACCTAGCTGGTGTCTCGTCCATCCTCGGAGCCATCAATTTCATCACCACAGCCATCAACATAAAACCCCCCGCACTCTCACAATACCAAACACCCCTATTCGTCTGATCCGTCCTAATCACTGCCATCCTACTCCTCCTATCGCTCCCCGTACTAGCCGCCGGCATCACAATACTACTCACTGACCGAAACCTAAACACTACGTTCTTTGACCCTGCAGGAGGGGGAGACCCAATCCTGTATCAACAC
>gi|197256105|gb|FJ027929.1|_Oryzoborus_angolensis_voucher_MACN-Or-ct_2888_cytochrome_oxidase_subunit_1_(COI)_gene_partial_cds_mitochondrial
CTGTACTTAATCTTCGGCGCATGAGCCGGAATAGTAGGTACAGCCCTAAGCCTCCTCATCCGAGCAGAATTAGGTCAACCTGGAGCCCTCCTCGGAGACGACCAAGTCTACAACGTAATCGTCACAGCCCATGCTTTCGTAATAATTTTCTTCATAGTTATGCCGATTATAATCGGAGGATTCGGAAACTGATTAGTCCCCTTAATAATTGGAGCCCCTGATATAGCATTCCCACGAATGAACAATATAAGCTTCTGGCTTCTTCCCCCATCCTTCCTTCTCCTCCTGGCTTCCTCTACAGTAGAAGCGGGAGTTGGCACAGGTTGAACAGTATACCCCCCACTAGCCGGCAACCTGGCCCACGCCGGAGCCTCAGTCGACCTTGCAATCTTCTCCCTACACCTAGCCGGTATCTCTTCAATCCTAGGGGCAATCAACTTCATTACAACAGCAGTCAACATGAAACCCCCCGCTCTCTCACAATACCAAACCCCCCTATTCGTTTGATCCGTACTAATCACCGCAGTCCTGCTACTTCTATCTCTTCCAGTCCTTGCTGCAGGAATCACAATACTCCTTACAGACCGTAACCTCAACACAACATTCTTCGACCCCGCTGGAGGAGGAGACCCCATCCTATATCAACAC
>gi|197256101|gb|FJ027927.1|_Oreotrochilus_leucopleurus_voucher_MACN-Or-ct_2613_cytochrome_oxidase_subunit_1_(COI)_gene_partial_cds_mitochondrial
-----------------GGCATGAGCTGGAATAGTTGGAACCGCCCTCAGCCTGTTAATCCGAGCAGAACTAGGCCAACCGGGCACCCTACTAGGAGACGACCAAATCTACAACGTAATTGTCACCGCCCACGCCTTCGTAATAATTTTCTTCATGGTCATGCCAATCATAATCGGAGGTTTTGGAAACTGACTAGTCCCCCTAATAATTGGAGCCCCCGACATGGCATTCCCCCGCATAAACAACATAAGCTTCTGACTCCTGCCACCATCATTCCTACTGCTCCTCGCCTCCTCCACTGTAGAAGCAGGTGCAGGCACAGGATGAACCGTCTACCCTCCCCTAGCCGGCAACCTAGCCCACGCAGGCGCATCAGTAGACCTCGCCATTTTCTCTCTGCATCTATCCGGCATCTCATCAATCCTAGGAGCTATTAACTTTATCACCACCGCAATCAACATGAAACCACCCGCCCTCTCACAATACCAAACACCCCTATTTGTCTGATCCGTCCTTATTACTGCTGTCTTACTTCTCCTCTCACTCCCAGTGCTCGCCGCCGGAATTACCATACTACTCACAGATCGAAACCTAAACACCACATTCTTCGACCCAGCTGGAGGAGGAGACCCCATCTTATACCAACAC
>gi|197256097|gb|FJ027925.1|_Oreotrochilus_leucopleurus_voucher_MACN-Or-ct_1007_cytochrome_oxidase_subunit_1_(COI)_gene_partial_cds_mitochondrial
CTCTACTTAATCTTCGGGGCATGAGCTGGAATAGTTGGAACCGCCCTCAGCCTGTTAATCCGAGCAGAACTAGGCCAACCGGGCACCCTACTAGGAGACGACCAAATCTACAACGTAATTGTCACCGCCCACGCCTTCGTAATAATTTTCTTCATGGTCATGCCAATCATAATCGGAGGTTTTGGAAACTGACTAGTCCCCCTAATAATTGGAGCCCCCGACATGGCATTCCCCCGCATAAACAACATAAGCTTCTGACTCCTGCCACCATCATTCCTACTGCTCCTCGCCTCCTCCACTGTAGAAGCAGGTGCAGGCACAGGATGAACCGTCTACCCTCCCCTAGCCGGCAACCTAGCCCACGCAGGCGCATCAGTAGACCTCGCCATTTTCTCTCTGCATCTATCCGGCATCTCATCAATCCTAGGAGCTATTAACTTTATCACCACCGCAATCAACATGAAACCACCCGCCCTCTCACAATACCAAACACCCCTATTTGTCTGATCCGTCCTTATTACTGCTGTCTTACTTCTCCTCTCACTCCCAGTGCTCGCCGCCGGAATTACCATACTACTCACAGATCGAAACCTAAACACCACATTCTTCGACCCAGCTGGAGGAGGAGACCCCATCTTATACCAACAC
>gi|197256093|gb|FJ027923.1|_Oreopholus_ruficollis_voucher_MACN-Or-ct_1926_cytochrome_oxidase_subunit_1_(COI)_gene_partial_cds_mitochondrial
CTATACCTGATCTTCGGTGCATGAGCTGGTATAGTTGGTACCGCCCTCAGCCTACTCATCCGTGCAGAACTAGGCCAACCCGGAACCCTACTAGGTGATGACCAAATCTACAATGTAATCGTCACCGCCCATGCTTTCGTAATAATTTTCTTCATAGTTATGCCAATCATAATTGGTGGCTTTGGCAATTGACTAGTCCCACTCATAATCGGCGCACCCGACATAGCATTCCCACGTATAAACAACATAAGCTTCTGACTTCTACCCCCATCATTCCTTCTTCTTCTTGCTTCTTCCACAGTAGAAGCTGGAGCAGGTACAGGATGAACTGTATACCCACCCCTAGCTGGTAACCTAGCCCATGCTGGAGCTTCAGTAGACCTAGCTATCTTCTCCCTTCACTTAGCAGGTGTATCCTCCATCTTAGGTGCAATCAACTTTATCACAACTGCCATCAATATAAAACCACCTGCCCTATCCCAATATCAAACCCCATTATTCGTATGATCCGTTCTTATCACCGCCGTCCTACTACTCCTTTCACTCCCAGTCCTCGCTGCAGGCATCACCATACTACTAACAGATCGAAACCTAAACACTACATTCTTTGACCCAGCTGGAGGAGGTGACCCAGTCCTATACCAACAC
>gi|197256089|gb|FJ027921.1|_Upucerthia_certhioides_voucher_MACN-Or-ct_1905_cytochrome_oxidase_subunit_1_(COI)_gene_partial_cds_mitochondrial
CTTTACCTAATTTTTGGAGCATGAGCTGGCATAATTGGAACAGCCCTCAGCCTCTTAATCCGAGCTGAACTTGGGCAACCAGGTACCCTCCTAGGTGATGACCAAATTTATAATGTAATCGTCACTGCTCATGCCTTCGTAATGATCTTCTTTATAGTTATACCTATTATAATCGGTGGCTTTGGTAACTGATTAGTTCCACTGATAATTGGAGCCCCAGACATAGCTTTTCCCCGAATAAATAACATAAGCTTCTGACTTTTACCCCCATCCTTCCTACTTCTTTTAGCCTCCTCAACAGTAGAAGCCGGAGTAGGAACAGGATGAACAGTTTATCCTCCACTAGCTGGCAACCTAGCTCACGCTGGAGCCTCAGTAGACCTAGCTATCTTCTCTCTTCACCTAGCCGGTGTATCCTCTATCCTGGGAGCTATCAACTTCATTACAACCGCAATCAACATAAAACCACCTACCCTATCACAATACCAAACCCCATTATTTGTTTGATCTGTCCTTATCACTGCCGTCTTACTTCTACTTTCACTTCCCGTCCTAGCTGCCGGCATCACAATACTACTAACAGATCGTAACTTAAATACTACATTCTTCGACCCTGCAGGAGGTGGAGATCCAGTTTTATACCAACAC
>gi|197256085|gb|FJ027919.1|_Upucerthia_certhioides_voucher_MACN-Or-ct_2789_cytochrome_oxidase_subunit_1_(COI)_gene_partial_cds_mitochondrial
CTTTACCTAATTTTTGGAGCATGAGCTGGCATAATTGGAACAGCCCTCAGCCTCTTAATCCGAGCTGAACTTGGGCAACCAGGTACCCTCCTAGGTGATGACCAAATTTATAATGTAATCGTCACTGCTCATGCCTTCGTAATGATCTTCTTTATAGTTATACCTATTATAATCGGTGGCTTTGGTAACTGATTAGTTCCACTGATAATTGGAGCCCCAGACATAGCTTTTCCCCGAATAAATAACATAAGCTTCTGACTTTTACCCCCATCCTTCCTACTTCTTTTAGCCTCCTCAACAGTAGAAGCCGGAGTAGGAACAGGATGAACAGTTTATCCTCCACTAGCTGGCAACCTAGCTCACGCTGGAGCCTCAGTAGACCTAGCTATCTTCTCTCTTCACCTAGCCGGTGTATCCTCTATCCTGGGAGCTATCAACTTCATTACAACCGCAATCAACATAAAACCACCTACCCTATCACAATACCAAACCCCATTATTTGTTTGATCTGTCCTTATCACTGCCGTCTTACTTCTACTTTCACTTCCCGTCCTAGCTGCCGGCATCACAATACTACTAACAGATCGTAACTTAAATACTACATTCTTCGACCCTGCAGGAGGTGGAGATCCAGTTTTATACCAACAC
>gi|197256081|gb|FJ027917.1|_Upucerthia_certhioides_voucher_MACN-Or-ct_003_cytochrome_oxidase_subunit_1_(COI)_gene_partial_cds_mitochondrial
CTTTACCTAATTTTTGGAGCATGAGCTGGCATAATTGGAACAGCCCTCAGCCTCTTAATCCGAGCTGAACTTGGGCAACCAGGTACCCTCCTAGGTGATGACCAAATTTATAATGTAATCGTCACTGCTCATGCCTTCGTAATGATCTTCTTTATAGTTATACCTATTATAATCGGTGGCTTTGGTAACTGATTAGTTCCACTGATAATTGGAGCCCCAGACATAGCTTTTCCCCGAATAAATAACATAAGCTTCTGACTTTTACCCCCATCCTTCCTACTTCTTTTAGCCTCCTCAACAGTAGAAGCCGGAGTAGGAACAGGATGAACAGTTTATCCTCCACTAGCTGGCAACCTAGCTCACGCTGGAGCCTCAGTAGACCTAGCTATCTTCTCTCTTCACCTAGCCGGTGTATCCTCTATCCTGGGAGCTATCAACTTCATTACAACCGCAATCAACATAAAACCACCTACCCTATCACAATACCAAACCCCATTATTTGTTTGATCTGTCCTTATCACTGCCGTCTTACTTCTACTTTCACTTCCCGTCCTAGCTGCCGGCATCACAATACTACTAACAGATCGTAACTTAAATACTACATTCTTCGACCCTGCAGGAGGTGGAGATCCAGTTTTATACCAACAC
>gi|197256077|gb|FJ027915.1|_Nyctidromus_albicollis_voucher_MACN-Or-ct_1661_cytochrome_oxidase_subunit_1_(COI)_gene_partial_cds_mitochondrial
CTCTACCTAATTTTTGGCGCATGAGCCGGCATAGTAGGAACCGCCCTAAGCCTACTCATTCGTGCTGAACTAGGCCAACCAGGAACCCTTCTAGGAGACGACCAAATTTACAACGTAATCGTCACTGCACACGCCTTTGTAATAATCTTCTTCATAGTTATGCCAATTATAATCGGAGGATTCGGCAACTGACTAGTCCCACTAATAATTGGAGCCCCCGACATGGCATTCCCTCGCATAAACAACATAAGCTTCTGACTATTACCCCCATCCTTCCTTCTTTTACTAGCCTCCTCTACAGTAGAAGCAGGAGCCGGCACAGGGTGAACCGTATATCCACCACTAGCTGGCAACCTAGCCCACGCTGGAGCCTCAGTAGACCTAGCTATCTTCTCCCTGCACTTAGCAGGAGTGTCATCCATCTTAGGCGCAATTAACTTCATCACAACTGCCATCAACATAAAACCGCCCGCCCTCTCACAATACCAAACTCCCCTATTCGTATGATCAGTCCTAATCACCGCCGTACTATTACTCCTTTCACTCCCAGTTCTAGCTGCAGGCATTACTATACTACTAACAGACCGCAACCTAAATACCACATTCTTTGACCCTGCTGGAGGAGGAGACCCAGTGCTATACCAACAC
>gi|197256073|gb|FJ027913.1|_Nyctibius_griseus_voucher_MACN-Or-ct_1837_cytochrome_oxidase_subunit_1_(COI)_gene_partial_cds_mitochondrial
CTGTACCTAATCTTCGGTGCATGAGCCGGTATAGTTGGAACAGCCCTTAGCCTACTCATCCGTGCAGAACTTGGTCAACCAGGAACCCTCCTAGGAGACGACCAAATCTACAACGTAGTCGTCACTGCCCATGCCTTCGTAATAATCTTTTTCATAGTAATACCAATCATAATTGGAGGCTTTGGAAACTGACTAGTCCCCCTTATAATCGGAGCCCCCGACATAGCATTCCCCCGTATAAACAACATAAGCTTCTGACTTCTACCACCATCCTTTCTTCTCCTACTAGCCTCTTCCACAGTAGAGGCCGGGGCCGGTACCGGATGAACCGTTTACCCTCCACTAGCAGGAAACCTAGCCCATGCAGGAGCTTCAGTAGATCTTGCTATCTTTTCCCTCCACCTAGCAGGTGTATCATCCATCTTAGGTGCTATCAACTTCATCACAACTGCCATTAACATAAAACCACCTACCCTATCGCAGTACCAAACTCCACTATTCGTATGATCCGTACTTATTACCGCAGTCCTACTCCTCCTATCACTACCCGTCCTTGCCGCTGGCATCACCATGCTCTTAACGGACCGTAACCTAAACACTACATTCTTCGACCCGGCTGGGGGAGGAGATCCAGTCCTATACCAACAT
>gi|197256069|gb|FJ027911.1|_Nothura_maculosa_voucher_MACN-Or-ct_1606_cytochrome_oxidase_subunit_1_(COI)_gene_partial_cds_mitochondrial
CTATACTTAATCTTTGGCGCATGAGCCGGAATAGTAGGAACTGCCCTTAGCCTCCTTATCCGCGCTGAACTAGGCCAACCGGGAACTTTACTTGGCGATGACCAAATTTACAACGTCATTGTAACCGCCCATGCCTTCGTCATAATCTTCTTCATAGTTATGCCTATTATAATCGGAGGATTCGGTAACTGATTAGTTCCCCTTATAATTGGAGCCCCCGACATAGCCTTCCCCCGAATAAATAACATAAGTTTTTGACTCCTCCCTCCATCCTTTCTTCTACTACTAGCATCCTCTACTATTGAAGCAGGAGTAGGAACAGGGTGAACTGTTTATCCCCCATTAGCAGGAAATCTCGCCCATGCAGGTGCCTCCGTAGATCTAGCAATCTTTTCCCTCCATCTTGCAGGTGTCTCATCTATCCTAGGAGCTATTAATTTTATTACCACAGCAATTAACATAAAACCTCCTGCCCTAACGCAATACCAAACCCCACTATTCGTTTGATCTGTACTAATCACTGCCATCCTTTTACTCTTATCCTTACCAGTCCTTGCTGCAGGTATTACAATGCTACTAACTGACCGAAACCTTAACACAACATTCTTTGACCCTGCTGGAGGAGGAGACCCAGTCCTCTATCAACAC
>gi|197256065|gb|FJ027909.1|_Nothura_maculosa_voucher_MACN-Or-ct_1510_cytochrome_oxidase_subunit_1_(COI)_gene_partial_cds_mitochondrial
CTATACTTAATCTTTGGCGCATGAGCCGGAATAGTAGGAACTGCCCTTAGCCTCCTTATCCGCGCTGAACTAGGCCAACCGGGAACTTTACTTGGCGATGACCAAATTTACAACGTCATTGTAACCGCCCATGCCTTCGTCATAATCTTCTTCATAGTTATGCCTATTATAATCGGAGGATTCGGTAACTGATTAGTTCCCCTTATAATTGGAGCCCCCGACATAGCCTTCCCCCGAATAAATAACATAAGTTTTTGACTCCTCCCTCCATCCTTTCTTCTACTACTAGCATCCTCTACTATTGAAGCAGGAGTAGGAACAGGGTGAACTGTTTATCCCCCATTAGCAGGAAATCTCGCCCATGCAGGTGCCTCCGTAGATCTAGCAATCTTTTCCCTCCATCTTGCAGGTGTCTCATCTATCCTAGGAGCTATTAATTTTATTACCACAGCAATTAACATAAAACCTCCTGCCCTAACGCAATACCAAACCCCACTATTCGTTTGATCTGTACTAATCACTGCCATCCTTTTACTCTTATCCTTACCAGTCCTTGCTGCAGGTATTACAATGCTACTAACTGACCGAAACCTTAACACAACATTCTTTGACCCTGCTGGAGGAGGAGACCCAGTCCTCTATCAACAC
>gi|197256061|gb|FJ027907.1|_Nothoprocta_cinerascens_voucher_MACN-Or-cp_79_cytochrome_oxidase_subunit_1_(COI)_gene_partial_cds_mitochondrial
--ATACTTAATCTTTGGTGCATGAGCAGGCATGGTCGGAACCGCCCTTAGCCTCCTTATTCGCGCTGAACTAGGACAACCCGGGACTCTACTAGGTGACGATCAAATCTATAATGTTATCGTAACCGCCCATGCTTTCGTCATAATCTTCTTCATAGTTATACCCGTAATAATCGGAGGATTCGGAAATTGACTAGTCCCCCTTATAATTGGAGCTCCCGACATAGCATTTCCCCGAATAAATAACATAAGCTTTTGACTTCTCCCACCATCCTTTCTTCTCCTTCTTGCATCTTCTACCGTAGAAGCAGGAGCAGGCACTGGATGAACCGTATACCCTCCACTAGCCGGAAATCTTGCTCATGCAGGCGCTTCTGTAGACCTAGCAATTTTCTCTCTTCACCTTGCAGGTGTCTCCTCTATCCTTGGAGCAATTAATTTTATTACCACAGCAATTAACATAAAACCACCTGCCCTATCACAATATCAAACCCCATTATTTGTATGATCAGTACTAATTACTGCCATTTTACTCCTTCTTTCCCTCCCCGTCCTAGCTGCAGGAATTACTATACTCCTTACTGATCGAAACCTCAACACAACATTTTTTGATCCTGCTGGTGGAGGAGATCCTATTCTCTATCAACAT
>gi|197256057|gb|FJ027905.1|_Nomonyx_dominica_voucher_MACN-Or-ct_3054_cytochrome_oxidase_subunit_1_(COI)_gene_partial_cds_mitochondrial
CTGTACNTTATCTTCGGGGCGTGAGCAGGAATGATCGGCACCGCACTCAGCCTGCTAATCCGCGCAGAGCTAGGTCAACCAGGAACCCTCCTNGGAGATGACCAAATCTACAATGTAATCGTCACCGCCCACGCCTTCGTAATAATCTTCTTCATGGTAATACCAATTATAATCGGAGGATTTGGCAACTGACTGGTCCCTCTCATAATCGGCGCCCCTGACATAGCATTTCCCCGAATAAATAATATAAGCTTCTGACTCCTCCCACCCTCCTTCCTCCTGCTACTAGCCTCATCCACTGTAGAAGCTGGCGCCGGCACAGGATGAACCGTCTACCCTCCTCTGGCTAGCAACCTAGCTCACGCCGGAGCCTCAGTAGACCTGGCCATCTTCTCACTTCACCTAGCCGGTGTCTCATCTATCCTCGGGGCCATCAACTTTATCACCACGGCCATCAACATAAAACCCCCAGCACTTTCACAATATCAAACACCCCTGTTCNTCTGATCCGTCCTAATCACTGCCATCCTACTCCTCTTATCGCTCCCCGTGCTGGCTGCCGGCATCACAATACTACTTACTGACCGAAACCTAAACACCACATTCTTCGACCCCGCAGGAGGGGGAGACCCCATCCTCTACCAACAC
>gi|197256053|gb|FJ027903.1|_Netta_peposaca_voucher_MACN-Or-ct_2233_cytochrome_oxidase_subunit_1_(COI)_gene_partial_cds_mitochondrial
TTATATCTTATCTTCGGGGCATGAGCCGGAATAATCGGCACAGCACTCAGCCTGCTAATCCGCGCAGAACTAGGCCAACCGGGAACCCTCCTGGGTGATGACCAGATTTACAACGTAATCGTCACCGCCCACGCCTTTGTAATAATCTTCTTCATAGTGATGCCCATCATAATCGGAGGGTTTGGCAACTGATTGGTCCCCCTAATAATCGGCGCCCCCGACATAGCATTCCCACGAATAAACAACATAAGCTTCTGACTCCTCCCGCCTTCATTCCTCCTACTACTCGCCTCATCCACCGTAGAAGCTGGCGCCGGCACAGGCTGAACCGTGTATCCACCCCTAGCAGGCAACCTAGCTCACGCTGGAGCCTCGGTAGACCTGGCCATCTTCTCGCTCCACTTAGCCGGTGTCTCCTCCATCCTCGGAGCCATTAACTTTATCACCACAGCCATCAACATAAAACCTCCCGCACTCTCACAATACCAAACCCCACTCTTCGTCTGATCCGTCCTAATCACCGCTATTCTGCTCCTCCTATCGTTACCCGTTCTCGCCGCTGGCATTACAATACTATTAACCGACCGAAACCTAAACACCACATTCTTTGACCCCGCCGGAGGAGGTGACCCAATCCTATACCAACAC
>gi|197256049|gb|FJ027901.1|_Netta_peposaca_voucher_MACN-Or-ct_2203_cytochrome_oxidase_subunit_1_(COI)_gene_partial_cds_mitochondrial
TTATATNTTATCTTCGGGGCATGAGCCGGAATAATCGGCACAGCACTCAGCCTGCTAATCCGCGCAGAACTAGGCCAACCGGGAACCCTCCTGGGTGATGACCAGATTTACAACGTAATCGTCACCGCCCATGCCTTTGTAATAATCTTCTTCATAGTGATGCCCATCATAATCGGAGGGTTTGGCAACTGATTGGTCCCCCTAATAATCGGCGCCCCCGACATAGCATTCCCACGAATAAACAACATAAGCTTCTGACTCCTCCCGCCTTCATTCCTCCTACTACTCGCCTCATCCACCGTAGAAGCTGGCGCCGGCACAGGCTGAACCGTGTATCCACCCCTAGCAGGCAACCTAGCTCACGCTGGAGCCTCGGTAGACCTGGCCATCTTCTCGCTCCACTTAGCCGGTGTCTCCTCCATCCTCGGAGCCATTAACTTTATCACCACAGCCATCAACATAAAACCTCCCGCACTCTCACAATACCAAACCCCACTCTTCGTCTGATCCGTCCTAATCACCGCTATTCTGCTCCTCCTATCGTTACCCGTTCTCGCCGCTGGCATTACAATACTATTAACCGACCGAAACCTAAACACCACATTCTTTGACCCCGCCGGAGGAGGTGACCCAATCCTATACCAACAC
>gi|197256045|gb|FJ027899.1|_Netta_peposaca_voucher_MACN-Or-ct_252_cytochrome_oxidase_subunit_1_(COI)_gene_partial_cds_mitochondrial
TTATATCTTATCTTCGGGGCATGAGCCGGAATAATCGGCACAGCACTCAGCCTGCTAATCCGCGCAGAACTAGGCCAACCGGGAACCCTCCTGGGTGATGACCAGATTTACAACGTAATCGTCACCGCCCATGCCTTTGTAATAATCTTCTTCATAGTGATGCCCATCATAATCGGAGGGTTTGGCAACTGATTGGTCCCCCTAATAATCGGCGCCCCCGACATAGCATTCCCACGAATAAACAACATAAGCTTCTGACTCCTCCCGCCTTCATTCCTCCTACTACTCGCCTCATCCACCGTAGAAGCTGGCGCCGGCACAGGCTGAACCGTGTATCCACCCCTAGCAGGCAACCTAGCTCACGCTGGAGCCTCGGTAGACCTGGCCATCTTCTCGCTCCACTTAGCCGGTGTCTCCTCCATCCTCGGAGCCATTAACTTTATCACCACAGCCATCAACATAAAACCTCCCGCACTCTCACAATACCAAACCCCACTCTTCGTCTGATCCGTCCTAATCACCGCTATTCTGCTCCTCCTATCGTTACCCGTTCTCGCCGCTGGCATTACAATACTATTAACCGACCGAAACCTAAACACCACATTCTTTGACCCCGCCGGAGGAGGTGACCCAATCCTATACCAACAC
>gi|197256041|gb|FJ027897.1|_Myiozetetes_similis_voucher_MACN-Or-ct_2921_cytochrome_oxidase_subunit_1_(COI)_gene_partial_cds_mitochondrial
-----------------------------------------CGCCTTAAGTCTCCTTATCCGAGCAGAATTAGGGCAACCAGGAACTCTTCTAGGAGATGATCAAATCTACAATGTAATTGTTACCGCCCATGCTTTCGTAATAATTTTCTTTATAGTAATGCCCATTATAATTGGTGGATTTGGCAACTGACTAGTCCCCTTAATAATCGGTGCCCCCGACATAGCATTCCCACGTATAAACAATATAAGTTTCTGACTACTTCCCCCATCATTCCTTCTCCTCTTAGCCTCATCTACTATTGAAGCTGGAGTGGGGACTGGATGAACTGTATACCCACCATTAGCTGGTAACCTAGCACATGCTGGAGCTTCAGTTGACCTAGCCATCTTCTCACTTCACCTTGCAGGCATTTCCTCAATCCTAGGCGCCATCAACTTCATTACCACTGCAATTAACATAAAACCGCCAGCCCTATCACAATATCAAACCCCCTTATTCGTATGATCCGTCTTAATCACCGCAGTCCTTCTCCTCCTCTCCCTACCAGTTCTTGCTGCCGGTATCACCATGCTTTTAACAGACCGCAACCTCAATACTACATTCTTCGACCCTGCAGGAGGTGGAGACCCAGTTCTATACC-----
>gi|197256037|gb|FJ027895.1|_Myiopsitta_monachus_voucher_MACN-Or-ct_2211_cytochrome_oxidase_subunit_1_(COI)_gene_partial_cds_mitochondrial
CTTTACTTAATCTTCGGCGCATGAGCAGGCATAATCGGTACCGCCCTGAGCCTTCTTATCCGTGCAGAACTTGGCCAACCAGGAACTCTATTAGGAGATGACCAAATCTACAATGTAATCGTTACAGCACATGCCTTCGTAATAATCTTCTTCATAGTAATACCAATCATAATCGGAGGGTTTGGAAACTGATTAGTTCCCCTTATAATTGGTGCCCCTGACATAGCATTTCCACGCATAAACAACATAAGCTTCTGACTACTCCCCCCATCCTTCCTCCTTCTACTAGCCTCCTCCACAGTAGAAGCAGGAGCAGGCACAGGATGAACAGTCTATCCCCCCCTAGCCGGAAACCTAGCCCATGCCGGAGCTTCAGTGGACTTAGCCATCTTCTCCCTCCACCTGGCAGGTGTCTCTTCTATTCTAGGAGCAATTAACTTTATCACTACAGCTATTAACATAAAACCCCCAACCCTATCACAATATCAAACCCCACTATTCGTTTGATCCGTCTTAATCACAGCCGTACTGCTCCTACTGGCATTACCAGTTCTAGCCGCCGGAATTACAATACTCCTTACAGATCGCAACCTAAACACCACATTCTTCGACCCCGCTGGGGGAGGAGACCCAATCCTGTACCAACAC
>gi|197256033|gb|FJ027893.1|_Myiopsitta_monachus_voucher_MACN-Or-ct_2221_cytochrome_oxidase_subunit_1_(COI)_gene_partial_cds_mitochondrial
CNNTANTTAATCTTCGGCGCATGAGCAGGCATAATCGGTACCGCCCTGAGCCTTCTTATCCGTGCAGAACTTGGCCAACCAGGAACTCTATTAGGAGATGACCAAATCTACAATGTAATCGTTACAGCACATGCCTTCGTAATAATCTTCTTCATAGTAATACCAATCATAATCGGAGGGTTTGGAAACTGATTAGTTCCCCTTATAATTGGTGCCCCTGACATAGCATTTCCACGCATAAACAACATAAGCTTCTGACTACTCCCCCCATCCTTCCTCCTTCTACTAGCCTCCTCCACAGTAGAAGCAGGAGCAGGCACAGGATGAACAGTCTATCCCCCCCTAGCCGGAAACCTAGCCCATGCCGGAGCTTCAGTGGACTTAGCCATCTTCTCCCTCCACCTGGCAGGTGTCTCTTCTATTCTAGGAGCAATTAACTTTATCACTACAGCTATTAACATAAAACCCCCAACCCTATCACAATATCAAACCCCACTATTCGTTTGATCCGTCTTAATCACAGCCGTACTGCTCCTACTGGCATTACCAGTTCTAGCCGCCGGAATTACAATACTCCTTACAGATCGCAACCTAAACACCACATTCTTCGACCCCGCTGGGGGAGGAGACCCAATCCTGTACCAACAC
>gi|197256029|gb|FJ027891.1|_Myiopsitta_monachus_voucher_MACN-Or-ct_2220_cytochrome_oxidase_subunit_1_(COI)_gene_partial_cds_mitochondrial
------TTAATCTTCGGCGCATGAGCAGGCATAATCGGTACCGCCCTGAGCCTTCTTATCCGTGCAGAACTTGGCCAACCAGGAACTCTATTAGGAGATGACCAAATCTACAATGTAATCGTTACAGCACATGCCTTCGTAATAATCTTCTTCATAGTAATACCAATCATAATCGGAGGGTTTGGAAACTGATTAGTTCCCCTTATAATTGGTGCCCCTGACATAGCATTTCCACGCATAAACAACATAAGCTTCTGACTACTCCCCCCATCCTTCCTCCTTCTACTAGCCTCCTCCACAGTAGAAGCAGGAGCAGGCACAGGATGAACAGTCTATCCCCCCCTAGCCGGAAACCTAGCCCATGCCGGAGCTTCAGTGGACTTAGCCATCTTCTCCCTCCACCTGGCAGGTGTCTCTTCTATTCTAGGAGCAATTAACTTTATCACTACAGCTATTAACATAAAACCCCCAACCCTATCACAATATCAAACCCCACTATTCGTTTGATCCGTCTTAATCACAGCCGTACTGCTCCTACTGGCATTACCAGTTCTAGCCGCCGGAATCACAATACTCCTTACAGATCGCAACCTAAACACCACATTCTTCGACCCCGCTGGGGGAGGAGACCCAATCCTGTACCAACAC
>gi|197256025|gb|FJ027889.1|_Myiopsitta_monachus_voucher_MACN-Or-ct_1717_cytochrome_oxidase_subunit_1_(COI)_gene_partial_cds_mitochondrial
CTTTACTTAATCTTCGGCGCATGAGCAGGCATAATCGGTACCGCCCTGAGCCTTCTTATCCGTGCAGAACTTGGCCAACCAGGAACTCTATTAGGAGATGACCAAATCTACAATGTAATCGTTACAGCACATGCCTTCGTAATAATCTTCTTCATAGTAATACCAATCATAATCGGAGGGTTTGGAAACTGATTAGTTCCCCTTATAATTGGTGCCCCTGACATAGCATTTCCACGCATAAACAACATAAGCTTCTGACTACTCCCCCCATCCTTCCTCCTTCTACTAGCCTCCTCCACAGTAGAAGCAGGAGCAGGCACAGGATGAACAGTCTATCCCCCCCTAGCCGGAAACCTAGCCCATGCCGGAGCTTCAGTGGACTTAGCCATCTTCTCCCTCCACCTGGCAGGTGTCTCTTCTATTCTAGGAGCAATTAACTTTATCACTACAGCTATTAACATAAAACCCCCAACCCTATCACAATATCAAACCCCACTATTCGTTTGATCCGTCTTAATCACAGCCGTACTGCTCCTACTGGCATTACCAGTTCTAGCCGCCGGAATTACAATACTCCTTACAGATCGCAACCTAAACACCACATTCTTCGACCCCGCTGGGGGAGGAGACCCAATCCTGTACCAACAC
>gi|197256021|gb|FJ027887.1|_Myiophobus_fasciatus_voucher_MACN-Or-ct_1379_cytochrome_oxidase_subunit_1_(COI)_gene_partial_cds_mitochondrial
CTATATCTAATCTTTGGTGCCTGGGCCGGCATGATTGGCACCGCCCTAAGCCTTCTTATTCGAGCAGAACTGGGACAACCAGGAACCCTCCTAGGAGATGACCAGATCTATAATGTAATCGTCACCGCTCACGCCTTTGTAATAATCTTCTTTATAGTTATACCTATCATAATCGGAGGATTTGGTAACTGACTAGTCCCCCTAATAATTGGTGCTCCTGACATAGCATTCCCTCGTATAAACAACATAAGCTTCTGATTACTGCCCCCTTCATTTCTTCTCCTCCTAGCTTCGTCCACAGTTGAAGCCGGAGCCGGAACCGGATGAACCGTCTATCCACCATTGGCCGGCAATCTAGCACATGCTGGAGCTTCAGTAGACCTAGCCATTTTCTCCCTTCATCTTGCAGGTGTTTCATCAATCTTAGGAGCTATCAACTTCATTACCACTGCAATCAACATAAAACCACCAGCTTTATCCCAATATCAAACTCCCCTATTTGTATGATCTGTCCTAATTACTGCAGTTCTTCTTCTCCTTTCCCTTCCAGTCCTCGCTGCAGGCATTACTATACTACTAACAGATCGTAACCTTAACACTACATTCTTTGACCCCGCAGGAGGCGGAGATCCAGTCTTATACCAACAT
>gi|197256017|gb|FJ027885.1|_Myiophobus_fasciatus_voucher_MACN-Or-ct_835_cytochrome_oxidase_subunit_1_(COI)_gene_partial_cds_mitochondrial
CTATATCTAATCTTTGGTGCCTGGGCCGGCATGATTGGCACCGCCCTAAGCCTTCTTATTCGAGCAGAACTAGGACAGCCAGGAACCCTCCTAGGAGATGACCAGATCTACAATGTAATCGTCACCGCTCACGCCTTTGTAATAATCTTCTTTATAGTTATACCTATCATAATCGGGGGATTTGGTAACTGGCTAGTCCCCCTAATAATCGGTGCTCCTGATATAGCATTCCCCCGTATAAACAACATAAGTTTCTGATTACTACCCCCTTCATTTCTTCTCCTCCTAGCTTCGTCCACAGTTGAAGCCGGAGCCGGAACCGGATGGACCGTCTATCCACCATTAGCCGGTAATCTAGCACATGCTGGAGCTTCAGTAGACCTAGCCATTTTCTCCCTCCATCTTGCAGGTGTTTCATCAATTTTAGGAGCTATCAACTTCATTACCACTGCAATTAACATAAAACCACCAGCTCTATCCCAATATCAAACTCCCCTATTCGTATGATCTGTTCTAATTACTGCAGTTCTTCTTCTCCTTTCTCTTCCAGTCCTCGCTGCAGGCATTACCATACTACTGACAGATCGTAACCTTAACACCACATTCTTTGACCCCGCAGGAGGTGGAGACCCAGTCTTATACCAACAT
>gi|197256013|gb|FJ027883.1|_Myiodynastes_maculatus_voucher_MACN-Or-ct_1803_cytochrome_oxidase_subunit_1_(COI)_gene_partial_cds_mitochondrial
TTATATTTAATTTTTGGCGCCTGGGCCGGTATAATTGGTACCGCTNTAAGCCTTCTTATCCGAGCAGAACTAGGACAACCAGGAACTCTCCTAGGAGACGACCAAATCTATAATGTAATCGTCACTGCTCATGCTTTTGTAATAATTTTCTTTATAGTAATACCCATCATAATCGGAGGATTTGGAAACTGACTAGTTCCCCTAATAATTGGCGCCCCAGACATAGCATTCCCACGTATAAACAATATAAGCTTTTGACTACTCCCACCATCCTTCCTTCTCCTCCTAGCTTCCTCTACAGTCGAAGCAGGAGTAGGAACCGGATGAACTGTCTACCCACCATTAGCTGGCAACTTAGCACACGCTGGAGCTTCAGTAGACCTAGCCATCTTCTCCCTTCACCTCGCAGGCGTTTCTTCAATCCTAGGTGCTATTAATTTTATTACCACTGCAATTAACATAAAACCCCCAGCCTTAACACAATACCAAACCCCCTTGTTCGTCTGATCAGTCTTAATCACCGCAGTCCTTCTTCTCCTCTCCCTCCCAGTCCTCGCTGCCGGCATCACTATACTATTAACAGACCGCAACCTTAACACTACATTCTTTGACCCTGCAGGAGGCGGAGACCCAGTCCTTTATCAACAC
>gi|197256009|gb|FJ027881.1|_Myiodynastes_maculatus_voucher_MACN-Or-ct_977_cytochrome_oxidase_subunit_1_(COI)_gene_partial_cds_mitochondrial
TTATATTTAATTTTTGGCGCCTGGGCCGGTATAATTGGTACCGCTCTAAGCCTTCTTATCCGAGCAGAACTAGGACAACCAGGAACTCTCCTAGGAGACGACCAAATCTATAATGTAATCGTCACTGCTCATGCTTTTGTAATAATTTTCTTTATAGTAATACCCATCATAATCGGAGGATTTGGAAACTGACTAGTTCCCCTAATAATTGGCGCCCCAGACATAGCATTCCCACGTATAAACAATATAAGCTTTTGACTACTCCCACCATCCTTCCTTCTCCTCCTAGCTTCCTCTACAGTCGAAGCAGGAGTAGGAACCGGATGAACTGTCTACCCACCATTAGCTGGCAACTTAGCACACGCTGGAGCTTCAGTAGACCTAGCCATCTTCTCCCTTCACCTCGCAGGCGTTTCTTCAATCCTAGGTGCTATTAATTTTATTACCACTGCAATTAACATAAAACCCCCAGCCTTAACACAATACCAAACCCCCTTGTTCGTCTGATCAGTCTTAATCACCGCAGTCCTTCTTCTCCTCTCCCTCCCAGTCCTCGCTGCCGGCATCACTATACTATTAACAGACCGCAACCTTAACACTACATTCTTTGACCCTGCAGGAGGCGGAGACCCAGTCCTTTATCAACAC
>gi|197256005|gb|FJ027879.1|_Myiodynastes_maculatus_voucher_MACN-Or-ct_1119_cytochrome_oxidase_subunit_1_(COI)_gene_partial_cds_mitochondrial
TTATATTTAATTTTTGGCGCCTGGGCCGGTATAATTGGTACCGCTCTAAGCCTTCTTATCCGAGCAGAACTAGGACAACCAGGAACTCTCCTAGGAGACGACCAAATCTATAATGTAATCGTCACTGCTCATGCTTTTGTAATAATTTTCTTTATAGTAATACCCATCATAATCGGAGGATTTGGAAACTGACTAGTTCCCCTAATAATTGGCGCCCCAGACATAGCATTCCCACGTATAAACAATATAAGCTTTTGACTACTCCCACCATCCTTCCTTCTCCTCCTAGCTTCCTCTACAGTCGAAGCAGGAGTAGGAACCGGATGAACTGTCTACCCACCATTAGCTGGCAACTTAGCACACGCTGGAGCTTCAGTAGACCTAGCCATCTTCTCCCTTCACCTCGCAGGCGTTTCTTCAATCCTAGGTGCTATTAATTTTATTACCACTGCAATTAACATAAAACCCCCAGCCTTAACACAATACCAAACCCCCTTGTTCGTCTGATCAGTCTTAATCACCGCAGTCCTTCTTCTCCTCTCCCTCCCAGTCCTCGCTGCCGGCATCACTATACTATTAACAGACCGCAACCTTAACACTACATTCTTTGACCCTGCAGGAGGCGGAGACCCAGTCCTTTATCAACAC
>gi|197256001|gb|FJ027877.1|_Myioborus_brunniceps_voucher_MACN-Or-ct_706_cytochrome_oxidase_subunit_1_(COI)_gene_partial_cds_mitochondrial
CTATACCTAATTTTCGGCGCATGAGCCGGAATAGTGGGTACCGCCCTAAGCCTCCTTATCCGAGCAGAATTAGGCCAACCCGGAGCCCTTCTGGGAGACGACCAAGTTTACAACGTAGTTGTCACGGCCCATGCCTTCGTAATAATTTTCTTTATAGTTATGCCAATTATAATCGGAGGGTTCGGAAACTGACTGGTCCCTCTAATAATCGGAGCCCCAGACATAGCATTCCCACGTATAAACAACATAAGCTTCTGACTACTCCCACCATCATTCCTTCTACTACTAGCATCCTCCACAGTTGAAGCAGGTGTTGGCACCGGCTGAACAGTGTACCCCCCACTAGCCGGTAACCTAGCCCACGCCGGAGCCTCAGTTGACCTCGCAATCTTCTCTCTACACCTGGCCGGTATTTCATCAATCCTAGGGGCAATCAACTTCATCACTACAGCAATCAACATGAAACCACCCGCCCTCTCACAATACCAAACCCCCCTATTCGTTTGATCCGTCCTAATCACTGCAGTTCTACTACTCCTCTCCCTTCCAGTCCTAGCTGCGGGAATCACAATGCTCCTTACAGACCGCAACCTAAACACTACATTCTTCGACCCTGCCGGAGGAGGAGATCCAGTCCTATATCAACAC
>gi|197255997|gb|FJ027875.1|_Myiarchus_tyrannulus_voucher_MACN-Or-ct_3275_cytochrome_oxidase_subunit_1_(COI)_gene_partial_cds_mitochondrial
CTATATNTAATTTTTGGCGCCTGAGCCGGCATAATTGGTACCGCCCTAAGCCTCNTTATCCGAGCAGAACTAGGACAACCAGGAACCCTCCTAGGAGACGACCAAATCTATAATGTAATTGTCACTGCCCATGCTTTCGTAATGATCTTCTTTATAGTAATACCCATTATAATTGGTGGATTTGGTAACTGATTAGTTCCCCTAATAATTGGTGCCCCCGACATAGCATTCCCACGTATAAACAATATAAGCTTCTGACTACTCCCCCCATCGTTCCTCCTACTCCTAGCCTCATCTACAATTGAAGCCGGAGTGGGCACTGGATGAACTGTCTACCCTCCACTAGCCGGTAACCTAGCCCATGCTGGAGCTTCAGTAGACCTAGCCATCTTCTCCCTTCACCTTGCAGGTATTTCTTCAATCCTAGGTGCTATTAACTTCATCACTACTGCAATTAATATAAAACCACCAACCCTATCACAATACCAAACCCCCCTATTTGTATGATCTGTCCTAATTACCGCAGTTCTTCTTCTCCTTTCCCTTCCAGTCCTTGCTGCTGGCATCACCATGCTATTAACTGACCGCAATCTCAACACTACATTCTTCGACCCAGCAGGAGGCGGAGATCCAGTTTTATACCAACAT
>gi|197255993|gb|FJ027873.1|_Myiarchus_tyrannulus_voucher_MACN-Or-ct_1657_cytochrome_oxidase_subunit_1_(COI)_gene_partial_cds_mitochondrial
CTATATTTAATTTTTGGCGCCTGAGCCGGCATAATTGGTACCGCCCTAAGCCTCCTTATCCGAGCAGAACTAGGACAACCAGGAACCCTCCTAGGAGACGACCAAATCTATAATGTAATTGTCACTGCCCATGCTTTCGTAATGATCTTCTTTATAGTAATACCCATTATAATTGGTGGATTTGGTAACTGATTAGTTCCCCTAATAATTGGTGCCCCCGACATAGCATTCCCACGTATAAACAATATAAGCTTCTGACTACTCCCCCCATCGTTCCTCCTACTCCTAGCCTCATCTACAATTGAAGCCGGAGTGGGCACTGGATGAACTGTCTACCCTCCACTAGCCGGTAACCTAGCCCATGCTGGAGCTTCAGTAGACCTAGCCATCTTCTCCCTTCACCTTGCAGGTATTTCTTCAATCCTAGGTGCTATTAACTTCATCACTACTGCAATTAATATAAAACCACCAACCCTATCACAATACCAAACCCCCCTATTTGTATGATCTGTCCTAATTACCGCAGTTCTTCTTCTCCTTTCCCTTCCAGTCCTTGCTGCTGGCATCACCATGCTATTAACTGACCGCAATCTCAACACTACATTCTTCGACCCAGCAGGAGGCGGAGATCCAGTTTTATACCAACAT
>gi|197255989|gb|FJ027871.1|_Myiarchus_tyrannulus_voucher_MACN-Or-ct_707_cytochrome_oxidase_subunit_1_(COI)_gene_partial_cds_mitochondrial
CTATATTTAATTTTTGGCGCCTGAGCCGGCATAATTGGTACCGCCCTAAGCCTCCTTATCCGAGCAGAACTAGGACAACCAGGAACCCTCCTAGGAGACGACCAAATCTATAATGTAATTGTCACTGCCCATGCTTTCGTAATGATCTTCTTTATAGTAATACCCATTATAATTGGTGGATTTGGTAACTGATTAGTTCCCCTAATAATTGGTGCCCCCGACATAGCATTCCCACGTATAAACAATATAAGCTTCTGACTACTCCCCCCATCGTTCCTCCTACTCCTAGCCTCATCTACAATTGAAGCCGGAGTGGGCACTGGATGAACTGTCTACCCTCCACTAGCCGGTAACCTAGCCCATGCTGGAGCTTCAGTAGACCTAGCCATCTTCTCCCTTCACCTTGCAGGTATTTCTTCAATCCTAGGTGCTATTAACTTCATCACTACTGCAATTAATATAAAACCACCAACCCTATCACAATACCAAACCCCCCTATTTGTATGATCTGTCCTAATTACCGCAGTTCTTCTTCTCCTTTCCCTTCCAGTCCTTGCTGCTGGCATCACCATGCTATTAACTGACCGCAATCTCAACACTACATTCTTCGACCCAGCAGGAGGCGGAGATCCAGTTTTATACCAACAT
>gi|197255985|gb|FJ027869.1|_Myiarchus_tuberculifer_voucher_MACN-Or-ct_889_cytochrome_oxidase_subunit_1_(COI)_gene_partial_cds_mitochondrial
CTATATTTAATTTTTGGCGCCTGAGCCGGCATGATTGGTACAGCCCTAAGCCTTCTTATCCGAGCAGAACTAGGGCAACCAGGGACTCTCCTAGGAGACGACCAAATCTATAATGTAATTGTCACTGCCCATGCCTTCGTAATAATCTTCTTTATAGTAATGCCCATTATAATTGGTGGATTTGGCAACTGATTAGTCCCCCTAATAATTGGTGCCCCTGACATAGCATTTCCACGTATAAATAATATAAGCTTCTGACTACTCCCTCCATCATTCCTCCTGCTCCTAGCCTCGTCTACAATCGAAGCTGGAGTAGGCACCGGATGAACTGTTTACCCACCTTTAGCCGGTAATCTAGCCCATGCTGGAGCTTCAGTAGATCTAGCCATCTTCTCCCTCCACCTTGCAGGTGTTTCTTCAATCCTAGGTGCTATTAACTTCATCACCACTGCAATTAACATAAAACCACCAGCCCTATCACAATACCAAACCCCCCTATTTGTATGATCCGTCTTAATTACCGCAGTTCTCCTTCTCCTCTCCCTCCCAGTTCTTGCTGCTGGCATCACTATACTATTAACAGACCGCAATCTTAACACTACGTTCTTCGACCCAGCAGGAGGCGGGGATCCAGTCTTATACCAACAT
>gi|197255981|gb|FJ027867.1|_Myiarchus_swainsoni_voucher_MACN-Or-ct_2835_cytochrome_oxidase_subunit_1_(COI)_gene_partial_cds_mitochondrial
CTATATTTAATTTTTGGCGCCTGAGCCGGTATGATTGGTACAGCCCTAAGCCTCCTTATCCGAGCAGAACTAGGACAACCAGGGACTCTCCTAGGAGATGACCAAATCTATAATGTAATTGTCACTGCCCATGCCTTCGTAATAATCTTCTTTATAGTAATGCCCATTATAATTGGTGGATTTGGCAACTGATTGGTTCCCCTAATAATTGGTGCTCCTGACATAGCATTCCCACGTATAAATAACATAAGCTTCTGACTACTCCCCCCATCATTCCTCCTGCTCCTAGCCTCATCTACAATTGAAGCTGGAGTAGGCACCGGATGAACTGTTTACCCACCATTAGCCGGTAATCTAGCCCATGCTGGAGCTTCAGTAGACCTAGCCATCTTCTCCCTCCACCTTGCAGGTGTTTCTTCAATCCTAGGTGCTATTAACTTCATCACCACTGCAATTAATATAAAACCACCAGCCCTATCACAATACCAAACCCCCCTATTTGTATGATCCGTCTTAATTACCGCAGTTCTCCTCCTCCTCTCTCTCCCAGTTCTTGCTGCCGGCATCACCATACTATTAACAGACCGCAATCTTAACACTACGTTCTTTGATCCAGCAGGAGGCGGAGATCCAGTCTTATATCAGCAT
>gi|197255977|gb|FJ027865.1|_Mycteria_americana_voucher_MACN-Or-ct_1856_cytochrome_oxidase_subunit_1_(COI)_gene_partial_cds_mitochondrial
CTATACCTAATCTTCGGAGCATGGGCCGGCATAGTCGGAACCGCTCTCAGCCTCCTCATCCGTGCAGAACTCGGCCAGCCAGGAACCCTCTTAGGAGACGACCAAATCTACAACGTAATCGTCACCGCTCATGCCTTCGTAATAATCTTCTTCATAGTTATACCAATTATAATCGGAGGATTCGGAAACTGACTTGTCCCACTTATAATCGGCGCCCCAGATATAGCATTCCCACGCATAAACAACATAAGCTTCTGACTACTTCCACCATCCTTCTTGCTCCTACTAGCCTCCTCCACAGTAGAAGCAGGAGCAGGCACAGGATGAACCGTATATCCTCCTCTAGCTGGCAACTTAGCCCATGCCGGAGCTTCAGTAGACCTAGCCATCTTCTCTCTCCACCTGGCAGGTGTCTCCTCAATCCTAGGAGCAATCAACTTTATCACAACTGCCATCAACATAAAACCTCCTGCCCTATCACAGTACCAAACTCCCCTATTCGTATGATCCGTCCTAATCACTGCCGTCCTTCTACTACTCTCCTTACCAGTCCTCGCTGCAGGTATTACCATGCTACTAACAGATCGAAACCTAAATACCACATTCTTTGATCCAGCTGGAGGAGGAGACCCTGTCCTATACCAACAC
>gi|197255973|gb|FJ027863.1|_Muscisaxicola_rufivertex_voucher_MACN-Or-ct_1299_cytochrome_oxidase_subunit_1_(COI)_gene_partial_cds_mitochondrial
TTATATCTAATTTTTGGCGCCTGGGCCGGAATGATTGGTACCGCCCTAAGTCTCCTTATTCGAGCAGAACTAGGCCAACCAGGAACTCTCCTAGGAGATGATCAGATCTATAATGTAATTGTTACTGCTCACGCCTTTGTAATAATCTTCTTTATAGTGATACCCATTATAATTGGAGGGTTCGGTAACTGACTAGTTCCCCTAATAATTGGGGCCCCTGACATAGCATTTCCTCGTATAAATAATATAAGTTTCTGATTACTACCTCCATCTTTCCTTCTCCTTTTAGCCTCATCCACAGTTGAAGCCGGTGTAGGAACTGGATGAACTGTATACCCACCATTAGCCGGTAACCTAGCACATGCCGGAGCTTCAGTAGACTTAGCTATCTTCTCCCTTCATCTTGCAGGTGTTTCTTCAATCCTAGGTGCTATCAACTTCATCACTACTGCAATCAATATAAAACCACCAGCCCTATCACAATATCAAACTCCCCTATTCGTATGATCCGTCCTGATTACTGCAGTTCTCCTCCTCCTCTCTCTCCCAGTACTTGCTGCTGGTATCACTATACTACTCACAGATCGTAATCTTAACACTACATTCTTTGATCCCGCAGGAGGTGGAGATCCAGTCTTATATCAACAC
>gi|197255969|gb|FJ027861.1|_Muscisaxicola_maculirostris_voucher_MACN-Or-ct_1283_cytochrome_oxidase_subunit_1_(COI)_gene_partial_cds_mitochondrial
CTATACCTAATTTTCGGCGCCTGAGCCGGAATGATTGGTACCGCCTTAAGCCTTCTTATTCGAGCAGAACTAGGACAACCAGGAACTCTCCTAGGAGATGACCAAATCTACAATGTAATCGTCACTGCTCATGCCTTCGTAATAATCTTCTTTATAGTAATGCCTATTATAATTGGGGGATTTGGTAACTGATTAGTCCCTCTAATAATTGGTGCTCCAGACATAGCATTCCCTCGCATAAATAATATAAGCTTCTGACTTCTACCCCCATCCTTCCTTCTCCTTTTAGCCTCGTCCACAATTGAAGCTGGTGTAGGAACTGGATGAACTGTTTATCCACCATTAGCCGGCAACCTAGCACACGCTGGAGCTTCAGTAGACTTAGCTATCTTTTCCCTTCACCTTGCAGGTGTTTCCTCAATTCTAGGTGCTATCAACTTCATCACTACCGCTATTAACATAAAACCACCATCTCTATCACAATATCAAACCCCCTTATTCGTATGATCTGTACTAATCACTGCAGTTCTCCTTCTCCTATCCCTTCCAGTGCTTGCTGCTGGTATTACAATACTGCTTACAGATCGCAACCTCAACACAACATTCTTCGACCCCGCAGGAGGTGGAGATCCAGTCCTTTACCAGCAT
>gi|197255965|gb|FJ027859.1|_Muscisaxicola_maculirostris_voucher_MACN-Or-ct_592_cytochrome_oxidase_subunit_1_(COI)_gene_partial_cds_mitochondrial
CTATACCTAATTTTCGGCGCCTGAGCCGGAATGATTGGTACCGCCTTAAGCCTTCTTATTCGAGCAGAACTAGGACAACCAGGAACTCTCCTAGGAGATGACCAAATCTACAATGTAATCGTCACTGCTCATGCCTTCGTAATAATCTTCTTTATAGTAATGCCTATTATAATTGGGGGATTTGGTAACTGATTAGTCCCTCTAATAATTGGTGCTCCAGACATAGCATTCCCTCGCATAAATAATATAAGCTTCTGACTTCTACCCCCATCCTTCCTTCTCCTTTTAGCCTCGTCCACAATTGAAGCTGGTGTAGGAACTGGATGAACTGTTTATCCACCATTAGCCGGCAACCTAGCACACGCTGGAGCTTCAGTAGACTTAGCTATCTTTTCCCTTCACCTTGCAGGTGTTTCCTCAATTCTAGGTGCTATCAACTTCATCACTACCGCTATTAACATAAAACCACCATCTCTATCACAATATCAAACCCCCTTATTCGTATGATCTGTACTAATCACTGCAGTTCTCCTTCTCCTATCCCTTCCAGTGCTTGCTGCTGGTATTACAATACTGCTTACAGATCGCAACCTCAACACAACATTCTTCGACCCCGCAGGAGGTGGAGATCCAGTCCTTTACCAGCAT
>gi|197255961|gb|FJ027857.1|_Muscisaxicola_maclovianus_voucher_MACN-Or-ct_2562_cytochrome_oxidase_subunit_1_(COI)_gene_partial_cds_mitochondrial
TTATATCTAATTTTTGGCGCCTGAGCCGGAATGATTGGTACCGCCCTAAGTCTCCTTATTCGAGCAGAACTAGGCCAACCAGGAACTCTCCTAGGAGATGATCAGATCTATAATGTAATTGTTACTGCTCATGCCTTCGTGATAATCTTCTTTATAGTGATACCCATTATAATTGGAGGGTTCGGTAACTGACTAGTTCCCCTAATAATTGGAGCCCCCGACATAGCATTTCCTCGTATAAATAATATAAGTTTCTGACTACTACCTCCATCTTTCCTTCTCCTTTTAGCCTCATCCACAGTTGAAGCCGGTGTAGGAACTGGATGAACTGTATACCCACCATTAGCCGGTAACCTAGCACATGCCGGAGCTTCAGTAGACTTAGCTATCTTCTCCCTTCATCTTGCAGGTGTTTCTTCAATCCTAGGTGCTATCAACTTCATCACCACTGCAATCAATATAAAACCACCAGCCCTATCACAATATCAAACTCCCCTATTCGTATGATCCGTCCTAATTACTGCAGTTCTCCTTCTCCTCTCTCTCCCAGTACTTGCTGCTGGTATCACTATACTGCTTACAGATCGTAATCTTAACACCACATTCTTCGATCCCGCAGGAGGTGGGGATCCAGTCTTATACCAACAC
>gi|197255957|gb|FJ027855.1|_Muscisaxicola_frontalis_voucher_MACN-Or-ct_1324_cytochrome_oxidase_subunit_1_(COI)_gene_partial_cds_mitochondrial
CTATATCTAATTTTTGGCGCCTGGGCCGGAATGATTGGTACCGCCCTAAGCCTCCTTATTCGAGCAGAACTAGGCCAACCAGGAACTCTCCTGGGAGATGATCAGATCTATAATGTGATTGTTACTGCTCATGCCTTCGTGATAATCTTCTTTATAGTGATACCCATTATAATTGGAGGGTTCGGTAACTGACTAGTTCCCCTAATAATTGGAGCCCCCGACATAGCATTTCCTCGTATAAATAATATAAGTTTCTGACTACTCCCTCCATCTTTCCTTCTCCTTTTAGCCTCATCCACAGTTGAAGCCGGTGTAGGAACTGGATGAACTGTATACCCACCATTAGCCGGTAACCTAGCACATGCCGGAGCTTCAGTAGACTTAGCTATCTTCTCCCTTCATCTCGCAGGTGTTTCTTCAATCCTAGGTGCTATCAACTTCATCACCACTGCAATCAATATAAAACCACCAGCCCTATCACAATATCAAACTCCCCTATTCGTATGATCCGTCCTAATTACTGCAGTTCTCCTCCTCCTCTCTCTCCCAGTACTTGCTGCTGGTATCACTATACTGCTTACAGATCGTAATCTTAACACCACATTCTTCGATCCCGCAGGAGGTGGGGATCCAGTCTTATACCAACAC
>gi|197255953|gb|FJ027853.1|_Muscisaxicola_flavinucha_voucher_MACN-Or-ct_1305_cytochrome_oxidase_subunit_1_(COI)_gene_partial_cds_mitochondrial
TTATATCTAATTTTTGGCGCCTGGGCCGGAATGATTGGTACCGCCCTAAGTCTCCTTATTCGAGCAGAACTAGGCCAACCAGGAACTCTCCTAGGAGATGATCAGATCTATAATGTAATTGTTACTGCTCACGCCTTCGTAATAATCTTCTTTATAGTGATACCCATTATAATTGGAGGGTTCGGTAACTGACTAGTTCCCCTAATAATTGGGGCCCCTGACATAGCATTTCCTCGTATAAATAATATAAGTTTCTGACTACTACCTCCATCTTTCCTTCTCCTTTTAGCCTCATCCACAGTTGAAGCCGGTGTAGGAACTGGATGAACTGTATACCCACCATTGGCCGGTAACCTAGCACATGCCGGAGCTTCAGTAGACTTAGCTATCTTCTCCCTTCATCTTGCAGGTGTTTCTTCAATCTTAGGTGCTATCAACTTCATCACTACTGCAATCAATATAAAACCACCAGCCCTATCACAATATCAAACTCCCCTATTCGTATGATCCGTCCTGATTACTGCAGTTCTCCTCCTCCTCTCTCTCCCAGTACTTGCTGCTGGTATCACTATACTACTCACAGATCGTAATCTTAACACTACATTCTTTGATCCCGCAGGAGGTGGGGACCCAGTCTTATATCAACAC
>gi|197255949|gb|FJ027851.1|_Muscisaxicola_flavinucha_voucher_MACN-Or-ct_1301_cytochrome_oxidase_subunit_1_(COI)_gene_partial_cds_mitochondrial
----------------------------------TTGGTACCGCCCTAAGTCTCCTTATTCGAGCAGAACTAGGCCAACCAGGAACTCTCCTAGGAGATGATCAGATCTATAATGTAATTGTTACTGCTCACGCCTTCGTAATAATCTTCTTTATAGTGATACCCATTATAATTGGAGGGTTCGGTAACTGACTAGTTCCCCTAATAATTGGGGCCCCTGACATAGCATTTCCTCGTATAAATAATATAAGTTTCTGACTACTACCTCCATCTTTCCTTCTCCTTTTAGCCTCATCCACAGTTGAAGCCGGTGTAGGAACTGGATGAACTGTATACCCACCATTGGCCGGTAACCTAGCACATGCCGGAGCTTCAGTAGACTTAGCTATCTTCTCCCTTCATCTTGCAGGTGTTTCTTCAATCCTAGGTGCTATCAACTTCATCACTACTGCAATCAATATAAAACCACCAGCCCTATCACAATATCAAACTCCCCTATTCGTATGATCCGTCCTGATTACTGCAGTTCTCCTCCTCCTCTCTCTCCCAGTACTTGCTGCTGGTATCACTATACTACTCACAGATCGTAATCTTAACACTACATTCTTTGATCCCGCAGGAGGTGGGGACCCAGTCTTATATCAACAC
>gi|197255945|gb|FJ027849.1|_Muscisaxicola_capistratus_voucher_MACN-Or-ct_363_cytochrome_oxidase_subunit_1_(COI)_gene_partial_cds_mitochondrial
CTATATNTAATTTTTGGCGCCTGGGCCGGAATGATTGGTACCGCCCTAAGTCTCCTTATTCGAGCAGAACTAGGCCAACCAGGAACTCTCCTAGGAGATGATCAGATCTATAATGTGATTGTTACTGCTCATGCCTTCGTGATAATCTTCTTTATAGTGATACCCATTATAATTGGAGGATTCGGTAACTGACTAGTTCCCCTAATAATTGGAGCCCCCGACATAGCATTTCCTCGTATAAATAATATAAGTTTCTGACTACTACCTCCATCTTTCCTTCTCCTTTTAGCCTCATCCACAGTTGAAGCCGGTGTAGGAACTGGATGAACTGTATACCCACCATTAGCCGGTAACCTAGCACATGCCGGAGCTTCAGTAGACTTAGCTATCTTCTCCCTTCATCTCGCAGGTGTTTCTTCAATCCTAGGTGCTATCAACTTCATCACCACTGCAATCAATATAAAACCACCAGCCCTATCACAATATCAAACTCCCCTATTCGTATGATCCGTCCTAATTACTGCAGTTCTCCTCCTCCTCTCTCTCCCAGTACTTGCTGCTGGTATCACTATACTGCTTACAGATCGTAATCTTAACACCACATTCTTCGATCCCGCAGGAGGTGGGGATCCAGTCTTATACCAACAC
>gi|197255941|gb|FJ027847.1|_Muscisaxicola_albilora_voucher_MACN-Or-ct_1285_cytochrome_oxidase_subunit_1_(COI)_gene_partial_cds_mitochondrial
TTATATCTAATTTTTGGCGCCTGGGCCGGAATGATTGGTACCGCCCTAAGTCTCCTTATTCGAGCAGAACTAGGCCAACCAGGAACTCTCCTAGGAGATGATCAGATCTATAATGTAATTGTTACTGCTCATGCCTTCGTAATAATCTTCTTTATAGTGATACCCATTATAATTGGAGGGTTCGGTAACTGACTAGTTCCCCTAATAATTGGAGCCCCCGACATAGCATTTCCTCGTATAAATAATATAAGTTTCTGACTACTACCCCCATCTTTCCTTCTCCTTTTAGCCTCATCCACAGTTGAAGCAGGTGTAGGAACTGGATGAACTGTATACCCACCATTAGCCGGTAACCTAGCACATGCCGGAGCTTCAGTAGACTTAGCTATCTTCTCTCTTCATCTTGCAGGTGTTTCTTCAATCCTAGGTGCTATCAACTTCATCACCACTGCAATCAATATAAAACCACCAGCCCTATCACAATATCAAACTCCCCTATTCGTATGATCCGTCCTAATTACTGCAGTTCTCCTCCTCCTCTCTCTCCCAGTACTTGCTGCTGGTATCACTATACTGCTTACAGATCGTAATCTTAACACCACATTCTTCGATCCCGCAGGAGGTGGGGATCCAGTCTTATACCAACAC
>gi|197255937|gb|FJ027845.1|_Molothrus_rufoaxillaris_voucher_MACN-Or-ct_2153_cytochrome_oxidase_subunit_1_(COI)_gene_partial_cds_mitochondrial
CTATACCTAATCTTCGGCGCATGAGCCGGAATAGTGGGTACCGCCCTAAGCCTCCTCATTCGAGCAGAACTAGGCCAGCCTGGAGCCCTTCTAGGAGACGATCAAGTCTACAACGTAGTTGTCACGGCCCATGCTTTCGTAATAATCTTCTTCATAGTCATACCAATTATAATCGGAGGGTTCGGAAACTGACTAGTACCTCTAATAATCGGAGCCCCAGACATAGCATTCCCACGAATAAACAACATAAGCTTCTGACTACTCCCCCCATCCTTCCTCCTCCTCCTAGCATCTTCCACAGTTGAGGCAGGCGTAGGCACAGGTTGAACAGTGTACCCCCCACTAGCAGGCAACTTAGCTCACGCCGGAGCCTCAGTCGATCTCGCAATTTTTTCACTACATCTAGCCGGTATCTCTTCAATCCTAGGGGCAATCAACTTTATCACAACTGCAGTCAACATAAAACCCCCCGCCCTATCACAATACCAAACCCCCCTATTCGTTTGATCAGTCCTAATCACTGCAGTGCTGCTACTTCTATCCCTTCCGGTCCTTGCCGCAGGAATTACAATGCTCCTCACAGATCGCAACCTTAACACTACATTCTTTGACCCTGCCGGAGGAGGAGACCCTGTACTATACCAACAC
>gi|197255933|gb|FJ027843.1|_Molothrus_rufoaxillaris_voucher_MACN-Or-ct_2091_cytochrome_oxidase_subunit_1_(COI)_gene_partial_cds_mitochondrial
---------------------TGAGCCGGAATAGTGGGTACCGCCCTAAGCCTCCTCATTCGAGCAGAACTAGGCCAGCCTGGAGCCCTTCTAGGAGACGATCAAGTCTACAACGTAGTTGTCACGGCCCATGCTTTCGTAATAATCTTCTTCATAGTCATACCAATTATAATCGGAGGGTTCGGAAACTGACTAGTACCTCTAATAATCGGAGCCCCAGACATAGCATTCCCACGAATAAACAACATAAGCTTCTGACTACTCCCCCCATCCTTCCTCCTCCTCCTAGCATCTTCCACAGTTGAGGCAGGCGTAGGCACAGGTTGAACAGTGTACCCCCCACTAGCAGGCAACTTAGCTCACGCCGGAGCCTCAGTCGATCTCGCAATTTTTTCACTACATCTAGCCGGTATCTCTTCAATCCTAGGGGCAATCAACTTTATCACAACTGCAGTCAACATAAAACCCCCCGCCCTATCACAATACCAAACCCCCCTATTCGTTTGATCAGTCCTAATCACTGCAGTGCTGCTACTTCTATCCCTTCCGGTCCTTGCCGCAGGAATTACAATGCTCCTCACAGATCGCAACCTTAACACCACATTCTTTGACCCTGCCGGAGGAGGAGACCCTGTACTATACCAACAC
>gi|197255929|gb|FJ027841.1|_Molothrus_bonariensis_voucher_MACN-Or-ct_3266_cytochrome_oxidase_subunit_1_(COI)_gene_partial_cds_mitochondrial
CTATACNTAATTTTCGGTGCATGAGCCGGAATGGTAGGTACCGCTCTAAGCCTCCTCATTCGAGCAGAACTAGGCCAACCTGGAGCCCTTCTAGGAGACGATCAAGTCTACAACGTAGTTGTCACGGCCCATGCTTTCGTAATAATCTTCTTCATAGTTATACCAATTATAATCGGGGGGTTCGGAAACTGACTAGTACCCCTAATAATCGGAGCCCCAGATATAGCATTCCCACGAATAAATAACATGAGCTTCTGACTACTTCCCCCATCCTTCCTCCTTCTCCTAGCATCTTCCACGGTTGAGGCAGGCGTGGGCACAGGCTGAACAGTATACCCCCCACTAGCAGGCAATCTAGCTCACGCCGGAGCTTCAGTCGACCTCGCAATTTTCTCACTGCACCTAGCCGGTATCTCTTCAATCCTAGGAGCAATCAACTTTATTACAACAGCAGTCAACATAAAACCACCTGCCCTATCACAATACCAAACCCCCCTATTCGTTTGATCCGTCCTAATCACTGCAGTACTATTACTCCTATCCCTCCCAGTCCTTGCCGCAGGAATTACAATGCTTCTCACAGACCGCAACCTTAACACCACATTCTTTGATCCTGCCGGAGGAGGAGACCCTGTACTGTACCAACAC
>gi|197255925|gb|FJ027839.1|_Molothrus_bonariensis_voucher_MACN-Or-ct_2779_cytochrome_oxidase_subunit_1_(COI)_gene_partial_cds_mitochondrial
CTATACCTAATTTTCGGTGCATGAGCCGGAATGGTAGGTACCGCTCTAAGCCTCCTCATTCGAGCAGAACTAGGCCAACCTGGAGCCCTTCTAGGAGACGATCAAGTCTACAACGTAGTTGTCACGGCCCATGCTTTCGTAATAATCTTCTTCATAGTTATACCAATTATAATCGGGGGGTTCGGAAACTGACTAGTACCCCTAATAATCGGAGCCCCAGATATAGCATTCCCACGAATAAATAACATGAGCTTCTGACTACTTCCCCCATCCTTCCTCCTTCTCCTAGCATCTTCCACGGTTGAGGCAGGCGTGGGCACAGGCTGAACAGTATACCCCCCACTAGCAGGCAATCTAGCTCACGCCGGAGCTTCAGTCGACCTCGCAATTTTCTCACTGCACCTAGCCGGTATCTCTTCAATCCTAGGAGCAATCAACTTTATTACAACAGCAGTCAACATAAAACCACCTGCCCTATCACAATACCAAACCCCCCTATTCGTTTGATCCGTCCTAATCACTGCAGTACTATTACTCCTATCCCTCCCAGTCCTTGCCGCAGGAATTACAATGCTTCTCACAGACCGCAACCTTAACACCACATTCTTTGATCCTGCCGGAGGAGGAGACCCTGTACTGTACCAACAC
>gi|197255921|gb|FJ027837.1|_Molothrus_bonariensis_voucher_MACN-Or-ct_1488_cytochrome_oxidase_subunit_1_(COI)_gene_partial_cds_mitochondrial
CTATACCTAATTTTCGGTGCATGAGCCGGAATGGTAGGTACCGCTCTAAGCCTCCTCATTCGAGCAGAACTAGGCCAACCTGGAGCCCTTCTAGGAGACGATCAAGTCTACAACGTAGTTGTCACGGCCCATGCTTTCGTAATAATCTTCTTCATAGTTATACCAATTATAATCGGGGGGTTCGGAAACTGACTAGTACCCCTAATAATCGGAGCCCCAGATATAGCATTCCCACGAATAAATAACATGAGCTTCTGACTACTTCCCCCATCCTTCCTCCTTCTCCTAGCATCTTCCACGGTTGAGGCAGGCGTGGGCACAGGCTGAACAGTATACCCCCCACTAGCAGGCAATCTAGCTCACGCCGGAGCTTCAGTCGACCTCGCAATTTTCTCACTGCACCTAGCCGGTATCTCTTCAATCCTAGGAGCAATCAACTTTATTACAACAGCAGTCAACATAAAACCACCTGCCCTATCACAATACCAAACCCCCCTATTCGTTTGATCCGTCCTAATCACTGCAGTACTATTACTCCTATCCCTCCCAGTCCTTGCCGCAGGAATTACAATGCTTCTCACAGACCGCAACCTTAACACCACATTCTTTGATCCTGCCGGAGGAGGAGACCCTGTACTGTACCAACAC
>gi|197255917|gb|FJ027835.1|_Molothrus_bonariensis_voucher_MACN-Or-ct_536_cytochrome_oxidase_subunit_1_(COI)_gene_partial_cds_mitochondrial
CTATACCTAATTTTCGGTGCATGAGCCGGAATGGTAGGTACCGCTCTAAGCCTCCTCATTCGAGCAGAACTAGGCCAACCTGGAGCCCTTCTAGGAGACGATCAAGTCTACAACGTAGTTGTCACGGCCCATGCTTTCGTAATAATCTTCTTCATAGTTATACCAATTATAATCGGGGGGTTCGGAAACTGACTAGTACCCCTAATAATCGGAGCCCCAGATATAGCATTCCCACGAATAAATAACATGAGCTTCTGACTACTTCCCCCATCCTTCCTCCTTCTCCTAGCATCTTCCACGGTTGAGGCAGGCGTGGGCACAGGCTGAACAGTATACCCCCCACTAGCAGGCAATCTAGCTCACGCCGGAGCTTCAGTCGACCTCGCAATTTTCTCACTGCACCTAGCCGGTATCTCTTCAATCCTAGGAGCAATCAACTTTATTACAACAGCAGTCAACATAAAACCACCTGCCCTATCACAATACCAAACCCCCCTATTCGTTTGATCCGTCCTAATCACTGCAGTACTATTACTCCTATCCCTCCCAGTCCTTGCCGCAGGAATTACAATGCTTCTCACAGACCGCAACCTTAACACCACATTCTTTGATCCTGCCGGAGGAGGAGACCCTGTACTGTACCAACAC
>gi|197255913|gb|FJ027833.1|_Mionectes_rufiventris_voucher_MACN-Or-ct_2906_cytochrome_oxidase_subunit_1_(COI)_gene_partial_cds_mitochondrial
CTCTACCTAATCTTCGGCGCCTGAGCTGGTATAATCGGTACCGCCCTAAGCCTCCTCATTCGAGCAGAACTCGGCCAACCAGGAACCCTCCTTGGAGATGACCAAATTTATAACGTAATCGTCACTGCCCATGCATTCGTAATAATCTTCTTTATAGTAATACCTATCATAATTGGAGGCTTCGGCAACTGGCTAGTACCTTTAATGATTGGCGCACCCGACATAGCATTTCCTCGCATAAATAACATAAGCTTTTGACTCCTCCCACCATCATTTCTCCTCCTCCTAGCATCCTCCACAGTAGAAGCTGGAGTCGGAACCGGATGAACTGTATACCCCCCATTAGCCGGAAACATTGCCCACGCTGGAGCCTCAGTAGACCTAGCTATTTTTTCCCTCCACCTAGCAGGAGTATCCTCTATCTTAGGAGCTATTAACTTCATCACAACAGCTATTAACATAAAACCCCCTGCCCTCTCACAATACCAAACCCCCTTGTTCGTGTGATCTGTATTAATCACAGCAGTCCTCCTTCTACTCTCCCTACCAGTCCTTGCCGCTGGCATCACTATGCTCCTAACAGACCGCAACCTAAATACCACCTTCTTCGACCCCTCAGGAGGAGGAGACCCAATCTTATACCAACAC
>gi|197255909|gb|FJ027831.1|_Mionectes_rufiventris_voucher_MACN-Or-ct_2884_cytochrome_oxidase_subunit_1_(COI)_gene_partial_cds_mitochondrial
CTCTACCTAATCTTCGGCGCCTGAGCTGGTATAATCGGTACCGCCCTAAGCCTCCTCATTCGAGCAGAACTCGGCCAACCAGGAACCCTCCTTGGAGATGACCAAATTTATAACGTAATCGTCACTGCCCATGCATTCGTAATAATCTTCTTTATAGTAATACCTATCATAATTGGAGGCTTCGGCAACTGGCTAGTACCTTTAATGATTGGCGCACCCGACATAGCATTTCCTCGCATAAATAACATAAGCTTTTGACTCCTCCCACCATCATTTCTCCTCCTCCTAGCATCCTCCACAGTAGAAGCTGGAGTCGGAACCGGATGAACTGTATACCCCCCATTAGCCGGAAACATTGCCCACGCTGGAGCCTCAGTAGACCTAGCTATTTTTTCCCTCCACCTAGCAGGAGTATCCTCTATCTTAGGGGCTATTAACTTCATCACAACAGCTATTAACATAAAACCCCCTGCCCTCTCACAATACCAAACCCCCTTGTTCGTGTGGTCTGTATTAATCACAGCAGTCCTCCTTCTACTCTCCCTACCAGTCCTTGCCGCTGGCATCACTATGCTCCTAACAGACCGCAACCTAAATACCACCTTCTTCGACCCCTCAGGAGGAGGAGACCCAATCTTATACCAACAC
>gi|197255905|gb|FJ027829.1|_Mimus_triurus_voucher_MACN-Or-ct_2166_cytochrome_oxidase_subunit_1_(COI)_gene_partial_cds_mitochondrial
CTCTACCTAATCTTCGGCGCATGAGCCGGGCTGGTAGGTACCGCCCTAAGCCTCCTTATTCGAGCAGAACTAGGCCAACCTGGAGCCCTACTAGGCGACGACCAAGTCTACAATGTAGTCGTCACAGCCCATGCCTTCGTAATAATCTTCTTTATGGTTATACCAATCATGATCGGGGGATTTGGAAACTGACTAGTCCCCCTAATAATTGGAGCCCCAGACATAGCATTCCCCCGAATAAACAACATAAGCTTCTGACTACTCCCCCCATCCTTCCTCCTGCTCCTAGCATCCTCTACGGTAGAATCAGGGGTAGGAACAGGCTGAACCGTATACCCACCCCTAGCCGGCAACCTAGCCCACGCCGGAGCCTCAGTAGACCTAGCCATTTTCTCCCTCCACCTAGCCGGTATCTCCTCAATTCTAGGGGCTATCAACTTCATCACAACAGCAATTAACATAAAACCACCCGCCCTCTCACAATACCAGACTCCCCTATTCGTCTGATCAGTACTAATCACTGCAGTACTACTCCTCCTATCCCTCCCTGTCCTCGCCGCAGGCATTACCATGCTCCTCACCGACCGCAACCTCAACACCACCTTCTTCGACCCAGCAGGAGGGGGAGACCCAGTACTCTACCAGCAT
>gi|197255901|gb|FJ027827.1|_Mimus_triurus_voucher_MACN-Or-ct_2836_cytochrome_oxidase_subunit_1_(COI)_gene_partial_cds_mitochondrial
CTCTACCTAATCTTCGGCGCATGAGCCGGGATGGTAGGTACCGCCCTAAGCCTCCTTATTCGAGCAGAACTAGGCCAACCTGGAGCCCTACTAGGCGACGACCAAGTCTACAATGTAGTCGTCACAGCCCATGCCTTCGTAATAATCTTCTTTATGGTTATACCAATCATGATCGGGGGATTTGGAAACTGACTAGTCCCCCTAATAATTGGAGCCCCAGACATAGCATTCCCCCGAATAAACAACATAAGCTTCTGACTACTCCCCCCATCCTTCCTCCTGCTCCTAGCATCCTCTACGGTAGAATCAGGGGTAGGAACAGGCTGAACCGTATACCCACCCCTAGCCGGCAACCTAGCCCACGCCGGAGCCTCAGTAGACCTGGCCATTTTCTCCCTCCATCTAGCCGGTATCTCCTCAATTCTAGGGGCTATCAACTTCATCACAACAGCAATTAACATAAAACCACCCGCCCTCTCACAATACCAGACTCCCCTATTCGTCTGATCAGTACTAATCACTGCAGTACTACTCCTCCTATCCCTCCCTGTCCTCGCCGCAGGCATTACCATGCTCCTCACCGACCGCAACCTCAACACCACCTTCTTCGACCCAGCAGGAGGGGGAGACCCAGTACTCTACCAGCAT
>gi|197255897|gb|FJ027825.1|_Mimus_triurus_voucher_MACN-Or-ct_1608_cytochrome_oxidase_subunit_1_(COI)_gene_partial_cds_mitochondrial
CTCTACCTAATCTTCGGCGCATGAGCCGGGATGGTAGGTACCGCCCTAAGCCTCCTTATTCGAGCAGAACTAGGCCAACCTGGAGCCCTACTAGGCGACGACCAAGTCTACAATGTAGTCGTCACAGCCCATGCCTTCGTAATAATCTTCTTTATGGTTATACCAATCATGATCGGGGGATTTGGAAACTGACTAGTCCCCCTAATAATTGGAGCCCCAGACATAGCATTCCCCCGAATAAACAACATAAGCTTCTGACTACTCCCCCCATCCTTCCTCCTGCTCCTAGCATCCTCTACGGTAGAATCAGGGGTAGGAACAGGCTGAACCGTATACCCACCCCTAGCCGGCAACCTAGCCCACGCCGGAGCCTCAGTAGACCTGGCCATTTTCTCCCTCCACCTAGCCGGTATCTCCTCAATTCTAGGGGCTATCAACTTCATCACAACAGCAATTAACATAAAACCACCCGCCCTCTCACAATACCAGACTCCCCTATTCGTCTGATCAGTACTAATCACTGCAGTACTACTCCTCCTATCCCTCCCTGTCCTCGCCGCAGGCATTACCATGCTCCTCACCGACCGCAACCTCAACACCACCTTCTTCGACCCAGCAGGAGGGGGAGACCCAGTACTCTACCAGCAT
>gi|197255893|gb|FJ027823.1|_Mimus_triurus_voucher_MACN-Or-ct_024_cytochrome_oxidase_subunit_1_(COI)_gene_partial_cds_mitochondrial
CTCTACCTAATCTTCGGCGCATGAGCCGGGATGGTAGGTACCGCCCTAAGCCTCCTTATTCGAGCAGAACTAGGCCAACCTGGAGCCCTACTAGGCGACGACCAAGTCTACAATGTAGTCGTCACAGCCCATGCCTTCGTAATAATCTTCTTTATGGTTATACCAATCATGATCGGGGGATTTGGAAACTGACTAGTCCCCCTAATAATTGGAGCCCCAGACATAGCATTCCCCCGAATAAACAACATAAGCTTCTGACTACTCCCCCCATCCTTCCTCCTGCTCCTAGCATCCTCTACGGTAGAATCAGGGGTAGGAACAGGCTGAACCGTATACCCACCCCTAGCCGGCAACCTAGCCCACGCCGGAGCCTCAGTAGACCTGGCCATTTTCTCCCTCCACCTAGCCGGTATCTCCTCAATTCTAGGGGCTATCAACTTCATCACAACAGCAATTAACATAAAACCACCCGCCCTCTCACAATACCAGACTCCCCTATTCGTCTGATCAGTACTAATCACTGCAGTACTACTCCTCCTATCCCTCCCTGTCCTCGCCGCAGGNNTTACCATGCTCCTCACCGACCGCAACCTCAACACCACCTTCTTCGACCCAGCAGGAGGGGGAGACCCAGTACTCTACCAGCAT
>gi|197255889|gb|FJ027821.1|_Mimus_saturninus_voucher_MACN-Or-ct_1422_cytochrome_oxidase_subunit_1_(COI)_gene_partial_cds_mitochondrial
CTCTACCTAATCTTCGGCGCGTGAGCCGGGATGGTAGGTACCGCCCTAAGCCTCCTTATTCGAGCAGAGCTGGGTCAACCTGGAGCCCTACTAGGTGACGACCAGGTCTACAATGTAGTCGTTACAGCCCACGCTTTCGTAATAATCTTCTTTATGGTTATACCAATCATGATCGGGGGATTTGGAAACTGACTAGTCCCCCTAATGATTGGAGCCCCAGATATAGCATTCCCCCGAATAAACAACATAAGCTTTTGACTACTCCCCCCATCCTTCCTCCTACTCCTAGCATCCTCTACAGTAGAATCAGGGGCAGGAACAGGCTGAACCGTATACCCACCCCTGGCCGGCAACCTAGCCCACGCCGGAGCCTCAGTAGACCTGGCTATTTTCTCCCTCCACCTGGCCGGTATCTCCTCAATTCTAGGGGCTATCAACTTCATCACAACAGCAATCAACATAAAACCACCCGCCCTCTCACAATACCAGACTCCCCTATTCGTCTGATCAGTACTAATCACTGCAGTACTACTCCTCCTATCCCTCCCTGTCCTCGCCGCAGGCATTACCATGCTCCTCACCGACCGCAACCTCAACACCACCTTCTTTGACCCAGCAGGAGGAGGAGACCCAGTACTCTACCAACAC
>gi|197255885|gb|FJ027819.1|_Mimus_saturninus_voucher_MACN-Or-ct_268_cytochrome_oxidase_subunit_1_(COI)_gene_partial_cds_mitochondrial
CTCTACCTAATCTTCGGCGCGTGAGCCGGGATGGTAGGTACCGCCCTAAGCCTCCTTATTCGAGCAGAGCTGGGTCAACCTGGAGCCCTACTAGGTGACGACCAGGTCTACAANGTAGTCGTTACAGCCCACGCTTTCGTAATAATCTTCTTTATGGTTATACCAATCATGATCGGGGGATTTGGAAACTGACTAGTCCCCCTAATGATTGGAGCCCCAGATATAGCATTCCCCCGAATAAACAACATAAGCTTTTGACTACTCCCCCCATCCTTCCTCCTACTCCTAGCATCCTCTACAGTAGAATCAGGGGCAGGAACAGGCTGAACCGTATACCCACCCCTGGCCGGCAACCTAGCCCACGCCGGAGCCTCAGTAGACCTGGCTATTTTCTCCCTCCACCTGGCCGGTATCTCCTCAATTCTAGGGGCTATCAACTTCATCACAACAGCAATCAACATAAAACCACCCGCCCTCTCACAATACCAGACTCCCCTGTTCGTCTGATCAGTACTAATCACTGCAGTACTACTCCTCCTATCCCTCCCTGTCCTCGCCGCAGGCATTACCATGCTCCTCACCGACCGCAACCTCAACACCACCTTCTTTGACCCAGCAGGAGGGGGAGACCCAGTACTCTACCAACAC
>gi|197255881|gb|FJ027817.1|_Mimus_saturninus_voucher_MACN-Or-ct_1439_cytochrome_oxidase_subunit_1_(COI)_gene_partial_cds_mitochondrial
CTCTACCTAATCTTCGGCGCGTGAGCCGGGATGGTAGGTACCGCCCTAAGCCTCCTTATTCGAGCAGAGCTGGGTCAACCTGGAGCCCTACTAGGTGACGACCAGGTCTACAATGTAGTCGTTACAGCCCACGCTTTCGTAATAATCTTCTTTATGGTTATACCAATCATGATCGGGGGATTTGGAAACTGACTAGTCCCCCTAATGATTGGAGCCCCAGATATAGCATTCCCCCGAATAAACAACATAAGCTTTTGACTACTCCCCCCATCCTTCCTCCTACTCCTAGCATCCTCTACAGTAGAATCAGGGGCAGGAACAGGCTGAACCGTATACCCACCCCTGGCCGGCAACCTAGCCCACGCCGGAGCCTCAGTAGACCTGGCTATTTTCTCCCTCCACCTGGCCGGTATCTCCTCAATTCTAGGGGCTATCAACTTCATCACAACAGCAATCAACATAAAACCACCCGCCCTCTCACAATACCAGACTCCCCTATTCGTCTGATCAGTACTAATCACTGCAGTACTACTCCTCCTATCCCTCCCTGTCCTCGCCGCAGGCATTACCATGCTCCTCACCGACCGCAACCTCAACACCACCTTCTTTGACCCAGCAGGAGGAGGAGACCCAGTACTCTACCAACAC
>gi|197255877|gb|FJ027815.1|_Mimus_patagonicus_voucher_MACN-Or-ct_2726_cytochrome_oxidase_subunit_1_(COI)_gene_partial_cds_mitochondrial
CTCTACCTAATCTTCGGCGCATGAGCCGGGATGGTAGGCACCGCCCTAAGCCTCCTTATTCGAGCAGAACTAGGCCAACCTGGAGCCCTACTAGGTGACGACCAAGTCTACAATGTAGTCGTCACAGCCCATGCCTTCGTAATAATCTTCTTTATGGTTATACCAATTATGATCGGGGGGTTTGGAAACTGACTAGTCCCCCTAATAATTGGAGCCCCAGACATAGCATTCCCCCGAATAAACAACATAAGCTTCTGGCTACTCCCCCCATCCTTCCTCCTACTCCTAGCATCCTCCACAGTAGAATCAGGAGTAGGGACAGGCTGAACCGTATACCCACCCCTGGCCGGCAACCTAGCCCACGCCGGAGCCTCAGTAGACCTGGCCATTTTCTCCCTCCACCTGGCCGGTATCTCCTCAATTCTAGGGGCTATCAACTTCATCACAACAGCAATTAACATAAAACCACCCGCCCTCTCACAATACCAGACCCCCCTATTCGTCTGATCAGTACTAATTACTGCAGTACTACTCCTCCTATCCCTCCCTGTCCTTGCCGCAGGCATTACCATGCTCCTCACCGACCGCAACCTCAACACCACCTTCTTCGACCCAGCAGGAGGAGGGGACCCAGTACTCTACCAACAC
>gi|197255873|gb|FJ027813.1|_Mimus_patagonicus_voucher_MACN-Or-ct_2709_cytochrome_oxidase_subunit_1_(COI)_gene_partial_cds_mitochondrial
CTCTACCTAATCTTCGGCGCATGAGCCGGGATGGTAGGCACCGCCCTAAGCCTCCTTATTCGAGCAGAACTAGGCCAACCTGGAGCCCTACTAGGTGACGACCAAGTCTACAATGTAGTCGTCACAGCCCATGCCTTCGTAATAATCTTCTTTATGGTTATACCAATTATGATCGGGGGGTTTGGAAACTGACTAGTCCCCCTAATAATTGGAGCCCCAGACATAGCATTCCCCCGAATAAACAACATAAGCTTCTGGCTACTCCCCCCATCCTTCCTCCTACTCCTAGCATCCTCCACAGTAGAATCAGGAGTAGGGACAGGCTGAACCGTATACCCACCCCTGGCCGGCAACCTAGCCCACGCCGGAGCCTCAGTAGACCTGGCCATTTTCTCCCTCCACCTGGCCGGTATCTCCTCAATTCTAGGGGCTATCAACTTCATCACAACAGCAATTAACATAAAACCACCCGCCCTCTCACAATACCAGACCCCCCTATTCGTCTGATCAGTACTAATTACTGCAGTACTACTCCTCCTATCCCTCCCTGTCCTTGCCGCAGGCATTACCATGCTCCTCACCGACCGCAACCTCAACACCACCTTCTTCGACCCAGCAGGAGGAGGGGACCCAGTACTCTACCAACAC
>gi|197255869|gb|FJ027811.1|_Mimus_dorsalis_voucher_MACN-Or-ct_817_cytochrome_oxidase_subunit_1_(COI)_gene_partial_cds_mitochondrial
CTCTACCTAATCTTCGGCGCATGAGCCGGGATGGTAGGTACCGCCCTAAGCCTCCTTATTCGAGCAGAACTAGGCCAACCTGGAGCCCTACTAGGCGACGACCAAGTCTACAATGTAGTCGTCACAGCCCACGCCTTCGTAATAATCTTCTTTATGGTTATACCAATCATGATCGGGGGATTTGGAAACTGACTAGTCCCCCTAATAATTGGAGCCCCAGACATAGCATTCCCCCGAATAAACAACATAAGCTTCTGACTACTCCCCCCATCCTTCCTCCTACTCCTAGCATCCTCTACGGTAGAATCAGGGGTAGGAACAGGCTGAACCGTATACCCACCCCTAGCCGGCAACCTAGCCCACGCCGGAGCCTCAGTAGACCTGGCCATTTTCTCCCTCCACCTAGCCGGTATCTCCTCAATTCTAGGGGCTATCAACTTCATCACAACAGCAATTAACATAAAACCACCCGCCCTCTCACAATACCAGACTCCCCTGTTCGTCTGATCAGTGCTAATCACTGCAGTACTACTCCTCCTATCCCTCCCTGTCCTCGCCGCAGGCATTACCATGCTCCTCACCGACCGCAACCTCAACACCACCTTCTTCGACCCAGCAGGAGGAGGAGACCCAGTACTCTACCAGCAT
>gi|197255865|gb|FJ027809.1|_Mimus_dorsalis_voucher_MACN-Or-ct_1082_cytochrome_oxidase_subunit_1_(COI)_gene_partial_cds_mitochondrial
CTNTACNTAATCTTCGGCGCATGAGCCGGGATGGTAGGTACCGCCCTAAGCCTCCTTATTCGAGCAGAACTAGGCCAACCTGGAGCCCTACTAGGCGACGACCAAGTCTACAATGTAGTCGTCACAGCCCACGCCTTCGTAATAATCTTCTTTATGGTTATACCAATCATGATCGGGGGATTTGGAAACTGACTAGTCCCCCTAATAATTGGAGCCCCAGACATAGCATTCCCCCGAATAAACAACATAAGCTTCTGACTACTCCCCCCATCCTTCCTCCTACTCCTAGCATCCTCTACGGTAGAATCAGGGGTAGGAACAGGCTGAACCGTATACCCACCCCTAGCCGGCAACCTAGCCCACGCCGGAGCCTCAGTAGACCTGGCCATTTTCTCCCTCCACCTGGCCGGTATCTCCTCAATTCTAGGGGCTATCAACTTCATCACAACAGCAATTAACATAAAACCACCCGCCCTCTCACAATACCAGACTCCCCTGTTCGTCTGATCAGTGCTAATCACTGCAGTACTACTCCTCCTATCCCTCCCTGTCCTCGCCGCAGGCATTACCATGCTCCTCACCGACCGCAACCTCAACACCACCTTCTTCGACCCAGCAGGAGGAGGAGACCCAGTACTCTACCAGCAT
>gi|197255861|gb|FJ027807.1|_Milvago_chimachima_voucher_MACN-Or-ct_1628_cytochrome_oxidase_subunit_1_(COI)_gene_partial_cds_mitochondrial
CTATACCTTCTCTTCGGAGCATGAGCCGGCATAGTTGGCACCGCCCTTAGCCTACTCATTCGCGCAGAACTAGGCCAACCAGGAACCCTCCTAGGGGATGACCAAATTTACAACGTAATCGTCACCGCCCACGCCTTTGTAATAATCTTCTTCATAGTAATACCCATCATAATCGGAGGCTTTGGAAACTGACTAGTCCCACTCATAATCGGCGCCCCAGACATAGCATTTCCCCGAATAAACAACATAAGCTTCTGACTCTTACCCCCATCATTCCTCCTATTACTAGCCTCCTCCACAGTAGAAGCCGGAGCCGGTACTGGATGAACCGTATACCCTCCCTTAGCAGGCAACCTAGCCCATGCCGGCGCCTCAGTAGACTTAGCCATCTTCTCCCTCCACTTAGCAGGAGTATCCTCCATTCTAGGTGCAATCAACTTCATCACAACAGCTATTAACATAAAACCGCCTGCCCTTTCACAATACCAAACCCCCCTTTTCGTCTGATCCGTCCTTATTACTGCCGTCCTCCTTCTACTCTCATTACCAGTCCTTGCCGCAGGCATTACCATACTACTAACCGACCGAAACCTAAATACCACATTCTTCGACCCAGCCGGAGGCGGAGACCCTATCCTATACCAACAC
>gi|197255857|gb|FJ027805.1|_Milvago_chimachima_voucher_MACN-Or-ct_1607_cytochrome_oxidase_subunit_1_(COI)_gene_partial_cds_mitochondrial
CTATACCTTCTCTTCGGAGCATGAGCCGGCATAGTTGGCACCGCCCTTAGCCTACTCATTCGCGCAGAACTAGGCCAACCAGGAACCCTCCTAGGGGATGACCAAATTTACAACGTAATCGTCACCGCCCACGCCTTTGTAATAATCTTCTTCATAGTAATACCCATCATAATCGGAGGCTTTGGAAACTGACTAGTCCCACTCATAATCGGCGCCCCAGACATAGCATTTCCCCGAATAAACAACATAAGCTTCTGACTCTTACCCCCATCATTCCTCCTATTACTAGCCTCCTCCACAGTAGAAGCCGGAGCCGGTACTGGATGAACCGTATACCCTCCCTTAGCAGGCAACCTAGCCCATGCCGGCGCCTCAGTAGACTTAGCCATCTTCTCCCTCCACTTAGCAGGAGTATCCTCCATTCTAGGTGCAATCAACTTCATCACAACAGCTATTAACATAAAACCGCCTGCCCTTTCACAATACCAAACCCCCCTTTTCGTCTGATCCGTCCTTATTACTGCCGTCCTCCTTCTACTCTCATTACCAGTCCTTGCCGCAGGCATTACCATACTACTAACCGACCGAAACCTAAATACCACATTCTTCGACCCAGCCGGAGGCGGAGACCCTATCCTATACCAACAC
>gi|197255853|gb|FJ027803.1|_Metriopelia_melanoptera_voucher_MACN-Or-ct_855_cytochrome_oxidase_subunit_1_(COI)_gene_partial_cds_mitochondrial
CTATACCTAATCTTTGGTGCATGGGCCGGCATAATCGGCACCGCACTCAGCCTGCTCATTCGAGCAGAATTAGGACAACCAGGCACTCTTCTAGGAGACGACCAAATCTATAATGTAATCGTCACCGCCCACGCTTTCGTAATAATTTTCTTCATAGTTATACCAATCATGATCGGAGGCTTCGGAAACTGACTAGTCCCCCTTATAATTGGCGCACCCGACATAGCATTCCCCCGTATAAACAACATAAGCTTCTGACTTCTCCCCCCATCTTTCCTGCTCCTCCTAGCCTCCTCCACAGTCGAAGCCGGCGCTGGTACAGGATGAACCGTATACCCCCCTCTAGCTGGCAACTTAGCACATGCCGGAGCCTCGGTAGACTTAGCCATCTTCTCCCTTCACCTCGCAGGTATCTCCTCCATCCTAGGGGCTATCAACTTCATCACAACCGCCATCAACATAAAACCCCCAGCCTTATCACAATACCAAACTCCCCTGTTCGTTTGATCAGTCCTTATCACTGCTGTTCTCCTTCTCCTCTCCCTACCAGTCCTTGCCGCTGGCATTACCATACTACTCACAGACCGAAACCTAAACACCACATTCTTCGACCCTGCTGGCGGAGGAGACCCAGTGCTCTATCAACAC
>gi|197255849|gb|FJ027801.1|_Metriopelia_aymara_voucher_MACN-Or-ct_1274_cytochrome_oxidase_subunit_1_(COI)_gene_partial_cds_mitochondrial
CTATACCTAATCTTCGGCGCATGAGCTGGTATAATCGGCACTGCACTCAGCCTCCTCATTCGCGCAGAACTAGGACAACCAGGCACCCTTCTAGGAGACGACCAAATTTATAACGTTATTGTCACTGCCCACGCCTTCGTCATGATTTTCTTCATAGTTATACCAATTATAATTGGAGGATTCGGAAACTGACTAGTCCCCCTCATAATTGGCGCGCCCGACATAGCATTCCCCCGTATAAACAACATAAGCTTCTGACTCCTCCCCCCATCCTTCTTACTCCTCCTAGCCTCCTCTACAGTCGAAGCCGGCGCAGGTACAGGATGAACCGTATACCCCCCTCTAGCCGGCAACCTAGCACATGCCGGAGCCTCAGTAGACCTAGCCATCTTCTCCCTCCACCTCGCAGGTATCTCCTCCATCCTGGGGGCTATCAACTTCATCACAACTGCCATTAACATAAAACCACCAGCCTTATCGCAATATCAAACCCCCCTATTTGTTTGATCAGTCCTTATTACCGCCGTCCTCCTTCTCCTCTCCCTACCAGTCCTTGCCGCCGGCATCACTATACTACTTACAGACCGAAACTTAAACACCACATTCTTTGACCCCGCTGGAGGAGGAGACCCAGTACTCTACCAACAC
>gi|197255845|gb|FJ027799.1|_Metriopelia_aymara_voucher_MACN-Or-ct_1063_cytochrome_oxidase_subunit_1_(COI)_gene_partial_cds_mitochondrial
CTATACCTAATCTTCGGCGCATGAGCTGGTATAATCGGCACTGCACTCAGCCTCCTCATTCGCGCAGAACTAGGACAACCAGGCACCCTTCTAGGAGACGACCAAATTTATAACGTTATTGTCACTGCCCACGCCTTCGTCATGATTTTCTTCATAGTTATACCAATTATAATTGGAGGATTCGGAAACTGACTAGTCCCCCTCATAATTGGCGCGCCCGACATAGCATTCCCCCGTATAAACAACATAAGCTTCTGACTCCTCCCCCCATCCTTCTTACTCCTCCTAGCCTCCTCTACAGTCGAAGCCGGCGCAGGTACAGGATGAACCGTATACCCCCCTCTAGCCGGCAACCTAGCACATGCCGGAGCCTCAGTAGACCTAGCCATCTTCTCCCTCCACCTCGCAGGTATCTCCTCCATCCTGGGGGCTATCAACTTCATCACAACTGCCATTAACATAAAACCACCAGCCTTATCGCAATATCAAACCCCCCTATTTGTTTGATCAGTCCTTATTACCGCCGTCCTCCTTCTCCTCTCCCTACCAGTCCTTGCCGCCGGCATCACTATACTACTTACAGACCGAAACTTAAACACCACATTCTTTGACCCCGCTGGAGGAGGAGACCCAGTACTCTACCAACAC
>gi|197255841|gb|FJ027797.1|_Melanodera_melanodera_voucher_MACN-Or-ct_208_cytochrome_oxidase_subunit_1_(COI)_gene_partial_cds_mitochondrial
CTGTATNTAATCTTCGGCGCATGAGCCGGAATAGTAGGTACTGCCCTAAGCCTCCTCATCCGAGCAGAACTAGGTCAACCTGGAGCCCTTCTAGGAGACGACCAAGTATACAATGTAGTCGTCACGGCCCATGCTTTCGTAATAATTTTCTTCATAGTCATGCCAATTATAATCGGAGGGTTTGGAAACTGACTAGTCCCCCTAATAATTGGAGCCCCAGACATAGCATTTCCACGAATAAACAACATAAGCTTCTGATTACTTCCCCCATCCTTCCTTCTCCTCCTAGCATCCTCCACAGTCGAAGCAGGTGTAGGCACAGGCTGAACGGTATACCCTCCCCTAGCCGGAAACTTGGCCCACGCCGGAGCCTCTGTTGACTTAGCAATTTTCTCCCTACATCTAGCCGGCATCTCCTCAATTCTAGGAGCAATTAACTTCATCACAACAGCAATCAACATAAAACCTCCTGCCCTCTCACAATATCAAACCCCCCTATTCGTCTGATCAGTTCTAATTACTGCCGTCCTACTGCTCCTTTCCCTCCCAGTCCTCGCCGCAGGAATTACAATACTCCTTACAGATCGCAACCTTAACACTACATTCTTCGACCCCGCTGGAGGAGGAGACCCAGTCCTATATCAACAT
>gi|197255837|gb|FJ027795.1|_Melanerpes_candidus_voucher_MACN-Or-ct_2137_cytochrome_oxidase_subunit_1_(COI)_gene_partial_cds_mitochondrial
CNTTACNTCATTTTTGGCGCATGAGCTGGCATAATCGGCACAGCCCTTAGCCTCCTCATTCGTGCTGAATTAGGCCAACCTGGCACCCTCCTCGGCGATGACCAAATTTATAACGTAATCGTCACTGCCCACGCATTCGTAATAATCTTCTTCATAGTCATACCCATCATAATTGGAGGATTCGGAAACTGGCTCGTCCCCCTTATAATTGGGGCCCCAGACATAGCATTCCCCCGAATAAACAACATGAGCTTCTGACTCCTTCCCCCATCATTCCTGCTCCTTCTAGCCTCCTCTACAGTAGAAGCAGGAGCCGGAACAGGATGAACTGTCTATCCACCCCTCGCCGGCAACCTAGCCCACGCAGGAGCTTCAGTAGACCTAGCCATTTTCTCCCTTCACCTAGCAGGTATTTCATCCATTTTAGGAGCAATCAATTTCATCACAACAGCCATCAACATAAAACCCCCAGCCATCTCTCAATACCAAACCCCCCTATTTGTCTGATCCGTCCTCATCACTGCCGTCCTCCTTCTCTTATCCCTCCCGGTCCTCGCCGCCGGTATTACAATACTTCTTACAGACCGCAACCTAAACACCACATTTTTTGATCCAGCCGGAGGAGGCGATCCAATCCTCTACCAACAT
>gi|197255833|gb|FJ027793.1|_Melanerpes_candidus_voucher_MACN-Or-ct_1716_cytochrome_oxidase_subunit_1_(COI)_gene_partial_cds_mitochondrial
CTGTACCTCATTTTTGGCGCATGAGCTGGCATAATCGGCACAGCCCTTAGCCTCCTCATTCGTGCTGAATTAGGCCAACCTGGCACCCTCCTCGGCGATGACCAAATTTATAACGTAATCGTCACTGCCCACGCATTCGTAATAATCTTCTTCATAGTCATACCCATCATAATTGGAGGATTCGGAAACTGGCTCGTCCCCCTTATAATTGGGGCCCCAGACATAGCATTCCCCCGAATAAACAACATGAGCTTCTGACTCCTTCCCCCATCATTCCTGCTCCTTCTAGCCTCCTCTACAGTAGAAGCAGGAGCCGGAACAGGATGAACTGTCTATCCACCCCTCGCCGGCAACCTAGCCCACGCAGGAGCTTCGGTAGACCTAGCCATTTTCTCCCTTCACCTAGCAGGTATTTCATCCATTTTAGGAGCAATCAATTTCATCACAACAGCCATCAACATAAAACCCCCAGCCATCTCTCAATACCAAACCCCCCTATTTGTCTGATCCGTCCTCATCACTGCCGTCCTCCTTCTCTTATCCCTCCCGGTCCTCGCCGCCGGTATTACAATACTTCTTACAGACCGCAACCTAAACACCACATTTTTTGATCCAGCCGGAGGAGGCGATCCAATCCTCTACCAACAT
>gi|197255829|gb|FJ027791.1|_Melanerpes_candidus_voucher_MACN-Or-ct_1652_cytochrome_oxidase_subunit_1_(COI)_gene_partial_cds_mitochondrial
CTGTACCTCATTTTTGGCGCATGAGCTGGCATAATCGGCACAGCCCTTAGCCTCCTCATTCGTGCTGAATTAGGCCAACCTGGCACCCTCCTCGGCGATGACCAAATTTATAACGTAATCGTCACTGCCCACGCATTCGTAATAATCTTCTTCATAGTCATACCCATCATAATCGGAGGATTCGGAAACTGGCTCGTCCCCCTTATAATTGGGGCCCCAGACATAGCATTCCCCCGAATAAACAACATGAGCTTCTGACTCCTTCCCCCATCATTCCTGCTCCTTCTAGCCTCCTCTACAGTAGAAGCAGGAGCCGGAACAGGATGAACTGTCTATCCACCCCTCGCCGGCAACCTAGCCCACGCAGGAGCTTCGGTAGACCTAGCCATTTTCTCCCTTCACCTAGCAGGTATTTCATCCATTTTAGGAGCAATCAATTTCATCACAACAGCCATCAACATAAAACCCCCAGCCATCTCTCAATACCAAACCCCCCTATTTGTCTGATCCGTCCTCATCACTGCCGTCCTCCTTCTCTTATCCCTCCCGGTCCTCGCCGCCGGTATTACAATACTTCTTACAGACCGCAACCTAAACACCACATTTTTTGATCCAGCCGGAGGAGGCGATCCAATCCTCTACCAACAT
>gi|197255825|gb|FJ027789.1|_Melanerpes_cactorum_voucher_MACN-Or-ct_3224_cytochrome_oxidase_subunit_1_(COI)_gene_partial_cds_mitochondrial
-------TCATCTTTGGTGCATGAGCCGGCATAATCGGCACAGCCCTCAGCCTACTCATTCGCGCTGAACTAGGTCAACCCGGCACCCTCCTTGGTGATGACCAAATTTATAACGTAATCGTCACTGCCCACGCATTCGTAATAATCTTCTTCATAGTCATACCCATCATAATCGGAGGATTTGGAAATTGACTTGTTCCCCTCATAATCGGAGCCCCCGACATAGCATTTCCCCGAATAAACAACATAAGCTTCTGACTTCTTCCCCCATCTTTCCTTCTCCTCCTAGCCTCCTCCACAGTAGAAGCAGGAGCTGGAACAGGATGAACCGTTTATCCACCCCTTGCTGGTAACCTAGCCCATGCAGGGGCCTCAGTAGACCTGGCCATCTTCTCACTTCACCTAGCAGGTATTTCATCTATTCTAGGGGCAATCAACTTCATCACAACAGCTATCAACATAAAACCCCCAGCCATTTCTCAATATCAGACCCCCTTATTCGTCTGATCTGTCCTCATCACCGCTGTCCTCCTTCTCCTATCCCTCCCAGTCCTTGCCGCCGGTATTACAATACTCCTTACAGACCGCAACCTAAACACCACATTCTTTGACCCAGCTGGAGGAGGAGACCCAATCCTCTACCAACAC
>gi|197255821|gb|FJ027787.1|_Melanerpes_cactorum_voucher_MACN-Or-ct_3164_cytochrome_oxidase_subunit_1_(COI)_gene_partial_cds_mitochondrial
-------------------CATGAGCCGGCATAATCGGCACAGCCCTCAGCCTACTCATTCGCGCTGAACTAGGTCAACCCGGCACCCTCCTTGGTGATGACCAAATTTATAACGTAATCGTCACTGCCCACGCATTCGTAATAATCTTCTTCATAGTCATACCCATCATAATCGGAGGATTTGGAAATTGACTTGTTCCCCTCATAATCGGAGCCCCCGACATAGCATTTCCCCGAATAAACAACATAAGCTTCTGACTTCTTCCCCCATCTTTCCTTCTCCTCCTAGCCTCCTCCACAGTAGAAGCAGGAGCTGGAACAGGATGAACCGTTTATCCACCCCTTGCTGGTAACCTAGCCCATGCAGGGGCCTCAGTAGACCTGGCCATCTTCTCACTTCATCTAGCAGGTATTTCATCTATTCTAGGGGCAATCAACTTCATCACAACAGCTATCAACATAAAACCCCCAGCCATTTCTCAATATCAGACCCCCTTATTCGTCTGATCTGTCCTCATCACCGCTGTCCTCCTTCTCCTATCCCTCCCAGTCCTTGCCGCCGGTATTACAATACTCCTTACAGACCGCAACCTAAACACCACATTCTTTGACCCAGCTGGAGGAGGAGACCCAATCCTCTACCAACAC
>gi|197255817|gb|FJ027785.1|_Megascops_choliba_voucher_MACN-Or-ct_1672_cytochrome_oxidase_subunit_1_(COI)_gene_partial_cds_mitochondrial
CTGTACCTAATCTTCGGCGCATGAGCAGGAATAGTTGGCACCGCCCTTAGCCTCCTCATCCGAGCCGAACTAGGACAACCAGGGACACTCCTTGGCGATGACCAAATCTACAACGTGATCGTCACCGCCCATGCCTTCGTAATGATCTTCTTCATAGTTATGCCAGTCATGATTGGAGGATTTGGAAACTGATTAGTCCCACTAATAATTGGAGCTCCAGACATAGCCTTCCCACGCATAAACAATATAAGCTTCTGACTACTCCCACCATCATTCCTACTCTTACTAGCCTCCTCCACAGTAGAAGCTGGAGCGGGCACCGGATGGACAGTATACCCACCACTAGCCAGCAACCTAGCCCATGCCGGAGCCTCAGTCGACCTGGCAATCTTTTCACTACATCTAGCTGGAGTATCGTCCATTCTAGGGGCAATCAACTTCATCACCACCGCCATCAACATAAAACCTCCGTCTCTAACTCAATATCAAACCCCCCTATTCGTATGATCCGTCCTCATTACTGCCATCCTTCTCCTGCTATCCCTCCCAGTACTTGCTGCTGGTATCACCATACTACTAACCGACCGCAACCTAAACACCACATTTTTTGATCCGGCCGGCGGGGGCGACCCCGTACTGTACCAGCAC
>gi|197255813|gb|FJ027783.1|_Megascops_choliba_voucher_MACN-Or-ct_3047_cytochrome_oxidase_subunit_1_(COI)_gene_partial_cds_mitochondrial
CTGTACCTAATCTTCGGCGCATGAGCAGGAATAGTTGGCACCGCCCTTAGCCTCCTCATCCGAGCCGAACTAGGACAACCAGGGACACTCCTTGGCGATGACCAAATCTACAACGTGATCGTCACCGCCCATGCCTTCGTAATGATCTTCTTCATAGTTATGCCAGTCATGATTGGAGGATTTGGAAACTGATTAGTCCCACTAATAATTGGAGCTCCAGACATAGCCTTCCCACGCATAAACAATATAAGCTTCTGACTACTCCCACCATCATTCCTACTCTTACTAGCCTCCTCCACAGTAGAAGCTGGAGCGGGCACCGGATGGACAGTATACCCACCACTAGCCAGCAACCTAGCCCATGCCGGAGCCTCAGTCGACCTGGCAATCTTTTCACTACATCTAGCTGGAGTATCGTCCATTCTAGGGGCAATCAACTTCATCACCACCGCCATCAACATAAAACCTCCGTCTCTAACTCAATATCAAACCCCCCTATTCGTATGATCCGTCCTCATTACTGCCATCCTTCTCCTGCTATCCCTCCCAGTACTTGCTGCTGGTATCACCATACTACTAACCGACCGCAACCTAAACACCACATTTTTTGATCCGGCCGGCGGGGGCGACCCCGTACTGTACCAGCAC
>gi|197255809|gb|FJ027781.1|_Megaceryle_torquata_voucher_MACN-Or-ct_2129_cytochrome_oxidase_subunit_1_(COI)_gene_partial_cds_mitochondrial
TTATACTTAATCTTCGGAGCATGAGNTGGCATAGTAGGTACTGCCCTCAGCNTGNTCATCCGAGCAGAANTAGGCCAACNTGGCACACTCCTAGGAGACGACCAAATCTACAATGTAATCGTTACAGCCCATGCCTTCGTCATAATTTTCTTTATAGTAATACCCATCATAATCGGGGGATTCGGAAACTGACTTGTGCCTTTAATAATTGGAGCCCCAGACATAGCATTTCCACGCATAAACAATATAAGCTTCTGACTCCTGCCCCCTTCATTCCTTCTCCTTCTCGCCTCCTCTACAGTAGAAGCAGGCGCAGGTACAGGATGAACGGTCTACCCGCCCCTCGCCGGCAACCTAGCTCACGCAGGAGCTTCAGTAGACTTAGCCATCTTCTCCCTTCACTTAGCAGGGGTATCTTCTATCTTAGGAGCAATCAACTTCATTACCACTGCCACCAACATAAAACCCCCAGCCTTGTCACAATACCAAACACCCTTGTTCGTCTGATCAGTCCTAATCACCGCTGTCCTTCTTTTACTATCCCTACCCGTACTTGCCGCTGGCATTACAATACTCCTCACAGACCGCAACTTAAACACCACATTCTTCGACCCAGCTGGAGGAGGTGACCCTATCTTATACCAACAC
>gi|197255805|gb|FJ027779.1|_Megaceryle_torquata_voucher_MACN-Or-ct_1718_cytochrome_oxidase_subunit_1_(COI)_gene_partial_cds_mitochondrial
TTATACTTAATCTTCGGAGCATGAGCTGGCATAGTAGGTACTGCCCTCAGCCTGCTCATCCGAGCAGAACTAGGCCAACCTGGCACACTCCTAGGAGACGACCAAATCTACAATGTAATCGTTACAGCCCATGCCTTCGTCATAATTTTCTTTATAGTAATACCCATCATAATCGGGGGATTCGGAAACTGACTTGTGCCTTTAATAATTGGAGCCCCAGACATAGCATTTCCACGCATAAACAATATAAGCTTCTGACTCCTGCCCCCTTCATTCCTCCTCCTTCTCGCCTCCTCTACAGTAGAAGCAGGCGCAGGTACAGGATGAACGGTCTACCCGCCCCTCGCCGGCAACCTAGCTCACGCAGGAGCTTCAGTAGACTTAGCCATCTTCTCCCTTCACTTAGCAGGGGTATCTTCTATCTTAGGAGCAATCAACTTCATTACCACTGCCACCAACATAAAACCCCCAGCCTTGTCACAATACCAAACACCCTTGTTCGTCTGATCAGTCCTAATCACCGCTGTCCTTCTTTTACTATCCCTACCTGTACTTGCCGCTGGCATTACAATACTCCTCACAGACCGCAACTTAAACACCACATTCTTCGACCCAGCTGGAGGAGGTGACCCTATCTTATACCAACAC
>gi|197255801|gb|FJ027777.1|_Mecocerculus_leucophrys_voucher_MACN-Or-ct_921_cytochrome_oxidase_subunit_1_(COI)_gene_partial_cds_mitochondrial
TTATACTTAATTTTTGGCGCCTGGGCCGGTATAATTGGCACCGCCCTGAGCCTTCTTATTCGAGCAGAACTTGGACAACCAGGAACTCTCCTAGGAGACGACCAGATCTACAATGTAATTGTTACTGCCCATGCTTTCGTAATAATCTTCTTTATAGTTATACCTATCATAATCGGAGGATTTGGTAACTGACTAGTTCCCTTAATAATTGGCGCCCCAGACATAGCATTTCCTCGTATAAACAATATAAGCTTTTGACTACTTCCCCCATCATTTCTCCTCCTCTTAGCCTCCTCCACAGTAGAAGCTGGAGTAGGAACTGGATGAACTGTTTACCCACCATTAGCTGGAAATCTAGCCCATGCTGGTGCTTCAGTAGACCTAGCTATCTTCTCCCTTCACCTCGCAGGTGTTTCCTCAATCTTAGGTGCTATCAACTTCATTACCACTGCAATCAACATAAAACCACCAGCTCTCTCACAATATCAAACACCCCTATTCGTTTGATCCGTCCTGATTACTGCAGTCCTATTACTCCTCTCCCTACCAGTCCTTGCTGCTGGTATTACTATGCTTTTAACAGATCGTAACCTCAATACTACATTCTTCGATCCTGCAGGAGGTGGAGACCCAGTCTTATACCAACAT
>gi|197255797|gb|FJ027775.1|_Mecocerculus_leucophrys_voucher_MACN-Or-ct_735_cytochrome_oxidase_subunit_1_(COI)_gene_partial_cds_mitochondrial
TTATACTTAATTTTTGGCGCCTGGGCCGGTATAATTGGCACCGCCCTGAGCCTTCTTATTCGAGCAGAACTTGGACAACCAGGAACTCTCCTAGGAGACGACCAGATCTACAATGTAATTGTTACTGCCCATGCTTTCGTAATAATCTTCTTTATAGTTATACCTATCATAATCGGAGGATTTGGTAACTGACTAGTTCCCTTAATAATTGGCGCCCCAGACATAGCATTTCCTCGTATAAACAATATAAGCTTTTGACTACTTCCCCCATCATTTCTCCTCCTCTTAGCCTCCTCCACAGTAGAAGCTGGAGTAGGAACTGGATGAACTGTTTACCCACCATTAGCTGGAAATCTAGCCCATGCTGGTGCTTCAGTAGACCTAGCTATCTTCTCCCTTCACCTCGCAGGTGTTTCCTCAATCTTAGGTGCTATCAACTTCATTACCACTGCAATCAACATAAAACCACCAGCTCTCTCACAATATCAAACACCCCTATTCGTTTGATCCGTCCTGATTACTGCAGTCCTATTACTCCTCTCCCTACCAGTCCTTGCTGCTGGTATTACTATGCTTTTAACAGATCGTAACCTCAATACTACATTCTTCGATCCTGCAGGAGGTGGAGACCCAGTCTTATACCAACAT
>gi|197255793|gb|FJ027773.1|_Manacus_manacus_voucher_MACN-Or-ct_2876_cytochrome_oxidase_subunit_1_(COI)_gene_partial_cds_mitochondrial
CTTTACCTTATTTTTGGCGCATGAGCTGGTATAATCGGCACAGCCCTTAGTCTCCTCATTCGAGCAGAACTAGGACAGCCAGGCACCCTTTTAGGCGATGACCAAATTTACAATGTAATCGTCACCGCACATGCCTTCGTTATAATTTTCTTTATAGTAATGCCTATTATAATCGGAGGGTTTGGTAACTGATTAGTACCATTAATAATTGGTGCCCCCGACATAGCATTTCCACGAATAAATAACATGAGCTTCTGACTACTTCCTCCATCCTTCCTACTTCTTCTAGCATCTTCTACAGTAGAAGCCGGGGCCGGAACAGGATGAACAGTATACCCACCCCTAGCCGGAAATCTAGCCCACGCCGGTGCATCAGTAGACCTTGCCATCTTCTCCCTTCACCTGGCAGGTGTCTCATCCATCCTTGGGGCAATCAACTTTATCACCACAGCAATCAATATAAAACCACCTGCTCTCTCACAATACCAAACCCCTCTATTCGTTTGATCCGTCCTAATTACTGCAGTTCTACTTCTCCTCTCCCTACCAGTCCTCGCTGCTGGCATTACAATGCTTCTAACAGATCGAAACCTAAACACTACATTCTTTGACCCCGCAGGAGGCGGAGACCCAATTTTATATCAACAC
>gi|197255789|gb|FJ027771.1|_Manacus_manacus_voucher_MACN-Or-ct_3042_cytochrome_oxidase_subunit_1_(COI)_gene_partial_cds_mitochondrial
CTTTACCTTATTTTTGGCGCATGAGCTGGTATAATCGGCACAGCCCTTAGTCTCCTCATTCGAGCAGAACTAGGACAGCCAGGCACCCTTTTAGGCGATGACCAAATTTACAATGTAATCGTCACCGCACATGCCTTCGTTATAATTTTCTTTATAGTAATGCCTATTATAATCGGAGGGTTTGGTAACTGATTAGTACCATTAATAATTGGTGCCCCCGACATAGCATTTCCACGAATAAATAACATGAGCTTCTGACTACTTCCTCCATCCTTCCTACTTCTTCTAGCATCTTCTACAGTAGAAGCCGGGGCCGGAACAGGATGAACAGTATACCCACCCCTAGCCGGAAATCTAGCCCACGCCGGTGCATCAGTAGACCTTGCCATCTTCTCCCTTCACCTGGCAGGTGTCTCATCCATCCTTGGGGCAATCAACTTTATCACCACAGCAATCAATATAAAACCACCTGCTCTCTCACAATACCAAACCCCTCTATTCGTTTGATCCGTCCTAATTACTGCAGTTCTACTTCTCCTCTCCCTACCAGTCCTCGCTGCTGGCATTACAATGCTTCTAACAGATCGAAACCTAAACACTACATTCTTTGACCCCGCAGGAGGCGGAGACCCAATTTTATATCAACAC
>gi|197255785|gb|FJ027769.1|_Manacus_manacus_voucher_MACN-Or-ct_2880_cytochrome_oxidase_subunit_1_(COI)_gene_partial_cds_mitochondrial
CTTTACCTTATTTTTGGTGCATGAGCTGGTATAATCGGCACAGCCCTTAGTCTCCTCATTCGAGCAGAACTAGGGCAGCCAGGCACCCTTTTAGGCGATGACCAAATTTACAATGTAATCGTCACCGCACATGCCTTCGTTATGATTTTCTTTATAGTAATGCCTATTATAATCGGGGGATTTGGTAACTGATTAGTACCTCTAATAATTGGTGCCCCCGACATAGCATTTCCACGAATAAATAACATGAGCTTCTGATTACTTCCCCCATCCTTCCTACTTCTCCTAGCATCTTCTACAGTTGAAGCCGGAGTCGGAACAGGATGAACAGTATACCCACCCTTAGCCGGAAATCTAGCCCACGCCGGTGCATCAGTAGACCTTGCTATCTTCTCCCTTCACCTGGCAGGTGTCTCATCCATCCTTGGAGCAATCAACTTTATCACCACAGCAATCAATATAAAACCACCTGCTCTCTCACAATACCAGACCCCCCTATTCGTCTGATCTGTCCTAATTACTGCAGTCCTACTTCTCCTCTCCCTACCAGTCCTCGCTGCTGGCATTACAATGCTTCTAACAGATCGAAACCTAAACACCACATTCTTTGACCCCGCAGGAGGCGGAGACCCAATTTTATATCAACAC
>gi|197255781|gb|FJ027767.1|_Machetornis_rixosa_voucher_MACN-Or-ct_1506_cytochrome_oxidase_subunit_1_(COI)_gene_partial_cds_mitochondrial
CTATATTTAATTTTTGGAGCCTGAGCCGGCATAATTGGTACAGCCCTAAGCCTCCTTATCCGAGCAGAACTAGGACAACCAGGAACCCTCCTGGGAGACGATCAAATCTACAATGTGATCGTTACTGCTCATGCTTTCGTAATAATCTTCTTTATAGTAATACCCATTATAATTGGAGGATTCGGTAACTGACTAGTTCCCCTAATAATTGGCGCACCTGACATAGCATTCCCACGTATAAACAACATAAGCTTCTGACTACTCCCTCCATCATTCCTCCTTCTTCTAGCCTCATCTACAGTAGAAGCTGGAGTAGGAACCGGATGAACTGTCTATCCACCATTAGCTGGCAACTTAGCACATGCTGGAGCTTCAGTAGACCTAGCTATCTTCTCCCTTCACCTTGCAGGAGTCTCCTCAATCCTAGGTGCCATCAACTTCATTACTACTGCAATCAACATAAAACCTCCCGCCCTGTCACAATACCAAACACCCCTATTCGTATGATCTGTCCTAATTACTGCAGTCCTCCTTCTCCTCTCTCTTCCTGTACTTGCTGCTGGTATTACAATACTTCTAACAGATCGCAACCTTAACACTACATTCTTCGACCCTGCGGGAGGAGGAGATCCAGTTTTATACCAACAT
>gi|197255777|gb|FJ027765.1|_Machetornis_rixosa_voucher_MACN-Or-ct_3234_cytochrome_oxidase_subunit_1_(COI)_gene_partial_cds_mitochondrial
CTATATNTAATTTTTGGAGCNTGAGCCGGCATAATTGGTACAGCCCTAAGCCTCCTTATCCGAGCAGAACTAGGACAACCAGGAACCCTCCTGGGAGACGATCAAATCTACAATGTGATCGTTACTGCTCATGCTTTCGTAATAATCTTCTTTATAGTAATACCCATTATAATTGGAGGATTCGGTAACTGACTAGTTCCCCTAATAATTGGCGCACCTGACATAGCATTCCCACGTATAAACAACATAAGCTTCTGACTACTCCCTCCATCATTCCTCCTTCTTCTAGCCTCATCTACAGTAGAAGCTGGAGTAGGAACCGGATGAACTGTCTATCCACCATTAGCTGGCAACTTAGCACATGCTGGAGCTTCAGTAGACCTAGCTATCTTCTCCCTTCACCTTGCAGGAGTCTCCTCAATCCTAGGTGCCATCAACTTCATTACTACTGCAATCAACATAAAACCTCCCGCCCTGTCACAATACCAAACACCCCTATTCGTATGATCTGTCCTAATTACTGCAGTCCTCCTTCTCCTCTCTCTTCCTGTACTTGCTGCTGGTATTACAATACTTCTAACAGATCGCAACCTTAACACTACATTCTTCGACCCTGCGGGAGGAGGAGATCCAGTTTTATACCAACAT
>gi|197255773|gb|FJ027763.1|_Amazilia_chionogaster_voucher_MACN-Or-ct_911_cytochrome_oxidase_subunit_1_(COI)_gene_partial_cds_mitochondrial
CTGTACCTAATCTTCGGAGCATGAGCCGGAATAGTTGGAACCGCCCTCAGCCTGTTAATTCGAGCAGAACTTGGCCAACCAGGCACCCTACTAGGAGACGACCAAATCTATAATGTAATCGTCACCGCTCATGCCTTCGTAATAATTTTCTTTATAGTCATGCCAATCATGATCGGGGGCTTTGGAAACTGACTAGTCCCCCTAATAATTGGAGCACCCGACATAGCGTTTCCCCGTATAAACAACATAAGCTTTTGACTCTTACCACCATCATTTCTCCTCCTTCTAGCCTCCTCCACCGTAGAAGCAGGCGCGGGCACAGGATGAACCGTCTACCCCCCACTAGCTGGCAACCTAGCCCATGCAGGAGCATCAGTAGACCTAGCAATCTTCTCCCTACATCTATCTGGCATCTCATCAATCCTAGGAGCAATCAACTTTATTACCACTGCAATCAACATAAAACCTCCCGCCCTATCACAATACCAAACTCCCCTATTCGTCTGATCAGTCCTCATCACTGCCGTCTTACTACTCCTCTCACTCCCAGTACTCGCTGCCGGAATTACCATACTACTCACGGATCGAAACCTAAACACTACATTCTTTGACCCCGCTGGGGGAGGAGACCCCATCCTCTACCAACAT
>gi|197255769|gb|FJ027761.1|_Amazilia_chionogaster_voucher_MACN-Or-ct_723_cytochrome_oxidase_subunit_1_(COI)_gene_partial_cds_mitochondrial
CTGTACNTAATCTTCGGAGCATGAGCCGGAATAGTGGGAACCGCCCTCAGCCTGTTAATTCGAGCAGAACTTGGCCAACCAGGCACCCTNCTAGGAGACGACCAAATCTATAATGTAATCGTCACCGCTCATGCCTTCGTAATAATTTTCTTTATAGTCATGCCAATCATGATCGGGGGCTTTGGAAACTGACTAGTCCCCCTAATAATTGGAGCACCCGACATAGCGTTTCCCCGTATAAACAACATAAGCTTTTGACTCTTACCACCATCATTTCTCCTCCTTCTAGCCTCCTCCACCGTAGAAGCAGGCGCGGGCACAGGATGAACCGTCTACCCCCCACTAGCTGGCAACCTAGCCCATGCAGGAGCATCAGTAGACCTAGCAATCTTCTCCCTACATCTATCTGGCATCTCATCAATCCTAGGAGCAATCAACTTTATTACCACTGCAATCAACATAAAACCTCCCGCCCTATCACAATACCAAACTCCCCTATTCGTCTGATCAGTCCTCATCACTGCCGTCTTACTACTCCTCTCACTCCCAGTACTCGCTGCCGGAATTACCATACTACTCACAGATCGAAACCTAAACACTACATTCTTTGACCCCGCTGGGGGAGGAGACCCCATCCTCTACCAACAT
>gi|197255765|gb|FJ027759.1|_Lessonia_rufa_voucher_MACN-Or-ct_2651_cytochrome_oxidase_subunit_1_(COI)_gene_partial_cds_mitochondrial
CTGTACCTAATTTTTGGCGCCTGGGCCGGAATAATTGGTACCGCCCTAAGCCTCCTTATCCGAGCAGAACTGGGGCAACCAGGAACGCTCCTAGGAGATGACCAGATCTACAATGTAATTGTCACTGCCCATGCTTTCGTAATAATCTTCTTTATAGTCATGCCTATCATGATTGGAGGGTTCGGCAACTGATTAGTACCCCTAATAATTGGTGCCCCTGACATAGCATTCCCCCGTATAAACAATATAAGCTTCTGACTATTACCTCCATCATTCCTTCTTCTATTAGCCTCATCCACAGTTGAAGCCGGGGCAGGAACCGGATGAACCGTTTATCCCCCCCTAGCCGGCAACCTAGCACATGCTGGAGCTTCAGTCGACCTAGCCATCTTCTCTCTTCACCTTGCAGGTGTTTCCTCAATTCTAGGAGCCATCAACTTCATCACAACTGCAATTAACATAAAACCACCTGCCCTATCACAATACCAAACCCCCCTATTCGTATGGTCCGTCCTAATCACTGCAGTTCTCCTTCTGCTCTCCCTTCCAGTACTCGCTGCCGGTATTACCATGCTACTTACAGATCGAAACCTCAACACCACATTCTTTGATCCCGCAGGAGGTGGAGACCCAGTCTTATACCAACAT
>gi|197255761|gb|FJ027757.1|_Lessonia_rufa_voucher_MACN-Or-ct_560_cytochrome_oxidase_subunit_1_(COI)_gene_partial_cds_mitochondrial
CTGTACCTAATTTTTGGCGCCTGGGCCGGAATAATTGGTACCGCCCTAAGCCTCCTTATCCGAGCAGAACTGGGGCAACCAGGAACGCTCCTAGGAGATGACCAGATCTACAATGTAATTGTCACTGCCCATGCTTTCGTAATAATCTTCTTTATAGTCATGCCTATCATGATTGGAGGGTTCGGCAACTGATTAGTACCCCTAATAATTGGGGCCCCTGACATAGCATTCCCCCGTATAAACAATATAAGCTTCTGATTACTACCTCCATCATTCCTTCTTCTATTAGCCTCCTCCACAGTTGAAGCCGGGGCAGGAACCGGATGAACCGTTTATCCCCCCCTAGCCGGTAACCTAGCACATGCTGGAGCTTCAGTCGACCTAGCCATCTTCTCACTTCACCTTGCAGGTGTTTCCTCAATTCTAGGAGCCATCAACTTCATCACAACTGCAATTAACATAAAACCACCTGCCCTATCACAATACCAAACTCCCCTATTCGTATGGTCCGTCCTAATCACTGCAGTTCTCCTTCTGCTCTCCCTTCCAGTACTCGCTGCCGGTATTACCATGCTACTTACAGATCGAAACCTCAATACCACATTCTTTGATCCCGCAGGAGGTGGAGACCCAGTCTTATACCAACAT
>gi|197255757|gb|FJ027755.1|_Lessonia_rufa_voucher_MACN-Or-ct_570_cytochrome_oxidase_subunit_1_(COI)_gene_partial_cds_mitochondrial
CTGTACCTAATTTTTGGCGCCTGGGCCGGAATAATTGGTACCGCCCTAAGCCTCCTTATCCGAGCAGAACTGGGGCAACCAGGAACGCTCCTAGGAGATGACCAGATCTACAATGTAATTGTCACTGCCCATGCTTTCGTAATAATCTTCTTTATAGTCATGCCTATCATGATTGGAGGGTTCGGCAACTGATTAGTACCCCTAATAATTGGTGCCCCTGACATAGCATTCCCCCGTATAAACAATATAAGCTTCTGACTATTACCTCCATCATTCCTTCTTCTATTAGCCTCATCCACAGTTGAAGCCGGGGCAGGAACCGGATGAACCGTTTATCCCCCCCTAGCCGGCAACCTAGCACATGCTGGAGCTTCAGTCGACCTAGCCATCTTCTCTCTTCACCTTGCAGGTGTTTCCTCAATTCTAGGAGCCATCAACTTCATCACAACTGCAATTAACATAAAACCACCTGCCCTATCACAATACCAAACTCCCCTATTCGTATGGTCCGTCCTAATCACTGCAGTTCTCCTTCTGCTCTCCCTTCCAGTACTCGCTGCCGGTATTACCATGCTACTTACAGATCGAAACCTCAACACCACATTCTTTGATCCCGCAGGAGGTGGAGACCCAGTCTTATACCAACAT
>gi|197255753|gb|FJ027753.1|_Lessonia_oreas_voucher_MACN-Or-ct_1281_cytochrome_oxidase_subunit_1_(COI)_gene_partial_cds_mitochondrial
CTGTACCTAATTTTTGGCGCCTGGGCCGGAATAATTGGTACCGCCCTAAGCCTCCTTATCCGCGCAGAGCTGGGACAACCAGGAACGCTCCTAGGAGATGACCAGATCTACAATGTAATTGTCACTGCCCATGCCTTCGTAATAATCTTCTTTATAGTCATGCCTATTATAATTGGAGGGTTCGGCAACTGATTAGTTCCCCTAATAATTGGTGCCCCCGACATAGCATTCCCCCGTATAAACAATATAAGCTTCTGACTACTACCTCCATCATTCCTCCTTCTATTAGCCTCATCCACAGTTGAAGCCGGGGCAGGAACCGGATGAACCGTTTATCCCCCCCTAGCCGGCAACCTAGCACATGCTGGAGCTTCAGTCGACCTAGCTATCTTCTCACTTCACCTTGCAGGTGTTTCCTCAATTCTAGGAGCCATCAACTTCATCACAACTGCAATCAATATAAAACCACCCGCCCTATCACAATACCAAACTCCCCTATTCGTATGGTCCGTCCTAATCACTGCAGTTCTCCTTCTGCTCTCCCTTCCAGTACTCGCTGCTGGTATCACCATGCTACTTACAGATCGAAACCTCAACACCACATTCTTTGATCCTGCAGGAGGCGGAGACCCAGTCTTATACCAACAT
>gi|197255749|gb|FJ027751.1|_Lessonia_oreas_voucher_MACN-Or-ct_862_cytochrome_oxidase_subunit_1_(COI)_gene_partial_cds_mitochondrial
CTGTACCTAATTTTTGGCGCCTGGGCCGGAATAATTGGTACCGCCCTAAGCCTCCTTATCCGCGCAGAGCTGGGACAACCAGGAACGCTCCTAGGAGATGACCAGATCTACAATGTAATTGTCACTGCCCATGCCTTCGTAATAATCTTCTTTATAGTCATGCCTATTATAATTGGAGGGTTCGGCAACTGATTAGTTCCCCTAATAATTGGTGCCCCCGACATAGCATTCCCCCGTATAAACAATATAAGCTTCTGACTACTACCTCCATCATTCCTCCTTCTATTAGCCTCATCCACAGTTGAAGCCGGGGCAGGAACCGGATGAACCGTTTATCCCCCCCTAGCCGGCAACCTAGCACATGCTGGAGCTTCAGTCGACCTAGCTATCTTCTCACTTCACCTTGCAGGTGTTTCCTCAATTCTAGGAGCCATCAACTTCATCACAACTGCAATCAATATAAAACCACCCGCCCTATCACAATACCAAACTCCCCTATTCGTATGGTCCGTCCTAATCACTGCAGTTCTCCTTCTGCTCTCCCTTCCAGTACTCGCTGCTGGTATCACCATGCTACTTACAGATCGAAACCTCAACACCACATTCTTTGATCCTGCAGGAGGCGGAGACCCAGTCTTATACCAACAT
>gi|197255745|gb|FJ027749.1|_Lessonia_oreas_voucher_MACN-Or-ct_1083_cytochrome_oxidase_subunit_1_(COI)_gene_partial_cds_mitochondrial
CTGTACCTAATTTTTGGCGCCTGGGCCGGAATAATTGGTACCGCCCTAAGCCTCCTTATCCGCGCAGAGCTGGGACAACCAGGAACGCTCCTAGGAGATGACCAGATCTACAATGTAATTGTCACTGCCCATGCCTTCGTAATAATCTTCTTTATAGTCATGCCTATTATAATTGGAGGGTTCGGCAACTGATTAGTTCCCCTAATAATTGGTGCCCCCGACATAGCATTCCCCCGTATAAACAATATAAGCTTCTGACTACTACCTCCATCATTCCTCCTTCTATTAGCCTCATCCACAGTTGAAGCCGGGGCAGGAACCGGATGAACCGTTTATCCCCCCCTAGCCGGCAACCTAGCACATGCTGGAGCTTCAGTCGACCTAGCTATCTTCTCACTTCACCTTGCAGGTGTTTCCTCAATTCTAGGAGCCATCAACTTCATCACAACTGCAATCAATATAAAACCACCCGCCCTATCACAATACCAAACTCCCCTATTCGTATGGTCCGTCCTAATCACTGCAGTTCTCCTTCTGCTCTCCCTTCCAGTACTCGCTGCTGGTATCACCATGCTACTTACAGATCGAAACCTCAACACCACATTCTTTGATCCTGCAGGAGGCGGAGACCCAGTCTTATACCAACAT
>gi|197255741|gb|FJ027747.1|_Leptotila_verreauxi_voucher_MACN-Or-ct_1417_cytochrome_oxidase_subunit_1_(COI)_gene_partial_cds_mitochondrial
CTATACCTAATCTTCGGCGCATGAGCAGGCATAGTTGGTACCGCACTTAGCCTCCTTATTCGCGCAGAATTAGGACAACCCGGTACACTCCTAGGAGATGACCAAATCTACAATGTAATTGTTACAGCTCATGCCTTTGTAATAATTTTCTTCATAGTTATACCGATCATGATCGGAGGTTTTGGAAACTGACTAGTCCCCCTCATAATTGGAGCCCCTGACATAGCATTCCCACGAATAAACAACATAAGCTTCTGACTACTCCCTCCATCCTTCCTCCTCCTCCTAGCCTCCTCCACAGTAGAAGCCGGCGCTGGAACAGGATGGACCGTATACCCTCCCCTGGCTGGCAACCTAGCCCATGCTGGAGCCTCCGTAGACCTAGCCATCTTCTCCCTCCACCTAGCCGGTGTTTCCTCCATCCTAGGGGCTATCAACTTTATCACAACCGCCATCAACATAAAACCTCCAGCTCTCTCACAATACCAAACCCCCCTATTTGTATGATCAGTCCTCATCACTGCTGTCCTCCTCCTTCTATCCCTCCCAGTCCTTGCCGCTGGCATCACCATACTACTTACAGACCGTAACCTAAACACTACATTCTTTGACCCTGCCGGCGGAGGTGATCCAGTATTATACCAACAC
>gi|197255737|gb|FJ027745.1|_Leptotila_verreauxi_voucher_MACN-Or-ct_2962_cytochrome_oxidase_subunit_1_(COI)_gene_partial_cds_mitochondrial
CTATACCTAATNTTCGGCGCATGAGCAGGCATAGTTGGTACCGCACTTAGCCTCCTTATTCGCGCAGAATTAGGACAACCCGGTACACTCCTAGGAGATGACCAAATCTACAATGTAGTTGTTACAGCTCATGCCTTTGTAATAATCTTCTTCATGGTTATACCAATCATGATCGGAGGTTTTGGAAACTGACTAGTCCCCCTCATAATTGGAGCCCCTGACATAGCATTCCCACGAATAAACAACATAAGCTTCTGACTACTCCCCCCATCCTTCCTCCTCCTCCTAGCCTCCTCCACAGTAGAAGCCGGCGCTGGAACAGGATGGACCGTATACCCTCCCCTGGCTGGCAACCTAGCCCATGCTGGAGCCTCCGTAGACCTGGCCATCTTCTCCCTCCACCTAGCCGGTGTTTCCTCCATCCTAGGGGCTATCAACTTTATCACAACCGCCATCAACATAAAACCTCCAGCTCTCTCACAATACCAAACCCCCCTATTTGTATGATCAGTCCTCATCACTGCTGTCCTCCTCCTTCTATCCCTCCCAGTCCTTGCCGCTGGCATCACCATACTACTTACAGACCGTAACCTAAACACTACATTCTTTGACCCTGCCGGCGGAGGTGATCCAGTATTATACCAACAC
>gi|197255733|gb|FJ027743.1|_Leptotila_verreauxi_voucher_MACN-Or-ct_3152_cytochrome_oxidase_subunit_1_(COI)_gene_partial_cds_mitochondrial
CTATACNTAATCTTCGGCGCATGAGCAGGCATAGTTGGTACCGCACTTAGCCTCCTTATTCGCGCAGAATTAGGACAACCCGGTACACTCCTAGGAGATGACCAAATCTACAATGTAGTTGTTACAGCTCATGCCTTTGTAATAATCTTCTTCATAGTTATACCGATCATGATCGGAGGTTTTGGAAACTGACTAGTCCCCCTCATAATTGGAGCCCCTGACATAGCATTCCCACGAATAAACAACATAAGCTTCTGACTACTCCCTCCATCCTTCCTCCTCCTCCTAGCCTCCTCCACAGTAGAAGCCGGCGCTGGAACAGGATGAACCGTATACCCTCCCCTGGCTGGCAACCTAGCCCATGCTGGAGCCTCCGTAGACCTAGCCATCTTCTCCCTCCACCTAGCCGGTGTTTCCTCCATCCTAGGGGCTATCAACTTTATCACAACCGCCATCAACATAAAACCTCCAGCTCTCTCACAATACCAAACCCCCCTATTTGTATGATCAGTCCTCATCACTGCTGTCCTCCTCCTTCTATCCCTCCCAGTCCTTGCCGCTGGCATCACCATACTACTTACAGACCGTAACCTAAACACCACATTCTTTGACCCTGCCGGCGGAGGTGATCCAGTATTATATCAACAC
>gi|197255729|gb|FJ027741.1|_Leptotila_megalura_voucher_MACN-Or-ct_914_cytochrome_oxidase_subunit_1_(COI)_gene_partial_cds_mitochondrial
CTATACCTAATTTTCGGCGCATGAGCCGGCATAGTTGGCACCGCCCTTAGCCTCCTTATTCGCGCAGAGCTAGGACAACCCGGCACTCTCCTAGGAGACGACCAAATCTACAACGTAATTGTTACAGCCCACGCCTTTGTAATAATCTTCTTCATAGTTATACCAATCATGATCGGGGGCTTTGGGAACTGATTAGTCCCACTCATAATCGGAGCCCCTGACATAGCATTCCCACGAATAAACAACATAAGCTTCTGACTACTACCCCCATCCTTCCTCCTCCTCCTAGCCTCCTCCACAGTTGAAGCTGGTGCCGGAACAGGATGAACTGTGTACCCTCCCCTAGCCGGCAACCTAGCCCATGCTGGAGCCTCCGTAGACCTAGCCATCTTTTCACTCCACCTAGCCGGTGTCTCCTCTATCCTAGGGGCTATTAACTTTATTACAACCGCCATCAACATAAAACCCCCAGCCCTGTCACAATACCAAACCCCCCTGTTCGTATGGTCAGTTCTCATCACCGCTGTCCTCCTTCTCCTATCCCTCCCAGTCCTTGCCGCTGGCATCACTATACTACTTACAGACCGCAACCTGAACACTACATTCTTTGATCCTGCAGGCGGAGGTGACCCAGTACTATACCAACAC
>gi|197255725|gb|FJ027739.1|_Leptopogon_amaurocephalus_voucher_MACN-Or-ct_1979_cytochrome_oxidase_subunit_1_(COI)_gene_partial_cds_mitochondrial
CTCTACCTAATTTTCGGTGCCTGAGCCGGCATAATTGGAACTGCCCTAAGCCTCCTCATTCGAGCTGAACTAGGCCAACCAGGCACACTCCTAGGAGACGACCAAATCTACAATGTAATCGTTACCGCTCATGCATTCGTAATAATTTTCTTTATAGTTATACCCATTATAATTGGAGGCTTCGGCAACTGACTAGTCCCCCTAATAATTGGTGCACCAGATATAGCATTCCCACGCATAAACAACATGAGTTTCTGACTCCTCCCACCATCCTTTCTCCTCCTACTAGCTTCCTCTACAGTGGAAGCTGGGGTGGGTACAGGATGAACTGTATACCCCCCTCTAGCCGGCAACATCGCCCACGCTGGCGCCTCAGTAGACCTAGCTATCTTCTCTCTCCACCTAGCTGGTGTCTCCTCTATTCTCGGTGCCATTAACTTCATTACAACAGCAATCAACATAAAACCCCCAACCCTATCACAATACCAAACACCCCTATTTGTATGATCTGTCTTAATTACAGCTGTACTTCTCCTCCTCTCCCTACCAGTTCTCGCCGCAGGCATTACAATACTCCTAACCGACCGTAACCTAAATACCACCTTCTTTGACCCTGCAGGAGGCGGAGACCCAGTTTTATACCAACAT
>gi|197255721|gb|FJ027737.1|_Leptopogon_amaurocephalus_voucher_MACN-Or-ct_2963_cytochrome_oxidase_subunit_1_(COI)_gene_partial_cds_mitochondrial
CTCTACCTAATTTTCGGTGCCTGAGCCGGCATAATTGGAACTGCCCTAAGCCTCCTCATTCGAGCTGAACTAGGCCAACCAGGCACACTCCTAGGAGACGACCAAATCTACAATGTAATCGTTACCGCTCATGCATTCGTAATAATTTTCTTTATAGTTATACCCATTATAATTGGAGGCTTCGGCAACTGACTAGTCCCCCTAATAATTGGTGCACCAGATATAGCATTCCCACGCATAAACAACATGAGTTTCTGACTCCTCCCACCATCCTTTCTCCTCCTACTAGCTTCCTCTACAGTGGAAGCTGGGGTGGGTACAGGATGAACTGTATACCCCCCTCTAGCCGGCAACATCGCCCACGCTGGCGCCTCAGTAGACCTAGCTATCTTCTCTCTCCACCTAGCTGGTGTCTCCTCTATTCTCGGTGCCATTAACTTCATTACAACAGCAATCAACATAAAACCCCCAACCCTATCACAATACCAAACACCCCTATTTGTATGATCTGTCTTAATTACAGCTGTACTTCTCCTCCTCTCCCTACCAGTTCTCGCCGCAGGCATTACAATACTCCTAACCGACCGTAACCTAAATACCACCTTCTTTGACCCTGCAGGAGGCGGAGACCCAGTTTTATACCAACAT
>gi|197255717|gb|FJ027735.1|_Leptopogon_amaurocephalus_voucher_MACN-Or-ct_2935_cytochrome_oxidase_subunit_1_(COI)_gene_partial_cds_mitochondrial
CTCTACCTAATTTTCGGTGCCTGAGCCGGCATAATTGGAACTGCCCTAAGCCTCCTCATTCGAGCTGAACTAGGCCAACCAGGCACACTCCTAGGAGACGACCAAATCTACAATGTAATCGTTACCGCTCATGCATTCGTAATAATTTTCTTTATAGTTATACCCATTATAATTGGAGGCTTCGGCAACTGACTAGTCCCCCTAATAATTGGTGCACCAGATATAGCATTCCCACGCATAAACAACATAAGTTTCTGACTCCTCCCACCATCCTTTCTCCTCCTACTAGCTTCCTCTACAGTGGAAGCTGGGGTGGGTACAGGATGAACTGTATACCCCCCTCTAGCCGGCAACATCGCCCACGCTGGCGCCTCAGTAGACCTAGCTATCTTCTCTCTCCACCTAGCTGGTGTCTCCTCTATTCTCGGTGCCATTAACTTCATTACAACAGCAATCAACATAAAACCCCCAACCCTATCACAATACCAAACACCCCTATTTGTATGATCTGTCTTAATTACAGCTGTACTTCTCCTCCTCTCCCTACCAGTTCTCGCCGCAGGCATTACAATACTCCTAACCGACCGTAACCTAAATACCACCTTCTTTGACCCTGCAGGAGGCGGAGACCCAGTTTTATACCAACAT
>gi|197255713|gb|FJ027733.1|_Leptasthenura_fuliginiceps_voucher_MACN-Or-ct_1052_cytochrome_oxidase_subunit_1_(COI)_gene_partial_cds_mitochondrial
CTTTACCTAATTTTCGGAGCATGAGCTGGAATAATCGGAACAGCTCTTAGCCTCCTAATTCGAGCTGAACTTGGACAACCAGGTACCCTCTTAGGTGACGATCAAATTTATAACGTAATTGTTACCGCTCATGCTTTCGTAATAATCTTCTTTATAGTTATACCAATTATAATTGGAGGCTTTGGCAATTGATTAGTCCCACTAATAATTGGTGCCCCAGACATAGCCTTCCCCCGAATAAATAACATAAGCTTCTGACTCCTACCCCCATCTTTTTTACTCCTACTAGCCTCCTCAACTGTAGAAGCCGGAGTAGGAACTGGATGGACAGTCTACCCCCCACTAGCAGGTAATTTAGCTCACGCTGGAGCCTCCGTCGATCTAGCCATCTTCTCCCTTCACCTTGCTGGTGTATCCTCCATCCTAGGAGCTATCAACTTCATCACAACCGCTATTAACATAAAACCACCAGCCCTCTCACAGTATCAAACCCCACTATTCGTCTGATCCGTCCTCATCACCGCCGTCCTTCTTCTTCTCTCTCTCCCCGTCTTAGCTGCTGGCATCACAATGCTACTCACAGACCGCAACCTCAACACCACATTCTTTGACCCTGCCGGAGGCGGAGACCCAATCTTATACCAACAT
>gi|197255709|gb|FJ027731.1|_Leptasthenura_fuliginiceps_voucher_MACN-Or-ct_1047_cytochrome_oxidase_subunit_1_(COI)_gene_partial_cds_mitochondrial
CTTTACCTAATTTTCGGAGCATGAGCTGGAATAATCGGAACAGCTCTTAGCCTCCTAATTCGAGCTGAACTTGGACAACCAGGTACCCTCTTAGGTGACGATCAAATTTATAACGTAATTGTTACCGCTCATGCTTTCGTAATAATCTTCTTTATAGTTATACCAATTATAATTGGAGGCTTTGGCAATTGATTAGTCCCACTAATAATTGGTGCCCCAGACATAGCCTTCCCCCGAATAAATAACATAAGCTTCTGACTCCTACCCCCATCTTTTTTACTCCTACTAGCCTCCTCAACTGTAGAAGCCGGAGTAGGAACTGGATGGACAGTCTACCCCCCACTAGCAGGTAATTTAGCTCACGCTGGAGCCTCCGTCGATCTAGCCATCTTCTCCCTTCACCTTGCTGGTGTATCCTCCATCCTAGGAGCTATCAACTTCATCACAACCGCTATTAACATAAAACCACCAGCCCTCTCACAGTATCAAACCCCACTATTCGTCTGATCCGTCCTCATCACCGCCGTCCTTCTTCTTCTCTCTCTCCCCGTCTTAGCTGCTGGCATCACAATGCTACTCACAGACCGCAACCTCAACACCACATTCTTTGACCCTGCCGGAGGCGGAGACCCAATCTTATACCAACAT
>gi|197255705|gb|FJ027729.1|_Leptasthenura_aegithaloides_voucher_MACN-Or-ct_3012_cytochrome_oxidase_subunit_1_(COI)_gene_partial_cds_mitochondrial
CTTTATCTAATTTTCGGGGCATGAGCTGGAATAATCGGAACAGCTCTCAGCCTACTAATTCGAGCTGAACTTGGACAACCAGGTACCCTCCTAGGTGACGACCAAATTTATAATGTAATTGTCACCGCTCATGCTTTCGTAATAATCTTCTTTATAGTTATGCCCATTATAATTGGAGGCTTTGGCAACTGATTAGTTCCACTAATAATTGGTGCCCCAGACATAGCCTTCCCTCGAATAAACAATATAAGCTTCTGACTCCTACCCCCATCTTTTTTACTCCTACTAGCCTCCTCAACTGTAGAAGCCGGAGTAGGAACAGGATGAACAGTTTACCCCCCACTAGCAGGTAACTTAGCTCACGCTGGAGCCTCCGTCGACCTAGCCATCTTCTCTCTTCACCTCGCTGGTGTATCTTCCATTCTAGGAGCTATTAACTTTATCACAACCGCTATTAACATAAAACCACCAGCCCTCTCACAATATCAAACTCCACTATTCGTCTGATCCGTCCTCATCACCGCCGTCCTTCTCCTCCTCTCTCTCCCCGTCTTAGCCGCTGGCATTACAATGCTACTCACAGACCGTAACCTCAACACTACATTCTTTGACCCTGCTGGAGGCGGAGACCCAGTTCTATACCAACAT
>gi|197255701|gb|FJ027727.1|_Leptasthenura_aegithaloides_voucher_MACN-Or-ct_2995_cytochrome_oxidase_subunit_1_(COI)_gene_partial_cds_mitochondrial
CTTTATCTAATTTTCGGGGCATGAGCTGGAATAATCGGAACAGCTCTCAGCCTACTAATTCGAGCTGAACTTGGACAACCAGGTACCCTCCTAGGTGACGACCAAATTTATAATGTAATTGTCACCGCTCATGCTTTCGTAATAATCTTCTTTATAGTTATGCCCATTATAATTGGAGGCTTTGGCAACTGATTAGTTCCACTAATAATTGGTGCCCCAGACATAGCCTTCCCTCGAATAAACAATATAAGCTTCTGACTCCTACCCCCATCTTTTTTACTCCTACTAGCCTCCTCAACTGTAGAAGCCGGAGTAGGAACAGGATGAACAGTTTACCCCCCACTAGCAGGTAACTTAGCTCACGCTGGAGCCTCCGTCGACCTAGCCATCTTCTCTCTTCACCTCGCTGGTGTATCTTCCATTCTAGGAGCTATTAACTTTATCACAACCGCTATTAACATAAAACCACCAGCCCTCTCACAATATCAAACTCCACTATTCGTCTGATCCGTCCTCATCACCGCCGTCCTTCTCCTCCTCTCTCTCCCCGTCTTAGCCGCTGGCATTACAATGCTACTCACAGACCGTAACCTCAACACTACATTCTTTGACCCTGCTGGAGGCGGAGACCCAGTTCTATACCAACAT
>gi|197255697|gb|FJ027725.1|_Leptasthenura_aegithaloides_voucher_MACN-Or-ct_604_cytochrome_oxidase_subunit_1_(COI)_gene_partial_cds_mitochondrial
CTTTATTTAATTTTCGGGGCATGAGCTGGAATAATCGGAACAGCTCTCAGCCTACTAATTCGAGCTGAACTTGGACAACCAGGTACCCTCCTAGGTGACGACCAAATTTATAATGTAATTGTCACCGCTCATGCTTTCGTAATAATCTTCTTTATAGTTATGCCCATTATAATTGGAGGCTTTGGCAACTGATTAGTTCCACTAATAATTGGTGCCCCAGACATAGCCTTCCCTCGAATAAACAATATAAGCTTCTGACTCCTACCCCCATCTTTTTTACTCCTACTAGCCTCCTCAACTGTAGAAGCCGGAGTAGGAACAGGATGAACAGTTTACCCCCCACTAGCAGGTAACTTAGCTCACGCTGGAGCCTCCGTCGACCTAGCCATCTTCTCTCTTCACCTCGCTGGTGTATCTTCCATTCTAGGAGCTATTAACTTTATCACAACCGCTATTAACATAAAACCACCAGCCCTTTCACAATATCAAACTCCACTATTCGTCTGATCCGTCCTCATCACCGCCGTCCTTCTCCTCCTCTCTCTCCCCGTCTTAGCCGCTGGCATTACAATGCTACTCACAGACCGTAACCTCAACACTACATTCTTTGACCCTGCTGGAGGCGGAGACCCAGTTCTATACCAACAT
>gi|197255693|gb|FJ027723.1|_Leptasthenura_aegithaloides_voucher_MACN-Or-ct_1073_cytochrome_oxidase_subunit_1_(COI)_gene_partial_cds_mitochondrial
CTTTACCTAATTTTCGGGGCATGAGCTGGAATAATCGGAACAGCTCTCAGCCTACTAATCCGAGCTGAACTTGGACAACCAGGTACCCTCTTAGGTGACGACCAAATTTATAATGTAATTGTTACCGCTCATGCTTTCGTAATAATCTTCTTTATAGTTATGCCCATTATAATTGGAGGCTTTGGCAACTGATTAGTTCCACTAATAATTGGTGCCCCAGACATAGCTTTCCCCCGAATAAACAACATAAGCTTCTGACTCCTACCCCCATCTTTTTTACTCCTACTAGCCTCCTCGACTGTAGAAGCCGGAGTAGGAACCGGATGAACAGTTTACCCCCCACTAGCAGGTAACTTAGCCCACGCTGGAGCCTCCGTTGACCTAGCCATCTTCTCTCTTCACCTCGCCGGTGTATCTTCCATTCTAGGGGCTATCAACTTTATCACGACCGCTATTAACATAAAACCGCCAGCCCTCTCACAATATCAAACCCCACTATTCGTCTGATCCGTCCTCATCACTGCCGTCCTTCTCCTCCTCTCTCTCCCCGTCTTAGCCGCTGGCATTACAATGCTACTCACAGACCGTAACCTCAACACCACATTCTTTGACCCTGCCGGAGGCGGAGACCCAGTCCTATATCAACAT
>gi|197255689|gb|FJ027721.1|_Leptasthenura_aegithaloides_voucher_MACN-Or-ct_2693_cytochrome_oxidase_subunit_1_(COI)_gene_partial_cds_mitochondrial
CTTTATCTAATTTTCGGGGCATGAGCTGGAATAATCGGAACAGCTCTCAGCCTACTAATTCGAGCTGAACTTGGACAACCAGGTACCCTCCTAGGTGACGACCAAATTTATAATGTAATTGTCACCGCTCATGCTTTCGTAATAATCTTCTTTATAGTTATGCCCATTATAATTGGAGGCTTTGGCAACTGATTAGTCCCACTAATAATTGGTGCCCCAGACATAGCCTTCCCTCGAATAAACAATATAAGCTTCTGACTCCTACCCCCATCTTTTTTACTCCTACTAGCCTCCTCGACTGTAGAAGCCGGAGTAGGAACAGGATGAACAGTTTACCCCCCACTAGCAGGTAACTTAGCTCACGCTGGAGCCTCCGTCGACCTAGCCATCTTCTCTCTTCACCTCGCTGGTGTATCTTCCATTCTAGGAGCTATTAACTTTATCACAACCGCTATTAACATAAAACCACCAGCCCTCTCACAATATCAAACTCCACTATTCGTCTGATCCGTCCTCATCACCGCCGTCCTTCTCCTCCTCTCTCTCCCCGTCTTAGCCGCTGGCATTACAATGCTACTCACAGACCGTAACCTCAACACTACATTCTTTGACCCTGCTGGAGGCGGAGACCCAGTTCTATACCAACAT
>gi|197255685|gb|FJ027719.1|_Lepidocolaptes_angustirostris_voucher_MACN-Or-ct_1665_cytochrome_oxidase_subunit_1_(COI)_gene_partial_cds_mitochondrial
CTTTACCTAATCTTTGGAGCATGAGCCGGCATAATTGGCACCGCCCTAAGCCTCCTAATCCGAGCCGAACTTGGGCAACCAGGCACCCTCCTGGGCGACGACCAAATTTACAACGTTATCGTCACTGCCCATGCTTTCGTAATAATTTTCTTTATAGTTATACCCATTATAATCGGAGGATTTGGCAACTGACTAGTTCCACTAATAATTGGAGCCCCCGATATAGCATTTCCTCGAATAAACAACATAAGCTTCTGACTTCTTCCCCCATCCTTCCTACTTCTTCTAGCTTCCTCCACAGTAGAAGCAGGTGCAGGAACAGGATGAACAGTATACCCACCCCTAGCAGGTAATCTAGCCCACGCAGGAGCCTCAGTAGACCTAGCTATTTTTTCCCTTCACCTAGCCGGTGTATCTTCCATCCTAGGGGCCATCAACTTTATTACAACTGCAATCAACATAAAACCACCAGCTCTATCACAATATCAAACTCCCTTATTCGTCTGATCCGTCCTTATCACTGCTGTTCTTCTTCTTCTCTCCTTACCTGTTCTAGCTGCCGGCATCACAATATTACTCACAGATCGTAACCTAAATACCACATTCTTTGACCCAGCCGGAGGCGGAGACCCCATCCTATACCAACAC
>gi|197255681|gb|FJ027717.1|_Lepidocolaptes_angustirostris_voucher_MACN-Or-ct_2117_cytochrome_oxidase_subunit_1_(COI)_gene_partial_cds_mitochondrial
CTTTACNTAATCTTTGGAGCATGAGCCGGCATAATTGGCACCGCCCTAAGCCTCCTAATCCGAGCCGAACTTGGGCAACCAGGCACCCTCCTGGGCGACGACCAAATTTATAACGTTATCGTCACTGCCCATGCTTTCGTAATAATTTTCTTTATAGTTATACCCATTATAATCGGAGGATTTGGCAACTGACTAGTTCCACTAATAATTGGAGCCCCCGATATAGCATTTCCTCGAATAAACAACATAAGCTTCTGACTTCTTCCCCCATCCTTCCTACTTCTTCTAGCTTCCTCCACAGTAGAAGCAGGTGCAGGAACAGGATGAACAGTATACCCACCCCTAGCAGGTAATCTAGCCCACGCAGGAGCCTCAGTAGACCTAGCTATTTTTTCCCTTCACCTAGCCGGTGTATCTTCCATCCTAGGGGCCATCAACTTTATTACAACCGCAATCAACATAAAACCACCAGCTCTATCACAATATCAAACCCCCTTATTCGTCTGATCCGTCCTTATCACTGCTGTTCTTCTTCTTCTCTCCTTACCTGTTCTAGCTGCCGGCATCACAATATTACTCACAGATCGTAACCTAAATACCACATTCTTTGACCCAGCCGGAGGCGGAGACCCCATCCTATACCAACAC
>gi|197255677|gb|FJ027715.1|_Lepidocolaptes_angustirostris_voucher_MACN-Or-ct_3191_cytochrome_oxidase_subunit_1_(COI)_gene_partial_cds_mitochondrial
-------TAATCTTTGGAGCATGAGCCGGCATAATTGGCACCGCCCTAAGCCTCCTAATCCGAGCCGAACTTGGGCAACCAGGCACCCTCCTGGGCGACGACCAAATTTACAACGTTATCGTCACTGCCCATGCTTTCGTAATAATTTTCTTTATAGTTATACCCATTATAATTGGAGGATTTGGCAACTGACTAGTTCCACTAATAATTGGAGCCCCCGATATAGCATTTCCTCGAATAAACAACATAAGCTTCTGACTTCTTCCCCCATCCTTCCTACTTCTTCTAGCTTCCTCCACAGTAGAAGCAGGTGCAGGAACAGGATGAACAGTATACCCACCCCTAGCAGGTAATCTAGCCCACGCAGGAGCCTCAGTAGACCTAGCTATTTTTTCCCTTCACCTAGCCGGTGTATCTTCCATCCTAGGGGCCATCAACTTTATTACAACTGCAATCAACATAAAACCACCAGCTCTATCACAATATCAAACTCCCTTATTCGTCTGATCCGTCCTTATCACTGCTGTTCTTCTTCTTCTCTCCTTACCTGTTCTAGCTGCCGGCATCACAATATTACTCACAGATCGTAACCTAAATACCACATTCTTTGACCCAGCCGGAGGCGGAGACCCCATCCTATACCAACAC
>gi|197255673|gb|FJ027713.1|_Lepidocolaptes_angustirostris_voucher_MACN-Or-ct_1351_cytochrome_oxidase_subunit_1_(COI)_gene_partial_cds_mitochondrial
CTTTACCTAATCTTTGGAGCATGAGCCGGCATAATTGGCACCGCCCTAAGCCTCCTAATCCGAGCCGAACTTGGGCAACCAGGCACCCTCCTGGGCGACGACCAAATTTACAACGTTATCGTCACTGCCCATGCTTTCGTAATAATTTTCTTTATAGTTATACCCATTATAATCGGAGGATTTGGCAACTGACTAGTTCCACTAATAATTGGAGCCCCCGATATAGCATTTCCTCGAATAAACAACATAAGCTTCTGACTTCTTCCCCCATCCTTCCTACTTCTTCTAGCTTCCTCCACAGTAGAAGCAGGTGCAGGAACAGGATGAACAGTATACCCACCCCTAGCAGGTAATCTAGCCCACGCAGGAGCCTCAGTAGACCTAGCTATTTTTTCCCTTCACCTAGCCGGTGTATCTTCCATCCTAGGGGCCATCAACTTTATTACAACTGCAATCAACATAAAACCACCAGCTCTATCACAATATCAAACTCCCTTATTCGTCTGATCCGTCCTTATCACTGCTGTTCTTCTTCTTCTCTCCTTACCTGTTCTAGCTGCCGGCATCACAATATTACTCACAGATCGTAACCTAAATACCACATTCTTTGACCCAGCCGGAGGCGGAGACCCCATCCTATACCAACAC
>gi|197255669|gb|FJ027711.1|_Lathrotriccus_euleri_voucher_MACN-Or-ct_905_cytochrome_oxidase_subunit_1_(COI)_gene_partial_cds_mitochondrial
TTATATCTAATCTTCGGCGCTTGAGCCGGTATGATTGGTACAGCCCTAAGCCTCCTTATTCGAGCAGAACTCGGTCAACCAGGGACCCTTCTAGGAGATGACCAAATCTACAACGTTATTGTCACTGCTCATGCCTTCGTAATAATCTTCTTTATAGTAATGCCCATCATGATCGGAGGATTTGGCAACTGATTAGTCCCCTTGATAATTGGTGCCCCTGACATGGCATTCCCTCGAATAAACAATATAAGCTTTTGACTACTACCCCCTTCCTTCCTCCTTTTATTAGCCTCTTCCACAGTCGAAGCTGGAGCAGGAACCGGATGAACAGTCTACCCACCATTAGCCGGTAACCTAGCACATGCTGGAGCCTCAGTAGATTTAGCTATCTTTTCTCTCCACTTAGCAGGAGTTTCCTCAATCCTAGGTGCTATCAACTTCATCACCACCGCAATCAACATAAAACCACCAGCCCTATCACAGTACCAAACTCCCTTATTCGTTTGATCTGTCCTGATTACCGCAGTGCTTCTCCTCCTTTCCCTACCAGTTCTTGCAGCCGGAATTACTATATTATTGACAGATCGTAACCTTAACACTACATTCTTTGACCCTGCAGGAGGCGGAGACCCAGTCCTATATCAACAT
>gi|197255665|gb|FJ027709.1|_Leucophaeus_scoresbii_voucher_MACN-Or-ct_130_cytochrome_oxidase_subunit_1_(COI)_gene_partial_cds_mitochondrial
CTATACTTAATCTTCGGTGCATGAGCTGGCATAGTAGGTACTGCCCTCAGCCTACTTATTCGCGCAGAACTTGGCCAACCCGGAACCCTCCTAGGAGACGACCAAATCTACAACGTAATCGTCACCGCCCACGCCTTCGTAATAATCTTCTTCATAGTGATACCAATCATGATCGGTGGATTCGGAAACTGACTAGTTCCACTTATAATCGGTGCCCCTGACATAGCATTTCCACGCATAAACAACATAAGCTTCTGACTACTGCCCCCATCATTCCTACTCCTCCTAGCCTCTTCCACAGTAGAGGCTGGGGCCGGTACAGGATGAACAGTATACCCTCCTCTAGCTGGCAATCTAGCCCATGCTGGAGCCTCAGTAGACCTAGCAATCTTCTCTCTTCACCTAGCAGGTGTATCTTCCATTCTAGGCGCTATTAACTTCATCACTACAGCCATCAACATAAAACCCCCTGCCCTCTCACAATATCAAACCCCACTATTTGTGTGATCCGTACTCATCACTGCCGTCCTATTACTACTTTCACTCCCAGTGCTTGCCGCAGGCATTACCATGCTGCTCACAGACCGAAACCTAAACACAACATTCTTCGATCCCGCCGGAGGCGGTGACCCTGTACTATATCAACAC
>gi|197255661|gb|FJ027707.1|_Larus_dominicanus_voucher_MACN-Or-ct_1340_cytochrome_oxidase_subunit_1_(COI)_gene_partial_cds_mitochondrial
TTATACTTAATCTTTGGCGCATGAGCTGGCATAGTAGGTACTGCCCTCAGCCTGCTTATCCGTGCAGAACTTGGCCAACCCGGAACCCTCCTAGGAGACGACCAAATCTATAACGTAATTGTCACCGCCCATGCCTTCGTGATAATCTTCTTCATAGTGATACCAATCATGATCGGTGGGTTTGGAAACTGACTAGTCCCACTTATAATCGGTGCCCCTGATATAGCATTTCCACGCATAAACAACATAAGCTTCTGACTATTACCCCCATCATTCCTACTCCTCCTAGCCTCTTCCACAGTAGAAGCTGGAGCCGGCACAGGATGAACAGTATACCCCCCTCTAGCTGGCAATCTAGCCCATGCTGGAGCCTCAGTAGACCTAGCAATCTTCTCTCTTCACTTAGCAGGTGTGTCTTCCATTCTGGGTGCTATCAACTTTATCACTACAGCCATCAACATAAAACCCCCTGCCCTCTCACAATATCAAACCCCACTATTCGTATGATCCGTACTCATCACTGCCGTCCTATTACTACTTTCACTCCCAGTGCTTGCCGCAGGCATTACTATGCTACTTACAGACCGAAACCTAAACACAACATTCTTCGATCCCGCCGGAGGCGGTGACCCTGTACTATACCAACAC
>gi|197255657|gb|FJ027705.1|_Knipolegus_striaticeps_voucher_MACN-Or-ct_1577_cytochrome_oxidase_subunit_1_(COI)_gene_partial_cds_mitochondrial
CTATATCTAATTTTTGGCGCCTGGGCCGGAATGATTGGCACCGCCCTAAGCCTCCTTATTCGAGCAGAATTAGGACAACCAGGGACTCTCCTAGGAGACGATCAAATCTACAATGTAATCGTCACTGCTCATGCCTTCGTAATAATTTTCTTTATAGTAATGCCCATTATAATTGGAGGATTTGGTAACTGATTAGTCCCTCTAATAATTGGTGCCCCTGACATAGCATTCCCTCGTATAAACAACATAAGCTTCTGACTCCTACCCCCATCATTCCTTCTCCTTCTAGCCTCATCCACAGTTGAAGCCGGAGCAGGAACTGGATGAACCGTCTATCCACCACTTGCCGGTAATCTAGCACATGCCGGAGCTTCAGTAGACCTAGCTATCTTTTCTCTTCACCTTGCAGGTGTCTCCTCAATCCTAGGTGCTATCAACTTCATCACTACTGCAATTAATATAAAACCACCAGCCCTATCACAATACCAAACTCCCCTATTCGTGTGATCCGTCCTAATTACTGCAGTTCTTCTCCTCCTCTCTCTCCCAGTACTTGCCGCCGGTATCACTATGCTACTTACAGATCGCAACCTTAACACTACATTCTTTGACCCAGCAGGAGGTGGAGACCCAGTCTTATATCAACAT
>gi|197255653|gb|FJ027703.1|_Knipolegus_signatus_voucher_MACN-Or-ct_732_cytochrome_oxidase_subunit_1_(COI)_gene_partial_cds_mitochondrial
CTATATCTTATTTTTGGCGCCTGGGCCGGAATGATTGGCACAGCCCTAAGTCTCCTTATTCGAGCAGAGCTAGGACAACCAGGAACTCTCCTAGGAGATGACCAAATCTACAATGTAATCGTCACTGCCCATGCCTTCGTAATAATTTTCTTTATAGTAATGCCCATTATAATTGGAGGATTTGGCAACTGATTAGTCCCTCTAATAATTGGTGCCCCTGACATAGCATTCCCTCGCATAAACAACATAAGCTTCTGACTTCTACCCCCATCATTCCTTCTCCTTTTAGCCTCGTCCACAGTTGAAGCCGGAGCAGGAACTGGATGAACTGTCTATCCGCCACTAGCCGGTAATCTAGCACATGCCGGAGCTTCAGTAGACTTAGCCATCTTTTCTCTCCACCTTGCAGGTGTGTCCTCAATCCTAGGTGCTATCAACTTCATCACTACTGCAATTAATATAAAACCACCAGCTCTATCACAATATCAAACTCCCCTATTCGTATGATCCGTCCTAATTACTGCAGTTCTTCTCCTCCTCTCCCTCCCAGTACTTGCTGCTGGTATCACTATACTACTTACAGACCGCAACCTTAACACTACATTCTTTGACCCAGCAGGAGGTGGGGATCCTGTCTTATATCAACAT
>gi|197255649|gb|FJ027701.1|_Knipolegus_hudsoni_voucher_MACN-Or-ct_012_cytochrome_oxidase_subunit_1_(COI)_gene_partial_cds_mitochondrial
CTATATCTAATTTTTGGCGCCTGGGCCGGAATGATTGGCACCGCCCTAAGCCTCCTTATTCGAGCAGAACTAGGACAACCAGGAACTCTCCTAGGAGACGACCAAATCTACAATGTAATCGTCACTGCTCATGCCTTCGTAATAATTTTCTTTATAGTAATGCCCATTATAATTGGAGGATTTGGCAACTGGTTAGTCCCTCTAATAATTGGTGCCCCTGACATAGCATTCCCTCGTATAAACAACATAAGCTTCTGGCTTCTACCCCCATCATTCCTTCTCCTTCTAGCCTCATCCACAGTTGAAGCTGGAGCAGGAACTGGATGAACTGTCTATCCACCACTAGCCGGTAATCTAGCACATGCCGGAGCTTCAGTAGACTTAGCCATCTTTTCTCTTCACCTTGCAGGTGTCTCCTCAATCCTAGGTGCTATCAACTTCATCACTACTGCAATTAATATAAAACCACCAGCCCTATCACAATACCAAACGCCCCTATTCGTATGATCCGTCCTAATCACTGCAGTTCTTCTCCTCCTCTCCCTCCCTGTACTTGCTGCCGGTATCACTATGCTACTTACAGACCGCAATCTTAACACTACATTCTTTGACCCAGCAGGAGGCGGAGATCCAGTCTTATATCAACAT
>gi|197255645|gb|FJ027699.1|_Knipolegus_hudsoni_voucher_MACN-Or-ct_2760_cytochrome_oxidase_subunit_1_(COI)_gene_partial_cds_mitochondrial
CTATATCTAATTTTTGGCGCCTGGGCCGGAATGATTGGCACCGCCCTAAGCCTCCTTATTCGAGCAGAACTAGGACAACCAGGAACTCTCCTAGGAGACGACCAAATCTACAATGTAATCGTCACTGCTCATGCCTTCGTAATAATTTTCTTTATAGTAATGCCCATTATAATTGGAGGATTTGGCAACTGGTTAGTCCCTCTAATAATTGGTGCCCCTGACATAGCATTCCCTCGTATAAACAACATAAGCTTCTGGCTTCTACCCCCATCATTCCTTCTCCTTCTAGCCTCATCCACAGTTGAAGCTGGAGCAGGAACTGGATGAACTGTCTATCCACCACTAGCCGGTAATCTAGCACATGCCGGAGCTTCAGTAGACTTAGCCATCTTTTCTCTTCACCTTGCAGGTATCTCCTCAATCCTAGGTGCTATCAACTTCATCACTACTGCAATTAATATAAAACCACCAGCCCTATCACAATACCAAACGCCCCTATTCGTATGATCCGTCCTAATCACTGCAGTTCTTCTCCTCCTCTCCCTCCCTGTACTTGCTGCCGGTATCACTATGCTACTTACAGACCGCAATCTTAACACTACATTCTTTGACCCAGCAGGAGGCGGAGATCCAGTCTTATATCAACAT
>gi|197255641|gb|FJ027697.1|_Knipolegus_cyanirostris_voucher_MACN-Or-ct_1641_cytochrome_oxidase_subunit_1_(COI)_gene_partial_cds_mitochondrial
CTATATCTAATCTTTGGTGCCTGGGCCGGAATAATTGGCACCGCCCTAAGCCTCCTTATTCGAGCAGAATTAGGACAGCCAGGAACTCTCCTAGGAGACGATCAAATCTACAATGTAATCGTCACTGCTCATGCCTTCGTAATAATTTTCTTTATAGTAATGCCCATTATAATTGGGGGATTTGGCAACTGGTTAGTCCCTCTAATAATTGGCGCCCCTGACATAGCATTCCCTCGTATAAACAACATAAGCTTCTGACTTCTCCCCCCGTCATTCCTTCTCCTTCTAGCCTCGTCCACAGTTGAAGCTGGAGCAGGAACTGGGTGAACTGTCTATCCACCACTAGCCGGTAATCTAGCACATGCCGGAGCCTCAGTAGACTTAGCTATCTTTTCTCTCCACCTTGCAGGTGTCTCCTCAATCCTAGGTGCTATCAACTTCATCACTACCGCAATTAATATAAAACCACCAGCCCTATCCCAATACCAAACTCCCCTATTCGTATGATCCGTCCTAATTACTGCAGTTCTTCTCCTCCTCTCTCTTCCAGTACTTGCCGCCGGTATCACTATACTACTTACAGACCGCAACCTTAACACTACATTCTTTGACCCAGCAGGAGGTGGAGATCCAGTCCTATATCAGCAT
>gi|197255637|gb|FJ027695.1|_Knipolegus_aterrimus_voucher_MACN-Or-ct_826_cytochrome_oxidase_subunit_1_(COI)_gene_partial_cds_mitochondrial
-------------------------------------GCACCGCCCTAAGCCTCCTTATTCGAGCAGAACTAGGACAACCAGGAACTCTCCTAGGAGACGATCAAATCTACAATGTAATCGTCACTGCTCATGCATTCGTAATGATTTTCTTTATAGTAATGCCCATCATAATTGGAGGATTTGGCAACTGGTTAGTTCCTCTAATAATTGGTGCCCCTGACATAGCATTCCCTCGTATAAACAACATAAGCTTCTGACTTCTACCCCCATCATTCCTTCTCCTTCTAGCCTCATCCACAGTTGAAGCTGGAGCAGGAACTGGATGAACTGTCTATCCACCACTAGCCGGTAATCTAGCACATGCCGGAGCTTCAGTAGACTTAGCTATCTTTTCTCTTCACCTTGCAGGTGTCTCCTCAATCCTAGGTGCTATCAACTTCATCACTACTGCAATTAATATAAAACCACCAGCCCTATCACAATACCAAACTCCCTTATTCGTATGATCCGTCCTAATCACTGCAGTTCTTCTCCTCCTCTCTCTCCCAGTACTTGCCGCCGGTATCACTATACTACTTACAGACCGCAACCTTAACACCACATTCTTTGACCCAGCAGGAGGTGGAGATCCAGTCTTATATCAACAT
>gi|197255633|gb|FJ027693.1|_Knipolegus_aterrimus_voucher_MACN-Or-ct_1011_cytochrome_oxidase_subunit_1_(COI)_gene_partial_cds_mitochondrial
CTATATCTAATTTTTGGTGCCTGGGCCGGAATGATTGGCACCGCCCTAAGCCTCCTTATTCGAGCAGAACTAGGACAACCAGGAACTCTCCTAGGAGACGATCAAATCTACAATGTAATCGTCACTGCTCATGCATTCGTAATGATTTTCTTTATAGTAATGCCCATCATAATTGGAGGATTTGGCAACTGGTTAGTTCCTCTAATAATTGGTGCCCCTGACATAGCATTCCCTCGTATAAATAACATAAGCTTCTGACTTCTACCCCCATCATTCCTTCTCCTTCTAGCCTCATCCACAGTTGAAGCTGGAGCAGGAACTGGATGAACTGTCTATCCACCACTAGCCGGTAATCTAGCACATGCCGGAGCTTCAGTAGACTTAGCTATCTTTTCTCTTCACCTTGCAGGTGTCTCCTCAATCCTAGGTGCTATCAACTTCATCACTACTGCAATTAATATAAAACCACCAGCCCTATCACAATACCAAACTCCCTTATTCGTATGATCCGTCCTAATCACTGCAGTTCTTCTCCTCCTCTCTCTCCCAGTACTTGCCGCCGGTATCACTATACTACTTACAGACCGTAACCTTAACACCACATTCTTTGACCCAGCAGGAGGTGGAGATCCAGTCTTATATCAACAT
>gi|197255629|gb|FJ027691.1|_Knipolegus_aterrimus_voucher_MACN-Or-ct_824_cytochrome_oxidase_subunit_1_(COI)_gene_partial_cds_mitochondrial
CTATATCTAATTTTTGGCGCCTGGGCCGGAATGATTGGCACCGCCCTAAGCCTCCTTATTCGAGCAGAACTAGGACAACCAGGAACTCTCCTAGGAGACGATCAAATCTACAATGTAATCGTCACTGCTCATGCATTCGTAATGATTTTCTTTATAGTAATGCCCATTATAATTGGAGGATTTGGTAACTGATTAGTTCCTCTAATAATTGGAGCTCCTGACATAGCATTCCCTCGTATAAACAACATAAGCTTCTGACTTCTACCCCCATCATTCCTTCTCCTTCTAGCCTCATCCACAGTTGAAGCTGGAGCAGGAACTGGATGAACTGTCTATCCACCACTAGCCGGTAATCTAGCACATGCCGGAGCTTCAGTAGACTTAGCTATCTTTTCTCTTCACCTTGCAGGTGTCTCCTCAATCCTAGGTGCTATCAACTTCATCACCACTGCAATTAATATAAAACCACCAGCCCTATCACAATACCAAACTCCCTTATTCGTATGATCCGTCCTAATCACTGCAGTTCTTCTCCTCCTCTCTCTCCCAGTACTTGCCGCCGGTATCACTATACTACTTACAGACCGCAACCTTAACACTACATTCTTTGACCCAGCAGGAGGTGGAGATCCAGTCTTATACCAACAT
>gi|197255625|gb|FJ027689.1|_Knipolegus_aterrimus_voucher_MACN-Or-ct_1323_cytochrome_oxidase_subunit_1_(COI)_gene_partial_cds_mitochondrial
CTATATNTAATTTTTGGCGCNTGGGCCGGAATGATTGGCACCGCCCTAAGCCTCCTTATTCGAGCAGAACTAGGACAACCAGGAACTCTCCTAGGAGACGATCAAATCTACAATGTAATCGTCACTGCTCATGCATTCGTAATGATTTTCTTTATAGTAATGCCCATTATAATTGGAGGATTTGGTAACTGATTAGTTCCTCTAATAATTGGAGCTCCTGACATAGCATTCCCTCGTATAAACAACATAAGCTTCTGACTTCTACCCCCATCATTCCTTCTCCTTCTAGCCTCATCCACAGTTGAAGCTGGAGCAGGAACTGGATGAACTGTCTATCCACCACTAGCCGGTAATCTAGCACATGCCGGAGCTTCAGTAGACTTAGCTATCTTTTCTCTTCACCTTGCAGGTGTCTCCTCAATCCTAGGTGCTATCAACTTCATCACCACTGCAATTAATATAAAACCACCAGCCCTATCACAATACCAAACTCCCTTATTCGTATGATCCGTCCTAATCACTGCAGTTCTTCTCCTCCTCTCTCTCCCAGTACTTGCCGCCGGTATCACTATACTACTTACAGACCGCAACCTTAACACTACATTCTTTGACCCAGCAGGAGGTGGAGATCCAGTCTTATATCAACAT
>gi|197255621|gb|FJ027687.1|_Jacana_jacana_voucher_MACN-Or-ct_1455_cytochrome_oxidase_subunit_1_(COI)_gene_partial_cds_mitochondrial
TTATACTTAATTTTTGGTGCATGGGCCGGCATAGTTGGCACTGCCCTTAGCCTCCTCATCCGCGCAGAATTAGGGCAACCAGGAACATTACTGGGCGACGACCAGATCTACAATGTAATCGTTACTGCCCATGCCTTCGTAATAATCTTTTTCATAGTTATACCAATCATGATTGGGGGCTTTGGAAACTGATTAGTACCTCTTATAATTGGCGCCCCAGACATAGCATTCCCTCGCATGAACAACATAAGCTTCTGACTACTCCCCCCATCATTCCTCTTACTACTAGCCTCCTCAACAGTAGAAGCCGGAGCAGGTACAGGATGAACTGTCTACCCTCCCCTCGCCGGCAACCTAGCCCACGCAGGAGCCTCAGTTGACCTAGCCATCTTCTCACTCCACCTAGCAGGTGTCTCCTCAATCTTAGGAGCAATCAACTTCATTACAACCGCCATCAACATAAAACCACCCGCCCTCTCTCAATACCAAACCCCCCTCTTCGTATGATCAGTCCTAATCACTGCCGTCCTTCTACTACTCTCCTTACCAGTACTTGCCGCCGGCATCACCATATTACTAACAGACCGAAACCTCAACACCACCTTCTTTGACCCCGCTGGAGGAGGAGACCCCATCCTATACCAACAC
>gi|197255617|gb|FJ027685.1|_Ictinia_plumbea_voucher_MACN-Or-ct_2076_cytochrome_oxidase_subunit_1_(COI)_gene_partial_cds_mitochondrial
CTATACNTAATCTTCGGCGCCTGAGCTGGTATAGTCGGCACTGCCCTTAGCCTACTTATCCGTGCAGAACTCGGCCAACCAGGCACACTCCTAGGTGATGACCAAATCTATAATGTAATCGTCACCGCACATGCCTTCGTAATAATCTTCTTTATAGTTATACCGATCATGATCGGAGGATTCGGAAACTGACTTGTCCCACTCATAATTGGCGCCCCCGACATAGCCTTTCCACGCATAAACAACATAAGCTTCTGACTGCTACCTCCTTCTTTCCTCCTCTTACTAGCCTCCTCAACAGTAGAAGCAGGAGCTGGTACCGGATGAACTGTCTACCCCCCACTAGCTGGCAACATAGCCCACGCCGGAGCTTCAGTTGACCTGGCCATCTTCTCCCTACACCTAGCCGGAGTCTCATCCATCCTCGGAGCAATTAACTTTATCACAACTGCTATCAACATAAAACCTCCCGCCCTTTCCCAATACCAAACACCCCTATTCGTATGATCCGTCCTCATTACCGCCGTCCTTCTACTACTCTCACTGCCAGTACTAGCCGCTGGCATTACTATATTACTTACAGACCGAAACCTCAATACAACATTCTTCGACCCCGCTGGCGGAGGTGATCCCATCCTATACCAGCAC
>gi|197255613|gb|FJ027683.1|_Ictinia_plumbea_voucher_MACN-Or-ct_1766_cytochrome_oxidase_subunit_1_(COI)_gene_partial_cds_mitochondrial
CTATACCTAATCTTCGGCGCCTGAGCTGGTATAGTCGGCACTGCCCTTAGCCTACTTATCCGTGCAGAACTCGGCCAACCAGGCACACTCCTAGGTGATGACCAAATCTATAATGTAATCGTCACCGCACATGCCTTCGTAATAATCTTCTTTATAGTTATACCGATCATGATCGGAGGATTCGGAAACTGACTTGTCCCACTCATAATTGGCGCCCCCGACATAGCCTTTCCACGCATAAACAACATAAGCTTCTGACTGCTACCTCCTTCTTTCCTCCTCTTACTAGCCTCCTCAACAGTAGAAGCAGGAGCCGGTACCGGATGAACTGTCTACCCCCCACTAGCTGGCAACATAGCCCACGCCGGAGCTTCAGTTGACCTGGCCATCTTCTCCCTACACCTAGCCGGAGTCTCATCCATCCTCGGGGCAATTAACTTTATCACAACTGCTATCAACATAAAACCTCCCGCCCTTTCCCAATACCAAACACCCCTATTCGTATGATCCGTCCTCATTACCGCCGTCCTTCTACTACTCTCACTGCCAGTACTAGCCGCTGGCATTACTATATTACTTACAGACCGAAACCTCAATACAACATTCTTCGACCCCGCTGGCGGAGGTGATCCCATCCTATACCAGCAC
>gi|197255609|gb|FJ027681.1|_Ictinia_mississippiensis_voucher_MACN-Or-ct_2351_cytochrome_oxidase_subunit_1_(COI)_gene_partial_cds_mitochondrial
CTATACCTAATCTTCGGCGCCTGAGCTGGTATAGTCGGCACTGCCCTTAGCCTACTTATCCGTGCAGAACTTGGTCAACCAGGCACACTCCTAGGTGATGACCAAATCTATAATGTAATCGTCACCGCACATGCCTTCGTAATAATCTTCTTCATAGTTATACCAATCATGATCGGAGGATTCGGAAACTGACTTGTCCCACTCATAATTGGCGCTCCTGACATAGCCTTTCCACGCATAAACAACATAAGCTTCTGACTGCTACCTCCTTCCTTCCTTCTCTTACTAGCCTCCTCAACAGTAGAAGCAGGAGCTGGCACCGGATGAACTGTTTACCCTCCACTAGCTGGCAACATAGCCCACGCCGGAGCCTCAGTTGACCTAGCCATCTTCTCCCTACACCTAGCCGGAGTTTCATCCATCCTCGGAGCAATTAACTTCATCACAACTGCCATCAACATAAAACCCCCAGCCCTTTCCCAATACCAAACACCCCTATTCGTATGATCCGTCCTCATTACCGCCGTCCTTCTATTACTTTCACTGCCAGTACTAGCCGCCGGCATCACTATATTACTTACAGACCGAAACCTCAACACAACATTCTTCGACCCTGCCGGCGGGGGCGATCCTATCCTATACCAACAC
>gi|197255605|gb|FJ027679.1|_Icterus_cayanensis_voucher_MACN-Or-ct_2118_cytochrome_oxidase_subunit_1_(COI)_gene_partial_cds_mitochondrial
CTATACTTAATTTTCGGCGCATGAGCCGGAATAGTAGGTACCGCCCTAAGTCTCCTTATCCGAGCAGAACTAGGCCAACCTGGAGCCCTTCTAGGAGACGATCAAGTCTACAACGTAGTTGTTACGGCCCATGCTTTCGTAATAATCTTCTTCATAGTCATACCAATTATAATCGGAGGATTCGGCAACTGACTAGTCCCCCTAATAATCGGAGCCCCAGACATAGCATTCCCACGAATAAACAACATAAGCTTCTGACTACTTCCCCCATCCTTCCTCCTCCTCCTAGCATCCTCTACAATTGAAGCAGGCGTAGGCACAGGTTGAACAGTATACCCCCCACTAGCAGGCAACTTAGCCCATGCCGGAGCCTCAGTCGACCTTGCAATTTTCTCCCTACACCTAGCTGGTATCTCCTCAATCCTAGGGGCAATCAACTTCATTACAACCGCAATCAACATAAAACCCCCTGCTCTATCACAATACCAAACTCCCCTATTCGTATGATCAATCTTAATTACCGCAGTACTCCTACTCCTATCTCTCCCAGTTCTCGCCGCAGGAATTACAATACTTCTCACAGACCGCAACCTCAACACTACGTTCTTTGATCCTGCCGGAGGAGGAGACCCTGTACTATACCAACAT
>gi|197255601|gb|FJ027677.1|_Icterus_cayanensis_voucher_MACN-Or-ct_3175_cytochrome_oxidase_subunit_1_(COI)_gene_partial_cds_mitochondrial
CTATANTTAATTTTCGGCGCATGAGCCGGAATAGTAGGTACCGCCCTAAGTNTCCTTATCCGAGCAGAANTAGGCCAACCTGGAGCCCTTCTAGGAGACGATCAAGTCTACAACGTAGTTGTTACGGCCCATGCTTTCGTAATAATCTTCTTCATAGTCATACCAATTATAATCGGAGGATTCGGCAACTGACTAGTCCCCCTAATAATCGGAGCCCCAGACATAGCATTCCCACGAATAAACAACATAAGCTTCTGACTACTTCCCCCATCCTTCCTCCTCCTCCTAGCATCCTCTACAATTGAAGCAGGCGTAGGCACAGGTTGAACAGTATACCCCCCACTAGCAGGCAACTTAGCCCATGCCGGAGCCTCAGTCGACCTTGCAATTTTCTCCCTACACCTAGCTGGTATCTCCTCAATCCTAGGGGCAATCAACTTCATTACAACCGCAATCAACATAAAACCCCCTGCTCTATCACAATACCAAACTCCCCTATTCGTATGATCAGTCTTAATTACCGCAGTACTCCTACTCCTATCTCTCCCAGTTCTCGCCGCAGGAATTACAATACTTCTCACAGACCGCAACCTCAACACTACGTTCTTTGATCCTGCCGGAGGAGGAGACCCTGTACTATACCAACAT
>gi|197255597|gb|FJ027675.1|_Icterus_cayanensis_voucher_MACN-Or-ct_1483_cytochrome_oxidase_subunit_1_(COI)_gene_partial_cds_mitochondrial
CTATACTTAATTTTCGGCGCATGAGCCGGAATAGTAGGTACCGCCCTAAGTCTCCTTATCCGAGCAGAACTAGGCCAACCTGGAGCCCTTCTAGGAGACGATCAAGTCTACAACGTAGTTGTTACGGCCCATGCTTTCGTAATAATCTTCTTCATAGTCATACCAATTATAATCGGAGGATTCGGCAACTGACTAGTCCCCCTAATAATCGGAGCCCCAGACATAGCATTCCCACGAATAAACAACATAAGCTTCTGACTACTTCCCCCATCCTTCCTCCTCCTCCTAGCATCCTCTACAATTGAAGCAGGCGTAGGCACAGGTTGAACAGTATACCCCCCACTAGCAGGCAACTTAGCCCATGCCGGAGCCTCAGTCGACCTTGCAATTTTCTCCCTACACCTAGCTGGTATCTCCTCAATCCTAGGGGCAATCAACTTCATTACAACCGCAATCAACATAAAACCCCCTGCTCTATCACAATACCAAACTCCCCTATTCGTATGATCAGTCTTAATTACCGCAGTACTCCTACTCCTATCTCTCCCAGTTCTCGCCGCAGGAATTACAATACTTCTCACAGACCGCAACCTCAACACTACGTTCTTTGATCCTGCCGGAGGAGGAGACCCTGTACTATACCAACAT
>gi|197255593|gb|FJ027673.1|_Hymenops_perspicillatus_voucher_MACN-Or-ct_2179_cytochrome_oxidase_subunit_1_(COI)_gene_partial_cds_mitochondrial
CTGTACTTAATTTTTGGCGCCTGGGCCGGAATAATTGGTACCGCCTTAAGCCTCCTTATTCGAGCAGAACTAGGACAACCAGGAACTCTTCTAGGAGATGACCAGATCTATAATGTAATCGTCACCGCCCATGCCTTCGTAATAATCTTCTTTATAGTAATACCCATTATAATTGGAGGGTTTGGCAACTGACTGGTTCCCCTAATAATTGGTGCTCCCGACATAGCATTCCCCCGCATAAACAATATAAGCTTCTGGCTATTACCCCCATCATTTCTTCTCCTTTTAGCCTCATCCACAGTCGAAGCTGGAGCAGGAACTGGATGAACTGTATATCCTCCACTAGCCGGTAACCTAGCACATGCCGGAGCTTCAGTAGACCTAGCCATCTTCTCCCTTCATCTCGCAGGAGTTTCTTCAATTCTAGGTGCTATCAACTTCATCACCACTGCAATTAACATGAAACCCCCAGCCCTCTCACAATACCAAACTCCCCTATTCGTCTGATCCGTATTAATTACCGCAGTTCTCCTCCTCCTGTCCCTCCCAGTACTCGCTGCCGGTATCACCATACTACTTACAGATCGCAACCTTAACACTACATTCTTCGACCCTGCAGGAGGAGGAGACCCAGTCCTGTATCAACAC
>gi|197255589|gb|FJ027671.1|_Hymenops_perspicillatus_voucher_MACN-Or-ct_2142_cytochrome_oxidase_subunit_1_(COI)_gene_partial_cds_mitochondrial
CTGTACTTAATTTTTGGCGCNTGGGCCGGAATAATTGGTACCGCCTTAAGCCTCCTTATTCGAGCAGAACTAGGACAACCAGGAACTCTTCTAGGAGATGACCAGATCTATAATGTAATCGTCACCGCCCATGCCTTCGTAATAATCTTCTTTATAGTAATACCCATTATAATTGGAGGGTTTGGCAACTGACTGGTTCCCCTAATAATTGGTGCTCCCGACATAGCATTCCCCCGCATAAACAATATAAGCTTCTGGCTATTACCCCCATCATTTCTTCTCCTTTTAGCCTCATCCACAGTCGAAGCTGGAGCAGGAACTGGATGAACTGTATATCCTCCACTAGCCGGTAACCTAGCACATGCCGGAGCTTCAGTAGACCTAGCCATCTTCTCCCTTCATCTCGCAGGAGTTTCTTCAATTCTAGGTGCTATCAACTTCATCACCACTGCAATTAACATGAAACCCCCAGCCCTCTCACAATACCAAACTCCCCTATTCGTCTGATCCGTATTAATTACCGCAGTTCTCCTCCTCCTGTCCCTCCCAGTACTCGCTGCCGGTATCACCATACTACTTACAGATCGCAACCTTAACACTACATTCTTCGACCCTGCAGGAGGAGGAGACCCAGTCCTGTATCAACAC
>gi|197255585|gb|FJ027669.1|_Hymenops_perspicillatus_voucher_MACN-Or-ct_673_cytochrome_oxidase_subunit_1_(COI)_gene_partial_cds_mitochondrial
CTGTACTTAATTTTTGGCGCCTGGGCCGGAATAATTGGTACCGCCTTAAGCCTCCTTATTCGAGCAGAACTAGGACAACCAGGAACTCTTCTAGGAGATGACCAGATCTATAATGTAATCGTCACCGCCCATGCCTTCGTAATAATCTTCTTTATAGTAATACCCATTATAATTGGAGGGTTTGGCAACTGACTGGTTCCCCTAATAATTGGTGCTCCCGACATAGCATTCCCCCGCATAAACAATATAAGCTTCTGGCTATTACCCCCATCATTTCTTCTCCTTTTAGCCTCATCCACAGTCGAAGCTGGAGCAGGAACTGGATGAACTGTATATCCTCCACTAGCCGGTAACCTAGCACATGCCGGAGCTTCAGTAGACCTAGCCATCTTCTCCCTTCATCTCGCAGGAGTTTCTTCAATTCTAGGTGCTATCAACTTCATCACCACTGCAATTAACATGAAACCCCCAGCCCTCTCACAATACCAAACTCCCCTATTCGTCTGATCCGTATTAATTACCGCAGTTCTCCTCCTCCTGTCCCTCCCAGTACTCGCTGCCGGTATCACCATACTACTTACAGATCGCAACCTTAACACTACATTCTTCGACCCTGCAGGAGGAGGAGACCCAGTCCTGTATCAACAC
>gi|197255581|gb|FJ027667.1|_Hymenops_perspicillatus_voucher_MACN-Or-ct_625_cytochrome_oxidase_subunit_1_(COI)_gene_partial_cds_mitochondrial
CTGTACTTAATTTTTGGCGCCTGAGCCGGAATAATTGGTACCGCCTTAAGCCTCCTTATTCGAGCAGAACTAGGACAACCAGGAACTCTTCTAGGAGATGACCAGATCTATAATGTAATCGTCACCGCCCATGCCTTCGTAATAATCTTCTTTATAGTAATACCCATTATAATTGGAGGGTTTGGCAACTGACTGGTTCCCCTAATAATTGGTGCTCCCGACATAGCATTCCCCCGCATAAACAATATAAGCTTCTGGCTATTACCCCCATCATTTCTTCTCCTTTTAGCCTCATCCACAGTCGAAGCTGGAGCAGGAACTGGATGAACTGTATATCCTCCACTAGCCGGTAACCTAGCACATGCCGGAGCTTCAGTAGACCTAGCCATCTTCTCCCTTCATCTCGCAGGAGTTTCTTCAATTCTAGGTGCTATCAACTTCATCACCACTGCAATTAACATGAAACCCCCAGCCCTCTCACAATACCAAACTCCCCTATTCGTCTGATCCGTATTAATTACCGCAGTTCTCCTCCTCCTGTCCCTCCCAGTACTCGCTGCCGGTATCACCATACTACTTACAGATCGCAACCTTAACACTACATTCTTCGACCCTGCAGGAGGAGGAGACCCAGTCCTGTATCAACAC
>gi|197255577|gb|FJ027665.1|_Hylocharis_chrysura_voucher_MACN-Or-ct_1874_cytochrome_oxidase_subunit_1_(COI)_gene_partial_cds_mitochondrial
CTGTACCTAGTNTTCGGAGCATGAGCAGGAATAGTTGGAACCGCCCTCAGCCTGCTAATTCGAGCAGAACTCGGCCAACCGGGCACCTTACTGGGAGACGACCAAATCTATAATGTAATCGTCACCGCCCATGCCTTCGTAATAATTTTCTTCATAGTCATGCCAATTATGATCGGGGGCTTTGGAAATTGACTAATCCCCCTAATAATTGGAGCACCCGACATAGCGTTTCCACGTATAAACAACATAAGCTTTTGACTCCTGCCACCATCATTTCTCCTCCTTCTCGCCTCCTCCACCGTAGAAGCAGGTGCGGGCACAGGGTGAACCGTCTACCCCCCACTAGCTGGCAACCTAGCTCATGCAGGGGCATCAGTAGACCTAGCAATCTTCTCCCTACATCTATCTGGCATCTCATCAATCCTAGGAGCAATCAACTTTATTACCACTGCAATCAACATAAAACCTCCTGCCCTATCACAATACCAAACTCCCCTGTTCGTCTGATCAGTCCTCATCACTGCCGTCTTACTACTCCTCTCACTCCCAGTGCTTGCTGCCGGAATTACCATACTACTCACAGATCGAAACCTAAATACTACATTCTTTGACCCCGCTGGAGGAGGAGACCCCATCCTCTACC-----
>gi|197255573|gb|FJ027663.1|_Hylocharis_chrysura_voucher_MACN-Or-ct_1361_cytochrome_oxidase_subunit_1_(COI)_gene_partial_cds_mitochondrial
CTGTACCTAGTCTTCGGAGCATGAGCAGGAATAGTTGGAACCGCCCTCAGCCTGCTAATTCGAGCAGAACTCGGCCAACCGGGCACCTTACTGGGAGACGACCAAATCTATAATGTAATCGTCACCGCCCATGCCTTCGTAATAATTTTCTTCATAGTCATGCCAATTATGATCGGGGGCTTTGGAAATTGACTAATCCCCCTAATAATTGGAGCACCCGACATAGCGTTTCCACGTATAAACAACATAAGCTTTTGACTCCTGCCACCATCATTTCTCCTCCTTCTCGCCTCCTCCACCGTAGAAGCAGGTGCGGGCACAGGGTGAACCGTCTACCCCCCACTAGCTGGCAACCTAGCTCATGCAGGGGCATCAGTAGACCTAGCAATCTTCTCCCTACATCTATCTGGCATCTCATCAATCCTAGGAGCAATCAACTTTATTACCACTGCAATCAACATAAAACCTCCTGCCCTATCACAATACCAAACTCCCCTGTTCGTCTGATCAGTCCTCATCACTGCCGTCTTACTACTCCTCTCACTCCCAGTGCTTGCTGCCGGAATTACCATACTACTCACAGATCGAAACCTAAATACTACATTCTTTGACCCCGCTGGAGGAGGAGACCCCATCCTCTACCAACAC
>gi|197255569|gb|FJ027661.1|_Hylocharis_chrysura_voucher_MACN-Or-ct_2854_cytochrome_oxidase_subunit_1_(COI)_gene_partial_cds_mitochondrial
CTGTACCTAGTCTTCGGAGCATGAGCAGGAATAGTTGGAACCGCCCTCAGCCTGCTAATTCGAGCAGAACTCGGCCAACCGGGCACCTTACTGGGAGACGACCAAATCTATAATGTAATCGTCACCGCCCATGCCTTCGTAATAATTTTCTTCATAGTCATGCCAATTATGATCGGGGGCTTTGGAAATTGACTAATCCCCCTAATAATTGGAGCACCCGACATAGCGTTTCCACGTATAAACAACATAAGCTTTTGACTCCTGCCACCATCATTTCTCCTCCTTCTCGCCTCCTCCACCGTAGAAGCAGGTGCGGGCACAGGGTGAACCGTCTACCCCCCACTAGCTGGCAACCTAGCTCATGCAGGGGCATCAGTAGACCTAGCAATCTTCTCCCTACATCTATCTGGCATCTCATCAATCCTAGGAGCAATCAACTTTATTACCACTGCAATCAACATAAAACCTCCTGCCCTATCACAATACCAAACTCCCCTGTTCGTCTGATCAGTCCTCATCACTGCCGTCTTACTACTCCTCTCACTCCCAGTGCTTGCTGCCGGAATTACCATACTACTCACAGATCGAAACCTAAATACTACATTCTTTGACCCCGCTGGAGGAGGAGACCCCATCCTCTACCAACAC
>gi|197255565|gb|FJ027659.1|_Hydropsalis_torquata_voucher_MACN-Or-ct_1922_cytochrome_oxidase_subunit_1_(COI)_gene_partial_cds_mitochondrial
CTCTACCTAATTTTTGGTGCATGAGCTGGCATAGTAGGAACCGCCCTAAGCCTGCTCATCCGCGCTGAACTAGGCCAACCAGGAACTCTCNTAGGAGATNACCAAATTTACAANGTAATTGTTACAGCCCATGCCTTTGTAATAATTTTCTTTATAGTAATACCAATCATAATTGGAGGATTTGGCAACTGACTGGTCCCGCTAATAATTGGAGCCCCTGACATAGCCTTCCCTCGCATAAACAACATAAGCTTCTGACTATTACCACCATCCTTTCTTCTCCTACTAGCCTCATCCACAGTAGAAGCAGGGGCTGGCACAGGATGAACTGTATACCCCCCACTAGCTGGAAACCTAGCCCATGCCGGAGCCTCAGTAGACCTGGCCATCTTCTCCCTACACCTAGCAGGAGTGTCGTCTATCCTAGGTGCAATCAATTTTATTACAACTGCCATCAACATAAAACCACCCGCCCTCTCACAATACCAAACTCCACTATTTGTATGATCCGTTCTAATCACCGCCGTACTACTACTCCTCTCTCTCCCAGTTTTAGCCGCAGGCATCACTATGCTCCTAACAGACCGCAACCTAAATACCACATTCTTCGACCCTGCTGGAGGCGGAGATCCAGTGCTATACCAACAC
>gi|197255561|gb|FJ027657.1|_Hydropsalis_torquata_voucher_MACN-Or-ct_1600_cytochrome_oxidase_subunit_1_(COI)_gene_partial_cds_mitochondrial
CTCTACCTAATTTTTGGTGCATGAGCTGGCATAGTAGGAACCGCCCTAAGCCTGCTCATCCGCGCTGAACTAGGCCAACCAGGAACTCTCCTAGGAGATGACCAAATTTACAACGTAATTGTTACAGCCCATGCCTTTGTAATAATTTTCTTTATAGTAATACCAATCATAATTGGAGGATTTGGCAACTGACTGGTCCCGCTAATAATTGGAGCCCCTGACATAGCCTTCCCTCGCATAAACAACATAAGCTTCTGACTATTACCACCATCCTTTCTTCTCCTACTAGCCTCATCCACAGTAGAAGCAGGGGCTGGCACAGGATGAACTGTATACCCCCCACTAGCTGGAAACCTAGCCCATGCCGGAGCCTCAGTAGACCTGGCCATCTTCTCCCTACACCTAGCAGGAGTGTCGTCTATCCTAGGTGCAATCAATTTTATTACAACTGCCATCAACATAAAACCACCCGCCCTCTCACAATACCAAACTCCACTATTTGTATGATCCGTTCTAATCACCGCCGTACTACTACTCCTCTCTCTCCCAGTTTTAGCCGCAGGCATCACTATGCTCCTAACAGACCGCAACCTAAATACCACATTCTTCGACCCTGCTGGAGGCGGAGATCCAGTGCTATACCAACAC
>gi|197255557|gb|FJ027655.1|_Hirundo_rustica_voucher_MACN-Or-ct_1845_cytochrome_oxidase_subunit_1_(COI)_gene_partial_cds_mitochondrial
--------------------------------------------------TCTCCTAATCCGAGCAGAATTAGGCCAACCCGGCGCCCTACTCGGAGATGACCAAATCTACAATGTGGTAGTTACAGCCCACGCTTTCGTAATAATCTTCTTCATAGTTATGCCAATTATGATCGGAGGATTCGGAAACTGACTAGTTCNNNNAATAATCGGCGCCCCCGACATAGCATTCCCACGAATGAACAACATAAGCTTCTGACTACTTCCCCCATCATTCCTTCTCCTCCTAGCCTCATCCACGGTAGAAGCAGGAGTAGGTACTGGATGGACCGTATACCCGCCCCTAGCCGGAAACCTAGCACACGCAGGGGCCTCTGTAGACCTGGCCATTTTCTCCCTACATCTAGCAGGAATTTCCTCAATCCTAGGTGCAATTAACTTTATCACTACAGCAATCAACATAAAACCCCCAGCTCTATCGCAGTACCAAACACCACTATTCGTTTGATCAGTATTAATCACCGCAGTTCTTCTTCTCCTGTCATTACCCGTACTAGCCGCTGGCATCACAATGCTACTTACAGACCGCAACCTAAACACTACCTTCTTCGATCCGGCTGGAGGAGGAGACCCAGTACTTTACCAACAC
>gi|197255553|gb|FJ027653.1|_Hirundo_rustica_voucher_MACN-Or-ct_1844_cytochrome_oxidase_subunit_1_(COI)_gene_partial_cds_mitochondrial
CTATACTTAATCTTCGGCGCNTGAGCCGGCATGGTAGGTACCTCCCTCAGTCTCCTAATCCGAGCAGAATTAGGCCAACCCGGCGCCCTACTCGGAGATGACCAAATCTACAATGTGGTAGTTACAGCCCACGCTTTCGTAATAATCTTCTTCATAGTTATGCCAATTATGATCGGAGGATTCGGAAACTGACTAGTTCCCCTAATAATCGGCGCCCCCGACATAGCATTCCCACGAATGAACAACATAAGCTTCTGACTACTTCCCCCATCATTCCTTCTCCTCCTAGCCTCATCCACGGTAGAAGCAGGAGTAGGTACTGGATGGACCGTATACCCGCCCCTAGCCGGAAACCTAGCACACGCAGGGGCCTCTGTAGACCTGGCCATTTTCTCCCTACATCTAGCAGGAATTTCCTCAATCCTAGGTGCAATTAACTTTATCACTACAGCAATCAACATAAAACCCCCAGCTCTATCGCAGTACCAAACACCACTATTCGTTTGATCAGTATTAATCACCGCAGTTCTTCTTCTCCTGTCATTACCCGTACTAGCCGCTGGCATCACAATGCTACTTACAGACCGCAACCTAAACACTACCTTCTTCGATCCGGCTGGAGGAGGAGACCCAGTACTTTACCAACAC
>gi|197255549|gb|FJ027651.1|_Himantopus_himantopus_melanurus_voucher_MACN-Or-ct_1580_cytochrome_oxidase_subunit_1_(COI)_gene_partial_cds_mitochondrial
CTATACCTAATCTTCGGCGCATGAGCCGGTATAGTTGGTACCGCCCTTAGCTTACTCATCCGTGCAGAACTAGGCCAACCAGGGACCCTACTAGGAGATGACCAAATCTACAATGTAATCGTCACTGCCCATGCCTTCGTAATGATCTTCTTCATGGTCATACCAATTATGATCGGCGGATTCGGAAACTGACTAGTACCACTCATAATTGGTGCTCCCGACATAGCATTCCCCCGCATAAACAACATAAGCTTCTGACTACTACCACCATCATTCCTACTCCTCCTCGCCTCCTCTACAGTAGAAGCAGGAGCAGGAACAGGATGAACTGTATATCCCCCCTTAGCTGGTAATTTAGCCCACGCCGGAGCTTCAGTAGACCTAGCCATCTTCTCCCTCCACTTAGCAGGTGTATCCTCTATCCTGGGCGCAATCAACTTCATCACAACTGCTATCAACATAAAACCACCCGCCCTTTCACAATACCAAACCCCTCTATTCGTTTGATCTGTCCTCATCACCGCCGTCTTATTACTCCTATCACTCCCAGTCCTAGCCGCTGGCATTACCATACTACTGACAGACCGAAACCTAAACACCACATTCTTTGACCCCGCTGGAGGAGGTGACCCAGTCCTATACCAACAC
>gi|197255545|gb|FJ027649.1|_Heteronetta_atricapilla_voucher_MACN-Or-ct_2228_cytochrome_oxidase_subunit_1_(COI)_gene_partial_cds_mitochondrial
-TATACTNTATATTCGGAGCATGAGCAGGAATAATCGGCACCGCACTCAGCCTACTAATCCGAGCAGAACTAGGCCAACCGGGAACCCTCCTGGGAGACGACCAGATTTATAATGTAATCGTCACTGCCCATGCTTTCGTAATAATCTTCTTCATGGTCATGCCCATCATGATTGGAGGATTTGGCAACTGACTAGTCCCCCTCATAATCGGCGCCCCCGACATGGCATTTCCACGAATGAATAACATAAGCTTCTGATTACTACCGCCATCATTCCTCCTACTATTAGCCTCATCCACCGTAGAGGCTGGCGCCGGCACAGGCTGAACCGTATACCCACCCTTAGCAGGCAACCTAGCCCACGCCGGAGCTTCAGTAGACCTAGCCATCTTTTCACTACACCTAGCTGGTGTCTCCTCTATCCTAGGAGCCATTAACTTCATTACCACAGCCATCAACATAAAACCCCCCGCACTCTCACAGTACCAAACCCCACTATTCGTCTGATCCGTCCTAATTACTGCCATCCTACTCCTCCTTTCACTCCCCGTACTAGCTGCCGGCATTACAATGCTACTAACTGACCGAAACCTGAACACCACATTCTTCGACCCCGCAGGAGGAGGAGACCCAATTCTGTACCAACAC
>gi|197255541|gb|FJ027647.1|_Hemitriccus_margaritaceiventer_voucher_MACN-Or-ct_3150_cytochrome_oxidase_subunit_1_(COI)_gene_partial_cds_mitochondrial
-------TAATTTTTGGTGCCTGAGCTGGCATAATTGGCACTGCTCTTAGCCTCCTCATCCGGGCAGAACTCGGTCAACCAGGGACCTTCCTAGGAGACGACCAAATTTATAATGTAATCGTCACTGCCCATGCATTCGTAATAATTTTCTTTATAGTAATGCCCATCATAATTGGGGGGTTCGGCAACTGATTAGTCCCCTTAATAATTGGCGCACCTGACATAGCATTTCCACGTATAAACAACATAAGCTTCTGACTCCTTCCCCCCTCTTTCCTCCTCCTCCTAGCCTCATCTACAGTAGAAGCCGGAGTCGGAACCGGATGAACCGTATACCCACCCCTGGCTGGTAACCTAGCCCACGCCGGACCTTCAGTAGACTTAGCTATTTTCTCCCTTCACCTAGCAGGTGTATCCTCTATTCTAGGCGCTATCAACTTCATTACTACCGCAATTAACATAAAACCACCTGCCCTCTCACAATATCAAACCCCTTTATTCGTATGATCCGTCCTAATCACAGCAGTCCTTCTACTTCTTTCCCTACCAGTCCTTGCTGCAGGCATTACCATACTCTTAACAGACCGTAATCTGAACACCACATTTTTTGATCCTGCAGGAGGCGGAGACCCGATTTTATATCAACAC
>gi|197255537|gb|FJ027645.1|_Hemitriccus_margaritaceiventer_voucher_MACN-Or-ct_1405_cytochrome_oxidase_subunit_1_(COI)_gene_partial_cds_mitochondrial
CTTTACCTAATTTTTGGTGCCTGAGCTGGCATAATTGGCACTGCTCTTAGCCTCCTCATCCGGGCAGAACTCGGCCAACCAGGGACCCTCCTAGGAGACGACCAAATTTATAATGTAATCGTCACTGCCCATGCATTCGTAATAATTTTCTTTATAGTAATGCCCATCATAATTGGGGGATTCGGCAACTGATTAGTCCCCTTAATAATTGGCGCACCTGACATAGCATTTCCACGTATAAACAACATAAGCTTCTGACTCCTTCCCCCCTCTTTCCTCCTCCTCCTAGCCTCATCCACAGTAGAAGCCGGAGTCGGAACCGGATGAACCGTATACCCACCCCTGGCTGGTAACCTAGCCCACGCCGGACCTTCAGTAGACTTAGCTATTTTCTCCCTTCACCTAGCAGGTGTATCCTCTATTCTAGGCGCTATCAACTTCATTACTACCGCAATTAACATAAAACCACCTGCCCTCTCACAATATCAAACCCCTTTATTCGTATGATCCGTCCTAATCACAGCAGTCCTTCTACTTCTTTCCCTACCAGTCCTTGCTGCAGGCATTACCATACTCTTAACAGACCGTAATCTGAACACCACATTTTTTGATCCTGCAGGAGGCGGAGACCCGATTTTATATCAACAC
>gi|197255533|gb|FJ027643.1|_Hemitriccus_diops_voucher_MACN-Or-ct_2039_cytochrome_oxidase_subunit_1_(COI)_gene_partial_cds_mitochondrial
CTTTACCTAATTTTTGGCGCNTGAGCTGGCATAATCGGTACTGCCCTTAGCCTCCTCATCCGGGCAGAACTTGGTCAACCAGGAACCCTCCTAGGGGATGACCAAATTTACAACGTAATCGTTACTGCCCATGCATTTGTAATAATTTTCTTTATAGTAATACCCATCATGATCGGGGGATTTGGCAACTGACTAGTCCCCTTAATAATTGGTGCACCCGACATAGCATTTCCACGTATGAACAACATAAGCTTTTGACTCCTTCCCCCCTCCTTCCTCCTCCTCCTAGCCTCATCCACAGTAGAAGCTGGGGTCGGAACCGGATGAACCGTATACCCACCCTTAGCCGGTAACCTAGCCCACGCTGGACCTTCAGTAGACTTAGCTATTTTCTCTTTACATCTGGCAGGTGTATCTTCCATTCTAGGGGCTATTAACTTCATCACTACAGCAATTAACATAAAACCGCCCGCTCTCTCACAATACCAGACCCCCTTATTCGTCTGATCTGTCCTAATTACAGCAGTTCTTCTCCTCCTCTCCCTCCCAGTTCTTGCCGCAGGTATTACCATACTCCTAACGGACCGTAACCTGAACACCACATTTTTTGACCCTGCAGGAGGTGGAGACCCAATTTTATACCAGCAC
>gi|197255529|gb|FJ027641.1|_Haematopus_leucopodus_voucher_MACN-Or-ct_136_cytochrome_oxidase_subunit_1_(COI)_gene_partial_cds_mitochondrial
------------------------------------------------------------------------------------------CTAGGAGANNATCAAATTTACAATGTAATCGTCACAGCCCATGCCTTTGTAATAATCTTCTTCATAGTCATACCAATTATGATCGGCGGATTCGGAAATTGATTAGTCCCACTCATAATCGGTGCTCCCGACATAGCATTCCCTCGCATAAACAACATAAGCTTTTGGCTACTACCCCCATCATTCCTACTCCTCCTTGCCTCCTCTACAGTAGAAGCAGGAGCAGGCACAGGATGAACCGTATATCCCCCCCTAGCTGGCAACCTTGCCCACGCTGGAGCTTCAGTAGATCTGGCAATCTTCTCCCTCCACCTAGCAGGCGTATCCTCTATCTTAGGTGCAATCAATTTTATCACAACTGCCATCAACATAAAACCACCCGCCCTCTCACAATACCAAACTCCCCTATTTGTATGATCCGTACTCATCACCGCTGTCCTACTACTCCTATCCCTGCCAGTTCTCGCTGCCGGCATCACAATACTACTGACAGACCGAAACCTAAACACTACATTCTTCGATCCCGCTGGAGGTGGCGATCCAGTCCTATACCAACAC
>gi|197255525|gb|FJ027639.1|_Habia_rubica_voucher_MACN-Or-ct_2977_cytochrome_oxidase_subunit_1_(COI)_gene_partial_cds_mitochondrial
CTGTACCTAATCTTCGGCGCATGAGCCGGAATAGTAGGTACTGCCCTGAGCCTCCTCATCCGAGCAGAACTAGGTCAACCTGGAGCCCTCCTGGGAGACGACCAAGTCTACAACGTAGTCGTCACTGCCCATGCTTTCGTAATAATTTTCTTCATAGTTATGCCAATTATAATCGGCGGATTTGGAAACTGACTAGTCCCCCTAATAATTGGAGCCCCAGACATAGCATTCCCACGAATAAACAACATGAGCTTCTGACTACTACCCCCCTCCTTCCTCTTACTCCTAGCTTCTTCTACAGTTGAAGCAGGCGCCGGCACAGGCTGAACAGTATACCCACCACTGGCCGGTAACCTAGCTCACGCAGGAGCCTCAGTTGATCTGGCAATTTTCTCCCTACACCTGGCCGGTATCTCTTCAATCCTAGGAGCCATCAACTTTATCACAACAGCAGTCAACATAAAACCCCCTGCCCTATCACAATACCAAACCCCCCTGTTCGTTTGATCCGTCCTAATCACTGCAGTCCTCCTACTTCTATCTCTTCCAGTGTTAGCTGCAGGAATCACAATACTCCTAACGGACCGTAACCTCAACACTACATTCTTTGACCCTGCCGGAGGAGGAGATCCCGTCCTATACCAACAT
>gi|197255521|gb|FJ027637.1|_Guira_guira_voucher_MACN-Or-ct_2145_cytochrome_oxidase_subunit_1_(COI)_gene_partial_cds_mitochondrial
CTATATNTAATCTTTGGTGCNTGAGCTGGCATAATCGGAACATCCCTTAGCCTACTTATCCGCGCAGAACTAGGCCAACCAGGGACCCTTTTAGGAGACGACCAAATCTACAATGTAATCGTCACGGCACATGCCTTTGTAATAATCTTCTTTATAGTCATGCCCATTATAATCGGAGGATTCGGAAACTGACTGGTTCCCCTTATAATTGGTGCACCAGACATGGCATTTCCGCGCATAAATAACATAAGCTTCTGACTCCTTCCCCCATCCTTCCTATTACTACTAGCCTCTTCCACAGTGGAGGCCGGAGCAGGAACAGGATGAACAGTATACCCCCCACTAGCTGGAAACCTTGCCCATGCCGGAGCCTCAGTAGACCTAGCCATCTTCTCCCTCCACCTGGCCGGTGTATCCTCAATCCTAGGAGCAATCAACTTCATTACAACTGCTATCAACATAAAACCCCCAGTCCTTTCACAGTACCAAACCCGCTTGTTCGTCTGATCCGTCCTAATCACTGCCGTCCTACTACTTCTATCCCTACCAGTACTCGCTGCAGGTATTACTATGCTACTAACTGATCGTAATCTAAACACCACATTCTTCGACCCAGCCGGAGGCGGAGACCCCGTACTATATCAACAT
>gi|197255517|gb|FJ027635.1|_Grallaria_albigula_voucher_MACN-Or-ct_910_cytochrome_oxidase_subunit_1_(COI)_gene_partial_cds_mitochondrial
CTCTATTTAATCTTTGGCGCATGAGCCGGCATAATCGGAACCGCCTTAAGTCTTCTCATCCGAGCCGAACTTGGCCAACCAGGCACTCTCCTAGGCGACGACCAAATCTATAATGTAATCGTCACTGCCCATGCCTTTGTTATAATTTTCTTCATAGTCATACCCATTATAATTGGAGGATTCGGCAACTGGCTAGTCCCCCTAATAATTGGAGCCCCAGACATAGCCTTCCCACGAATAAATAATATAAGCTTCTGATTACTACCACCATCCTTCCTGCTCCTTCTAGCATCCTCCACAGTAGAAGCTGGAGCAGGAACAGGATGGACAGTTTACCCCCCACTAGCCGGTAACTTAGCACATGCCGGAGCATCAGTAGACCTAGCCATTTTTTCATTACATCTAGCAGGTGTATCCTCCATCCTAGGCGCTATCAACTTTATTACAACAGCAATCAACATGAAACCACCCACATTATCACAATATCAAACCCCTCTTTTCGTATGATCTGTTCTCATTACAGCGGTCCTCCTTCTTCTGTCCCTTCCAGTCCTAGCCGCAGGCATCACCATACTACTCACAGATCGTAATCTAAACACTACATTCTTCGACCCGGCCGGAGGCGGAGACCCAGTCCTCTACCAACAC
>gi|197255513|gb|FJ027633.1|_Gnorimopsar_chopi_voucher_MACN-Or-ct_1887_cytochrome_oxidase_subunit_1_(COI)_gene_partial_cds_mitochondrial
CTATACATAATTTTCGGTGCATGAGCCGGAATGGTAGGTACCGCCCTAAGCCTCCTCATTCGAGCAGAACTAGGTCAACCTGGAGCTCTTCTAGGAGACGACCAAGTCTACAACGTAGTCGTCACGGCCCATGCTTTCGTAATAATCTTCTTCATAGTCATGCCAATTATAATCGGAGGGTTCGGGAACTGACTAGTTCCCCTAATAATCGGAGCCCCAGATATGGCATTCCCACGAATAAACAATATAAGCTTCTGACTACTCCCCCCATCCTTCCTCCTTCTCATAGCATCTTCCACAGTTGAAGCAGGTGTAGGAACAGGCTGAACAGTGTACCCCCCACTAGCAGGCAACTTAGCCCACGCCGGAGCCTCAGTCGACCTAGCAATTTTCTCCCTACATCTAGCCGGTATCTCTTCAATCCTAGGAGCAATCAATTTTATTACAACAGCAATCAACATAAAACCTCCCGCCCTATCGCAATACCAAACTCCCCTATTCGTTTGATCAGTCTTAATCACTGCAGTACTGCTACTCCTATCTCTTCCAGTTCTAGCTGCAGGAATTACAATGCTTCTTACAGACCGTAACCTCAACACCACATTCTTTGATCCAGCTGGAGGAGGGGACCCTGTACTATACCAACAC
>gi|197255509|gb|FJ027631.1|_Glaucidium_nanum_voucher_MACN-Or-ct_2620_cytochrome_oxidase_subunit_1_(COI)_gene_partial_cds_mitochondrial
CTTTACTTAATCTTCGGCGCATGAGCTGGCATGGCAGGAACAGCCCTTAGTCTCCTCATTCGGGCCGAACTGGGACAACCAGGAACACTACTGGGAGACGACCAAATCTACAACGTAATCGTTACCGCCCATGCCTTCGTAATAATCTTCTTCATGGTCATACCCATCATAATCGGAGGTTTCGGAAACTGACTAGTCCCACTAATAATCGGAGCCCCAGACATAGCCTTCCCCCGCATAAATAACATAAGCTTCTGACTCTTGCCGCCCTCCCTCACCCTCCTTCTAGCCTCCTCCACAGTAGAAGCCGGCGCCGGCACTGGATGAACAGTCTATCCGCCCCTGGCCAGCAACCTGGCCCACGCCGGAGCCTCCGTAGACCTAGCCATCTTCTCCCTCCACCTTGCAGGCGTATCCTCCATCCTAGGCGCCATCAACTTCATTACAACCGCCATCAACATAAAACCCCCATCCCTATCACAATACCAAACCCCCCTATTCGTATGATCCGTGCTCATCACCGCCATCCTCCTACTCCTATCCCTCCCCGTATTAGCAGCAGGAATTACCATGCTCCTAACAGACCGCAACCTAAATACAACATTTTTTGACCCAGCTGGCGGAGGCGACCCAATCTTATACCAACAC
>gi|197255505|gb|FJ027629.1|_Glaucidium_brasilianum_voucher_MACN-Or-ct_382_cytochrome_oxidase_subunit_1_(COI)_gene_partial_cds_mitochondrial
[truncated: 8,496,190 more chars]
