# Supplementary material for: Frequency Matrix Approach Demonstrates High Sequence Quality in Avian BARCODEs and Highlights Cryptic Pseudogenes
Source: PLoS One. 2012 Aug 27;7(8):e43992. doi: 10.1371/journal.pone.0043992 (PMC3428349; doi:10.1371/journal.pone.0043992)
Supplement: Dataset S2 — Nucleotide and amino acid frequency matrices and modal sequences generated from avian BARCODE dataset. (XLSX) [file pone.0043992.s005.xlsx]

## Sheet: NT FREQUENCY MATRIX
		BARCODE NT	1	2	3	4	5	6	7	8	9	10	11	12	13	14	15	16	17	18	19	20	21	22	23	24	25	26	27	28	29	30	31	32	33	34	35	36	37	38	39	40	41	42	43	44	45	46	47
		BARCODE CODON	0.666667	1	1.33333	1.66667	2	2.33333	2.66667	3	3.33333	3.66667	4	4.33333	4.66667	5	5.33333	5.66667	6	6.33333	6.66667	7	7.33333	7.66667	8	8.33333	8.66667	9	9.33333	9.66667	10	10.3333	10.6667	11	11.3333	11.6667	12	12.3333	12.6667	13	13.3333	13.6667	14	14.3333	14.6667	15	15.3333	15.6667	16
		CODON POSITION	1	2	3	1	2	3	1	2	3	1	2	3	1	2	3	1	2	3	1	2	3	1	2	3	1	2	3	1	2	3	1	2	3	1	2	3	1	2	3	1	2	3	1	2	3	1	2
NO.	NUCLEOTIDE	A	2	2	4537	8	8832	13	97	0	7654	9615	4	19	1	6	0	0	6	1724	282	0	8817	0	0	9665	10	1	1218	3	6	5324	10832	1	9391	3135	2	3583	3	0	2410	11023	2	1723	2	0	1173	14	2
		C	8190	7	1626	1	2	7547	7710	8	540	79	2	6046	1	3	7523	0	2	5909	0	10421	927	0	0	0	1	10616	6851	3	0	3090	4	10	0	3	321	2514	1	4	3516	1	11046	6858	2	11075	9283	10669	1
		G	1	2	1320	5	1	0	66	1	608	63	0	12	1	2	8	10268	10290	675	10105	0	263	2	10539	885	10557	2	183	10691	10723	698	0	0	1505	7779	1	1721	10969	10995	123	2	2	29	10735	4	20	15	0
		T	539	8767	1313	8832	17	1317	1491	9594	827	11	9848	3736	10089	10138	2642	2	1	1990	3	0	398	10485	1	0	2	2	2381	0	2	1648	3	10860	1	2	10602	3142	4	0	4954	2	4	2456	330	0	618	390	11127
		SUM	8732	8778	8796	8846	8852	8877	9364	9603	9629	9768	9854	9813	10092	10149	10173	10270	10299	10298	10390	10421	10405	10487	10540	10550	10570	10621	10633	10697	10731	10760	10839	10871	10897	10919	10926	10960	10977	10999	11003	11028	11054	11066	11069	11079	11094	11088	11130
		MAX	8190	8767	4537	8832	8832	7547	7710	9594	7654	9615	9848	6046	10089	10138	7523	10268	10290	5909	10105	10421	8817	10485	10539	9665	10557	10616	6851	10691	10723	5324	10832	10860	9391	7779	10602	3583	10969	10995	4954	11023	11046	6858	10735	11075	9283	10669	11127
		1st MODAL (MAX/SUM)	0.937929	0.998747	0.515803	0.998417	0.997741	0.850175	0.823366	0.999063	0.79489	0.984337	0.999391	0.616121	0.999703	0.998916	0.739507	0.999805	0.999126	0.573801	0.97257	1	0.847381	0.999809	0.999905	0.916114	0.99877	0.999529	0.644315	0.999439	0.999254	0.494796	0.999354	0.998988	0.861797	0.712428	0.970346	0.326916	0.999271	0.999636	0.450241	0.999547	0.999276	0.619736	0.969826	0.999639	0.836759	0.962211	0.99973
		MODAL SEQUENCE	C	T	A	T	A	C	C	T	A	A	T	C	T	T	C	G	G	C	G	C	A	T	G	A	G	C	C	G	G	A	A	T	A	G	T	A	G	G	T	A	C	C	G	C	C	C	T
FREQUENCY	NUCLEOTIDE	A	0.000229043	0.000227842	0.515803	0.000904364	0.997741	0.00146446	0.0103588	0	0.79489	0.984337	0.000405927	0.00193621	9.90884e-05	0.000591191	0	0	0.000582581	0.167411	0.0271415	0	0.847381	0	0	0.916114	0.000946074	9.41531e-05	0.114549	0.000280452	0.000559128	0.494796	0.999354	9.19879e-05	0.861797	0.287114	0.00018305	0.326916	0.000273299	0	0.219031	0.999547	0.00018093	0.155702	0.000180685	0	0.105733	0.00126263	0.000179695
		C	0.937929	0.000797448	0.184857	0.000113045	0.000225938	0.850175	0.823366	0.000833073	0.0560806	0.00808763	0.000202963	0.616121	9.90884e-05	0.000295596	0.739507	0	0.000194194	0.573801	0	1	0.0890918	0	0	0	9.46074e-05	0.999529	0.644315	0.000280452	0	0.287175	0.000369038	0.000919879	0	0.00027475	0.0293795	0.22938	9.10996e-05	0.000363669	0.319549	9.06783e-05	0.999276	0.619736	0.000180685	0.999639	0.836759	0.962211	8.98473e-05
		G	0.000114521	0.000227842	0.150068	0.000565227	0.000112969	0	0.00704827	0.000104134	0.0631426	0.00644963	0	0.00122287	9.90884e-05	0.000197064	0.000786395	0.999805	0.999126	0.0655467	0.97257	0	0.0252763	0.000190712	0.999905	0.0838863	0.99877	0.000188306	0.0172106	0.999439	0.999254	0.0648699	0	0	0.138111	0.712428	9.15248e-05	0.157026	0.999271	0.999636	0.0111788	0.000181357	0.00018093	0.00262064	0.969826	0.000361043	0.00180278	0.00135281	0
		T	0.061727	0.998747	0.149272	0.998417	0.00192047	0.148361	0.159227	0.999063	0.0858864	0.00112613	0.999391	0.380719	0.999703	0.998916	0.259707	0.000194742	9.70968e-05	0.193241	0.000288739	0	0.0382508	0.999809	9.48767e-05	0	0.000189215	0.000188306	0.223926	0	0.000186376	0.15316	0.000276778	0.998988	9.17684e-05	0.000183167	0.970346	0.286679	0.000364398	0	0.450241	0.000181357	0.00036186	0.221941	0.029813	0	0.0557058	0.0351732	0.99973
[truncated: 601 more columns]

## Sheet: AA FREQUENCY MATRIX
		AA NO.	1	2	3	4	5	6	7	8	9	10	11	12	13	14	15	16	17	18	19	20	21	22	23	24	25	26	27	28	29	30	31	32	33	34	35	36	37	38	39	40	41	42	43	44	45	46	47
NO.	AMINO ACID	A	0	0	0	0	0	1	10068	0	10541	0	0	313	3	1	10731	0	2	0	0	0	0	11164	0	0	1	0	0	0	4916	0	0	0	1	0	0	0	0	0	2	1	0	3	11310	0	11316	0	1
		C	0	1	0	0	1	1	0	0	0	0	0	1	3	1	0	0	1	0	0	0	0	0	0	0	0	0	0	0	0	0	0	3	0	0	0	0	0	0	0	0	0	0	0	0	0	0	0
		D	0	1	0	0	0	5	0	0	0	1	0	0	0	1	0	0	0	0	0	0	0	1	1	0	1	0	0	0	0	0	0	3	11291	11299	0	0	0	0	0	0	0	0	0	0	0	0	0
		E	0	0	0	0	0	1	0	0	0	4	0	1	0	0	0	0	0	0	1	0	0	0	11235	0	0	0	0	0	0	0	0	9	1	1	0	0	0	0	1	0	0	0	0	0	0	0	0
		F	3	3	23	8	10035	0	0	0	0	0	0	1	0	0	0	6	0	1	16	2	0	0	0	0	0	0	0	0	0	2	3	0	0	0	0	0	0	0	0	1	0	0	0	0	0	11309	0
		G	0	0	0	0	0	10241	0	1	1	10669	0	0	10946	0	1	0	1	0	0	0	0	0	0	0	11226	0	0	11280	1	0	0	11279	0	0	0	0	0	0	1	0	0	0	1	0	0	0	0
		H	0	0	0	0	0	0	0	0	0	0	1	0	0	0	0	0	0	1	0	2	3	0	0	0	0	1	0	0	0	0	0	0	1	0	0	0	0	1	0	0	0	0	0	11310	0	0	0
		I	0	1	4	9495	0	0	0	0	0	0	0	3109	0	0	0	4	0	31	20	11183	0	0	0	0	0	0	0	0	0	0	5	0	0	0	0	7999	0	0	0	7317	0	0	0	0	0	0	34
		K	0	0	0	0	0	0	0	0	0	0	0	0	0	0	0	0	0	0	0	0	0	0	1	1	0	0	0	0	0	0	0	0	0	0	0	0	0	6	0	0	0	0	0	0	0	0	0
		L	8682	1	9148	77	8	0	0	0	0	0	6	3	0	1	0	11048	0	11134	11110	3	0	1	0	11213	1	1	0	0	0	11280	11263	0	0	0	0	0	0	0	0	0	1	0	0	0	0	2	0
		M	2	7	92	31	0	0	0	0	0	0	10816	11	0	3	0	9	1	0	2	1	0	0	0	7	0	1	0	0	0	0	6	0	0	0	0	7	0	0	0	1	0	0	0	0	0	0	1
		N	0	0	0	2	0	0	0	0	0	0	0	0	0	1	0	1	0	0	0	0	0	0	0	0	0	0	0	0	2	0	0	0	1	1	0	0	0	11279	0	0	0	0	0	0	0	0	0
		P	6	0	6	0	0	0	0	0	1	0	0	0	0	0	1	1	0	1	1	0	2	0	0	1	0	0	11262	0	1	0	0	0	0	0	0	0	0	0	0	0	0	1	0	0	0	0	0
		Q	1	0	0	0	0	0	0	0	0	0	0	0	0	0	0	1	0	0	0	0	1	0	0	0	0	11254	0	0	0	1	0	0	0	0	11307	0	0	0	0	0	0	0	0	0	0	0	0
		R	1	0	0	0	0	0	0	0	0	3	0	0	1	0	1	0	1	0	0	0	11210	0	0	0	0	0	2	0	0	0	0	0	0	0	0	0	0	0	0	0	0	0	0	0	0	0	0
		S	0	2	2	1	4	0	3	0	3	3	0	0	2	2	330	0	11131	1	1	2	1	18	0	0	8	0	0	0	211	0	0	0	0	0	0	0	0	0	0	0	0	1	0	0	0	1	0
		T	0	0	0	1	0	0	281	0	9	0	10	8	1	11014	1	0	0	1	1	0	0	43	0	0	0	0	0	0	6147	0	0	0	0	0	0	2	0	0	0	2	0	11304	1	0	0	0	0
		V	1	4	66	62	1	1	0	1	2	2	0	7456	0	0	0	15	0	1	5	1	0	2	0	1	0	0	0	0	0	0	4	0	1	0	0	3296	0	0	11302	3983	11306	0	0	0	0	0	11285
		W	1	0	1	0	0	0	0	10481	0	0	0	0	0	0	1	0	0	0	0	0	5	0	0	0	0	0	0	1	0	0	0	0	0	0	0	0	0	0	0	0	0	0	0	0	0	0	0
		Y	1	8790	0	2	5	0	0	0	0	0	0	0	0	0	0	0	2	0	0	1	0	0	1	0	0	1	0	0	0	0	0	0	0	0	0	0	11304	2	0	0	0	0	0	0	0	1	0
		MAX	8682	8790	9148	9495	10035	10241	10068	10481	10541	10669	10816	7456	10946	11014	10731	11048	11131	11134	11110	11183	11210	11164	11235	11213	11226	11254	11262	11280	6147	11280	11263	11279	11291	11299	11307	7999	11304	11279	11302	7317	11306	11304	11310	11310	11316	11309	11285
		SUM	8698	8810	9342	9679	10054	10250	10352	10483	10557	10682	10833	10903	10956	11024	11066	11085	11139	11171	11157	11195	11222	11229	11238	11223	11237	11258	11264	11281	11278	11283	11281	11294	11296	11301	11307	11304	11304	11288	11306	11305	11307	11309	11312	11310	11316	11313	11321
		1st MODAL (MAX/SUM)	0.99816	0.99773	0.979234	0.98099	0.99811	0.999122	0.972566	0.999809	0.998484	0.998783	0.998431	0.683848	0.999087	0.999093	0.969727	0.996662	0.999282	0.996688	0.995787	0.998928	0.998931	0.994211	0.999733	0.999109	0.999021	0.999645	0.999822	0.999911	0.545043	0.999734	0.998404	0.998672	0.999557	0.999823	1	0.707626	1	0.999203	0.999646	0.647236	0.999912	0.999558	0.999823	1	1	0.999646	0.99682
		MODAL	L	Y	L	I	F	G	A	W	A	G	M	V	G	T	A	L	S	L	L	I	R	A	E	L	G	Q	P	G	T	L	L	G	D	D	Q	I	Y	N	V	I	V	T	A	H	A	F	V
FREQUENCY	AMINO ACID	A	0	0	0	0	0	9.7561e-05	0.972566	0	0.998484	0	0	0.0287077	0.000273823	9.07112e-05	0.969727	0	0.000179549	0	0	0	0	0.994211	0	0	8.89917e-05	0	0	0	0.435893	0	0	0	8.85269e-05	0	0	0	0	0	0.000176897	8.84564e-05	0	0.000265275	0.999823	0	1	0	8.83314e-05
		C	0	0.000113507	0	0	9.94629e-05	9.7561e-05	0	0	0	0	0	9.17179e-05	0.000273823	9.07112e-05	0	0	8.97747e-05	0	0	0	0	0	0	0	0	0	0	0	0	0	0	0.000265628	0	0	0	0	0	0	0	0	0	0	0	0	0	0	0
		D	0	0.000113507	0	0	0	0.000487805	0	0	0	9.36154e-05	0	0	0	9.07112e-05	0	0	0	0	0	0	0	8.90551e-05	8.89838e-05	0	8.89917e-05	0	0	0	0	0	0	0.000265628	0.999557	0.999823	0	0	0	0	0	0	0	0	0	0	0	0	0
		E	0	0	0	0	0	9.7561e-05	0	0	0	0.000374462	0	9.17179e-05	0	0	0	0	0	0	8.96298e-05	0	0	0	0.999733	0	0	0	0	0	0	0	0	0.000796883	8.85269e-05	8.84877e-05	0	0	0	0	8.84486e-05	0	0	0	0	0	0	0	0
		F	0.000344907	0.000340522	0.002462	0.000826532	0.99811	0	0	0	0	0	0	9.17179e-05	0	0	0	0.000541272	0	8.95175e-05	0.00143408	0.000178651	0	0	0	0	0	0	0	0	0	0.000177258	0.000265934	0	0	0	0	0	0	0	0	8.84564e-05	0	0	0	0	0	0.999646	0
		G	0	0	0	0	0	0.999122	0	9.53925e-05	9.47239e-05	0.998783	0	0	0.999087	0	9.03669e-05	0	8.97747e-05	0	0	0	0	0	0	0	0.999021	0	0	0.999911	8.86682e-05	0	0	0.998672	0	0	0	0	0	0	8.84486e-05	0	0	0	8.84017e-05	0	0	0	0
		H	0	0	0	0	0	0	0	0	0	0	9.23105e-05	0	0	0	0	0	0	8.95175e-05	0	0.000178651	0.000267332	0	0	0	0	8.88257e-05	0	0	0	0	0	0	8.85269e-05	0	0	0	0	8.85897e-05	0	0	0	0	0	1	0	0	0
		I	0	0.000113507	0.000428174	0.98099	0	0	0	0	0	0	0	0.285151	0	0	0	0.000360848	0	0.00277504	0.0017926	0.998928	0	0	0	0	0	0	0	0	0	0	0.000443223	0	0	0	0	0.707626	0	0	0	0.647236	0	0	0	0	0	0	0.00300327
		K	0	0	0	0	0	0	0	0	0	0	0	0	0	0	0	0	0	0	0	0	0	0	8.89838e-05	8.91027e-05	0	0	0	0	0	0	0	0	0	0	0	0	0	0.000531538	0	0	0	0	0	0	0	0	0
		L	0.99816	0.000113507	0.979234	0.00795537	0.000795703	0	0	0	0	0	0.000553863	0.000275154	0	9.07112e-05	0	0.996662	0	0.996688	0.995787	0.000267977	0	8.90551e-05	0	0.999109	8.89917e-05	8.88257e-05	0	0	0	0.999734	0.998404	0	0	0	0	0	0	0	0	0	8.84408e-05	0	0	0	0	0.000176788	0
		M	0.000229938	0.000794552	0.009848	0.00320281	0	0	0	0	0	0	0.998431	0.0010089	0	0.000272134	0	0.000811908	8.97747e-05	0	0.00017926	8.93256e-05	0	0	0	0.000623719	0	8.88257e-05	0	0	0	0	0.000531868	0	0	0	0	0.00061925	0	0	0	8.84564e-05	0	0	0	0	0	0	8.83314e-05
		N	0	0	0	0.000206633	0	0	0	0	0	0	0	0	0	9.07112e-05	0	9.0212e-05	0	0	0	0	0	0	0	0	0	0	0	0	0.000177336	0	0	0	8.85269e-05	8.84877e-05	0	0	0	0.999203	0	0	0	0	0	0	0	0	0
		P	0.000689814	0	0.000642261	0	0	0	0	0	9.47239e-05	0	0	0	0	0	9.03669e-05	9.0212e-05	0	8.95175e-05	8.96298e-05	0	0.000178221	0	0	8.91027e-05	0	0	0.999822	0	8.86682e-05	0	0	0	0	0	0	0	0	0	0	0	0	8.84251e-05	0	0	0	0	0
		Q	0.000114969	0	0	0	0	0	0	0	0	0	0	0	0	0	0	9.0212e-05	0	0	0	0	8.91107e-05	0	0	0	0	0.999645	0	0	0	8.86289e-05	0	0	0	0	1	0	0	0	0	0	0	0	0	0	0	0	0
		R	0.000114969	0	0	0	0	0	0	0	0	0.000280846	0	0	9.12742e-05	0	9.03669e-05	0	8.97747e-05	0	0	0	0.998931	0	0	0	0	0	0.000177557	0	0	0	0	0	0	0	0	0	0	0	0	0	0	0	0	0	0	0	0
		S	0	0.000227015	0.000214087	0.000103316	0.000397852	0	0.000289799	0	0.000284172	0.000280846	0	0	0.000182548	0.000181422	0.0298211	0	0.999282	8.95175e-05	8.96298e-05	0.000178651	8.91107e-05	0.00160299	0	0	0.000711934	0	0	0	0.018709	0	0	0	0	0	0	0	0	0	0	0	0	8.84251e-05	0	0	0	8.83939e-05	0
		T	0	0	0	0.000103316	0	0	0.0271445	0	0.000852515	0	0.000923105	0.000733743	9.12742e-05	0.999093	9.03669e-05	0	0	8.95175e-05	8.96298e-05	0	0	0.00382937	0	0	0	0	0	0	0.545043	0	0	0	0	0	0	0.000176929	0	0	0	0.000176913	0	0.999558	8.84017e-05	0	0	0	0
		V	0.000114969	0.00045403	0.00706487	0.00640562	9.94629e-05	9.7561e-05	0	9.53925e-05	0.000189448	0.000187231	0	0.683848	0	0	0	0.00135318	0	8.95175e-05	0.000448149	8.93256e-05	0	0.00017811	0	8.91027e-05	0	0	0	0	0	0	0.000354578	0	8.85269e-05	0	0	0.291578	0	0	0.999646	0.352322	0.999912	0	0	0	0	0	0.99682
		W	0.000114969	0	0.000107043	0	0	0	0	0.999809	0	0	0	0	0	0	9.03669e-05	0	0	0	0	0	0.000445553	0	0	0	0	0	0	8.86446e-05	0	0	0	0	0	0	0	0	0	0	0	0	0	0	0	0	0	0	0
		Y	0.000114969	0.99773	0	0.000206633	0.000497315	0	0	0	0	0	0	0	0	0	0	0	0.000179549	0	0	8.93256e-05	0	0	8.89838e-05	0	0	8.88257e-05	0	0	0	0	0	0	0	0	0	0	1	0.000177179	0	0	0	0	0	0	0	8.83939e-05	0
[truncated: 169 more columns]
